# Supplementary material
Source: publisher site journal article supplement (https://www.spandidos-publications.com/1487/downloadSupplementary)
Supplement: Supplementary file 1 [file downloadSupplementary]

## Sheet: Identified proteins
Protein IDs	Majority protein IDs	Peptide counts (all)	Peptide counts (razor+unique)	Peptide counts (unique)	Protein names	Gene names	Fasta headers	Number of proteins	Peptides	Razor + unique peptides	Unique peptides	Peptides U87MG1	Peptides U87MG2	Peptides U87MG3	Peptides T98G1	Peptides T98G2	Peptides T98G3	Razor + unique peptides U87MG1	Razor + unique peptides U87MG2	Razor + unique peptides U87MG3	Razor + unique peptides T98G1	Razor + unique peptides T98G2	Razor + unique peptides T98G3	Unique peptides U87MG1	Unique peptides U87MG2	Unique peptides U87MG3	Unique peptides T98G1	Unique peptides T98G2	Unique peptides T98G3	Sequence coverage (%)	Unique + razor sequence coverage (%)	Unique sequence coverage (%)	Mol. weight (kDa)	Sequence length	Sequence lengths	Q-value	Score	Sequence coverage U87MG1 (%)	Sequence coverage U87MG2 (%)	Sequence coverage U87MG3 (%)	Sequence coverage T98G1 (%)	Sequence coverage T98G2 (%)	Sequence coverage T98G3 (%)	Intensity	Intensity U87MG1	Intensity U87MG2	Intensity U87MG3	Intensity T98G1	Intensity T98G2
E5RIU6;A0A087WZZ9;A0A024QZP7;P06493;F8VXD2;K7ELV5;F8VYH9;F8VZZ0;F8VTV8;F8VWX7;F8VZ51;K7EJ83;E7ESI2;H0YAZ9;Q9BVE2;E7EUK8;G3V5T9;E5RGN0;A0A087X209;A0A087WZU2;F5H6Z0;J3QSD7;P11802-2;P06493-2;Q00535-2;P24941-2;Q00535;P24941;P11802;Q00526;Q00534;Q96Q40-2;P50750;Q96Q40-4;Q96Q40-3;O94921-3;Q96Q40-5;Q96Q40;O94921-2;O94921;P50750-2;Q00536;Q00536-3;Q00537-2;Q00537;Q00536-2;Q9NYV4-3;Q14004-2;Q9NYV4-2;Q9NYV4…	E5RIU6;A0A087WZZ9;A0A024QZP7;P06493;F8VXD2;K7ELV5;F8VYH9;F8VZZ0;F8VTV8;F8VWX7;F8VZ51;K7EJ83;E7ESI2;H0YAZ9;Q9BVE2;E7EUK8;G3V5T9;E5RGN0;A0A087X209;A0A087WZU2;F5H6Z0;J3QSD7;P11802-2;P06493-2;Q00535-2;P24941-2;Q00535;P24941;P11802;Q00526;Q00534;Q96Q40-2;P50750;Q96Q40-4;Q96Q40-3;O94921-3;Q96Q40-5;Q96Q40;O94921-2;O94921;P50750-2;Q00536;Q00536-3;Q00537-2;Q00537;Q00536-2;Q9NYV4-3;Q14004-2;Q9NYV4-2;Q9NYV4…	2;2;2;2;1;1;1;1;1;1;1;1;1;1;1;1;1;1;1;1;1;1;1;1;1;1;1;1;1;1;1;1;1;1;1;1;1;1;1;1;1;1;1;1;1;1;1;1;1;1;1	2;2;2;2;1;1;1;1;1;1;1;1;1;1;1;1;1;1;1;1;1;1;1;1;1;1;1;1;1;1;1;1;1;1;1;1;1;1;1;1;1;1;1;1;1;1;1;1;1;1;1	1;1;1;1;0;0;0;0;0;0;0;0;0;0;0;0;0;0;0;0;0;0;0;1;0;0;0;0;0;0;0;0;0;0;0;0;0;0;0;0;0;0;0;0;0;0;0;0;0;0;0	Cyclin-dependent kinase 1;Cyclin-dependent kinase 4;Cyclin-dependent-like kinase 5;Cyclin-dependent kinase 2;Cyclin-dependent kinase 3;Cyclin-dependent kinase 6;Cyclin-dependent kinase 15;Cyclin-dependent kinase 9;Cyclin-dependent kinase 14;Cyclin-dependent kinase 16;Cyclin-dependent kinase 17;Cyclin-dependent kinase 12;Cyclin-dependent kinase 13	CDK1;CDC2;CDK4;CDK3;CDK2;CDK16;CDK13;CDK14;CDK17;CDK12;CDK5;CDK6;CDK15;CDK9	Cyclin-dependent kinase 1 (Fragment);Cyclin-dependent kinase 1;Cell division cycle 2, G1 to S and G2 to M, isoform CRA_a;Cyclin-dependent kinase 1;Cyclin-dependent kinase 4 (Fragment);Cyclin-dependent kinase 3 (Fragment);Cyclin-dependent kinase 4 (Fragment	51	2	2	1	1	0	1	1	1	1	1	0	1	1	1	1	0	0	1	0	0	0	13.2	13.2	9	21.738	189	189;224;297;297;132;164;170;186;201;203;208;213;238;260;324;340;346;393;418;448;470;1201;183;240;260;264;292;298;303;305;326;358;372;384;400;423;429;435;451;469;489;496;502;523;523;570;1273;1452;1481;1490;1512	0.005872	2.835	4.2	0	9	4.2	4.2	4.2	21273000	7505200	0	0	7012100	6756000
A0A024QZX5;A0A087X1N8;P35237	A0A024QZX5;A0A087X1N8;P35237	10;10;10	10;10;10	10;10;10	Serpin B6	SERPINB6	Serpin B6;Serpin B6;Serpin B6	3	10	10	10	7	3	8	10	8	10	7	3	8	10	8	10	7	3	8	10	8	10	36.3	36.3	36.3	43.024	380	380;395;376	0	52.604	25.8	8.9	30	36.3	30.8	36.3	224560000	35030000	9738400	35859000	48679000	35423000
A0A024R4E5;Q00341;Q00341-2;H0Y394;H7C0A4;C9JIZ1;C9J5E5;C9JZI8;H7BZC3;H7C2D1;C9JT62;C9JHS7;C9JK79;C9JHZ8;C9JES8;C9JBS3;C9JEJ8;C9JHN6;C9JMQ6;C9JQ82;C9JHS9;C9J739;H7C3D0	A0A024R4E5;Q00341;Q00341-2;H0Y394	30;29;26;22;10;7;6;5;5;5;4;4;4;4;4;3;3;3;2;2;1;1;1	30;29;26;22;10;7;6;5;5;5;4;4;4;4;4;3;3;3;2;2;1;1;1	30;29;26;22;10;7;6;5;5;5;4;4;4;4;4;3;3;3;2;2;1;1;1	Vigilin	HDLBP	High density lipoprotein binding protein (Vigilin), isoform CRA_a;Vigilin;Isoform 2 of Vigilin;Vigilin (Fragment)	23	30	30	30	19	14	19	18	23	19	19	14	19	18	23	19	19	14	19	18	23	19	35.1	35.1	35.1	141.44	1268	1268;1268;1235;973;332;224;221;164;267;308;96;126;128;141;147;69;79;81;46;53;17;19;126	0	162.02	23.4	17.8	23.7	20.8	26	22.1	637920000	103030000	46072000	130790000	113960000	140630000
A0A024R4M0;P46781;B5MCT8;C9JM19;F2Z3C0;A8MXK4	A0A024R4M0;P46781;B5MCT8;C9JM19	10;10;8;8;4;4	10;10;8;8;4;4	10;10;8;8;4;4	40S ribosomal protein S9	RPS9	40S ribosomal protein S9;40S ribosomal protein S9;40S ribosomal protein S9;40S ribosomal protein S9	6	10	10	10	8	7	6	7	9	7	8	7	6	7	9	7	8	7	6	7	9	7	36.6	36.6	36.6	22.591	194	194;194;139;156;77;79	0	24.201	30.9	26.8	26.3	27.3	33	28.4	423710000	61909000	49464000	72715000	76828000	83124000
A0A024R571;Q9H4M9;C9JC03;C9J2Z4;C9JIJ3;C9IZH1;C9JDQ8	A0A024R571;Q9H4M9;C9JC03;C9J2Z4	14;14;9;7;4;4;3	14;14;9;7;4;4;3	10;10;5;5;2;2;1	EH domain-containing protein 1	EHD1	EH domain-containing protein 1;EH domain-containing protein 1;EH domain-containing protein 1 (Fragment);EH domain-containing protein 1 (Fragment)	7	14	14	10	11	9	10	2	4	2	11	9	10	2	4	2	7	6	6	1	2	0	47.1	47.1	34.5	61.927	548	548;534;374;306;145;148;162	0	65.91	32.5	25.4	35	6.2	15.9	5.1	214280000	64549000	25875000	95343000	9279400	17270000
A0A024RA52;P25787;C9JCK5;H7C402;H3BT36	A0A024RA52;P25787;C9JCK5	5;5;3;1;1	5;5;3;1;1	5;5;3;1;1	Proteasome subunit alpha type;Proteasome subunit alpha type-2	PSMA2	Proteasome subunit alpha type;Proteasome subunit alpha type-2;Proteasome endopeptidase complex	5	5	5	5	3	3	4	4	3	4	3	3	4	4	3	4	3	3	4	4	3	4	35	35	35	25.898	234	234;234;164;36;48	0	37.537	26.1	26.1	32.1	32.1	26.1	29.1	209790000	29537000	19245000	53583000	32812000	30711000
H0Y7V4;A0A075B6F3;Q96JB1-2;Q96JB1	H0Y7V4;A0A075B6F3;Q96JB1-2;Q96JB1	2;2;2;2	2;2;2;2	2;2;2;2	Dynein heavy chain 8, axonemal	DNAH8	Dynein heavy chain 8, axonemal;Dynein heavy chain 8, axonemal;Isoform 2 of Dynein heavy chain 8, axonemal;Dynein heavy chain 8, axonemal	4	2	2	2	2	1	1	1	2	2	2	1	1	1	2	2	2	1	1	1	2	2	0.4	0.4	0.4	478.87	4188	4188;4707;4454;4490	0.0041518	2.9688	0.4	0.2	0.2	0.2	0.4	0.4	198740000	48212000	15090000	33228000	23289000	38448000
A0A075B7D9;Q92804-2;Q92804;A0A075B7F4	A0A075B7D9;Q92804-2;Q92804;A0A075B7F4	4;4;4;2	2;2;2;2	2;2;2;2	TATA-binding protein-associated factor 2N	TAF15	TATA-binding protein-associated factor 2N;Isoform Short of TATA-binding protein-associated factor 2N;TATA-binding protein-associated factor 2N;TATA-binding protein-associated factor 2N (Fragment)	4	4	2	2	3	2	4	3	3	4	1	0	2	1	1	2	1	0	2	1	1	2	12.5	7.3	7.3	48.839	449	449;589;592;214	0.0007837	8.3405	9.1	5.1	12.5	9.1	9.1	12.5	29284000	3043000	0	5997600	0	1128200
E9PKG6;V9HW75;A0A087WSV8;P80303-2;P80303;Q2L696;E9PLR0;E9PLE9;E9PJP3;H0YD18;E9PM22;H0YEG8	E9PKG6;V9HW75;A0A087WSV8;P80303-2;P80303;Q2L696;E9PLR0;E9PLE9	6;6;6;5;5;4;3;3;2;2;2;1	6;6;6;5;5;4;3;3;2;2;2;1	6;6;6;5;5;4;3;3;2;2;2;1	Nucleobindin-2;Nesfatin-1	NUCB2;HEL-S-109;Nucb2	Nucleobindin-2;Epididymis secretory protein Li 109;Nucleobindin 2, isoform CRA_b;Isoform 2 of Nucleobindin-2;Nucleobindin-2;Nucb2 splice variant;Nucleobindin-2 (Fragment);Nucleobindin-2 (Fragment)	12	6	6	6	4	2	3	4	3	4	4	2	3	4	3	4	4	2	3	4	3	4	22.8	22.8	22.8	40.368	338	338;420;420;420;420;390;195;198;69;73;90;198	0	21.018	14.2	5.9	9.8	14.2	10.4	15.7	71234000	10110000	6539500	10744000	20808000	10938000
F8W809;A0A087WSW9;A0A182DWI3;A0A087WSY9;Q16881-5;Q16881-2;Q16881-4;Q16881-3;Q16881-6;Q16881;E9PIR7;E2QRB9;Q16881-7;E9PKD3;A0A0B4J225;E9PIZ5;E9PLT3;E9PKI4;E9PQI3;E9PRI8	F8W809;A0A087WSW9;A0A182DWI3;A0A087WSY9;Q16881-5;Q16881-2;Q16881-4;Q16881-3;Q16881-6;Q16881;E9PIR7;E2QRB9;Q16881-7	25;25;25;25;25;25;25;25;25;25;24;23;23;10;5;5;3;3;2;1	25;25;25;25;25;25;25;25;25;25;24;23;23;10;5;5;3;3;2;1	24;24;24;24;24;24;24;24;24;24;23;22;22;9;4;4;2;2;2;1	Thioredoxin reductase 1, cytoplasmic	TXNRD1	Thioredoxin reductase 1, cytoplasmic;Thioredoxin reductase 1, cytoplasmic;Thioredoxin reductase 1, cytoplasmic;Thioredoxin reductase 1, cytoplasmic;Isoform 5 of Thioredoxin reductase 1, cytoplasmic;Isoform 2 of Thioredoxin reductase 1, cytoplasmic;Isoform	20	25	25	24	7	7	7	18	21	23	7	7	7	18	21	23	7	7	7	18	21	22	68.1	68.1	65.1	54.603	498	498;548;568;648;499;543;551;598;614;649;482;460;461;175;103;139;70;72;53;44	0	323.31	21.5	24.7	24.1	56.6	64.7	62.9	1738600000	65258000	35761000	76567000	473040000	504470000
K7ERP4;A0A087X2I2;A0A087WT12;P36969-2;P36969;A0A087X247;K7EKX7;R4GNE4;K7ENB4;K7EJ20	K7ERP4;A0A087X2I2;A0A087WT12;P36969-2;P36969;A0A087X247;K7EKX7;R4GNE4;K7ENB4;K7EJ20	2;2;2;2;2;1;1;1;1;1	2;2;2;2;2;1;1;1;1;1	2;2;2;2;2;1;1;1;1;1	Glutathione peroxidase;Phospholipid hydroperoxide glutathione peroxidase, mitochondrial	GPX4	Glutathione peroxidase (Fragment);Glutathione peroxidase;Glutathione peroxidase;Isoform Cytoplasmic of Phospholipid hydroperoxide glutathione peroxidase, mitochondrial;Phospholipid hydroperoxide glutathione peroxidase, mitochondrial;Phospholipid hydroperox	10	2	2	2	1	0	2	0	0	2	1	0	2	0	0	2	1	0	2	0	0	2	16.8	16.8	16.8	17.629	155	155;196;233;170;197;134;175;179;180;242	0.0030525	3.3819	7.7	0	16.8	0	0	16.8	12092000	1103500	0	4854700	0	0
E9PJU8;E9PQS1;A0A087WT99;A0A1W2PRB8;Q9H0W9-4;Q9H0W9-2;Q9H0W9;E9PPB5;Q9H0W9-3	E9PJU8;E9PQS1;A0A087WT99;A0A1W2PRB8;Q9H0W9-4;Q9H0W9-2;Q9H0W9;E9PPB5;Q9H0W9-3	2;2;2;2;2;2;2;1;1	2;2;2;2;2;2;2;1;1	2;2;2;2;2;2;2;1;1	Ester hydrolase C11orf54	C11orf54	Ester hydrolase C11orf54 (Fragment);Ester hydrolase C11orf54 (Fragment);Ester hydrolase C11orf54;Mediator of RNA polymerase II transcription subunit 17;Isoform 4 of Ester hydrolase C11orf54;Isoform 2 of Ester hydrolase C11orf54;Ester hydrolase C11orf54;Est	9	2	2	2	0	0	0	1	1	0	0	0	0	1	1	0	0	0	0	1	1	0	17.6	17.6	17.6	21.116	187	187;239;256;838;204;296;315;185;265	0.0030469	3.3647	0	0	0	6.4	11.2	0	4606200	0	0	0	4606200	0
A0A087WTA8;P08123	A0A087WTA8;P08123	4;4	4;4	4;4	Collagen alpha-2(I) chain	COL1A2	Collagen alpha-2(I) chain;Collagen alpha-2(I) chain	2	4	4	4	1	0	1	3	2	3	1	0	1	3	2	3	1	0	1	3	2	3	4.8	4.8	4.8	129.15	1364	1364;1366	0	12.473	1.3	0	1.3	2.9	2.8	2.9	26503000	4173000	0	3502400	7901000	5844200
F5H5N1;A0A087WXF6;A0A087WTI3;F5GXJ1;O75251-2;O75251	F5H5N1;A0A087WXF6;A0A087WTI3;F5GXJ1;O75251-2;O75251	2;2;2;2;2;2	2;2;2;2;2;2	2;2;2;2;2;2	NADH dehydrogenase [ubiquinone] iron-sulfur protein 7, mitochondrial	NDUFS7	NADH dehydrogenase [ubiquinone] iron-sulfur protein 7, mitochondrial;NADH dehydrogenase [ubiquinone] iron-sulfur protein 7, mitochondrial;NADH dehydrogenase [ubiquinone] iron-sulfur protein 7, mitochondrial;NADH dehydrogenase [ubiquinone] iron-sulfur prote	6	2	2	2	0	0	1	0	0	1	0	0	1	0	0	1	0	0	1	0	0	1	9.9	9.9	9.9	19.77	182	182;214;214;236;206;213	0.0075362	2.7065	0	0	4.9	0	0	4.9	1646000	0	0	0	0	0
A0A087WTV2;K9J957;P61289;P61289-3;P61289-2;K7ENH2;B3KQ25;K7ESG5;B7Z8D3	A0A087WTV2;K9J957;P61289;P61289-3;P61289-2;K7ENH2;B3KQ25;K7ESG5	3;3;3;3;3;2;2;2;1	3;3;3;3;3;2;2;2;1	3;3;3;3;3;2;2;2;1	Proteasome activator complex subunit 3	PSME3	Proteasome activator complex subunit 3;Proteasome activator complex subunit 3;Proteasome activator complex subunit 3;Isoform 3 of Proteasome activator complex subunit 3;Isoform 2 of Proteasome activator complex subunit 3;Proteasome activator complex subuni	9	3	3	3	1	0	0	3	3	1	1	0	0	3	3	1	1	0	0	3	3	1	24.7	24.7	24.7	19.876	170	170;231;254;265;267;179;193;198;130	0	11.502	8.8	0	0	24.7	24.7	8.8	40377000	7889800	0	0	17278000	3604500
E9PL01;A0A087WUC6;E9PI68;Q15005;E9PRB9;H0YE04	E9PL01;A0A087WUC6;E9PI68;Q15005;E9PRB9	4;4;4;4;3;1	4;4;4;4;3;1	4;4;4;4;3;1	Signal peptidase complex subunit 2	SPCS2	Signal peptidase complex subunit 2;Signal peptidase complex subunit 2;Signal peptidase complex subunit 2;Signal peptidase complex subunit 2;Signal peptidase complex subunit 2	6	4	4	4	3	0	1	2	2	3	3	0	1	2	2	3	3	0	1	2	2	3	34.4	34.4	34.4	17.027	157	157;227;257;226;87;166	0	11.254	28.7	0	5.1	17.2	10.8	28.7	33592000	7290500	0	0	7499600	1071600
A0A087WUD3;Q9NRP0;Q9NRP0-2	A0A087WUD3;Q9NRP0;Q9NRP0-2	1;1;1	1;1;1	1;1;1	Oligosaccharyltransferase complex subunit OSTC	OSTC	Oligosaccharyltransferase complex subunit OSTC;Oligosaccharyltransferase complex subunit OSTC;Isoform 2 of Oligosaccharyltransferase complex subunit OSTC	3	1	1	1	0	1	1	1	1	1	0	1	1	1	1	1	0	1	1	1	1	1	14.5	14.5	14.5	9.369	83	83;149;171	0.00066225	4.7286	0	14.5	14.5	14.5	14.5	14.5	25490000	0	1025900	7213400	4205000	3588700
A0A087WUQ6;P07203;P07203-2	A0A087WUQ6;P07203	4;4;1	4;4;1	4;4;1	Glutathione peroxidase;Glutathione peroxidase 1	GPX1	Glutathione peroxidase;Glutathione peroxidase 1	3	4	4	4	4	1	3	0	0	1	4	1	3	0	0	1	4	1	3	0	0	1	28.7	28.7	28.7	21.938	202	202;203;98	0	14.861	28.7	8.9	23.8	0	0	8.9	27021000	12556000	0	13154000	0	0
E7ETK0;A0A087WUS0;P62847-2;P62847-3;P62847;P62847-4	E7ETK0;A0A087WUS0;P62847-2;P62847-3;P62847;P62847-4	3;3;3;3;3;3	3;3;3;3;3;3	3;3;3;3;3;3	40S ribosomal protein S24	RPS24	40S ribosomal protein S24;40S ribosomal protein S24;Isoform 2 of 40S ribosomal protein S24;Isoform 3 of 40S ribosomal protein S24;40S ribosomal protein S24;Isoform 4 of 40S ribosomal protein S24	6	3	3	3	2	2	2	2	2	3	2	2	2	2	2	3	2	2	2	2	2	3	29.8	29.8	29.8	15.197	131	131;132;130;132;133;289	0	25.797	20.6	20.6	20.6	20.6	20.6	29.8	295090000	38453000	28626000	64339000	56348000	44195000
A0A087WUT6;O60841	A0A087WUT6;O60841	5;5	5;5	5;5	Eukaryotic translation initiation factor 5B	EIF5B	Eukaryotic translation initiation factor 5B;Eukaryotic translation initiation factor 5B	2	5	5	5	2	1	5	0	0	0	2	1	5	0	0	0	2	1	5	0	0	0	7.9	7.9	7.9	138.68	1220	1220;1220	0	18.894	2.7	1.1	7.9	0	0	0	35845000	11458000	0	24387000	0	0
A0A087WV29;Q9H0A0-2;Q9H0A0	A0A087WV29;Q9H0A0-2;Q9H0A0	1;1;1	1;1;1	1;1;1	N-acetyltransferase 10	NAT10	RNA cytidine acetyltransferase;Isoform 2 of RNA cytidine acetyltransferase;RNA cytidine acetyltransferase	3	1	1	1	0	0	0	0	1	0	0	0	0	0	1	0	0	0	0	0	1	0	2	2	2	93.533	834	834;953;1025	0.00066711	4.8164	0	0	0	0	2	0	1877600	0	0	0	0	1877600
A0A087WVQ6;Q00610-2;Q00610;J3KS13;P53675-2;P53675;A0A087WX41;K7EJJ5;J3KSQ2;J3KRF5;J3QL20;F5H5N6;A0A087WV74;A0A087WXH4	A0A087WVQ6;Q00610-2;Q00610	75;75;75;22;15;15;14;7;6;5;4;1;1;1	75;75;75;22;15;15;14;7;6;5;4;1;1;1	75;75;75;22;15;15;14;7;6;5;4;1;1;1	Clathrin heavy chain;Clathrin heavy chain 1	CLTC	Clathrin heavy chain;Isoform 2 of Clathrin heavy chain 1;Clathrin heavy chain 1	14	75	75	75	62	60	63	56	58	60	62	60	63	56	58	60	62	60	63	56	58	60	61.7	61.7	61.7	192.06	1679	1679;1639;1675;612;1583;1640;1260;222;122;131;97;169;369;463	0	323.31	49.7	50	53.9	47.5	47.8	52.3	3837600000	641720000	474220000	942780000	552020000	548810000
A0A087WW40;Q9Y371-3;Q9Y371;Q9Y371-2	A0A087WW40;Q9Y371-3;Q9Y371;Q9Y371-2	2;2;2;2	2;2;2;2	2;2;2;2	Endophilin-B1	SH3GLB1	Endophilin-B1;Isoform 3 of Endophilin-B1;Endophilin-B1;Isoform 2 of Endophilin-B1	4	2	2	2	0	0	0	0	0	2	0	0	0	0	0	2	0	0	0	0	0	2	7.6	7.6	7.6	44.26	394	394;265;365;386	0.00076046	7.6923	0	0	0	0	0	7.6	4121500	0	0	0	0	0
A0A087WW43;E7ET33;Q06033-2;Q06033	A0A087WW43;E7ET33;Q06033-2;Q06033	2;2;2;2	2;2;2;2	2;2;2;2	Inter-alpha-trypsin inhibitor heavy chain H3	ITIH3	Inter-alpha-trypsin inhibitor heavy chain H3;Inter-alpha-trypsin inhibitor heavy chain H3;Isoform 2 of Inter-alpha-trypsin inhibitor heavy chain H3;Inter-alpha-trypsin inhibitor heavy chain H3	4	2	2	2	2	2	2	0	0	0	2	2	2	0	0	0	2	2	2	0	0	0	3.3	3.3	3.3	75.077	670	670;698;886;890	0.00075586	7.6477	3.3	3.3	3.3	0	0	0	61376000	20485000	15232000	25659000	0	0
Q8N1B9;C9J6X0;A0A087WXC5;E7ESZ7;O95299;O95299-2	Q8N1B9;C9J6X0;A0A087WXC5;E7ESZ7;O95299;O95299-2	2;2;2;2;2;2	2;2;2;2;2;2	2;2;2;2;2;2	NADH dehydrogenase [ubiquinone] 1 alpha subcomplex subunit 10, mitochondrial	NDUFA10	NADH dehydrogenase (Ubiquinone) 1 alpha subcomplex, 10, 42kDa, isoform CRA_c;NADH dehydrogenase [ubiquinone] 1 alpha subcomplex subunit 10, mitochondrial (Fragment);NADH dehydrogenase [ubiquinone] 1 alpha subcomplex subunit 10, mitochondrial;NADH dehydroge	6	2	2	2	0	0	0	1	1	2	0	0	0	1	1	2	0	0	0	1	1	2	16.4	16.4	16.4	22.373	201	201;244;355;390;355;429	0.00073801	7.0544	0	0	0	10.9	10.9	16.4	13579000	0	0	0	4376000	5708400
A0A087WXM6;J3QQT2;J3KRX5;A0A0A6YYL6;P18621;P18621-3;J3QLC8;A0A0A0MRF8;P18621-2;J3KRB3;A0A087WWH0;J3QS96;A0A087WY81;J3KSJ0	A0A087WXM6;J3QQT2;J3KRX5;A0A0A6YYL6;P18621;P18621-3;J3QLC8;A0A0A0MRF8;P18621-2;J3KRB3;A0A087WWH0;J3QS96;A0A087WY81	7;7;7;7;7;7;6;6;6;5;5;5;4;1	7;7;7;7;7;7;6;6;6;5;5;5;4;1	7;7;7;7;7;7;6;6;6;5;5;5;4;1	60S ribosomal protein L17	RPL17;RPL17-C18orf32	60S ribosomal protein L17 (Fragment);60S ribosomal protein L17 (Fragment);60S ribosomal protein L17 (Fragment);Protein RPL17-C18orf32;60S ribosomal protein L17;Isoform 3 of 60S ribosomal protein L17;60S ribosomal protein L17;RPL17-C18orf32 readthrough;Isof	14	7	7	7	5	5	4	5	5	4	5	5	4	5	5	4	5	5	4	5	5	4	45.6	45.6	45.6	19.586	169	169;171;174;228;184;228;174;190;146;129;131;138;97;56	0	46.25	40.2	40.2	29.6	29	34.3	29.6	336030000	54967000	33232000	62184000	71561000	54511000
A0A087WXP3;E9PEE8;P18564-2;P18564	A0A087WXP3;E9PEE8;P18564-2;P18564	1;1;1;1	1;1;1;1	1;1;1;1	Integrin beta;Integrin beta-6	ITGB6	Integrin beta;Integrin beta;Isoform 2 of Integrin beta-6;Integrin beta-6	4	1	1	1	1	1	1	0	0	0	1	1	1	0	0	0	1	1	1	0	0	0	1.3	1.3	1.3	75.849	693	693;746;681;788	0.0069686	2.7188	1.3	1.3	1.3	0	0	0	28106000	9899800	6219800	11987000	0	0
A0A087WXS7;O43681;K7ERW9	A0A087WXS7;O43681	7;7;3	7;7;3	7;7;3	ATPase ASNA1	ASNA1	ATPase ASNA1;ATPase ASNA1	3	7	7	7	4	3	6	6	3	4	4	3	6	6	3	4	4	3	6	6	3	4	28.4	28.4	28.4	37.119	331	331;348;200	0	19.14	17.8	15.1	22.1	23	11.5	16.9	103500000	15894000	9226300	23189000	20769000	17286000
H7BXI1;A0A087WXU3;A0FGR8-2;A0FGR8;A0FGR8-6;A0FGR8-4	H7BXI1;A0A087WXU3;A0FGR8-2;A0FGR8;A0FGR8-6;A0FGR8-4	4;4;4;4;4;3	4;4;4;4;4;3	4;4;4;4;4;3	Extended synaptotagmin-2	ESYT2	Extended synaptotagmin-2 (Fragment);Extended synaptotagmin-2;Isoform 2 of Extended synaptotagmin-2;Extended synaptotagmin-2;Isoform 6 of Extended synaptotagmin-2;Isoform 4 of Extended synaptotagmin-2	6	4	4	4	1	0	1	1	1	1	1	0	1	1	1	1	1	0	1	1	1	1	7	7	7	98.008	884	884;921;893;921;942;527	0.00078186	8.2938	1.8	0	1.5	1.7	2	1.5	28654000	14194000	0	5548300	2934300	5977200
A0A087WY55;Q9NP79	A0A087WY55;Q9NP79	1;1	1;1	1;1	Vacuolar protein sorting-associated protein VTA1 homolog	VTA1	Chromosome 6 open reading frame 55, isoform CRA_b;Vacuolar protein sorting-associated protein VTA1 homolog	2	1	1	1	0	1	1	1	1	1	0	1	1	1	1	1	0	1	1	1	1	1	5	5	5	31.102	280	280;307	0.003643	3.295	0	5	5	5	5	5	13774000	0	0	2764500	3038000	3676400
A0A087WY71;E9PFW3;Q96CW1-2;Q96CW1;C9JJ47;C9JTK4;C9JGT8;C9JJD3;C9JPV8	A0A087WY71;E9PFW3;Q96CW1-2;Q96CW1;C9JJ47;C9JTK4;C9JGT8	8;8;8;8;6;4;4;3;3	8;8;8;8;6;4;4;3;3	8;8;8;8;6;4;4;3;3	AP-2 complex subunit mu	AP2M1	AP-2 complex subunit mu;AP-2 complex subunit mu;Isoform 2 of AP-2 complex subunit mu;AP-2 complex subunit mu;AP-2 complex subunit mu (Fragment);AP-2 complex subunit mu (Fragment);AP-2 complex subunit mu (Fragment)	9	8	8	8	6	5	6	6	8	5	6	5	6	6	8	5	6	5	6	6	8	5	22.4	22.4	22.4	49.526	434	434;460;433;435;252;160;195;113;136	0	32.655	17.7	14.5	18	17.7	22.4	14.5	189740000	25312000	22488000	33049000	42703000	40347000
D6RFM0;D6RAH7;H9KV45;A0A0A0MQU3;A0A087WY85;P62837-2;P62837;P61077;P61077-2;P61077-3;D6RAW0	D6RFM0;D6RAH7;H9KV45;A0A0A0MQU3;A0A087WY85;P62837-2;P62837;P61077;P61077-2;P61077-3;D6RAW0	2;2;2;2;2;2;2;2;2;2;1	2;2;2;2;2;2;2;2;2;2;1	2;2;2;2;2;2;2;2;2;2;1	Ubiquitin-conjugating enzyme E2 D2;Ubiquitin-conjugating enzyme E2 D3	UBE2D2;UBE2D3	Ubiquitin-conjugating enzyme E2 D2 (Fragment);Ubiquitin-conjugating enzyme E2 D3;Ubiquitin-conjugating enzyme E2 D3;Ubiquitin-conjugating enzyme E2 D2;Ubiquitin-conjugating enzyme E2 D3;Isoform 2 of Ubiquitin-conjugating enzyme E2 D2;Ubiquitin-conjugating	11	2	2	2	2	2	1	2	1	2	2	2	1	2	1	2	2	2	1	2	1	2	35.7	35.7	35.7	11.065	98	98;118;141;147;148;118;147;147;148;149;72	0	9.0881	35.7	35.7	24.5	35.7	24.5	35.7	66723000	16787000	9321800	13350000	14902000	6292100
A0A087WYR0;P09132	A0A087WYR0;P09132	1;1	1;1	1;1	Signal recognition particle 19 kDa protein	SRP19	Signal recognition particle 19 kDa protein;Signal recognition particle 19 kDa protein	2	1	1	1	1	1	1	1	1	1	1	1	1	1	1	1	1	1	1	1	1	1	12.5	12.5	12.5	13.654	120	120;144	0	9.1397	12.5	12.5	12.5	12.5	12.5	12.5	19839000	4298600	0	3247800	4582800	4375700
A0A087WYR3;O43399;O43399-5;O43399-7;O43399-2;O43399-4;O43399-3;A0A087WZ51;O43399-6	A0A087WYR3;O43399;O43399-5;O43399-7;O43399-2;O43399-4;O43399-3;A0A087WZ51;O43399-6	11;11;11;11;9;9;9;7;7	11;11;11;11;9;9;9;7;7	11;11;11;11;9;9;9;7;7	Tumor protein D54	TPD52L2	Tumor protein D54;Tumor protein D54;Isoform 5 of Tumor protein D54;Isoform 7 of Tumor protein D54;Isoform 2 of Tumor protein D54;Isoform 4 of Tumor protein D54;Isoform 3 of Tumor protein D54;Tumor protein D54;Isoform 6 of Tumor protein D54	9	11	11	11	9	9	10	9	9	10	9	9	10	9	9	10	9	9	10	9	9	10	54.1	54.1	54.1	23.764	222	222;206;220;229;186;200;209;152;163	0	175.5	48.2	48.2	49.1	48.2	48.2	54.1	378990000	89525000	41345000	79360000	65270000	49072000
A0A087WYS1;E7EUC7;Q16851-2;Q16851;C9JWG0;C9JVG3;C9JQU9;C9JNZ1;C9JTZ5;C9JUW1	A0A087WYS1;E7EUC7;Q16851-2;Q16851	9;9;9;9;2;2;2;2;1;1	9;9;9;9;2;2;2;2;1;1	9;9;9;9;2;2;2;2;1;1	UTP--glucose-1-phosphate uridylyltransferase	UGP2	UTP--glucose-1-phosphate uridylyltransferase;UTP--glucose-1-phosphate uridylyltransferase;Isoform 2 of UTP--glucose-1-phosphate uridylyltransferase;UTP--glucose-1-phosphate uridylyltransferase	10	9	9	9	6	6	6	4	4	3	6	6	6	4	4	3	6	6	6	4	4	3	26	26	26	56.967	508	508;517;497;508;150;170;175;212;104;135	0	88.288	14.8	19.3	16.7	10.4	12	6.9	224780000	39727000	33388000	84320000	15638000	23630000
A0A087WYT3;Q15185-4;Q15185;Q15185-3;B4DDC6;Q15185-2	A0A087WYT3;Q15185-4;Q15185;Q15185-3	5;5;5;4;2;2	5;5;5;4;2;2	5;5;5;4;2;2	Prostaglandin E synthase 3	PTGES3	Prostaglandin E synthase 3;Isoform 4 of Prostaglandin E synthase 3;Prostaglandin E synthase 3;Isoform 3 of Prostaglandin E synthase 3	6	5	5	5	4	2	4	3	3	3	4	2	4	3	3	3	4	2	4	3	3	3	34.8	34.8	34.8	19.155	164	164;139;160;130;124;127	0	99.221	24.4	15.2	30.5	25.6	19.5	19.5	285430000	62616000	26642000	76431000	34385000	41563000
A0A087WZF1;Q93052;C9JUT4;C9JXK9;C9JE51;C9J2R5;C9JIY7;C9JT42;C9J3U9;C9J1K7;C9J5C8;C9J4E3	A0A087WZF1;Q93052;C9JUT4	7;7;4;3;1;1;1;1;1;1;1;1	7;7;4;3;1;1;1;1;1;1;1;1	7;7;4;3;1;1;1;1;1;1;1;1	Lipoma-preferred partner	LPP	Lipoma-preferred partner;Lipoma-preferred partner;LIM domain containing preferred translocation partner in lipoma, isoform CRA_e	12	7	7	7	1	0	0	5	5	5	1	0	0	5	5	5	1	0	0	5	5	5	22.4	22.4	22.4	63.382	590	590;612;428;252;46;52;57;65;66;93;111;151	0	39.081	2.7	0	0	15.8	14.6	15.1	70498000	0	0	0	25454000	19076000
A0A087WZK9;B3KS98;O15372;E5RJT0;E5RGU4;E5RHC7;E5RH59;E5RFW7;E5RFH0	A0A087WZK9;B3KS98;O15372;E5RJT0	8;8;8;4;2;1;1;1;1	8;8;8;4;2;1;1;1;1	8;8;8;4;2;1;1;1;1	Eukaryotic translation initiation factor 3 subunit H	EIF3H	Eukaryotic translation initiation factor 3 subunit H;Eukaryotic translation initiation factor 3 subunit H;Eukaryotic translation initiation factor 3 subunit H;Eukaryotic translation initiation factor 3 subunit H (Fragment)	9	8	8	8	3	4	5	3	4	6	3	4	5	3	4	6	3	4	5	3	4	6	28.4	28.4	28.4	39.589	349	349;366;352;244;235;46;56;97;170	0	43.222	9.7	14.6	18.3	13.2	14.3	23.5	236050000	6653800	1767100	66736000	46050000	34493000
A0A087X020;Q9Y3A5	A0A087X020;Q9Y3A5	3;3	3;3	3;3	Ribosome maturation protein SBDS	SBDS	Ribosome maturation protein SBDS;Ribosome maturation protein SBDS	2	3	3	3	2	0	3	0	0	1	2	0	3	0	0	1	2	0	3	0	0	1	14.8	14.8	14.8	28.864	250	250;250	0.00068027	5.2815	10.8	0	14.8	0	0	7.2	24011000	9238100	0	12130000	0	0
A0A087X054;Q9Y4L1;E9PJ21;A0A087WWI4;K7EQK2;Q9Y4L1-2;J3KTF1;J3QL06;Q9BST8;J3QQH7;J3QLE9;A0A087X214;A0A087WW13	A0A087X054;Q9Y4L1;E9PJ21;A0A087WWI4;K7EQK2;Q9Y4L1-2	29;29;20;20;20;17;9;8;5;5;5;3;3	29;29;20;20;20;17;9;8;5;5;5;3;3	29;29;20;20;20;17;9;8;5;5;5;3;3	Hypoxia up-regulated protein 1	HYOU1	Hypoxia up-regulated protein 1;Hypoxia up-regulated protein 1;Hypoxia up-regulated protein 1 (Fragment);Hypoxia up-regulated protein 1;Hypoxia up-regulated protein 1;Isoform 2 of Hypoxia up-regulated protein 1	13	29	29	29	5	2	5	22	25	27	5	2	5	22	25	27	5	2	5	22	25	27	43.8	43.8	43.8	104.78	937	937;999;656;677;678;559;224;211;147;149;154;92;102	0	244.28	10.4	4.2	9.4	35.2	37.9	42.4	590530000	13480000	4738700	21506000	157130000	197880000
A0A087X0R6;Q9UMY4-2;Q9UMY4;Q9UMY4-3	A0A087X0R6;Q9UMY4-2;Q9UMY4;Q9UMY4-3	3;3;3;2	2;2;2;2	2;2;2;2	Sorting nexin-12	SNX12	Sorting nexin-12;Isoform 2 of Sorting nexin-12;Sorting nexin-12;Isoform 3 of Sorting nexin-12	4	3	2	2	2	0	1	1	1	0	1	0	1	1	1	0	1	0	1	1	1	0	18.6	14.5	14.5	19.825	172	172;162;172;158	0.00071073	6.1252	10.5	0	6.4	6.4	8.1	0	15002000	6003700	0	3413600	5584900	0
A0A087X0S5;P12109	A0A087X0S5;P12109	11;11	11;11	11;11	Collagen alpha-1(VI) chain	COL6A1	Collagen alpha-1(VI) chain;Collagen alpha-1(VI) chain	2	11	11	11	9	7	8	0	0	0	9	7	8	0	0	0	9	7	8	0	0	0	16	16	16	108.34	1026	1026;1028	0	47.251	13	9.8	11.5	0	0	0	80842000	22119000	10658000	48065000	0	0
H0YJR8;A0A087X0Z7;H0YJ66;Q9Y394-2;Q9Y394	H0YJR8;A0A087X0Z7;H0YJ66;Q9Y394-2;Q9Y394	3;3;3;3;3	3;3;3;3;3	3;3;3;3;3	Dehydrogenase/reductase SDR family member 7	DHRS7	Dehydrogenase/reductase SDR family member 7 (Fragment);Dehydrogenase/reductase SDR family member 7;Dehydrogenase/reductase SDR family member 7 (Fragment);Isoform 2 of Dehydrogenase/reductase SDR family member 7;Dehydrogenase/reductase SDR family member 7	5	3	3	3	2	1	1	0	0	0	2	1	1	0	0	0	2	1	1	0	0	0	26.9	26.9	26.9	23.368	212	212;376;399;289;339	0	10.008	10.8	5.7	16	0	0	0	10594000	3579500	0	7014100	0	0
A0A0G2JN29;A0A087X117;Q15155;A0A0G2JP90;A0A087WW46;J3KN36;Q5JPE7-2;P69849;Q5JPE7;Q5JPE7-3;A0A087WTD5	A0A0G2JN29;A0A087X117;Q15155;A0A0G2JP90;A0A087WW46;J3KN36;Q5JPE7-2;P69849;Q5JPE7;Q5JPE7-3	7;7;7;6;6;6;6;6;6;5;1	7;7;7;6;6;6;6;6;6;5;1	7;7;7;6;6;6;6;6;6;5;1	Nodal modulator 1;Nodal modulator 2;Nodal modulator 3	NOMO1;NOMO3;NOMO2	Nodal modulator 1;Nodal modulator 1;Nodal modulator 1;Nodal modulator 1;Nodal modulator 1;Nodal modulator 3;Isoform 2 of Nodal modulator 2;Nodal modulator 3;Nodal modulator 2;Isoform 3 of Nodal modulator 2	11	7	7	7	3	1	4	4	2	4	3	1	4	4	2	4	3	1	4	4	2	4	10.1	10.1	10.1	139.54	1267	1267;1267;1222;1100;1100;1267;1222;1222;1267;1100;282	0	19.437	4.3	1.4	7.1	6.3	3.5	5.1	77446000	8138000	2979900	12587000	24780000	15316000
A0A087X142;A6NMH6;A6NFQ9;F8W8I8;Q92599-2;Q92599-4;Q92599;Q92599-3;C9J4G8;C9JV02	A0A087X142;A6NMH6;A6NFQ9;F8W8I8;Q92599-2;Q92599-4;Q92599;Q92599-3	5;5;5;5;5;5;5;3;1;1	4;4;4;4;4;4;4;2;1;1	4;4;4;4;4;4;4;2;1;1	Septin-8	SEPT8	Septin-8;Septin-8;Septin-8;Septin-8;Isoform 2 of Septin-8;Isoform 4 of Septin-8;Septin-8;Isoform 3 of Septin-8	10	5	4	4	0	0	0	1	1	3	0	0	0	1	1	2	0	0	0	1	1	2	21.8	17.4	17.4	49.355	426	426;430;440;460;429;442;483;369;97;130	0.00072254	6.4819	0	0	0	4.7	4.7	12.4	21722000	0	0	0	6257500	2677300
A0A087X163;Q9NP72;Q9NP72-2;Q5W0J0;Q9NP72-3;H0Y6T8	A0A087X163;Q9NP72;Q9NP72-2;Q5W0J0;Q9NP72-3	3;3;3;2;2;1	3;3;3;2;2;1	3;3;3;2;2;1	Ras-related protein Rab-18	RAB18	Ras-related protein Rab-18;Ras-related protein Rab-18;Isoform 2 of Ras-related protein Rab-18;Ras-related protein Rab-18;Isoform 3 of Ras-related protein Rab-18	6	3	3	3	2	0	2	0	0	1	2	0	2	0	0	1	2	0	2	0	0	1	21.4	21.4	21.4	20.42	182	182;206;235;161;142;291	0.0007657	7.8773	13.2	0	15.4	0	0	8.2	4788700	957820	0	3830900	0	0
A0A087X1A5;Q5JW30;O95793-2;O95793-3;O95793;Q5JW28;F6UDC6	A0A087X1A5;Q5JW30;O95793-2;O95793-3;O95793;Q5JW28	4;4;4;4;4;2;1	4;4;4;4;4;2;1	4;4;4;4;4;2;1	Double-stranded RNA-binding protein Staufen homolog 1	STAU1	Double-stranded RNA-binding protein Staufen homolog 1;Double-stranded RNA-binding protein Staufen homolog 1;Isoform Short of Double-stranded RNA-binding protein Staufen homolog 1;Isoform 3 of Double-stranded RNA-binding protein Staufen homolog 1;Double-str	7	4	4	4	1	0	0	2	0	2	1	0	0	2	0	2	1	0	0	2	0	2	9.9	9.9	9.9	54.945	493	493;494;496;502;577;199;129	0	10.946	2	0	0	5.5	0	4.5	9043200	1218600	0	0	3627700	0
E9PPY7;E9PRV8;A0A087X1E4;P53365-3;P53365	E9PPY7;E9PRV8;A0A087X1E4;P53365-3;P53365	1;1;1;1;1	1;1;1;1;1	1;1;1;1;1	Arfaptin-2	ARFIP2	Arfaptin-2;Arfaptin-2;Arfaptin-2;Isoform 3 of Arfaptin-2;Arfaptin-2	5	1	1	1	0	0	0	1	1	1	0	0	0	1	1	1	0	0	0	1	1	1	10.7	10.7	10.7	17.41	159	159;202;374;303;341	0.00072569	6.6771	0	0	0	10.7	10.7	10.7	21707000	0	0	0	12325000	6397300
A0A087X1I8;Q7Z3E5;Q7Z3E5-2;C9JW07	A0A087X1I8;Q7Z3E5;Q7Z3E5-2;C9JW07	4;4;3;2	4;4;3;2	4;4;3;2	LisH domain-containing protein ARMC9	ARMC9	LisH domain-containing protein ARMC9;LisH domain-containing protein ARMC9;Isoform 2 of LisH domain-containing protein ARMC9;LisH domain-containing protein ARMC9 (Fragment)	4	4	4	4	0	0	1	3	2	1	0	0	1	3	2	1	0	0	1	3	2	1	9.5	9.5	9.5	91.818	818	818;817;665;166	0.00072516	6.6651	0	0	3.4	6.1	2.9	1.1	22065000	0	0	2361900	13505000	5399200
A0A087X1Z3;Q9UL46;H0YM70;H0YKU2	A0A087X1Z3;Q9UL46;H0YM70	11;11;10;3	11;11;10;3	11;11;10;3	Proteasome activator complex subunit 2	PSME2	Proteasome activator complex subunit 2;Proteasome activator complex subunit 2;Proteasome activator complex subunit 2	4	11	11	11	6	5	9	9	10	10	6	5	9	9	10	10	6	5	9	9	10	10	60.2	60.2	60.2	29.126	254	254;239;228;85	0	71.761	26.4	30.3	50.8	50.8	53.9	57.1	313400000	24330000	30932000	65555000	66324000	64255000
A0A087X2B5;P35613-4;P35613-2;P35613;I3L192;A0A087WUV8;P35613-3;R4GMX5;R4GN83	A0A087X2B5;P35613-4;P35613-2;P35613;I3L192;A0A087WUV8;P35613-3;R4GMX5	5;5;5;5;4;4;4;3;2	5;5;5;5;4;4;4;3;2	5;5;5;5;4;4;4;3;2	Basigin	BSG	Basigin (Fragment);Isoform 4 of Basigin;Isoform 2 of Basigin;Basigin;Basigin (Fragment);Basigin;Isoform 3 of Basigin;Basigin (Fragment)	9	5	5	5	4	4	3	4	3	3	4	4	3	4	3	3	4	4	3	4	3	3	39.8	39.8	39.8	23.896	221	221;205;269;385;160;189;176;84;52	0	33.427	32.6	32.6	26.2	33.5	26.2	26.2	201180000	36206000	28368000	47408000	41384000	22503000
A0A087X2D0;P84103-2;P84103	A0A087X2D0;P84103-2;P84103	3;3;3	2;2;2	2;2;2	Serine/arginine-rich splicing factor 3	SRSF3	Serine/arginine-rich-splicing factor 3;Isoform 2 of Serine/arginine-rich splicing factor 3;Serine/arginine-rich splicing factor 3	3	3	2	2	2	2	2	3	3	3	1	1	1	2	2	2	1	1	1	2	2	2	32.6	17.9	17.9	10.32	95	95;124;164	0.00063492	4.0296	24.2	24.2	24.2	32.6	32.6	32.6	77981000	0	10099000	7824200	23097000	19066000
F1T0B3;A0A087X2G1;Q92499;Q92499-3;Q92499-2	F1T0B3;A0A087X2G1;Q92499;Q92499-3;Q92499-2	10;10;10;9;7	10;10;10;9;7	10;10;10;9;7	ATP-dependent RNA helicase DDX1	DDX1	ATP-dependent RNA helicase DDX1;ATP-dependent RNA helicase DDX1;ATP-dependent RNA helicase DDX1;Isoform 3 of ATP-dependent RNA helicase DDX1;Isoform 2 of ATP-dependent RNA helicase DDX1	5	10	10	10	5	3	6	5	5	4	5	3	6	5	5	4	5	3	6	5	5	4	23.8	23.8	23.8	73.915	659	659;659;740;612;622	0	28.809	13.4	7.4	14	11.7	11.4	10.5	129610000	30709000	7659800	23474000	28629000	17960000
A0A087X2I1;P62333;H0YJS8;H0YJC0;H0YJX2	A0A087X2I1;P62333	10;10;4;4;1	10;10;4;4;1	10;10;4;4;1	26S protease regulatory subunit 10B	PSMC6	26S proteasome regulatory subunit 10B;26S proteasome regulatory subunit 10B	5	10	10	10	8	4	6	6	5	5	8	4	6	6	5	5	8	4	6	6	5	5	38.7	38.7	38.7	45.796	403	403;389;194;262;67	0	86.557	32.8	19.4	26.6	23.6	21.6	21.6	188520000	44482000	14303000	40429000	31623000	23376000
A0A096LNH5;A0A0B4J2D5;A0A096LPI6;P30042;H7C2G3;A0A0B4J2H4;H7C1F6;P30042-2;A0A096LP73;F2Z2Q0;A0A096LP12;A0A096LNJ1	A0A096LNH5;A0A0B4J2D5;A0A096LPI6;P30042;H7C2G3;A0A0B4J2H4;H7C1F6;P30042-2;A0A096LP73;F2Z2Q0;A0A096LP12	4;4;4;4;3;3;3;3;2;2;2;1	4;4;4;4;3;3;3;3;2;2;2;1	4;4;4;4;3;3;3;3;2;2;2;1	ES1 protein homolog, mitochondrial	C21orf33	Uncharacterized protein;Uncharacterized protein;Uncharacterized protein (Fragment);ES1 protein homolog, mitochondrial;ES1 protein homolog, mitochondrial (Fragment);Uncharacterized protein;ES1 protein homolog, mitochondrial (Fragment);Isoform Short of ES1 p	12	4	4	4	1	0	1	4	2	2	1	0	1	4	2	2	1	0	1	4	2	2	38.5	38.5	38.5	19.416	182	182;268;279;268;191;237;257;237;137;217;224;106	0	30.11	13.7	0	13.7	38.5	19.2	19.2	62747000	4180400	0	6308900	28768000	12670000
C9JFE4;A0A096LP07;A0A096LPJ3;A8K070;Q13098-5;Q13098;Q13098-7;J3QS84;J3QS88;J3KTB0;J3QLE8;J3QLT0;J3QL53;J3KRE8;J3KSA5;J3KRJ4;Q13098-6	C9JFE4;A0A096LP07;A0A096LPJ3;A8K070;Q13098-5;Q13098;Q13098-7;J3QS84;J3QS88;J3KTB0;J3QLE8;J3QLT0;J3QL53;J3KRE8;J3KSA5;J3KRJ4;Q13098-6	2;2;2;2;2;2;2;1;1;1;1;1;1;1;1;1;1	2;2;2;2;2;2;2;1;1;1;1;1;1;1;1;1;1	2;2;2;2;2;2;2;1;1;1;1;1;1;1;1;1;1	COP9 signalosome complex subunit 1	GPS1	COP9 signalosome complex subunit 1;COP9 signalosome complex subunit 1;COP9 signalosome complex subunit 1;COP9 signalosome complex subunit 1;Isoform 4 of COP9 signalosome complex subunit 1;COP9 signalosome complex subunit 1;Isoform 2 of COP9 signalosome com	17	2	2	2	0	1	1	0	0	0	0	1	1	0	0	0	0	1	1	0	0	0	4.7	4.7	4.7	53.371	471	471;486;490;526;487;491;527;101;134;139;166;168;168;186;210;253;549	0.0042067	3.1589	0	2.5	2.1	0	0	0	1731100	0	0	1731100	0	0
A8MQT7;A0A096LP69;H7C2F2;P14209-2;P14209-3;P14209	A8MQT7;A0A096LP69;H7C2F2;P14209-2;P14209-3;P14209	2;2;2;2;2;2	2;2;2;2;2;2	2;2;2;2;2;2	CD99 antigen	CD99	CD99 antigen;CD99 antigen;CD99 antigen (Fragment);Isoform II of CD99 antigen;Isoform 3 of CD99 antigen;CD99 antigen	6	2	2	2	0	0	0	1	1	2	0	0	0	1	1	2	0	0	0	1	1	2	36.7	36.7	36.7	17.694	177	177;184;201;160;169;185	0.00069396	5.6541	0	0	0	17.5	17.5	36.7	11143000	0	0	0	5822000	2185800
C9JP00;A0A0A0MQX8;Q9NR56-3;Q9NR56-4;Q9NR56-7;Q9NR56-6;Q9NR56-2;Q9NR56-5;Q9NR56;H7C4T5;C9JCX1;H7C4Y1;O95205;Q86VM6;Q5VZF2-3;Q5VZF2-2;Q5VZF2	C9JP00;A0A0A0MQX8;Q9NR56-3;Q9NR56-4;Q9NR56-7;Q9NR56-6;Q9NR56-2;Q9NR56-5;Q9NR56;H7C4T5;C9JCX1;H7C4Y1;O95205;Q86VM6;Q5VZF2-3;Q5VZF2-2;Q5VZF2	4;4;4;4;4;4;4;4;4;3;2;2;2;2;2;2;2	4;4;4;4;4;4;4;4;4;3;2;2;2;2;2;2;2	4;4;4;4;4;4;4;4;4;3;2;2;2;2;2;2;2	Muscleblind-like protein 1;Muscleblind-like protein 2	MBNL1;MBLL;MBNL2	Muscleblind-like protein 1;Muscleblind-like protein 1;Isoform 3 of Muscleblind-like protein 1;Isoform 4 of Muscleblind-like protein 1;Isoform 7 of Muscleblind-like protein 1;Isoform 6 of Muscleblind-like protein 1;Isoform 2 of Muscleblind-like protein 1;Is	17	4	4	4	0	0	0	2	2	2	0	0	0	2	2	2	0	0	0	2	2	2	15.2	15.2	15.2	37.898	348	348;400;302;314;340;342;370;382;388;329;155;210;255;343;361;367;373	0.00069109	5.5746	0	0	0	5.7	5.5	9.8	30520000	0	0	0	11603000	11883000
A0A0A0MR02;P45880;P45880-2;P45880-1;Q5JSD2;Q5JSD1;A2A3S1	A0A0A0MR02;P45880;P45880-2;P45880-1;Q5JSD2;Q5JSD1	10;10;9;9;6;6;3	10;10;9;9;6;6;3	10;10;9;9;6;6;3	Voltage-dependent anion-selective channel protein 2	VDAC2	Voltage-dependent anion-selective channel protein 2 (Fragment);Voltage-dependent anion-selective channel protein 2;Isoform 2 of Voltage-dependent anion-selective channel protein 2;Isoform 1 of Voltage-dependent anion-selective channel protein 2;Voltage-dep	7	10	10	10	9	9	10	9	9	8	9	9	10	9	9	8	9	9	10	9	9	8	55	55	55	30.348	282	282;294;283;309;194;204;109	0	156.96	50.4	47.5	55	51.1	50.4	42.9	507390000	86094000	73976000	128540000	74558000	59760000
Q5T092;A0A0A0MR06;Q5T091;O15258;Q5T093	Q5T092;A0A0A0MR06;Q5T091;O15258;Q5T093	4;4;4;4;3	4;4;4;4;3	4;4;4;4;3	Protein RER1	RER1	Protein RER1 (Fragment);Protein RER1 (Fragment);Protein RER1;Protein RER1;Protein RER1	5	4	4	4	2	1	3	1	2	3	2	1	3	1	2	3	2	1	3	1	2	3	30.4	30.4	30.4	18.388	158	158;177;187;196;117	0	15.75	18.4	7	26.6	7	19	19	34024000	11276000	2059500	6793800	2354400	6428200
A0A0A0MR66;P98175-4;P98175-3;P98175-2;P98175	A0A0A0MR66;P98175-4;P98175-3;P98175-2;P98175	1;1;1;1;1	1;1;1;1;1	1;1;1;1;1	RNA-binding protein 10	RBM10	RNA binding motif protein 10, isoform CRA_d;Isoform 4 of RNA-binding protein 10;Isoform 3 of RNA-binding protein 10;Isoform 2 of RNA-binding protein 10;RNA-binding protein 10	5	1	1	1	0	0	0	0	0	1	0	0	0	0	0	1	0	0	0	0	0	1	1.5	1.5	1.5	110.36	995	995;852;853;929;930	0.0041642	3.0045	0	0	0	0	0	1.5	0	0	0	0	0	0
A0A0A0MRA5;B7Z4B8;Q9BUJ2-3;Q9BUJ2-4;Q9BUJ2-2;Q9BUJ2;M0QYZ0;M0R3F1;M0R0K8;M0R203;M0QZV6;M0QYM5;M0QYI8	A0A0A0MRA5;B7Z4B8;Q9BUJ2-3;Q9BUJ2-4;Q9BUJ2-2;Q9BUJ2;M0QYZ0;M0R3F1	8;8;8;8;8;8;6;6;3;2;2;1;1	8;8;8;8;8;8;6;6;3;2;2;1;1	8;8;8;8;8;8;6;6;3;2;2;1;1	Heterogeneous nuclear ribonucleoprotein U-like protein 1	HNRNPUL1	Heterogeneous nuclear ribonucleoprotein U-like protein 1;Heterogeneous nuclear ribonucleoprotein U-like protein 1;Isoform 3 of Heterogeneous nuclear ribonucleoprotein U-like protein 1;Isoform 4 of Heterogeneous nuclear ribonucleoprotein U-like protein 1;Is	13	8	8	8	2	0	2	4	6	6	2	0	2	4	6	6	2	0	2	4	6	6	15.7	15.7	15.7	85.939	766	766;767;752;756;804;856;371;641;158;81;118;90;172	0	31.816	4.8	0	4.8	7.3	12.1	12	69408000	8227600	0	10275000	5815900	23571000
A0A0A0MRI2;Q9UNH7-2;Q9UNH7;G3V5X9	A0A0A0MRI2;Q9UNH7-2;Q9UNH7;G3V5X9	2;2;2;1	2;2;2;1	2;2;2;1	Sorting nexin-6;Sorting nexin-6, N-terminally processed	SNX6	Sorting nexin;Isoform 2 of Sorting nexin-6;Sorting nexin-6;Sorting nexin-6 (Fragment)	4	2	2	2	0	0	2	0	0	0	0	0	2	0	0	0	0	0	2	0	0	0	6.5	6.5	6.5	47.804	418	418;290;406;239	0.00070077	5.8632	0	0	6.5	0	0	0	3072300	0	0	3072300	0	0
F6S8N6;A0A0A0MRJ6;H7BY58;P22061;P22061-2;C9J0F2;F8WDT3;F8WAV5;F8WAX2	F6S8N6;A0A0A0MRJ6;H7BY58;P22061;P22061-2	6;6;6;6;6;1;1;1;1	6;6;6;6;6;1;1;1;1	6;6;6;6;6;1;1;1;1	Protein-L-isoaspartate O-methyltransferase;Protein-L-isoaspartate(D-aspartate) O-methyltransferase	PCMT1	Protein-L-isoaspartate(D-aspartate) O-methyltransferase;Protein-L-isoaspartate O-methyltransferase;Protein-L-isoaspartate O-methyltransferase;Protein-L-isoaspartate(D-aspartate) O-methyltransferase;Isoform 2 of Protein-L-isoaspartate(D-aspartate) O-methylt	9	6	6	6	4	5	6	3	2	3	4	5	6	3	2	3	4	5	6	3	2	3	39.2	39.2	39.2	26.626	250	250;285;286;227;228;96;120;124;130	0	62.518	31.6	35.2	39.2	27.2	21.2	27.2	249320000	40590000	27266000	102570000	26162000	28165000
A0A0A0MRV0;Q9P2E9-2;Q9P2E9;Q9P2E9-3;A0A087WVV2;F8W7S5;A0A087WU26;A2A2S5;V9GY78;E9PN67;Q8N4C6-6	A0A0A0MRV0;Q9P2E9-2;Q9P2E9;Q9P2E9-3;A0A087WVV2;F8W7S5	39;39;39;38;34;32;14;5;1;1;1	39;39;39;38;34;32;14;5;1;1;1	38;38;38;37;33;31;14;5;1;0;0	Ribosome-binding protein 1	RRBP1	Ribosome-binding protein 1;Isoform 1 of Ribosome-binding protein 1;Ribosome-binding protein 1;Isoform 2 of Ribosome-binding protein 1;Ribosome-binding protein 1;Ribosome-binding protein 1	11	39	39	38	15	13	15	32	31	33	15	13	15	32	31	33	15	13	15	31	31	32	34.8	34.8	34.1	152.45	1410	1410;1407;1410;977;934;751;346;300;229;1989;1275	0	323.31	15.1	14	15.7	29.4	29	31.2	1781500000	142360000	42465000	57494000	616820000	472330000
X6RA56;A0A0A0MRV8;X6RLR1;O75935-3;O75935-2;O75935	X6RA56;A0A0A0MRV8;X6RLR1;O75935-3;O75935-2;O75935	1;1;1;1;1;1	1;1;1;1;1;1	1;1;1;1;1;1	Dynactin subunit 3	DCTN3	Dynactin subunit 3;Dynactin subunit 3 (Fragment);Dynactin subunit 3;Isoform 3 of Dynactin subunit 3;Isoform 2 of Dynactin subunit 3;Dynactin subunit 3	6	1	1	1	1	0	1	0	0	0	1	0	1	0	0	0	1	0	1	0	0	0	6.3	6.3	6.3	16.091	142	142;160;176;158;176;186	1	-2	6.3	0	6.3	0	0	0	0	0	0	0	0	0
C9JHF5;A0A0A0MS29;Q9GZY8-4;Q9GZY8-5;Q9GZY8-3;Q9GZY8-2;Q9GZY8	C9JHF5;A0A0A0MS29;Q9GZY8-4;Q9GZY8-5;Q9GZY8-3;Q9GZY8-2;Q9GZY8	2;2;2;2;2;2;2	2;2;2;2;2;2;2	2;2;2;2;2;2;2	Mitochondrial fission factor	MFF	Mitochondrial fission factor (Fragment);Mitochondrial fission factor;Isoform 4 of Mitochondrial fission factor;Isoform 5 of Mitochondrial fission factor;Isoform 3 of Mitochondrial fission factor;Isoform 2 of Mitochondrial fission factor;Mitochondrial fissi	7	2	2	2	1	0	1	1	0	1	1	0	1	1	0	1	1	0	1	1	0	1	23.2	23.2	23.2	15.627	138	138;221;218;238;243;291;342	0.00063939	4.1267	13	0	10.1	10.1	0	10.1	5017800	3843200	0	0	0	0
A0A0A0MS41;A0A1P0AYU5;Q9BWM7	A0A0A0MS41;A0A1P0AYU5;Q9BWM7	2;2;2	2;2;2	2;2;2	Sideroflexin;Sideroflexin-3	SFXN3	Sideroflexin;Sideroflexin;Sideroflexin-3	3	2	2	2	2	2	2	0	0	0	2	2	2	0	0	0	2	2	2	0	0	0	8.7	8.7	8.7	35.503	321	321;325;321	0.00071582	6.3218	8.7	8.7	8.7	0	0	0	23976000	11734000	1599700	10643000	0	0
A0A0A0MS99;I3L4X2;P33527-4;P33527;P33527-9;P33527-6;P33527-7;P33527-2;P33527-3	A0A0A0MS99;I3L4X2;P33527-4;P33527;P33527-9;P33527-6;P33527-7;P33527-2;P33527-3	2;2;2;2;2;1;1;1;1	2;2;2;2;2;1;1;1;1	2;2;2;2;2;1;1;1;1	Multidrug resistance-associated protein 1	ABCC1	Multidrug resistance-associated protein 1;Multidrug resistance-associated protein 1 (Fragment);Isoform 4 of Multidrug resistance-associated protein 1;Multidrug resistance-associated protein 1;Isoform 9 of Multidrug resistance-associated protein 1;Isoform 6	9	2	2	2	0	0	0	1	2	0	0	0	0	1	2	0	0	0	0	1	2	0	3.5	3.5	3.5	134.99	1215	1215;1440;1466;1531;1541;1407;1410;1472;1475	0.000757	7.6546	0	0	0	1.5	3.5	0	6188600	0	0	0	0	6188600
A0A1W2PNM1;A0A0A0MSE2;A0A0D9SFP2;E9PF18;Q16836;Q16836-3;Q16836-2;A0A1W2PQ78;A0A1W2PQC2;A0A1W2PRT2;A0A1W2PQV5	A0A1W2PNM1;A0A0A0MSE2;A0A0D9SFP2;E9PF18;Q16836;Q16836-3;Q16836-2;A0A1W2PQ78	3;3;3;3;3;3;3;2;1;1;1	3;3;3;3;3;3;3;2;1;1;1	3;3;3;3;3;3;3;2;1;1;1	Hydroxyacyl-coenzyme A dehydrogenase, mitochondrial	HADH	Hydroxyacyl-coenzyme A dehydrogenase, mitochondrial (Fragment);Hydroxyacyl-coenzyme A dehydrogenase, mitochondrial;Hydroxyacyl-coenzyme A dehydrogenase, mitochondrial;Hydroxyacyl-coenzyme A dehydrogenase, mitochondrial;Hydroxyacyl-coenzyme A dehydrogenase,	11	3	3	3	2	1	2	1	1	3	2	1	2	1	1	3	2	1	2	1	1	3	22.5	22.5	22.5	29.096	267	267;317;318;390;314;331;390;176;165;183;245	0	13.728	14.2	9	14.2	9	9	22.5	117520000	25738000	11604000	34975000	10008000	12256000
J3KNW4;A0A0A0MSG2;Q14192	J3KNW4;A0A0A0MSG2;Q14192	1;1;1	1;1;1	1;1;1	Four and a half LIM domains protein 2	FHL2	Four and a half LIM domains protein 2;Four and a half LIM domains protein 2;Four and a half LIM domains protein 2	3	1	1	1	0	0	1	1	1	1	0	0	1	1	1	1	0	0	1	1	1	1	4.4	4.4	4.4	44.205	389	389;395;279	0.00065617	4.5465	0	0	4.4	4.4	4.4	4.4	2941800	0	0	1645400	0	0
A0A0A0MSK3;Q53F23;A0A0C4DH47;P24557-4;P24557-2;P24557;P24557-3	A0A0A0MSK3;Q53F23;A0A0C4DH47;P24557-4;P24557-2;P24557;P24557-3	3;3;3;3;3;3;3	3;3;3;3;3;3;3	3;3;3;3;3;3;3	Thromboxane-A synthase	TBXAS1	HCG14925, isoform CRA_b;HCG14925, isoform CRA_a (Fragment);Thromboxane-A synthase;Isoform 4 of Thromboxane-A synthase;Isoform 2 of Thromboxane-A synthase;Thromboxane-A synthase;Isoform 3 of Thromboxane-A synthase	7	3	3	3	0	0	0	3	2	2	0	0	0	3	2	2	0	0	0	3	2	2	11.5	11.5	11.5	52.417	460	460;534;580;459;466;533;579	0	9.1394	0	0	0	11.5	8.9	8.9	27549000	0	0	0	9330000	7097000
A0A0A0MSK5;J3KN66;Q5JTV8;Q5JTV8-3;H0YDU3;H0YD16;Q5JTV8-2;H0Y4R4	A0A0A0MSK5;J3KN66;Q5JTV8;Q5JTV8-3;H0YDU3;H0YD16;Q5JTV8-2	3;3;3;3;2;2;2;1	3;3;3;3;2;2;2;1	3;3;3;3;2;2;2;1	Torsin-1A-interacting protein 1	TOR1AIP1	Torsin-1A-interacting protein 1;Torsin-1A-interacting protein 1;Torsin-1A-interacting protein 1;Isoform 3 of Torsin-1A-interacting protein 1;Torsin-1A-interacting protein 1 (Fragment);Torsin-1A-interacting protein 1 (Fragment);Isoform 2 of Torsin-1A-intera	8	3	3	3	0	0	0	2	2	3	0	0	0	2	2	3	0	0	0	2	2	3	11.9	11.9	11.9	52.406	462	462;599;583;584;193;198;379;296	0.00074294	7.1276	0	0	0	6.5	6.5	11.9	19233000	0	0	0	3562300	3941400
A0A0A0MSQ0;P13797-2;P13797;P13797-3;P13796;H7C4N2;U3KQI3;Q5TBN3;Q14651;C9JAM8	A0A0A0MSQ0;P13797-2;P13797;P13797-3	26;26;26;25;8;7;6;4;3;2	26;26;26;25;8;7;6;4;3;2	26;26;26;25;8;7;6;4;3;2	Plastin-3	PLS3	Plastin-3;Isoform 2 of Plastin-3;Plastin-3;Isoform 3 of Plastin-3	10	26	26	26	23	20	19	17	17	17	23	20	19	17	17	17	23	20	19	17	17	17	53.2	53.2	53.2	69.334	617	617;617;630;585;627;190;164;246;629;266	0	168.27	46.5	40.5	41	35.2	36.5	37.8	688080000	162520000	80750000	153120000	107830000	76804000
A0A0A0MSR2;E7EV99;E7ENY0;P35611-5;P35611-2;P35611-6;P35611-4;P35611;P35611-3;D6RAH3;H0Y9H2	A0A0A0MSR2;E7EV99;E7ENY0;P35611-5;P35611-2;P35611-6;P35611-4;P35611;P35611-3	3;3;3;3;3;3;3;3;3;1;1	3;3;3;3;3;3;3;3;3;1;1	3;3;3;3;3;3;3;3;3;1;1	Alpha-adducin	ADD1	Alpha-adducin;Alpha-adducin;Alpha-adducin;Isoform 5 of Alpha-adducin;Isoform 2 of Alpha-adducin;Isoform 6 of Alpha-adducin;Isoform 4 of Alpha-adducin;Alpha-adducin;Isoform 3 of Alpha-adducin	11	3	3	3	1	1	3	1	0	0	1	1	3	1	0	0	1	1	3	1	0	0	13.5	13.5	13.5	43.99	400	400;632;663;511;631;662;662;737;768;137;444	0	13.858	4.5	4.5	13.5	4.5	0	0	42670000	6639000	3875600	28000000	4154600	0
A0A0A0MSS8;P42330;S4R3Z2;P42330-2;S4R3D5;P17516	A0A0A0MSS8;P42330;S4R3Z2;P42330-2	20;20;19;11;9;5	12;12;11;7;5;0	12;12;11;7;5;0	Aldo-keto reductase family 1 member C3	AKR1C3	Aldo-keto reductase family 1 member C3;Aldo-keto reductase family 1 member C3;Aldo-keto reductase family 1 member C3;Isoform 2 of Aldo-keto reductase family 1 member C3	6	20	12	12	8	6	5	19	20	18	3	2	2	11	12	10	3	2	2	11	12	10	75.5	55.7	55.7	36.867	323	323;323;300;204;155;323	0	197.7	35.3	26.6	23.8	65.9	75.5	65.9	1157100000	24299000	5111200	22350000	300950000	381520000
C9JRP1;A0A0A0MST8;E9PFN4;Q9Y6M7-2;Q9Y6M7-9;Q9Y6M7-6;Q9Y6M7-13;Q9Y6M7-12;Q9Y6M7;Q9Y6M7-8;Q9Y6M7-7;Q9Y6M7-4;Q9Y6M7-3;Q9Y6M7-11;Q9Y6M7-14;Q9Y6M7-10;H7C3C4;Q9Y6M7-5	C9JRP1;A0A0A0MST8;E9PFN4;Q9Y6M7-2;Q9Y6M7-9;Q9Y6M7-6;Q9Y6M7-13;Q9Y6M7-12;Q9Y6M7;Q9Y6M7-8;Q9Y6M7-7;Q9Y6M7-4;Q9Y6M7-3;Q9Y6M7-11;Q9Y6M7-14;Q9Y6M7-10;H7C3C4;Q9Y6M7-5	8;8;8;8;8;8;8;8;8;8;8;6;6;5;5;5;4;4	8;8;8;8;8;8;8;8;8;8;8;6;6;5;5;5;4;4	8;8;8;8;8;8;8;8;8;8;8;6;6;5;5;5;4;4	Anion exchange protein;Sodium bicarbonate cotransporter 3	SLC4A7	Anion exchange protein (Fragment);Anion exchange protein;Anion exchange protein;Isoform 2 of Sodium bicarbonate cotransporter 3;Isoform 9 of Sodium bicarbonate cotransporter 3;Isoform 6 of Sodium bicarbonate cotransporter 3;Isoform 13 of Sodium bicarbonate	18	8	8	8	0	0	0	4	6	6	0	0	0	4	6	6	0	0	0	4	6	6	12.4	12.4	12.4	118.46	1051	1051;1201;1210;1090;1095;1131;1135;1206;1214;1246;1259;1000;1018;463;467;574;801;800	0	25.212	0	0	0	6.1	10.3	8.7	73679000	0	0	0	21531000	29656000
A0A0G2JKZ1;A2AB90;A0A0G2JH37;A0A0A0MSV9;O15533-2;O15533;O15533-3;Q6P1N7;C9JA35;A0A0A0MT98;O15533-4	A0A0G2JKZ1;A2AB90;A0A0G2JH37;A0A0A0MSV9;O15533-2;O15533;O15533-3;Q6P1N7;C9JA35;A0A0A0MT98;O15533-4	4;4;4;4;4;4;4;2;2;2;2	4;4;4;4;4;4;4;2;2;2;2	4;4;4;4;4;4;4;2;2;2;2	Tapasin	TAPBP	Tapasin;Tapasin;Tapasin;Tapasin;Isoform 2 of Tapasin;Tapasin;Isoform 3 of Tapasin;TAPBP protein;Tapasin (Fragment);Tapasin;Isoform 4 of Tapasin	11	4	4	4	0	0	0	2	2	4	0	0	0	2	2	4	0	0	0	2	2	4	13.6	13.6	13.6	47.606	448	448;466;466;504;412;448;504;156;192;361;361	0.000777	8.1483	0	0	0	8.3	5.4	13.6	85219000	0	0	0	41007000	19660000
A0A0A0MSW4;P48739;P48739-2;P48739-3;B3KYB6;B3KYB7	A0A0A0MSW4;P48739;P48739-2;P48739-3;B3KYB6;B3KYB7	2;2;2;2;1;1	2;2;2;2;1;1	2;2;2;2;1;1	Phosphatidylinositol transfer protein beta isoform	PITPNB	Phosphatidylinositol transfer protein beta isoform;Phosphatidylinositol transfer protein beta isoform;Isoform 2 of Phosphatidylinositol transfer protein beta isoform;Isoform 3 of Phosphatidylinositol transfer protein beta isoform;Phosphatidylinositol trans	6	2	2	2	0	0	0	2	0	1	0	0	0	2	0	1	0	0	0	2	0	1	12.5	12.5	12.5	31.581	271	271;271;272;273;120;167	0.0079636	2.5489	0	0	0	12.5	0	3.7	10319000	0	0	0	10319000	0
A0A0A0MSZ9;Q05048;A3KFI9	A0A0A0MSZ9;Q05048;A3KFI9	2;2;1	2;2;1	2;2;1	Cleavage stimulation factor subunit 1	CSTF1	Cleavage stimulation factor subunit 1 (Fragment);Cleavage stimulation factor subunit 1;Cleavage stimulation factor subunit 1 (Fragment)	3	2	2	2	0	1	2	0	0	1	0	1	2	0	0	1	0	1	2	0	0	1	10.7	10.7	10.7	38.448	345	345;431;142	0.003621	3.222	0	6.1	10.7	0	0	6.1	10586000	0	1913900	3294900	0	0
E9PMP7;H0Y424;E9PMS6;A0A0A0MTE2;E9PMT2;F8WD26;J3KP06;Q8WWI1-3;Q8WWI1-5;Q8WWI1-4;Q8WWI1-2;Q8WWI1;H0YDQ3	E9PMP7;H0Y424;E9PMS6;A0A0A0MTE2;E9PMT2;F8WD26;J3KP06;Q8WWI1-3;Q8WWI1-5;Q8WWI1-4;Q8WWI1-2;Q8WWI1;H0YDQ3	2;2;2;2;2;2;2;2;2;2;2;2;1	2;2;2;2;2;2;2;2;2;2;2;2;1	2;2;2;2;2;2;2;2;2;2;2;2;1	LIM domain only protein 7	LMO7	LIM domain only protein 7 (Fragment);LIM domain only protein 7 (Fragment);LIM domain only protein 7;LIM domain only protein 7;LIM domain only protein 7;LIM domain only protein 7;LIM domain only protein 7;Isoform 3 of LIM domain only protein 7;Isoform 5 of	13	2	2	2	0	1	2	0	0	0	0	1	2	0	0	0	0	1	2	0	0	0	2.6	2.6	2.6	119.42	1045	1045;1055;1275;1385;1398;1631;1668;1349;1385;1614;1670;1683;292	0.0058651	2.8091	0	1.3	2.6	0	0	0	2661300	0	2661300	0	0	0
A0A0A0MTH3;Q13418-2;Q13418;Q13418-3;A0A087WWY6	A0A0A0MTH3;Q13418-2;Q13418;Q13418-3	6;6;6;4;2	6;6;6;4;2	6;6;6;4;2	Integrin-linked protein kinase	ILK	Integrin-linked protein kinase;Isoform 2 of Integrin-linked protein kinase;Integrin-linked protein kinase;Isoform 3 of Integrin-linked protein kinase	5	6	6	6	6	5	5	5	5	3	6	5	5	5	5	3	6	5	5	5	5	3	18.4	18.4	18.4	54.611	483	483;391;452;318;111	0	20.768	18.4	15.3	13	13	15.3	8.1	143660000	30721000	13244000	34425000	23104000	33455000
B8ZWD1;A0A0A0MTI5;P07108;P07108-3;P07108-2;P07108-4;P07108-5	B8ZWD1;A0A0A0MTI5;P07108;P07108-3;P07108-2;P07108-4;P07108-5	2;2;2;2;2;2;2	2;2;2;2;2;2;2	2;2;2;2;2;2;2	Acyl-CoA-binding protein	DBI	Acyl-CoA-binding protein;Acyl-CoA-binding protein;Acyl-CoA-binding protein;Isoform 3 of Acyl-CoA-binding protein;Isoform 2 of Acyl-CoA-binding protein;Isoform 4 of Acyl-CoA-binding protein;Isoform 5 of Acyl-CoA-binding protein	7	2	2	2	0	0	1	2	1	2	0	0	1	2	1	2	0	0	1	2	1	2	28.9	28.9	28.9	11.15	97	97;143;87;88;104;129;148	0.00069444	5.6565	0	0	8.2	28.9	8.2	28.9	22364000	0	0	1832600	11700000	5101600
A0A0R4J2G3;A0A0A0MTJ9;Q6PIU2;Q6PIU2-2;H7C046;Q6PIU2-3;F8WE33	A0A0R4J2G3;A0A0A0MTJ9;Q6PIU2;Q6PIU2-2;H7C046;Q6PIU2-3	10;10;10;10;7;7;1	10;10;10;10;7;7;1	10;10;10;10;7;7;1	Neutral cholesterol ester hydrolase 1	NCEH1	Arylacetamide deacetylase-like 1;Neutral cholesterol ester hydrolase 1;Neutral cholesterol ester hydrolase 1;Isoform 2 of Neutral cholesterol ester hydrolase 1;Neutral cholesterol ester hydrolase 1 (Fragment);Isoform 3 of Neutral cholesterol ester hydrolas	7	10	10	10	6	7	7	0	1	2	6	7	7	0	1	2	6	7	7	0	1	2	35.2	35.2	35.2	49.062	440	440;448;408;416;307;275;93	0	40.23	19.3	21.8	25.7	0	3.6	9.5	84686000	19352000	17583000	39094000	0	3812200
A0A0A0MTS2;P06744;P06744-2;K7EQ48;A0A0J9YXP8;A0A0J9YYH3;A0A0J9YX90;K7EPY4;K7EP41;K7ELR7;K7ENA0;K7ERC6;K7ERK8;K7EIL4;K7ESF4;Q8N196	A0A0A0MTS2;P06744;P06744-2;K7EQ48;A0A0J9YXP8;A0A0J9YYH3	28;28;27;23;14;14;13;8;7;5;5;4;3;2;2;1	28;28;27;23;14;14;13;8;7;5;5;4;3;2;2;1	28;28;27;23;14;14;13;8;7;5;5;4;3;2;2;1	Glucose-6-phosphate isomerase	GPI	Glucose-6-phosphate isomerase (Fragment);Glucose-6-phosphate isomerase;Isoform 2 of Glucose-6-phosphate isomerase;Glucose-6-phosphate isomerase;Glucose-6-phosphate isomerase (Fragment);Glucose-6-phosphate isomerase (Fragment)	16	28	28	28	19	20	18	23	23	22	19	20	18	23	23	22	19	20	18	23	23	22	71.2	71.2	71.2	64.824	573	573;558;569;474;268;283;279;166;159;146;162;161;133;110;209;739	0	323.31	53.9	54.1	46.9	55.3	63.4	61.1	3347800000	383880000	206690000	404460000	713960000	794710000
A0A0A0MTS7;Q8WZ42-5;Q8WZ42-11;Q8WZ42-4;Q8WZ42-7;Q8WZ42-2;Q8WZ42;Q8WZ42-8;Q8WZ42-13;Q8WZ42-12;A0A0A0MRA3;Q8WZ42-3;Q8WZ42-10;Q8WZ42-9;Q8WZ42-6	A0A0A0MTS7;Q8WZ42-5;Q8WZ42-11;Q8WZ42-4;Q8WZ42-7;Q8WZ42-2;Q8WZ42;Q8WZ42-8;Q8WZ42-13;Q8WZ42-12;A0A0A0MRA3;Q8WZ42-3;Q8WZ42-10;Q8WZ42-9	5;5;5;5;5;5;5;5;5;5;4;4;4;4;1	5;5;5;5;5;5;5;5;5;5;4;4;4;4;1	5;5;5;5;5;5;5;5;5;5;4;4;4;4;1	Titin	TTN	Titin;Isoform 5 of Titin;Isoform 11 of Titin;Isoform 4 of Titin;Isoform 7 of Titin;Isoform 2 of Titin;Titin;Isoform 8 of Titin;Isoform 13 of Titin;Isoform 12 of Titin;Titin;Isoform 3 of Titin;Isoform 10 of Titin;Isoform 9 of Titin	15	5	5	5	0	1	0	2	3	0	0	1	0	2	3	0	0	1	0	2	3	0	0.1	0.1	0.1	3994.6	35991	35991;32900;33423;33445;33615;34258;34350;34475;34484;35991;27118;26926;27051;27118;5604	0.00069156	5.5761	0	0	0	0.1	0.1	0	28842000	0	2455400	0	11573000	14813000
A0A0A6YYA0;Q86XR7-2;Q9Y3B3-2;Q9Y3B3;G3V2Y2	A0A0A6YYA0;Q86XR7-2;Q9Y3B3-2;Q9Y3B3	3;3;3;3;1	3;3;3;3;1	3;3;3;3;1	Transmembrane emp24 domain-containing protein 7	TMED7-TICAM2;TMED7	Protein TMED7-TICAM2;Isoform 2 of TIR domain-containing adapter molecule 2;Isoform 2 of Transmembrane emp24 domain-containing protein 7;Transmembrane emp24 domain-containing protein 7	5	3	3	3	2	3	2	1	2	2	2	3	2	1	2	2	2	3	2	1	2	2	21.8	21.8	21.8	21.233	188	188;404;188;224;81	0	13.982	15.4	21.8	15.4	5.3	15.4	15.4	55411000	9791600	13736000	12788000	0	8590900
A0A0B4J1W3;Q9BXJ9;Q9BXJ9-4	A0A0B4J1W3;Q9BXJ9;Q9BXJ9-4	3;3;2	3;3;2	3;3;2	N-alpha-acetyltransferase 15, NatA auxiliary subunit	NAA15	N-alpha-acetyltransferase 15, NatA auxiliary subunit;N-alpha-acetyltransferase 15, NatA auxiliary subunit;Isoform 2 of N-alpha-acetyltransferase 15, NatA auxiliary subunit	3	3	3	3	2	0	2	2	2	2	2	0	2	2	2	2	2	0	2	2	2	2	5.1	5.1	5.1	101.2	865	865;866;526	0.00078064	8.2425	2.7	0	2.7	3.9	3.9	2.7	12197000	733390	0	2724800	3587200	3933000
A0A0B4J1Z1;C9JAB2;Q16629-3;Q16629-2;Q16629-4;Q16629	A0A0B4J1Z1;C9JAB2;Q16629-3;Q16629-2;Q16629-4;Q16629	4;4;4;4;4;4	4;4;4;4;4;4	3;3;3;3;3;3	Serine/arginine-rich splicing factor 7	SRSF7	Serine/arginine-rich-splicing factor 7;Serine/arginine-rich-splicing factor 7;Isoform 3 of Serine/arginine-rich splicing factor 7;Isoform 2 of Serine/arginine-rich splicing factor 7;Isoform 4 of Serine/arginine-rich splicing factor 7;Serine/arginine-rich s	6	4	4	3	2	2	3	3	3	3	2	2	3	3	3	3	1	1	2	2	2	2	32.1	32.1	21.9	15.763	137	137;235;132;135;226;238	0	20.236	16.8	16.8	23.4	25.5	25.5	25.5	207810000	35562000	16931000	32296000	34012000	45747000
Q5W0H4;A0A0B4J2C3;P13693;J3KPG2;E9PJF7;P13693-2;H0YCX0;Q56UQ5	Q5W0H4;A0A0B4J2C3;P13693;J3KPG2;E9PJF7;P13693-2;H0YCX0	6;6;6;5;4;4;3;2	6;6;6;5;4;4;3;2	6;6;6;5;4;4;3;2	Translationally-controlled tumor protein	TPT1	Translationally-controlled tumor protein;Translationally-controlled tumor protein;Translationally-controlled tumor protein;Translationally-controlled tumor protein;Translationally-controlled tumor protein (Fragment);Isoform 2 of Translationally-controlled	8	6	6	6	6	6	6	6	6	4	6	6	6	6	6	4	6	6	6	6	6	4	40.4	40.4	40.4	21.525	188	188;197;172;160;162;138;77;140	0	119.97	40.4	40.4	40.4	40.4	40.4	33	709290000	143980000	93664000	172840000	107170000	93278000
A0A0C4DFM1;Q92544	A0A0C4DFM1;Q92544	1;1	1;1	1;1	Transmembrane 9 superfamily member 4	TM9SF4	Transmembrane 9 superfamily member;Transmembrane 9 superfamily member 4	2	1	1	1	1	1	1	0	0	0	1	1	1	0	0	0	1	1	1	0	0	0	3	3	3	72.54	625	625;642	0.00073855	7.065	3	3	3	0	0	0	21046000	5818300	5306000	9921900	0	0
A0A0C4DFW3;X6R3Q3;Q5VYS8-4;Q5VYS8-6;Q5VYS8	A0A0C4DFW3;X6R3Q3;Q5VYS8-4;Q5VYS8-6;Q5VYS8	2;1;1;1;1	2;1;1;1;1	2;1;1;1;1	Terminal uridylyltransferase 7	ZCCHC6	Terminal uridylyltransferase 7;Terminal uridylyltransferase 7;Isoform 4 of Terminal uridylyltransferase 7;Isoform 6 of Terminal uridylyltransferase 7;Terminal uridylyltransferase 7	5	2	2	2	0	0	0	2	1	1	0	0	0	2	1	1	0	0	0	2	1	1	5.6	5.6	5.6	46.138	395	395;784;1259;1457;1495	0.005848	2.7844	0	0	0	5.6	1.8	1.8	5693400	0	0	0	5693400	0
C9J9K3;A0A0C4DG17;P08865;F8WD59	C9J9K3;A0A0C4DG17;P08865	14;14;14;6	14;14;14;6	14;14;14;6	40S ribosomal protein SA	RPSA	40S ribosomal protein SA (Fragment);40S ribosomal protein SA;40S ribosomal protein SA	4	14	14	14	14	11	12	13	13	12	14	11	12	13	13	12	14	11	12	13	13	12	67.7	67.7	67.7	29.404	263	263;300;295;116	0	285.62	67.7	54	60.8	63.9	63.9	60.8	1629600000	295990000	154350000	292430000	291620000	276480000
E7ENN3;A0A0C4DG40;Q8NF91-8;Q8NF91-2;Q8NF91-4;Q8NF91	E7ENN3;A0A0C4DG40;Q8NF91-8;Q8NF91-2;Q8NF91-4;Q8NF91	1;1;1;1;1;1	1;1;1;1;1;1	1;1;1;1;1;1	Nesprin-1	SYNE1	Nesprin-1;Nesprin-1;Isoform 8 of Nesprin-1;Isoform 2 of Nesprin-1;Isoform 4 of Nesprin-1;Nesprin-1	6	1	1	1	1	1	0	1	1	1	1	1	0	1	1	1	1	1	0	1	1	1	0.1	0.1	0.1	964.83	8392	8392;8749;3212;3321;8749;8797	0.0079954	2.5836	0.1	0.1	0	0.1	0.1	0.1	455650000	43122000	19325000	0	120800000	134620000
A0A0C4DG44;O43464-2;O43464-3;O43464	A0A0C4DG44;O43464-2;O43464-3;O43464	1;1;1;1	1;1;1;1	1;1;1;1	Serine protease HTRA2, mitochondrial	HTRA2	Serine protease HTRA2, mitochondrial (Fragment);Isoform 2 of Serine protease HTRA2, mitochondrial;Isoform 3 of Serine protease HTRA2, mitochondrial;Serine protease HTRA2, mitochondrial	4	1	1	1	0	0	0	1	1	0	0	0	0	1	1	0	0	0	0	1	1	0	6.6	6.6	6.6	45.112	423	423;361;436;458	0.00077399	8.0618	0	0	0	6.6	6.6	0	5093500	0	0	0	2743600	2349900
A0A0C4DG89;Q7L014;D6RJA6	A0A0C4DG89;Q7L014	6;6;2	6;6;2	6;6;2	Probable ATP-dependent RNA helicase DDX46	DDX46	Probable ATP-dependent RNA helicase DDX46;Probable ATP-dependent RNA helicase DDX46	3	6	6	6	1	0	0	4	6	3	1	0	0	4	6	3	1	0	0	4	6	3	7.8	7.8	7.8	117.46	1032	1032;1031;471	0	24.061	1.6	0	0	5.6	7.8	3.8	27526000	0	0	0	6345900	11032000
H0YA55;A0A0C4DGB6;P02768;C9JKR2;D6RHD5;B7WNR0;P02768-2;A0A087WWT3;P02768-3;H7C013	H0YA55;A0A0C4DGB6;P02768;C9JKR2;D6RHD5;B7WNR0;P02768-2;A0A087WWT3;P02768-3	6;6;6;5;5;5;5;3;3;1	6;6;6;5;5;5;5;3;3;1	6;6;6;5;5;5;5;3;3;1	Serum albumin	ALB	Serum albumin (Fragment);Serum albumin;Serum albumin;Albumin, isoform CRA_k;Serum albumin;Serum albumin;Isoform 2 of Serum albumin;Serum albumin;Isoform 3 of Serum albumin	10	6	6	6	4	5	4	2	2	3	4	5	4	2	2	3	4	5	4	2	2	3	13.4	13.4	13.4	51.459	454	454;604;609;417;459;494;417;396;396;197	0	18.594	9.5	11	9.5	5.9	5.9	8.4	235510000	61670000	89698000	66219000	4535900	6746400
A0A0C4DGQ5;P04632;K7ELJ7;A0A075B7C0;K7EKD8;U3KQE2;K7EM73;K7EIV0;U3KPR7;K7ES78;K7EMQ1;Q96L46	A0A0C4DGQ5;P04632;K7ELJ7;A0A075B7C0;K7EKD8;U3KQE2;K7EM73;K7EIV0	11;11;10;8;8;7;7;7;4;2;2;2	11;11;10;8;8;7;7;7;4;2;2;2	11;11;10;8;8;7;7;7;4;2;2;2	Calpain small subunit 1	CAPNS1	Calpain small subunit 1;Calpain small subunit 1;Calpain small subunit 1;Calpain small subunit 1 (Fragment);Calpain small subunit 1;Calpain small subunit 1 (Fragment);Calpain small subunit 1 (Fragment);Calpain small subunit 1 (Fragment)	12	11	11	11	9	8	11	7	8	6	9	8	11	7	8	6	9	8	11	7	8	6	64.6	64.6	64.6	33.786	322	322;268;278;197;238;161;163;196;100;72;94;248	0	193.83	54.7	52.5	64.6	36.6	39.4	27.3	534300000	111080000	61441000	189630000	52160000	54461000
A0A0C4DGS1;P39656;P39656-2;P39656-3;U3KQ84	A0A0C4DGS1;P39656;P39656-2;P39656-3	13;13;12;12;6	13;13;12;12;6	13;13;12;12;6	Dolichyl-diphosphooligosaccharide--protein glycosyltransferase 48 kDa subunit	DDOST	Dolichyl-diphosphooligosaccharide--protein glycosyltransferase 48 kDa subunit;Dolichyl-diphosphooligosaccharide--protein glycosyltransferase 48 kDa subunit;Isoform 2 of Dolichyl-diphosphooligosaccharide--protein glycosyltransferase 48 kDa subunit;Isoform 3	5	13	13	13	10	9	10	11	9	11	10	9	10	11	9	11	10	9	10	11	9	11	49.2	49.2	49.2	48.799	439	439;456;419;438;154	0	132.78	35.8	33.3	35.5	41.7	30.3	40.5	722780000	80697000	48810000	247270000	102160000	123060000
A0A0C4DGZ6;H0YAV1;Q7LG56-2;Q7LG56;Q7LG56-6	A0A0C4DGZ6;H0YAV1;Q7LG56-2;Q7LG56;Q7LG56-6	3;3;3;3;3	3;3;3;3;3	2;2;2;2;2	Ribonucleoside-diphosphate reductase subunit M2 B	RRM2B	Ribonucleoside-diphosphate reductase subunit M2 B;Ribonucleoside-diphosphate reductase subunit M2 B (Fragment);Isoform 2 of Ribonucleoside-diphosphate reductase subunit M2 B;Ribonucleoside-diphosphate reductase subunit M2 B;Isoform 6 of Ribonucleoside-diph	5	3	3	2	0	2	1	0	0	0	0	2	1	0	0	0	0	1	1	0	0	0	16.8	16.8	11.8	34.488	297	297;408;299;351;423	0.00069061	5.569	0	8.8	8.1	0	0	0	6786800	0	2806900	3979900	0	0
A0A0D9SEM4;Q13247-3;Q13247;Q08170;B4DJK0;B4DUA4;Q13243-3;Q13243	A0A0D9SEM4;Q13247-3;Q13247;Q08170;B4DJK0;B4DUA4;Q13243-3;Q13243	2;2;2;2;1;1;1;1	2;2;2;2;1;1;1;1	2;2;2;2;1;1;1;1	Serine/arginine-rich splicing factor 6;Serine/arginine-rich splicing factor 4;Serine/arginine-rich splicing factor 5	SRSF4;SRSF6;SRSF5	Serine/arginine-rich-splicing factor 4 (Fragment);Isoform SRP55-3 of Serine/arginine-rich splicing factor 6;Serine/arginine-rich splicing factor 6;Serine/arginine-rich splicing factor 4;Serine/arginine-rich-splicing factor 5;Serine/arginine-rich-splicing f	8	2	2	2	2	2	1	0	1	0	2	2	1	0	1	0	2	2	1	0	1	0	5.6	5.6	5.6	43.647	378	378;335;344;494;124;138;269;272	0.00064725	4.3217	5.6	5.6	2.4	0	3.2	0	31929000	19347000	3599100	5848900	0	3134200
H7C3Z6;C9J840;E7EX83;A0A0D9SG62;H7C0P6;E7ENQ1;G3XAA2;H7C360;G5E948;E7EN19;A0A0D9SEY1;O95819-4;O95819-2;O95819;O95819-5;O95819-6;O95819-3	H7C3Z6;C9J840;E7EX83;A0A0D9SG62;H7C0P6;E7ENQ1;G3XAA2;H7C360;G5E948;E7EN19;A0A0D9SEY1;O95819-4;O95819-2;O95819;O95819-5;O95819-6;O95819-3	1;1;1;1;1;1;1;1;1;1;1;1;1;1;1;1;1	1;1;1;1;1;1;1;1;1;1;1;1;1;1;1;1;1	1;1;1;1;1;1;1;1;1;1;1;1;1;1;1;1;1	Mitogen-activated protein kinase kinase kinase kinase 4	MAP4K4	Mitogen-activated protein kinase kinase kinase kinase 4 (Fragment);Mitogen-activated protein kinase kinase kinase kinase 4;Mitogen-activated protein kinase kinase kinase kinase 4;Mitogen-activated protein kinase kinase kinase kinase 4;Mitogen-activated pro	17	1	1	1	0	0	1	1	0	0	0	0	1	1	0	0	0	0	1	1	0	0	6.6	6.6	6.6	31.124	258	258;987;1038;1044;1056;1154;1165;1170;1235;1272;1320;1165;1212;1239;1242;1273;1320	0.0058514	2.792	0	0	6.6	6.6	0	0	21092000	0	0	2587200	18505000	0
A0A0D9SFB3;A0A0D9SG12;A0A0D9SF53;O00571-2;O00571;O15523-2;O15523;A0A0J9YVQ7;C9J081;O15523-3;C9J8G5;A0A087WVZ1;A0A0J9YYH6;H0Y960;D6RCM4;Q9NQI0-3;Q9NQI0-2;Q9NQI0-4;Q9NQI0	A0A0D9SFB3;A0A0D9SG12;A0A0D9SF53;O00571-2;O00571;O15523-2;O15523	11;11;11;11;11;9;9;3;3;3;2;1;1;1;1;1;1;1;1	10;10;10;10;10;8;8;3;3;3;2;1;1;1;1;1;1;1;1	10;10;10;10;10;8;8;3;3;3;2;1;1;1;1;1;1;1;1	ATP-dependent RNA helicase DDX3X;ATP-dependent RNA helicase DDX3Y	DDX3X;DDX3Y	ATP-dependent RNA helicase DDX3X;ATP-dependent RNA helicase DDX3X;ATP-dependent RNA helicase DDX3X;Isoform 2 of ATP-dependent RNA helicase DDX3X;ATP-dependent RNA helicase DDX3X;Isoform 2 of ATP-dependent RNA helicase DDX3Y;ATP-dependent RNA helicase DDX3Y	19	11	10	10	9	8	8	7	6	7	8	7	7	6	5	6	8	7	7	6	5	6	24.5	22.8	22.8	70.839	640	640;647;733;646;662;657;660;164;250;291;224;138;164;305;518;575;690;704;724	0	68.122	17.3	17.7	17.5	13.9	11.2	13.9	242090000	48022000	28521000	87378000	36426000	20375000
A0A0D9SF63;Q9BZK7;A0A1B0GUU2;F8W9D8;C9IYU9;A0A1B0GVH3;C9JCW4;C9JLJ1;C9JTW8;C9JY82;C9JCK0;C9JBN1;C9JEC9;C9J3H2;C9J903;A0A0D9SEW5;A0A0D9SFS8;C9J7E1;A0A0D9SF25;Q9BQ87;O60907-2;O60907	A0A0D9SF63;Q9BZK7;A0A1B0GUU2;F8W9D8;C9IYU9;A0A1B0GVH3	4;4;2;2;2;2;1;1;1;1;1;1;1;1;1;1;1;1;1;1;1;1	4;4;2;2;2;2;1;1;1;1;1;1;1;1;1;1;1;1;1;1;1;1	4;4;2;2;2;2;1;1;1;1;1;1;1;1;1;1;1;1;1;1;1;1	F-box-like/WD repeat-containing protein TBL1XR1	TBL1XR1	F-box-like/WD repeat-containing protein TBL1XR1;F-box-like/WD repeat-containing protein TBL1XR1;F-box-like/WD repeat-containing protein TBL1XR1 (Fragment);F-box-like/WD repeat-containing protein TBL1XR1 (Fragment);F-box-like/WD repeat-containing protein TB	22	4	4	4	0	0	0	1	2	3	0	0	0	1	2	3	0	0	0	1	2	3	17.3	17.3	17.3	51.556	474	474;514;131;144;145;271;33;55;61;72;73;75;81;86;96;105;112;120;122;522;526;577	0	11.188	0	0	0	4.9	7.6	14.6	11936000	0	0	0	2121800	6452000
A0A0D9SFB1;A0A0U1RQP1;A0A0D9SFE4;Q05193-5;Q05193-3;Q05193-2;Q05193;A0A1B0GU67;A0A1B0GUX5	A0A0D9SFB1;A0A0U1RQP1;A0A0D9SFE4;Q05193-5;Q05193-3;Q05193-2;Q05193;A0A1B0GU67;A0A1B0GUX5	5;5;5;5;5;5;5;4;3	2;2;2;2;2;2;2;2;1	2;2;2;2;2;2;2;2;1	Dynamin-1	DNM1	Dynamin-1;Dynamin-1;Dynamin-1;Isoform 4 of Dynamin-1;Isoform 3 of Dynamin-1;Isoform 2 of Dynamin-1;Dynamin-1;Dynamin-1 (Fragment);Dynamin-1	9	5	2	2	2	2	4	2	1	2	0	0	2	0	0	0	0	0	2	0	0	0	6.6	3.2	3.2	94.016	835	835;856;864;851;851;864;864;356;320	0.00065189	4.4396	2	2.2	5.3	2.2	0.8	2	1368600	0	0	1368600	0	0
A0A0D9SFE1;E9PJH7;Q9H936;A0A0D9SFA8;K4DIB0;K4DIA2;A0A0D9SG84;E9PI74;E9PQ36;K4DIB6;K4DIB3;K4DIB8;K4DIA8;E9PS95;A0A0D9SEI9;Q9H1K4	A0A0D9SFE1;E9PJH7;Q9H936;A0A0D9SFA8;K4DIB0;K4DIA2;A0A0D9SG84;E9PI74;E9PQ36;K4DIB6;K4DIB3;K4DIB8;K4DIA8;E9PS95;A0A0D9SEI9;Q9H1K4	2;2;2;1;1;1;1;1;1;1;1;1;1;1;1;1	2;2;2;1;1;1;1;1;1;1;1;1;1;1;1;1	2;2;2;1;1;1;1;1;1;1;1;1;1;1;1;1	Mitochondrial glutamate carrier 1;Mitochondrial glutamate carrier 2	SLC25A22;SLC25A18	Mitochondrial glutamate carrier 1 (Fragment);Mitochondrial glutamate carrier 1 (Fragment);Mitochondrial glutamate carrier 1;Mitochondrial glutamate carrier 1 (Fragment);Mitochondrial glutamate carrier 1 (Fragment);Mitochondrial glutamate carrier 1 (Fragmen	16	2	2	2	0	0	0	0	1	1	0	0	0	0	1	1	0	0	0	0	1	1	11.3	11.3	11.3	26.214	247	247;313;323;97;103;114;117;127;134;156;161;177;190;196;197;315	0.00064809	4.326	0	0	0	0	3.2	8.1	2389300	0	0	0	0	0
Q30118;A0A0G2JH46;A0A0G2JMH6;P01903;A0A1W2PP70;Q08AS3;Q5Y7H0;A0A140TA34;P01906	Q30118;A0A0G2JH46;A0A0G2JMH6;P01903;A0A1W2PP70;Q08AS3;Q5Y7H0;A0A140TA34;P01906	2;2;2;2;1;1;1;1;1	2;2;2;2;1;1;1;1;1	2;2;2;2;1;1;1;1;1	HLA class II histocompatibility antigen, DR alpha chain;HLA class II histocompatibility antigen, DQ alpha 2 chain	HLA-DRA;HLA-DQA1;HLA-DQA2	HLA class II histocompatibility antigen, DR alpha chain;HLA class II histocompatibility antigen, DR alpha chain;HLA class II histocompatibility antigen, DR alpha chain;HLA class II histocompatibility antigen, DR alpha chain;HLA class II histocompatibility	9	2	2	2	1	1	2	0	0	0	1	1	2	0	0	0	1	1	2	0	0	0	12.7	12.7	12.7	25.859	229	229;229;254;254;190;254;255;255;255	0	9.8811	5.2	5.2	12.7	0	0	0	10652000	6476700	4175400	0	0	0
H9KV28;A0A140T8Z0;A0A0G2JH68;O60610-2;O60610-3;O60610	H9KV28;A0A140T8Z0;A0A0G2JH68;O60610-2;O60610-3;O60610	6;6;6;6;6;6	6;6;6;6;6;6	6;6;6;6;6;6	Protein diaphanous homolog 1	DIAPH1	Protein diaphanous homolog 1;Protein diaphanous homolog 1;Protein diaphanous homolog 1;Isoform 2 of Protein diaphanous homolog 1;Isoform 3 of Protein diaphanous homolog 1;Protein diaphanous homolog 1	6	6	6	6	3	0	3	3	1	2	3	0	3	3	1	2	3	0	3	3	1	2	7.1	7.1	7.1	136.85	1228	1228;1263;1272;1248;1263;1272	0	17.497	3.2	0	3.4	3.4	1.3	2	42823000	15395000	0	4742800	8108700	10680000
A0A0G2JIW1;P0DMV9;P0DMV8;P0DMV8-2;V9GZ37	A0A0G2JIW1;P0DMV9;P0DMV8;P0DMV8-2;V9GZ37	24;24;24;21;15	23;23;23;20;15	13;13;13;11;8	Heat shock 70 kDa protein 1B;Heat shock 70 kDa protein 1A	HSPA1B;HSPA1A	Heat shock 70 kDa protein 1B;Heat shock 70 kDa protein 1B;Heat shock 70 kDa protein 1A;Isoform 2 of Heat shock 70 kDa protein 1A;Heat shock 70 kDa protein 1A	5	24	23	13	9	9	11	22	21	19	8	8	10	21	20	18	5	4	6	13	11	9	57.3	55.3	33.6	70.108	642	642;641;641;586;476	0	242.96	20.4	20.9	30.5	51.7	53.6	49.5	1040700000	45609000	23764000	63333000	374730000	282400000
A2ACR1;A0A0G2JJA7;P28065-2;P28065;A2ACR0;A0A0G2JJQ0	A2ACR1;A0A0G2JJA7;P28065-2;P28065;A2ACR0;A0A0G2JJQ0	2;2;2;2;1;1	2;2;2;2;1;1	2;2;2;2;1;1	Proteasome subunit beta type;Proteasome subunit beta type-9	PSMB9	Proteasome subunit beta type;Proteasome subunit beta type;Isoform LMP2.S of Proteasome subunit beta type-9;Proteasome subunit beta type-9;Proteasome subunit beta type-9 (Fragment);Proteasome subunit beta type-9 (Fragment)	6	2	2	2	0	0	0	2	2	2	0	0	0	2	2	2	0	0	0	2	2	2	15.8	15.8	15.8	20.96	196	196;196;209;219;131;131	0.00074184	7.1103	0	0	0	15.8	15.8	15.8	30416000	0	0	0	15880000	2460300
A0A0G2JNZ5;A0A0G2JLB3;P04062-4;P04062-2;P04062;A0A0G2JNZ0;P04062-5	A0A0G2JNZ5;A0A0G2JLB3;P04062-4;P04062-2;P04062;A0A0G2JNZ0;P04062-5	2;2;2;2;2;1;1	2;2;2;2;2;1;1	2;2;2;2;2;1;1	Glucosylceramidase	GBA	Glucosylceramidase;Glucosylceramidase;Isoform 4 of Glucosylceramidase;Isoform Short of Glucosylceramidase;Glucosylceramidase;Glucosylceramidase;Isoform 5 of Glucosylceramidase	7	2	2	2	0	1	1	0	1	0	0	1	1	0	1	0	0	1	1	0	1	0	7.8	7.8	7.8	50.263	449	449;536;449;516;536;487;487	0.0041816	3.0435	0	1.8	6	0	6	0	9327500	0	3713400	3387700	0	2226400
B7Z683;A0A0G2JQ41;A0A1C7CYZ0;Q12979-4;Q12979-2;Q12979;I3L0R7;I3NI05;Q12979-3	B7Z683;A0A0G2JQ41;A0A1C7CYZ0;Q12979-4;Q12979-2;Q12979;I3L0R7;I3NI05;Q12979-3	2;2;2;2;2;2;1;1;1	2;2;2;2;2;2;1;1;1	2;2;2;2;2;2;1;1;1	Active breakpoint cluster region-related protein	ABR	Active breakpoint cluster region-related protein;Active breakpoint cluster region-related protein (Fragment);Active breakpoint cluster region-related protein;Isoform 4 of Active breakpoint cluster region-related protein;Isoform Short of Active breakpoint c	9	2	2	2	2	1	1	0	0	0	2	1	1	0	0	0	2	1	1	0	0	0	8	8	8	73.516	641	641;777;871;813;822;859;189;191;310	0.00063012	3.9177	8	5.3	2.7	0	0	0	12221000	8571700	3649700	0	0	0
A0A0G2JQK5;Q6DKJ4	A0A0G2JQK5;Q6DKJ4	2;2	2;2	2;2	Nucleoredoxin	NXN	Nucleoredoxin (Fragment);Nucleoredoxin	2	2	2	2	0	0	0	0	1	1	0	0	0	0	1	1	0	0	0	0	1	1	28.3	28.3	28.3	12.832	120	120;435	0.0036232	3.2224	0	0	0	0	8.3	20	0	0	0	0	0	0
A0A0J9YYL3;A0A0J9YXJ8;A0A0J9YVP6;A0A0J9YXX5;Q9UHX1-4;Q9UHX1-6;Q9UHX1-3;Q9UHX1-5;Q9UHX1-2;Q9UHX1;A0A0J9YVR6;E9PQ56;A0A0J9YWM1;H0YEM1;E9PMU7;E9PN18;E9PL19;H0YCP8	A0A0J9YYL3;A0A0J9YXJ8;A0A0J9YVP6;A0A0J9YXX5;Q9UHX1-4;Q9UHX1-6;Q9UHX1-3;Q9UHX1-5;Q9UHX1-2;Q9UHX1;A0A0J9YVR6;E9PQ56;A0A0J9YWM1;H0YEM1;E9PMU7;E9PN18	8;8;8;8;8;8;8;8;8;8;6;6;6;6;4;4;3;3	8;8;8;8;8;8;8;8;8;8;6;6;6;6;4;4;3;3	8;8;8;8;8;8;8;8;8;8;6;6;6;6;4;4;3;3	Poly(U)-binding-splicing factor PUF60	PUF60	Poly(U)-binding-splicing factor PUF60 (Fragment);Poly(U)-binding-splicing factor PUF60 (Fragment);Poly(U)-binding-splicing factor PUF60 (Fragment);Poly(U)-binding-splicing factor PUF60 (Fragment);Isoform 4 of Poly(U)-binding-splicing factor PUF60;Isoform 6	18	8	8	8	3	2	4	6	6	6	3	2	4	6	6	6	3	2	4	6	6	6	28.7	28.7	28.7	54.626	505	505;522;534;551;499;513;516;530;542;559;314;322;329;336;247;263;228;273	0	25.331	9.5	8.1	15.6	20	21.2	22.4	154290000	5528700	11722000	27798000	34356000	35334000
F6RP06;A0A0J9YW18;Q12983	F6RP06;A0A0J9YW18;Q12983	1;1;1	1;1;1	1;1;1	BCL2/adenovirus E1B 19 kDa protein-interacting protein 3	BNIP3	BCL2/adenovirus E1B 19 kDa protein-interacting protein 3 (Fragment);BCL2/adenovirus E1B 19 kDa protein-interacting protein 3 (Fragment);BCL2/adenovirus E1B 19 kDa protein-interacting protein 3	3	1	1	1	1	0	1	0	0	0	1	0	1	0	0	0	1	0	1	0	0	0	5.5	5.5	5.5	23.728	219	219;243;259	0.0080183	2.6011	5.5	0	5.5	0	0	0	1508300	1508300	0	0	0	0
C9JRD2;C9J2C4;C9JXB9;A0A0J9YX62;Q8NHS0;O75190-2;P25686-2;O75190-4;P25686;O75190-3;O75190	C9JRD2;C9J2C4;C9JXB9;A0A0J9YX62;Q8NHS0;O75190-2;P25686-2;O75190-4;P25686;O75190-3;O75190	1;1;1;1;1;1;1;1;1;1;1	1;1;1;1;1;1;1;1;1;1;1	1;1;1;1;1;1;1;1;1;1;1	DnaJ homolog subfamily B member 8;DnaJ homolog subfamily B member 6;DnaJ homolog subfamily B member 2	DNAJB2;DNAJB6;DNAJB8	DnaJ homolog subfamily B member 2 (Fragment);DnaJ homolog subfamily B member 6 (Fragment);DnaJ homolog subfamily B member 2 (Fragment);DnaJ homolog subfamily B member 6;DnaJ homolog subfamily B member 8;Isoform B of DnaJ homolog subfamily B member 6;Isofor	11	1	1	1	1	1	1	1	1	1	1	1	1	1	1	1	1	1	1	1	1	1	4.4	4.4	4.4	25.411	228	228;228;244;334;232;241;277;277;324;325;326	0.0058824	2.855	4.4	4.4	4.4	4.4	4.4	4.4	5731200	2843200	1324900	1563100	0	0
J3QT77;A0A0J9YYG4;A0A0J9YXF2;Q15165-3;Q15165-1;Q15165;A0A0J9YXU7;G3XAK4;A0A0J9YYJ1	J3QT77;A0A0J9YYG4;A0A0J9YXF2;Q15165-3;Q15165-1;Q15165;A0A0J9YXU7;G3XAK4	4;4;4;4;4;4;2;2;1	4;4;4;4;4;4;2;2;1	4;4;4;4;4;4;2;2;1	Serum paraoxonase/arylesterase 2	PON2	Serum paraoxonase/arylesterase 2;Serum paraoxonase/arylesterase 2;Paraoxonase 2, isoform CRA_a;Isoform 3 of Serum paraoxonase/arylesterase 2;Isoform 1 of Serum paraoxonase/arylesterase 2;Serum paraoxonase/arylesterase 2;Serum paraoxonase/arylesterase 2 (Fr	9	4	4	4	4	1	3	4	4	4	4	1	3	4	4	4	4	1	3	4	4	4	20.2	20.2	20.2	37.98	342	342;354;375;342;354;354;113;219;122	0	17.182	20.2	4.7	10.8	20.2	20.2	20.2	110320000	15969000	3527500	10880000	31651000	25951000
A0A0M3HER1;P48059;P48059-4;P48059-2;P48059-5;P48059-3;A0A0J9YXC7;Q7Z4I7-4;Q7Z4I7-3;Q7Z4I7;Q7Z4I7-5;Q7Z4I7-2;H0Y592	A0A0M3HER1;P48059;P48059-4;P48059-2;P48059-5;P48059-3;A0A0J9YXC7;Q7Z4I7-4;Q7Z4I7-3;Q7Z4I7;Q7Z4I7-5;Q7Z4I7-2	5;5;5;5;5;5;4;3;3;3;3;3;1	5;5;5;5;5;5;4;3;3;3;3;3;1	5;5;5;5;5;5;4;3;3;3;3;3;1	LIM and senescent cell antigen-like-containing domain protein 1;LIM and senescent cell antigen-like-containing domain protein 2	LIMS1;LIMS2	LIM and senescent cell antigen-like-containing domain protein 1 (Fragment);LIM and senescent cell antigen-like-containing domain protein 1;Isoform 4 of LIM and senescent cell antigen-like-containing domain protein 1;Isoform 2 of LIM and senescent cell anti	13	5	5	5	3	2	4	2	2	1	3	2	4	2	2	1	3	2	4	2	2	1	32.1	32.1	32.1	24.307	209	209;325;329;337;362;387;398;189;336;341;363;365;169	0	8.7206	16.3	11	26.8	11	11	5.7	48993000	7755200	5809100	19389000	4289400	5994200
A0A0R4J2E8;A8MXP9;P43243;D6REM6;D6R991;B3KM87;P43243-2;H0Y8T4;Q68E03;D6R8Z5;D6RBI2;D6RBK5;D6RE02;D6RIA2;D6RAM9;D6RAY2;D6RCM3;D6REK4	A0A0R4J2E8;A8MXP9;P43243;D6REM6;D6R991;B3KM87;P43243-2;H0Y8T4	16;16;16;13;9;9;9;8;3;2;2;2;2;2;1;1;1;1	16;16;16;13;9;9;9;8;3;2;2;2;2;2;1;1;1;1	16;16;16;13;9;9;9;8;3;2;2;2;2;2;1;1;1;1	Matrin-3	MATR3	Matrin-3;Matrin-3;Matrin-3;Matrin-3;Matrin-3 (Fragment);Matrin-3;Isoform 2 of Matrin-3;Matrin-3 (Fragment)	18	16	16	16	12	12	14	12	13	13	12	12	14	12	13	13	12	12	14	12	13	13	29.4	29.4	29.4	94.622	847	847;895;847;794;433;509;559;334;283;107;109;121;124;172;81;86;99;100	0	85.613	23.4	24.8	26	24	25.4	24.9	561770000	75400000	58555000	138980000	99051000	103950000
A0A0U1RQH7;G3XAC6;Q14498-3;Q14498-2;Q14498;H0Y4X3;A0A0U1RQW2;Q5QP23;Q5QP22	A0A0U1RQH7;G3XAC6;Q14498-3;Q14498-2;Q14498;H0Y4X3;A0A0U1RQW2;Q5QP23	4;4;4;4;4;3;2;2;1	4;4;4;4;4;3;2;2;1	4;4;4;4;4;3;2;2;1	RNA-binding protein 39	RBM39	RNA-binding protein 39 (Fragment);RNA-binding protein 39;Isoform 3 of RNA-binding protein 39;Isoform 2 of RNA-binding protein 39;RNA-binding protein 39;RNA-binding protein 39 (Fragment);RNA-binding protein 39 (Fragment);RNA-binding protein 39 (Fragment)	9	4	4	4	1	1	1	2	4	2	1	1	1	2	4	2	1	1	1	2	4	2	23.3	23.3	23.3	26.698	245	245;423;508;524;530;336;163;231;193	0	11.329	4.5	4.5	4.5	10.2	23.3	10.2	11568000	0	0	3246200	0	5112200
A0A0U1RQQ4;Q9UNN8	A0A0U1RQQ4;Q9UNN8	1;1	1;1	1;1	Endothelial protein C receptor	PROCR	Endothelial protein C receptor (Fragment);Endothelial protein C receptor	2	1	1	1	1	1	0	1	1	0	1	1	0	1	1	0	1	1	0	1	1	0	8	8	8	24.284	213	213;238	0.00066313	4.7393	8	8	0	8	8	0	11332000	5912100	0	0	5419600	0
A0A0U1RR32;A0A0U1RRH7;Q99878;Q96KK5;Q9BTM1;Q93077;Q7L7L0;P20671;P0C0S8;P04908;H0YFX9;Q9BTM1-2;Q71UI9-5	A0A0U1RR32;A0A0U1RRH7;Q99878;Q96KK5;Q9BTM1;Q93077;Q7L7L0;P20671;P0C0S8;P04908;H0YFX9;Q9BTM1-2	4;4;4;4;4;4;4;4;4;4;3;3;1	2;2;2;2;2;2;2;2;2;2;2;1;0	0;0;0;0;0;0;0;0;0;0;0;0;0	Histone H2A type 1-J;Histone H2A type 1-H;Histone H2A.J;Histone H2A type 1-C;Histone H2A type 3;Histone H2A type 1-D;Histone H2A type 1;Histone H2A type 1-B/E;Histone H2A	HIST1H2AJ;HIST1H2AH;H2AFJ;HIST1H2AC;HIST3H2A;HIST1H2AD;HIST1H2AG;HIST1H2AB	Histone H2A;Histone H2A;Histone H2A type 1-J;Histone H2A type 1-H;Histone H2A.J;Histone H2A type 1-C;Histone H2A type 3;Histone H2A type 1-D;Histone H2A type 1;Histone H2A type 1-B/E;Histone H2A (Fragment);Isoform 2 of Histone H2A.J	13	4	2	0	4	3	3	4	4	4	2	1	1	2	2	2	0	0	0	0	0	0	37.9	28.4	0	18.481	169	169;170;128;128;129;130;130;130;130;130;92;151;66	0	106.93	37.9	20.7	20.7	37.9	37.9	37.9	6081000000	666020000	346720000	760800000	1327500000	1128400000
A0A0U1RRM4;P26599;P26599-2;P26599-3;A6NLN1;K7EKJ7;A0A0D9SF20;K7EK45;A0A087WU68;K7ELW5;K7ES59;A0A087WUW5;O95758-1;O95758-6;O95758-2;O95758;O95758-5;O95758-4;X6R242;O95758-7	A0A0U1RRM4;P26599;P26599-2;P26599-3;A6NLN1	16;16;16;16;15;7;6;6;5;4;4;2;2;2;2;2;2;2;1;1	16;16;16;16;15;7;6;6;5;4;4;2;2;2;2;2;2;2;1;1	16;16;16;16;15;7;6;6;5;4;4;2;2;2;2;2;2;2;1;1	Polypyrimidine tract-binding protein 1	PTBP1	Polypyrimidine tract-binding protein 1;Polypyrimidine tract-binding protein 1;Isoform 2 of Polypyrimidine tract-binding protein 1;Isoform 3 of Polypyrimidine tract-binding protein 1;Polypyrimidine tract binding protein 1, isoform CRA_b	20	16	16	16	14	14	14	15	14	14	14	14	14	15	14	14	14	14	14	15	14	14	49	49	49	62.463	588	588;531;550;557;527;237;197;256;227;105;149;81;521;524;547;552;555;558;182;457	0	323.31	45.6	45.6	45.6	44.4	45.6	47.6	1457300000	211400000	111960000	215870000	260530000	316270000
A0A0U1RRM6;Q8N8S7-3;Q8N8S7-2;Q8N8S7;A0A075B6E5;A0A0U1RQP7	A0A0U1RRM6;Q8N8S7-3;Q8N8S7-2;Q8N8S7;A0A075B6E5;A0A0U1RQP7	4;4;4;4;3;2	4;4;4;4;3;2	4;4;4;4;3;2	Protein enabled homolog	ENAH	Protein enabled homolog;Isoform 3 of Protein enabled homolog;Isoform 2 of Protein enabled homolog;Protein enabled homolog;Protein enabled homolog (Fragment);Protein enabled homolog (Fragment)	6	4	4	4	0	0	0	1	2	3	0	0	0	1	2	3	0	0	0	1	2	3	5.4	5.4	5.4	87.399	802	802;533;570;591;213;242	0.00071736	6.3549	0	0	0	1.2	2.2	4.4	20533000	0	0	0	2665600	5561300
H0YJB6;A0A0U1RRM8;H0YJ34;Q96AC1-2;Q96AC1;Q96AC1-3	H0YJB6;A0A0U1RRM8;H0YJ34;Q96AC1-2;Q96AC1;Q96AC1-3	1;1;1;1;1;1	1;1;1;1;1;1	1;1;1;1;1;1	Fermitin family homolog 2	FERMT2	Fermitin family homolog 2 (Fragment);Fermitin family homolog 2 (Fragment);Fermitin family homolog 2 (Fragment);Isoform 2 of Fermitin family homolog 2;Fermitin family homolog 2;Isoform 3 of Fermitin family homolog 2	6	1	1	1	0	0	1	0	0	0	0	0	1	0	0	0	0	0	1	0	0	0	21.1	21.1	21.1	15.478	133	133;545;640;633;680;687	0.00067751	5.1803	0	0	21.1	0	0	0	0	0	0	0	0	0
A0A140T907;A0A140T9W4;A0A140T9X0;A2AB09;A0A140T9R1;O75955-2;O75955	A0A140T907;A0A140T9W4;A0A140T9X0;A2AB09;A0A140T9R1;O75955-2;O75955	1;1;1;1;1;1;1	1;1;1;1;1;1;1	1;1;1;1;1;1;1	Flotillin-1	FLOT1	Flotillin-1 (Fragment);Flotillin-1 (Fragment);Flotillin-1 (Fragment);Flotillin-1 (Fragment);Flotillin-1 (Fragment);Isoform 2 of Flotillin-1;Flotillin-1	7	1	1	1	0	0	0	1	1	0	0	0	0	1	1	0	0	0	0	1	1	0	21.7	21.7	21.7	7.0999	60	60;186;231;238;357;379;427	0.0079909	2.5759	0	0	0	21.7	21.7	0	0	0	0	0	0	0
A0A140T9I0;A0A140T9X5;A0A140T913;P01892;A0A140T955;A0A140T933;A0A1W2PRT9;A0A1W2PPQ2;P30459;A0A140T975;Q9GJ45;A0A1W2PS39;P16189;P10314;A0A140T941;A0A1W2PQS8;A0A140T9Z6;B0UXQ0;P30512;Q09160	A0A140T9I0;A0A140T9X5;A0A140T913;P01892;A0A140T955;A0A140T933;A0A1W2PRT9;A0A1W2PPQ2;P30459	17;17;17;17;15;15;15;14;9;8;8;8;8;8;7;7;7;7;7;5	17;17;17;17;15;15;15;14;9;8;8;8;8;8;7;7;7;7;7;5	0;0;0;0;0;0;0;0;0;0;0;0;0;0;0;0;0;0;0;0	HLA class I histocompatibility antigen, A-2 alpha chain;HLA class I histocompatibility antigen, A-74 alpha chain	HLA-A	HLA class I histocompatibility antigen, A-3 alpha chain (Fragment);HLA class I histocompatibility antigen, A-3 alpha chain (Fragment);HLA class I histocompatibility antigen, A-3 alpha chain;HLA class I histocompatibility antigen, A-2 alpha chain;HLA class	20	17	17	0	11	7	9	13	16	16	11	7	9	13	16	16	0	0	0	0	0	0	52.3	52.3	0	40.79	365	365;371;371;365;299;299;362;339;365;299;326;339;365;365;299;325;342;365;365;365	0	286.4	36.2	23.8	30.1	43.3	52.3	47.9	922680000	87126000	33579000	64356000	225890000	255050000
O19617;A0A140T921;A2AEA2;A0A140T9H5;A0A140T9U8;P10321;A0A1W2PRU9	O19617;A0A140T921;A2AEA2;A0A140T9H5;A0A140T9U8;P10321;A0A1W2PRU9	6;6;6;6;6;6;4	1;1;1;1;1;1;1	1;1;1;1;1;1;1	HLA class I histocompatibility antigen, Cw-7 alpha chain	HLA-C	HLA class I antigen;HLA class I histocompatibility antigen, Cw-6 alpha chain;HLA class I histocompatibility antigen, Cw-6 alpha chain;HLA class I histocompatibility antigen, Cw-6 alpha chain;HLA class I histocompatibility antigen, Cw-6 alpha chain;HLA clas	7	6	1	1	4	3	4	6	6	6	0	0	0	1	1	1	0	0	0	1	1	1	20.5	4.4	4.4	40.71	366	366;368;372;372;397;366;244	0	8.7677	13.7	9.8	13.7	20.5	20.5	20.5	46581000	0	0	0	19568000	12789000
K7EIR2;A0A140TA84;A0A140TA86;Q5XKP0	K7EIR2;A0A140TA84;A0A140TA86;Q5XKP0	1;1;1;1	1;1;1;1	1;1;1;1	Protein QIL1	C19orf70;QIL1	MICOS complex subunit MIC13;MICOS complex subunit MIC13;MICOS complex subunit MIC13;MICOS complex subunit MIC13	4	1	1	1	0	0	1	1	1	0	0	0	1	1	1	0	0	0	1	1	1	0	36.4	36.4	36.4	9.7002	88	88;110;140;118	0.00069832	5.7797	0	0	36.4	36.4	36.4	0	13642000	0	0	3463100	3145000	7033500
A0A1B0GTC3;A0A1B0GVH5;Q9C0B1;A0A1B0GTY1;A0A1B0GUC3;A0A1B0GV98;A0A1B0GTC5;A0A1B0GU26;A0A1B0GUY7;Q9C0B1-3;Q9C0B1-4;Q9C0B1-2	A0A1B0GTC3;A0A1B0GVH5;Q9C0B1;A0A1B0GTY1;A0A1B0GUC3;A0A1B0GV98;A0A1B0GTC5;A0A1B0GU26	3;3;3;2;2;2;2;2;1;1;1;1	3;3;3;2;2;2;2;2;1;1;1;1	3;3;3;2;2;2;2;2;1;1;1;1	Alpha-ketoglutarate-dependent dioxygenase FTO	FTO	Alpha-ketoglutarate-dependent dioxygenase FTO;Alpha-ketoglutarate-dependent dioxygenase FTO;Alpha-ketoglutarate-dependent dioxygenase FTO;Alpha-ketoglutarate-dependent dioxygenase FTO;Alpha-ketoglutarate-dependent dioxygenase FTO;Alpha-ketoglutarate-depend	12	3	3	3	0	0	0	3	1	2	0	0	0	3	1	2	0	0	0	3	1	2	7.3	7.3	7.3	61.313	533	533;559;505;421;450;455;457;481;173;60;106;127	0.00068353	5.3527	0	0	0	7.3	1.7	3.8	10923000	0	0	0	5457500	1580400
A0A1B0GWJ0;A0A1B0GTJ7;P30566-2;P30566;A0A1B0GTG9;A0A1B0GWF8;A0A0A6YY92;A0A096LNY5;A0A096LNY6;A0A096LNY4;B4DEP1;A0A1W2PRX2;A0A096LP72;V9GY96;A0A096LP92;A0A096LP76;A0A096LPA2	A0A1B0GWJ0;A0A1B0GTJ7;P30566-2;P30566;A0A1B0GTG9;A0A1B0GWF8;A0A0A6YY92;A0A096LNY5;A0A096LNY6	7;7;7;7;6;6;6;4;4;3;2;2;2;1;1;1;1	7;7;7;7;6;6;6;4;4;3;2;2;2;1;1;1;1	7;7;7;7;6;6;6;4;4;3;2;2;2;1;1;1;1	Adenylosuccinate lyase	ADSL	Adenylosuccinate lyase;Adenylosuccinate lyase;Isoform 2 of Adenylosuccinate lyase;Adenylosuccinate lyase;Adenylosuccinate lyase (Fragment);Adenylosuccinate lyase (Fragment);Adenylosuccinate lyase;Adenylosuccinate lyase (Fragment);Adenylosuccinate lyase (Fr	17	7	7	7	0	0	0	3	4	5	0	0	0	3	4	5	0	0	0	3	4	5	24.8	24.8	24.8	54.465	480	480;480;425;484;377;403;498;262;360;164;127;142;149;57;78;102;133	0	20.163	0	0	0	10.6	15.6	16.9	48704000	0	0	0	17539000	16801000
A0A1B0GV06;A0A1B0GTP7;A0A1B0GUE3;A0A1B0GUG1;A0A1B0GUW4;E7EMM4;A0A1B0GW68;A0A1B0GUA4;A0A1B0GTM3;A0A1B0GTZ5;A0A1B0GUH5;Q13510-3;Q13510;Q13510-2	A0A1B0GV06;A0A1B0GTP7;A0A1B0GUE3;A0A1B0GUG1;A0A1B0GUW4;E7EMM4;A0A1B0GW68;A0A1B0GUA4;A0A1B0GTM3;A0A1B0GTZ5;A0A1B0GUH5;Q13510-3;Q13510;Q13510-2	1;1;1;1;1;1;1;1;1;1;1;1;1;1	1;1;1;1;1;1;1;1;1;1;1;1;1;1	1;1;1;1;1;1;1;1;1;1;1;1;1;1	Acid ceramidase;Acid ceramidase subunit alpha;Acid ceramidase subunit beta	ASAH1	Acid ceramidase (Fragment);Acid ceramidase;Acid ceramidase;Acid ceramidase;Acid ceramidase (Fragment);Acid ceramidase;Acid ceramidase;Acid ceramidase;Acid ceramidase;Acid ceramidase;Acid ceramidase;Isoform 3 of Acid ceramidase;Acid ceramidase;Isoform 2 of	14	1	1	1	0	0	1	0	0	0	0	0	1	0	0	0	0	0	1	0	0	0	11.5	11.5	11.5	22.837	200	200;288;330;366;368;370;374;375;376;386;393;389;395;411	0.00070175	5.8663	0	0	11.5	0	0	0	4931500	0	0	4931500	0	0
A0A1B0GTU4;P49023-2;P49023;P49023-3;F5GZ78;P49023-4;A0A1B0GU60;F5H836;A0A1B0GV30	A0A1B0GTU4;P49023-2;P49023;P49023-3;F5GZ78;P49023-4;A0A1B0GU60	12;12;12;12;11;7;6;4;1	12;12;12;12;11;7;6;4;1	12;12;12;12;11;7;6;4;1	Paxillin	PXN	Paxillin;Isoform Alpha of Paxillin;Paxillin;Isoform Gamma of Paxillin;Paxillin;Isoform 4 of Paxillin;Paxillin	9	12	12	12	11	9	11	1	2	3	11	9	11	1	2	3	11	9	11	1	2	3	17.4	17.4	17.4	115.9	1081	1081;557;591;605;589;424;706;176;207	0	104.65	16.1	13.1	16.2	2	3.4	4.5	269230000	85499000	46401000	121030000	4380700	2788700
A0A1B0GTW1;Q9UDY2-4;Q9UDY2-2;Q9UDY2-6;Q9UDY2-3;Q9UDY2;Q9UDY2-7	A0A1B0GTW1;Q9UDY2-4;Q9UDY2-2;Q9UDY2-6;Q9UDY2-3;Q9UDY2;Q9UDY2-7	1;1;1;1;1;1;1	1;1;1;1;1;1;1	1;1;1;1;1;1;1	Tight junction protein ZO-2	TJP2	Tight junction protein ZO-2;Isoform C2 of Tight junction protein ZO-2;Isoform A2 of Tight junction protein ZO-2;Isoform 6 of Tight junction protein ZO-2;Isoform C1 of Tight junction protein ZO-2;Tight junction protein ZO-2;Isoform 7 of Tight junction prote	7	1	1	1	0	0	1	0	0	0	0	0	1	0	0	0	0	0	1	0	0	0	1.7	1.7	1.7	140.73	1249	1249;1020;1043;1157;1167;1190;1221	0	9.1463	0	0	1.7	0	0	0	32799000	0	0	32799000	0	0
F8W9L6;F5H006;A0A1B0GU45;Q12912-2;Q12912;H0YJ39	F8W9L6;F5H006;A0A1B0GU45;Q12912-2;Q12912;H0YJ39	2;2;2;2;2;1	2;2;2;2;2;1	2;2;2;2;2;1	Lymphoid-restricted membrane protein;Processed lymphoid-restricted membrane protein	LRMP	Lymphoid-restricted membrane protein;Lymphoid-restricted membrane protein;Lymphoid-restricted membrane protein;Isoform 2 of Lymphoid-restricted membrane protein;Lymphoid-restricted membrane protein;Lymphoid-restricted membrane protein (Fragment)	6	2	2	2	0	1	2	1	1	1	0	1	2	1	1	1	0	1	2	1	1	1	4.3	4.3	4.3	38.995	348	348;446;1454;499;555;69	0.0053097	2.8908	0	2.3	4.3	2.3	2.3	2.3	608990000	0	113820000	120750000	122990000	134850000
A0A1B0GW37;A0A1B0GU97;Q5VW31;A0A1B0GWB8;P08651-4;U3KQE8;A0A1B0GVN4;P08651-3;Q14938-6;A0A1B0GWJ4;A0A0A0MRX8;A0A1B0GWI9;Q5VW27;Q14938-4;P08651-2;Q12857-3;Q5VW30;Q5VW26;O00712-6;O00712;O00712-4;O00712-5	A0A1B0GW37;A0A1B0GU97;Q5VW31;A0A1B0GWB8;P08651-4;U3KQE8;A0A1B0GVN4;P08651-3;Q14938-6;A0A1B0GWJ4;A0A0A0MRX8;A0A1B0GWI9;Q5VW27;Q14938-4;P08651-2;Q12857-3;Q5VW30;Q5VW26;O00712-6;O00712;O00712-4;O00712-5	2;2;1;1;1;1;1;1;1;1;1;1;1;1;1;1;1;1;1;1;1;1	2;2;1;1;1;1;1;1;1;1;1;1;1;1;1;1;1;1;1;1;1;1	2;2;1;1;1;1;1;1;1;1;1;1;1;1;1;1;1;1;1;1;1;1	Nuclear factor 1;Nuclear factor 1 B-type	NFIB	Nuclear factor 1;Nuclear factor 1;Nuclear factor 1 B-type;Nuclear factor 1 B-type;Isoform 3 of Nuclear factor 1 C-type;Nuclear factor 1;Nuclear factor 1 B-type;Isoform 2 of Nuclear factor 1 C-type;Isoform 6 of Nuclear factor 1 X-type;Nuclear factor 1;Nucle	22	2	2	2	1	1	1	2	1	1	1	1	1	2	1	1	1	1	1	2	1	1	6.3	6.3	6.3	46.404	411	411;478;168;308;406;416;424;430;433;445;446;480;487;494;499;501;561;570;309;420;471;494	0.00069541	5.6691	2.4	2.4	2.4	6.3	2.4	2.4	121390000	18355000	20268000	19192000	23544000	18841000
A0A1B0GW44;A0A1B0GVD5;A0A1B0GWE8;P07339;A0A1B0GV23;A0A1B0GVP3;A0A1B0GU92;A0A1B0GU03;H7C469;C9JH19;H7C1V0;F8WD96;F8W787;A0A1B0GVF1;A0A1B0GV01	A0A1B0GW44;A0A1B0GVD5;A0A1B0GWE8;P07339;A0A1B0GV23;A0A1B0GVP3;A0A1B0GU92;A0A1B0GU03;H7C469;C9JH19	15;15;15;15;14;13;12;12;11;9;7;7;5;1;1	15;15;15;15;14;13;12;12;11;9;7;7;5;1;1	15;15;15;15;14;13;12;12;11;9;7;7;5;1;1	Cathepsin D;Cathepsin D light chain;Cathepsin D heavy chain	CTSD	Cathepsin D;Cathepsin D;Cathepsin D;Cathepsin D;Cathepsin D;Cathepsin D;Uncharacterized protein;Uncharacterized protein;Uncharacterized protein (Fragment);Cathepsin D (Fragment)	15	15	15	15	11	11	12	13	12	12	11	11	12	13	12	12	11	11	12	13	12	12	52.1	52.1	52.1	43.688	405	405;409;410;412;406;405;557;582;336;299;189;276;199;73;94	0	308.56	39.3	35.6	38	40	38	43.2	1375400000	113580000	72997000	146680000	352830000	309930000
A0A1B0GVM2;A6NFQ2-3;A6NFQ2;H0YC74;A6NFQ2-2	A0A1B0GVM2;A6NFQ2-3;A6NFQ2;H0YC74;A6NFQ2-2	2;2;2;1;1	2;2;2;1;1	2;2;2;1;1	TRPM8 channel-associated factor 2	TCAF2	Uncharacterized protein (Fragment);Isoform 3 of TRPM8 channel-associated factor 2;TRPM8 channel-associated factor 2;TRPM8 channel-associated factor 2 (Fragment);Isoform 2 of TRPM8 channel-associated factor 2	5	2	2	2	1	0	1	0	0	0	1	0	1	0	0	0	1	0	1	0	0	0	3.4	3.4	3.4	78.793	712	712;815;919;660;845	0.0036298	3.2395	1.3	0	2.1	0	0	0	4798100	767530	0	4030600	0	0
A0A1B0GVZ4;P06132;A0A1B0GVN9;Q5T446;H0Y5R6	A0A1B0GVZ4;P06132;A0A1B0GVN9;Q5T446;H0Y5R6	8;8;6;4;4	8;8;6;4;4	8;8;6;4;4	Uroporphyrinogen decarboxylase	UROD	Uroporphyrinogen decarboxylase;Uroporphyrinogen decarboxylase;Uroporphyrinogen decarboxylase;Uroporphyrinogen decarboxylase (Fragment);Uroporphyrinogen decarboxylase (Fragment)	5	8	8	8	4	3	5	5	5	7	4	3	5	5	5	7	4	3	5	5	5	7	41.7	41.7	41.7	35.704	321	321;367;298;193;228	0	40.46	18.7	19.6	30.5	27.4	25.5	33.6	158110000	18237000	8269500	39275000	21164000	21571000
A0A1C7CYX9;Q16555;Q16555-2;E5RFU4	A0A1C7CYX9;Q16555;Q16555-2	24;24;23;4	24;24;23;4	19;19;19;2	Dihydropyrimidinase-related protein 2	DPYSL2	Dihydropyrimidinase-related protein 2;Dihydropyrimidinase-related protein 2;Isoform 2 of Dihydropyrimidinase-related protein 2	4	24	24	19	18	19	19	20	19	21	18	19	19	20	19	21	14	14	14	16	15	17	56.6	56.6	47.1	73.502	677	677;572;536;170	0	323.31	44	45.1	45.1	46.7	47.3	50.7	1505400000	228560000	137830000	357960000	233770000	250860000
A0A1W2PPR6;A0A1W2PNP0;Q969N2-6;Q969N2-5;Q969N2;A0A1W2PQ29;A0A1W2PPI8;A0A1W2PRH2;A0A1W2PP13;F6W983;A0A1W2PPQ7;A0A1W2PRZ8;A0A1W2PR92;A0A1W2PP53;A0A1W2PP57;A0A1W2PPC3;A0A1W2PPS0;Q969N2-3;Q969N2-2;Q969N2-4;A0A1W2PP91;A0A1W2PR22;B7Z7C5;A0A1W2PP03;A0A1W2PR73;A0A1W2PNZ5;A0A1W2PNS2;A0A1W2PP98;A0A1W2PQL3;A0A1W2PRH8;A0A1W2PRG1;A0A1W2PNW9;A0A1W2PPU8;H7C2Y2;A0A1W2PQ52;A0A1W2PQN1;A0A1W2PRV7	A0A1W2PPR6;A0A1W2PNP0;Q969N2-6;Q969N2-5;Q969N2;A0A1W2PQ29;A0A1W2PPI8;A0A1W2PRH2;A0A1W2PP13;F6W983;A0A1W2PPQ7;A0A1W2PRZ8;A0A1W2PR92;A0A1W2PP53;A0A1W2PP57;A0A1W2PPC3;A0A1W2PPS0;Q969N2-3;Q969N2-2;Q969N2-4	3;3;3;3;3;2;2;2;2;2;2;2;2;2;2;2;2;2;2;2;1;1;1;1;1;1;1;1;1;1;1;1;1;1;1;1;1	3;3;3;3;3;2;2;2;2;2;2;2;2;2;2;2;2;2;2;2;1;1;1;1;1;1;1;1;1;1;1;1;1;1;1;1;1	3;3;3;3;3;2;2;2;2;2;2;2;2;2;2;2;2;2;2;2;1;1;1;1;1;1;1;1;1;1;1;1;1;1;1;1;1	GPI transamidase component PIG-T	PIGT	GPI transamidase component PIG-T (Fragment);GPI transamidase component PIG-T (Fragment);Isoform 6 of GPI transamidase component PIG-T;Isoform 5 of GPI transamidase component PIG-T;GPI transamidase component PIG-T;GPI transamidase component PIG-T;GPI transa	37	3	3	3	0	0	3	0	0	2	0	0	3	0	0	2	0	0	3	0	0	2	6.2	6.2	6.2	60.355	532	532;580;511;522;578;300;314;316;354;384;393;429;432;441;495;499;505;367;384;476;77;116;123;128;136;140;183;191;198;203;232;240;242;275;318;329;331	0.00065789	4.5822	0	0	6.2	0	0	3.9	8490900	0	0	5527500	0	0
A0A1W2PNV4;E9PF58;Q92747-2;F8WFD3	A0A1W2PNV4;E9PF58	10;5;4;1	10;5;4;1	0;0;0;0		ARPC1A	Uncharacterized protein;Actin-related protein 2/3 complex subunit 1A	4	10	10	0	7	4	6	6	8	7	7	4	6	6	8	7	0	0	0	0	0	0	26.9	26.9	0	75.872	684	684;279;345;53	0	47.633	20.8	12.6	19.6	18	23.2	20.6	226330000	40374000	16140000	53128000	38233000	37406000
A0A1W2PNX8;Q9H3U1-2;Q9H3U1	A0A1W2PNX8;Q9H3U1-2;Q9H3U1	1;1;1	1;1;1	1;1;1	Protein unc-45 homolog A	UNC45A	Protein unc-45 homolog A;Isoform 2 of Protein unc-45 homolog A;Protein unc-45 homolog A	3	1	1	1	0	0	0	1	0	0	0	0	0	1	0	0	0	0	0	1	0	0	1.8	1.8	1.8	118.39	1084	1084;929;944	0.0012461	3.7819	0	0	0	1.8	0	0	1180600	0	0	0	1180600	0
A0A1W2PRL9;A0A1W2PPZ5;P23193-2;P23193;B7Z4S1;Q5JRI7;A0A0A0MT58;Q15560-2;Q15560	A0A1W2PRL9;A0A1W2PPZ5;P23193-2;P23193;B7Z4S1;Q5JRI7;A0A0A0MT58;Q15560-2;Q15560	2;2;2;2;1;1;1;1;1	2;2;2;2;1;1;1;1;1	2;2;2;2;1;1;1;1;1	Transcription elongation factor A protein 1;Transcription elongation factor A protein 2	TCEA1;TCEA2	Transcription elongation factor A protein 1;Transcription elongation factor A protein 1;Isoform 2 of Transcription elongation factor A protein 1;Transcription elongation factor A protein 1;Transcription elongation factor A protein 1;Transcription elongatio	9	2	2	2	0	0	0	1	1	2	0	0	0	1	1	2	0	0	0	1	1	2	8.9	8.9	8.9	31.63	280	280;301;280;301;117;246;270;272;299	0.00066667	4.8082	0	0	0	4.3	4.3	8.9	5930600	0	0	0	1475200	1546600
E9PJA7;A0A1W2PQ43;E9PK09;E9PQN2;E9PKI6;E9PK91;Q9NYF8-4;Q9NYF8-3;Q9NYF8-2;Q9NYF8;H0YF00	E9PJA7;A0A1W2PQ43;E9PK09;E9PQN2;E9PKI6;E9PK91;Q9NYF8-4;Q9NYF8-3;Q9NYF8-2;Q9NYF8;H0YF00	2;2;2;2;2;2;2;2;2;2;1	2;2;2;2;2;2;2;2;2;2;1	2;2;2;2;2;2;2;2;2;2;1	Bcl-2-associated transcription factor 1	BCLAF1	Bcl-2-associated transcription factor 1;Bcl-2-associated transcription factor 1;Bcl-2-associated transcription factor 1 (Fragment);Bcl-2-associated transcription factor 1;Bcl-2-associated transcription factor 1;Bcl-2-associated transcription factor 1;Isofo	11	2	2	2	2	1	2	0	1	1	2	1	2	0	1	1	2	1	2	0	1	1	4.5	4.5	4.5	52.917	467	467;703;725;750;752;871;747;869;918;920;118	0.00068966	5.5253	4.5	1.9	4.5	0	2.6	2.6	18101000	5407000	1294100	3324600	0	4456500
E9PNM1;A0A1W2PQ47;P37268-4;P37268-3;P37268-2;P37268;P37268-5;E9PS69	E9PNM1;A0A1W2PQ47;P37268-4;P37268-3;P37268-2;P37268;P37268-5	4;4;4;4;4;4;3;1	4;4;4;4;4;4;3;1	4;4;4;4;4;4;3;1	Squalene synthase	FDFT1	Squalene synthase;Squalene synthase;Isoform 4 of Squalene synthase;Isoform 3 of Squalene synthase;Isoform 2 of Squalene synthase;Squalene synthase;Isoform 5 of Squalene synthase	8	4	4	4	0	0	0	3	2	3	0	0	0	3	2	3	0	0	0	3	2	3	13.2	13.2	13.2	47.285	410	410;476;306;332;353;417;374;113	0	20.991	0	0	0	10.5	5.6	10.5	14730000	0	0	0	2556800	1780200
A0A1X7SBZ2;A0A1W2PQ51;Q92841-1;Q92841-3;Q92841-2;Q92841;A0A0U1RQJ0	A0A1X7SBZ2;A0A1W2PQ51;Q92841-1;Q92841-3;Q92841-2;Q92841	21;21;21;21;21;21;2	21;21;21;21;21;21;2	15;15;15;15;15;15;1	Probable ATP-dependent RNA helicase DDX17	DDX17	Probable ATP-dependent RNA helicase DDX17;Probable ATP-dependent RNA helicase DDX17;Isoform 2 of Probable ATP-dependent RNA helicase DDX17;Isoform 4 of Probable ATP-dependent RNA helicase DDX17;Isoform 3 of Probable ATP-dependent RNA helicase DDX17;Probabl	7	21	21	15	13	10	14	15	16	16	13	10	14	15	16	16	9	6	8	11	12	12	35.1	35.1	25.8	80.253	729	729;731;650;652;652;729;56	0	121.33	20.6	16.9	22.9	24.6	25.9	27.3	409560000	48189000	23248000	61246000	107730000	77822000
A0A1W2PQD2;Q9UBB4;Q9UBB4-2	A0A1W2PQD2;Q9UBB4;Q9UBB4-2	2;2;1	2;2;1	2;2;1	Ataxin-10	ATXN10	Ataxin-10;Ataxin-10;Isoform 2 of Ataxin-10	3	2	2	2	0	0	0	0	2	0	0	0	0	0	2	0	0	0	0	0	2	0	9.4	9.4	9.4	44.602	395	395;475;411	0.0036474	3.3311	0	0	0	0	9.4	0	0	0	0	0	0	0
A0A1W2PQV2;H3BUH9;P23434	A0A1W2PQV2;H3BUH9;P23434	1;1;1	1;1;1	1;1;1	Glycine cleavage system H protein, mitochondrial	GCSH	Glycine cleavage system H protein, mitochondrial (Fragment);Glycine cleavage system H protein, mitochondrial (Fragment);Glycine cleavage system H protein, mitochondrial	3	1	1	1	0	0	0	1	1	1	0	0	0	1	1	1	0	0	0	1	1	1	20	20	20	10.999	100	100;118;173	0	25.267	0	0	0	20	20	20	11287000	0	0	0	4745200	6542300
A0A1W2PR36;Q14353;Q14353-2;K7EM34	A0A1W2PR36;Q14353;Q14353-2;K7EM34	2;2;2;1	2;2;2;1	2;2;2;1	Guanidinoacetate N-methyltransferase	GAMT	Guanidinoacetate N-methyltransferase;Guanidinoacetate N-methyltransferase;Isoform 2 of Guanidinoacetate N-methyltransferase;Guanidinoacetate N-methyltransferase (Fragment)	4	2	2	2	0	0	0	0	1	1	0	0	0	0	1	1	0	0	0	0	1	1	28.2	28.2	28.2	23.804	213	213;236;269;108	0.0041617	3.0003	0	0	0	0	18.3	9.9	13026000	0	0	0	0	4301700
A0A1W2PS43;Q14108;A0A1W2PPX5;A0A1W2PQR6;A0A1W2PQB7;A0A1W2PRS1;A0A1W2PRF6;Q14108-2;A0A1W2PPU6;A0A1W2PSE4;D6RDG0;A0A1W2PS70;A0A1W2PNX7;A0A1W2PQL5	A0A1W2PS43;Q14108;A0A1W2PPX5;A0A1W2PQR6;A0A1W2PQB7;A0A1W2PRS1;A0A1W2PRF6;Q14108-2;A0A1W2PPU6	7;7;6;6;6;6;5;5;4;2;1;1;1;1	7;7;6;6;6;6;5;5;4;2;1;1;1;1	7;7;6;6;6;6;5;5;4;2;1;1;1;1	Lysosome membrane protein 2	SCARB2	Lysosome membrane protein 2;Lysosome membrane protein 2;Lysosome membrane protein 2;Lysosome membrane protein 2;Lysosome membrane protein 2;Lysosome membrane protein 2 (Fragment);Lysosome membrane protein 2;Isoform 2 of Lysosome membrane protein 2;Lysosome	14	7	7	7	6	5	6	0	0	0	6	5	6	0	0	0	6	5	6	0	0	0	24	24	24	53.891	475	475;478;432;449;470;519;320;335;438;206;106;141;145;174	0	39.14	21.3	19.8	17.7	0	0	0	73444000	30317000	16386000	26740000	0	0
A0A286YEX5;C9JRZ6;F8WAR4;Q9NX63	A0A286YEX5;C9JRZ6;F8WAR4;Q9NX63	2;2;2;2	2;2;2;2	2;2;2;2	MICOS complex subunit MIC19	CHCHD3	MICOS complex subunit (Fragment);MICOS complex subunit;MICOS complex subunit;MICOS complex subunit MIC19	4	2	2	2	1	0	0	2	2	1	1	0	0	2	2	1	1	0	0	2	2	1	25.7	25.7	25.7	11.279	101	101;232;241;227	0.00069979	5.8468	14.9	0	0	25.7	25.7	10.9	15345000	3504800	0	0	7603000	2093200
A0A286YF22;O43175;A0A2C9F2M7;A0A286YFA2;A0A286YFL2;A0A286YFM8;A0A286YF78;A0A286YER3;A0A286YFC8;A0A286YFB2;A0A286YF34;A0A286YFE1;A0A286YFF3;A0A286YFK5	A0A286YF22;O43175;A0A2C9F2M7;A0A286YFA2;A0A286YFL2	19;19;17;15;13;9;7;5;5;5;4;3;2;2	19;19;17;15;13;9;7;5;5;5;4;3;2;2	19;19;17;15;13;9;7;5;5;5;4;3;2;2	D-3-phosphoglycerate dehydrogenase	PHGDH	D-3-phosphoglycerate dehydrogenase;D-3-phosphoglycerate dehydrogenase;D-3-phosphoglycerate dehydrogenase;D-3-phosphoglycerate dehydrogenase;D-3-phosphoglycerate dehydrogenase	14	19	19	19	9	5	11	17	16	17	9	5	11	17	16	17	9	5	11	17	16	17	49.2	49.2	49.2	55.938	526	526;533;532;445;429;239;276;97;123;165;72;89;63;145	0	256.05	25.7	13.9	29.8	45.4	41.8	42.8	852510000	62787000	14282000	96176000	230810000	220390000
Q5T0S4;A0A286YFE3;A0A2C9F2P4;A0A286YFL8;A0A286YFF7;P50897-2;P50897;A0A286YFL6	Q5T0S4;A0A286YFE3;A0A2C9F2P4;A0A286YFL8;A0A286YFF7;P50897-2;P50897;A0A286YFL6	2;2;2;2;2;2;2;1	2;2;2;2;2;2;2;1	2;2;2;2;2;2;2;1	Palmitoyl-protein thioesterase 1	PPT1	Palmitoyl-protein thioesterase 1;Palmitoyl-protein thioesterase 1;Palmitoyl-protein thioesterase 1;Palmitoyl-protein thioesterase 1 (Fragment);Palmitoyl-protein thioesterase 1;Isoform 2 of Palmitoyl-protein thioesterase 1;Palmitoyl-protein thioesterase 1;P	8	2	2	2	0	0	0	1	1	0	0	0	0	1	1	0	0	0	0	1	1	0	10.6	10.6	10.6	31.36	282	282;301;305;323;335;203;306;78	0.007923	2.4953	0	0	0	6	4.6	0	10250000	0	0	0	8119300	2131000
A0AVT1;A0AVT1-2;A0AVT1-4;A0AVT1-3;H0Y8S8;H0Y9U5	A0AVT1;A0AVT1-2	28;15;10;10;5;1	28;15;10;10;5;1	28;15;10;10;5;1	Ubiquitin-like modifier-activating enzyme 6	UBA6	Ubiquitin-like modifier-activating enzyme 6;Isoform 2 of Ubiquitin-like modifier-activating enzyme 6	6	28	28	28	24	20	21	0	0	0	24	20	21	0	0	0	24	20	21	0	0	0	41.2	41.2	41.2	117.97	1052	1052;578;340;389;271;88	0	146.74	31.7	27.2	32.6	0	0	0	410470000	147170000	83472000	179820000	0	0
M0R1B5;E9PL44;E9PJS0;M0R026;A1L0T0	M0R1B5;E9PL44;E9PJS0;M0R026;A1L0T0	1;1;1;1;1	1;1;1;1;1	1;1;1;1;1	Acetolactate synthase-like protein	ILVBL	Acetolactate synthase-like protein (Fragment);Acetolactate synthase-like protein (Fragment);Acetolactate synthase-like protein (Fragment);Acetolactate synthase-like protein;Acetolactate synthase-like protein	5	1	1	1	1	0	1	1	1	0	1	0	1	1	1	0	1	0	1	1	1	0	13.9	13.9	13.9	17.494	165	165;166;262;525;632	0	25.834	13.9	0	13.9	13.9	13.9	0	30172000	4370700	0	14375000	5495900	5929900
A2A274;Q99798	A2A274;Q99798	13;13	13;13	13;13	Aconitate hydratase, mitochondrial	ACO2	Aconitate hydratase, mitochondrial;Aconitate hydratase, mitochondrial	2	13	13	13	5	3	4	13	12	12	5	3	4	13	12	12	5	3	4	13	12	12	24.7	24.7	24.7	87.819	805	805;780	0	72.84	9.3	7.1	8.4	24.7	22.9	22.7	266770000	0	8282700	14218000	80947000	73556000
A6NC57-2;A6NC57	A6NC57-2;A6NC57	2;2	2;2	2;2	Ankyrin repeat domain-containing protein 62	ANKRD62	Isoform 2 of Ankyrin repeat domain-containing protein 62;Ankyrin repeat domain-containing protein 62	2	2	2	2	0	1	1	0	0	1	0	1	1	0	0	1	0	1	1	0	0	1	3.1	3.1	3.1	75.409	639	639;917	0.0080321	2.609	0	1.1	1.1	0	0	2	33846000	0	3965700	8668000	0	0
H3BTL1;Q9GZQ8;A6NCE7	H3BTL1;Q9GZQ8;A6NCE7	1;1;1	1;1;1	1;1;1	Microtubule-associated proteins 1A/1B light chain 3B;Microtubule-associated proteins 1A/1B light chain 3 beta 2	MAP1LC3B;MAP1LC3B2	Microtubule-associated protein 1 light chain 3 beta, isoform CRA_f;Microtubule-associated proteins 1A/1B light chain 3B;Microtubule-associated proteins 1A/1B light chain 3 beta 2	3	1	1	1	1	1	1	1	1	1	1	1	1	1	1	1	1	1	1	1	1	1	18.7	18.7	18.7	9.0115	75	75;125;125	0.00066357	4.7505	18.7	18.7	18.7	18.7	18.7	18.7	33652000	8108300	6859400	11546000	2735300	4402500
A6NL93;A6NEL0;P05114	A6NL93;A6NEL0;P05114	1;1;1	1;1;1	1;1;1	Non-histone chromosomal protein HMG-14	HMGN1	Non-histone chromosomal protein HMG-14;Non-histone chromosomal protein HMG-14;Non-histone chromosomal protein HMG-14	3	1	1	1	1	1	1	1	1	1	1	1	1	1	1	1	1	1	1	1	1	1	14.4	14.4	14.4	9.5355	90	90;116;100	0	16.67	14.4	14.4	14.4	14.4	14.4	14.4	73651000	15582000	7624900	3409900	24610000	13856000
A6NEM2;P51610-2;P51610;P51610-4;H7C1C4;P51610-3	A6NEM2;P51610-2;P51610;P51610-4;H7C1C4;P51610-3	2;2;2;2;1;1	2;2;2;2;1;1	2;2;2;2;1;1	Host cell factor 1;HCF N-terminal chain 1;HCF N-terminal chain 2;HCF N-terminal chain 3;HCF N-terminal chain 4;HCF N-terminal chain 5;HCF N-terminal chain 6;HCF C-terminal chain 1;HCF C-terminal chain 2;HCF C-terminal chain 3;HCF C-terminal chain 4;HCF C-terminal chain 5;HCF C-terminal chain 6	HCFC1	Host cell factor 1;Isoform 2 of Host cell factor 1;Host cell factor 1;Isoform 4 of Host cell factor 1;Host cell factor 1 (Fragment);Isoform 3 of Host cell factor 1	6	2	2	2	1	0	1	0	1	2	1	0	1	0	1	2	1	0	1	0	1	2	2.1	2.1	2.1	213.47	2080	2080;1966;2035;2079;611;428	0.0006435	4.2184	0.5	0	0.5	0	0.5	2.1	10210000	3363100	0	1576200	0	2137300
A6NFX8;Q9UKK9;A6NJU6;A6NCQ0;H0YEY4;C9JYY9	A6NFX8;Q9UKK9;A6NJU6;A6NCQ0	9;9;6;5;4;1	9;9;6;5;4;1	9;9;6;5;4;1	ADP-sugar pyrophosphatase	NUDT5	ADP-sugar pyrophosphatase;ADP-sugar pyrophosphatase;ADP-sugar pyrophosphatase;ADP-sugar pyrophosphatase	6	9	9	9	6	4	4	3	2	2	6	4	4	3	2	2	6	4	4	3	2	2	53.4	53.4	53.4	25.895	232	232;219;186;180;137;97	0	36.685	37.5	19	29.3	14.7	17.7	16.4	61551000	23983000	8088500	19420000	4831400	5229000
A6NGP5;H3BMV3;Q9H910;Q9H910-3;H3BMM8;B4E1P3;H3BMT0;H3BTV5;H3BU16;Q9H910-2	A6NGP5;H3BMV3;Q9H910;Q9H910-3;H3BMM8;B4E1P3;H3BMT0;H3BTV5;H3BU16;Q9H910-2	3;3;3;3;2;2;2;2;2;2	3;3;3;3;2;2;2;2;2;2	3;3;3;3;2;2;2;2;2;2	Hematological and neurological expressed 1-like protein	HN1L	Jupiter microtubule-associated homolog 2;Jupiter microtubule-associated homolog 2 (Fragment);Jupiter microtubule associated homolog 2;Isoform 3 of Jupiter microtubule associated homolog 2;Jupiter microtubule-associated homolog 2;Jupiter microtubule-associa	10	3	3	3	0	0	0	1	3	0	0	0	0	1	3	0	0	0	0	1	3	0	32.6	32.6	32.6	18.906	178	178;190;190;218;70;98;115;116;167;174	0.0006566	4.5516	0	0	0	15.2	32.6	0	11830000	0	0	0	5776700	6053600
A6NHL2-2;A6NHL2	A6NHL2-2;A6NHL2	4;4	1;1	1;1	Tubulin alpha chain-like 3	TUBAL3	Isoform 2 of Tubulin alpha chain-like 3;Tubulin alpha chain-like 3	2	4	1	1	3	2	2	2	3	2	1	1	0	0	0	0	1	1	0	0	0	0	9.1	4.2	4.2	45.517	406	406;446	0	10.065	8.1	6.4	3.9	3.9	4.9	3.9	0	0	0	0	0	0
A6NJA2;P54578-2;P54578-3;P54578;J3QQT6;J3KS55	A6NJA2;P54578-2;P54578-3;P54578	15;15;15;15;1;1	15;15;15;15;1;1	15;15;15;15;1;1	Ubiquitin carboxyl-terminal hydrolase;Ubiquitin carboxyl-terminal hydrolase 14	USP14	Ubiquitin carboxyl-terminal hydrolase 14;Isoform 2 of Ubiquitin carboxyl-terminal hydrolase 14;Isoform 3 of Ubiquitin carboxyl-terminal hydrolase 14;Ubiquitin carboxyl-terminal hydrolase 14	6	15	15	15	11	8	13	5	7	5	11	8	13	5	7	5	11	8	13	5	7	5	51.8	51.8	51.8	51.086	448	448;459;483;494;20;28	0	80.699	43.3	35.3	44.2	18.3	26.8	17.4	206000000	51846000	27358000	68579000	17501000	25512000
A6NKB8;Q9H4A4;A0A087WU27;A0A087WUS4;C9JMZ3	A6NKB8;Q9H4A4;A0A087WU27	7;7;4;3;2	7;7;4;3;2	7;7;4;3;2	Aminopeptidase B	RNPEP	Aminopeptidase B;Aminopeptidase B;Aminopeptidase B (Fragment)	5	7	7	7	0	0	0	7	5	6	0	0	0	7	5	6	0	0	0	7	5	6	15.2	15.2	15.2	68.168	611	611;650;171;151;344	0	16.19	0	0	0	15.2	11.5	13.1	41717000	0	0	0	16684000	13887000
A6PVN5;Q15257-3;Q15257-2;Q15257;F6WIT2;Q68CR8;Q15257-4;B7ZBQ0;A6PVN6;Q5T949;Q5T948;A6PVN9;A6PVN7;A6PVN8;C9IZ76;B7ZBP9;B7ZBP7;B4DDQ6;H0Y6E5	A6PVN5;Q15257-3;Q15257-2;Q15257;F6WIT2;Q68CR8;Q15257-4;B7ZBQ0;A6PVN6;Q5T949;Q5T948;A6PVN9	6;6;6;6;5;4;4;3;3;3;3;3;2;2;2;1;1;1;1	6;6;6;6;5;4;4;3;3;3;3;3;2;2;2;1;1;1;1	6;6;6;6;5;4;4;3;3;3;3;3;2;2;2;1;1;1;1	Serine/threonine-protein phosphatase 2A activator	PPP2R4;DKFZp781M17165	Serine/threonine-protein phosphatase 2A activator;Isoform 3 of Serine/threonine-protein phosphatase 2A activator;Isoform 1 of Serine/threonine-protein phosphatase 2A activator;Serine/threonine-protein phosphatase 2A activator;Serine/threonine-protein phosp	19	6	6	6	6	3	4	4	2	3	6	3	4	4	2	3	6	3	4	4	2	3	23.4	23.4	23.4	37.375	329	329;294;323;358;288;104;281;61;176;250;253;263;64;129;132;41;77;151;218	0	16.683	23.4	10.9	16.1	13.4	7.9	9.4	61603000	22661000	6412800	12816000	4809800	2202000
A6PWM2;Q6UXH1-3;Q6UXH1-2;Q6UXH1-4;Q6UXH1;Q6UXH1-6;Q6UXH1-5	A6PWM2;Q6UXH1-3;Q6UXH1-2;Q6UXH1-4;Q6UXH1;Q6UXH1-6;Q6UXH1-5	1;1;1;1;1;1;1	1;1;1;1;1;1;1	1;1;1;1;1;1;1	Cysteine-rich with EGF-like domain protein 2	CRELD2	Cysteine-rich with EGF-like domain protein 2 (Fragment);Isoform 3 of Cysteine-rich with EGF-like domain protein 2;Isoform 2 of Cysteine-rich with EGF-like domain protein 2;Isoform 4 of Cysteine-rich with EGF-like domain protein 2;Cysteine-rich with EGF-lik	7	1	1	1	0	0	0	1	0	0	0	0	0	1	0	0	0	0	0	1	0	0	5.7	5.7	5.7	25.129	229	229;284;321;325;353;373;402	0.0030488	3.3682	0	0	0	5.7	0	0	1858600	0	0	0	1858600	0
A8K878;P55145;H7C2D6	A8K878;P55145	3;3;1	3;3;1	3;3;1	Mesencephalic astrocyte-derived neurotrophic factor	MANF	Mesencephalic astrocyte-derived neurotrophic factor;Mesencephalic astrocyte-derived neurotrophic factor	3	3	3	3	1	0	0	1	3	2	1	0	0	1	3	2	1	0	0	1	3	2	18.9	18.9	18.9	21.143	185	185;182;71	0.00073529	6.9723	4.3	0	0	4.3	18.9	13.5	24204000	0	0	0	0	12020000
H7BY10;K7EJV9;K7ERT8;A8MUS3;P62750;K7EMA7	H7BY10;K7EJV9;K7ERT8;A8MUS3;P62750;K7EMA7	5;5;5;5;5;3	5;5;5;5;5;3	5;5;5;5;5;3	60S ribosomal protein L23a	RPL23A	60S ribosomal protein L23a (Fragment);60S ribosomal protein L23a (Fragment);60S ribosomal protein L23a (Fragment);60S ribosomal protein L23a;60S ribosomal protein L23a;60S ribosomal protein L23a	6	5	5	5	5	5	5	5	5	5	5	5	5	5	5	5	5	5	5	5	5	5	32.3	32.3	32.3	17.692	158	158;170;175;194;156;70	0	28.523	32.3	32.3	32.3	32.3	32.3	32.3	274090000	36936000	18007000	63801000	36264000	49989000
Q49AN9;F5H013;P62308;A8MWD9	Q49AN9;F5H013;P62308;A8MWD9	1;1;1;1	1;1;1;1	1;1;1;1	Small nuclear ribonucleoprotein G;Putative small nuclear ribonucleoprotein G-like protein 15	SNRPG;SNRPGP15	SNRPG protein;Small nuclear ribonucleoprotein G;Small nuclear ribonucleoprotein G;Putative small nuclear ribonucleoprotein G-like protein 15	4	1	1	1	0	0	0	1	1	1	0	0	0	1	1	1	0	0	0	1	1	1	18.8	18.8	18.8	7.1013	64	64;68;76;76	0.0080046	2.5965	0	0	0	18.8	18.8	18.8	7135900	0	0	0	0	3024300
A9Z1X7;Q8IYB3-2;Q8IYB3;M0R1E7;M0QXG5;M0R088;E9PCT1	A9Z1X7;Q8IYB3-2;Q8IYB3;M0R1E7;M0QXG5;M0R088;E9PCT1	2;2;2;1;1;1;1	2;2;2;1;1;1;1	2;2;2;1;1;1;1	Serine/arginine repetitive matrix protein 1	SRRM1	Serine/arginine repetitive matrix protein 1;Isoform 2 of Serine/arginine repetitive matrix protein 1;Serine/arginine repetitive matrix protein 1;Serine/arginine repetitive matrix protein 1;Serine/arginine repetitive matrix protein 1 (Fragment);Serine/argin	7	2	2	2	1	0	1	1	2	2	1	0	1	1	2	2	1	0	1	1	2	2	5	5	5	103.39	913	913;902;904;79;101;681;820	0	15.774	1.3	0	1.3	1.3	5	5	26388000	4740400	0	5578000	2335300	5615100
B0QY01;O60784-4;O60784;O60784-2;V9GZ68;V9GYF4;B0QY02;Q6UW50;O60784-3	B0QY01;O60784-4;O60784;O60784-2;V9GZ68;V9GYF4;B0QY02;Q6UW50;O60784-3	2;2;2;2;1;1;1;1;1	2;2;2;2;1;1;1;1;1	2;2;2;2;1;1;1;1;1	Target of Myb protein 1	TOM1	Target of Myb protein 1 (Fragment);Isoform 4 of Target of Myb protein 1;Target of Myb protein 1;Isoform 2 of Target of Myb protein 1;Target of Myb protein 1 (Fragment);Target of Myb protein 1 (Fragment);Target of Myb protein 1 (Fragment);TOM1;Isoform 3 of	9	2	2	2	1	1	1	1	0	1	1	1	1	1	0	1	1	1	1	1	0	1	12	12	12	36.965	334	334;460;492;493;125;134;151;209;447	0.00075873	7.6754	3.9	3.9	3.9	8.1	0	3.9	14608000	3642700	4030600	4377400	2557000	0
B0QY89;Q9Y262-2;Q9Y262;B0QY90;C9JHP4;C9K0Q7;H7C3A0;H0Y7E6	B0QY89;Q9Y262-2;Q9Y262;B0QY90	12;12;12;9;3;3;2;1	12;12;12;9;3;3;2;1	12;12;12;9;3;3;2;1	Eukaryotic translation initiation factor 3 subunit L	EIF3L	Eukaryotic translation initiation factor 3 subunit L;Isoform 2 of Eukaryotic translation initiation factor 3 subunit L;Eukaryotic translation initiation factor 3 subunit L;Eukaryotic translation initiation factor 3 subunit L	8	12	12	12	6	6	5	7	6	7	6	6	5	7	6	7	6	6	5	7	6	7	26.5	26.5	26.5	70.901	607	607;516;564;466;150;183;127;109	0	41.211	13.2	13.5	9.7	14.8	13.2	14.8	99108000	16269000	8025100	12425000	10965000	22520000
B0QYK0;Q01844-6;Q01844-3;Q01844;Q01844-5;A0A0D9SFL3;C9JGE3;Q01844-2;H7BY36;Q01844-4	B0QYK0;Q01844-6;Q01844-3;Q01844;Q01844-5;A0A0D9SFL3;C9JGE3;Q01844-2;H7BY36	4;4;4;4;4;3;3;3;2;1	4;4;4;4;4;3;3;3;2;1	4;4;4;4;4;3;3;3;2;1	RNA-binding protein EWS	EWSR1	RNA-binding protein EWS;Isoform 6 of RNA-binding protein EWS;Isoform 3 of RNA-binding protein EWS;RNA-binding protein EWS;Isoform 5 of RNA-binding protein EWS;RNA-binding protein EWS;EWS RNA-binding protein variant 6;Isoform EWS-B of RNA-binding protein EW	10	4	4	4	3	2	2	3	4	3	3	2	2	3	4	3	3	2	2	3	4	3	11.2	11.2	11.2	64.929	618	618;600;655;656;661;584;620;583;308;354	0	37.644	8.1	6.1	6.1	8.1	11.2	8.1	114090000	15632000	9301600	21223000	25667000	21670000
B1AH49;P25325;P25325-2	B1AH49;P25325;P25325-2	2;2;2	2;2;2	2;2;2	Sulfurtransferase;3-mercaptopyruvate sulfurtransferase	MPST	3-mercaptopyruvate sulfurtransferase;3-mercaptopyruvate sulfurtransferase;Isoform 2 of 3-mercaptopyruvate sulfurtransferase	3	2	2	2	0	0	0	1	0	1	0	0	0	1	0	1	0	0	0	1	0	1	16.5	16.5	16.5	24.982	224	224;297;317	0.00062854	3.8792	0	0	0	10.7	0	5.8	8301800	0	0	0	3380200	0
B1AH77;B1AH80;P15153;B1AH78	B1AH77;B1AH80;P15153;B1AH78	5;5;5;4	3;3;3;2	3;3;3;2	Ras-related C3 botulinum toxin substrate 2	RAC2	Ras-related C3 botulinum toxin substrate 2;Ras-related C3 botulinum toxin substrate 2;Ras-related C3 botulinum toxin substrate 2;Ras-related C3 botulinum toxin substrate 2 (Fragment)	4	5	3	3	4	4	3	1	2	2	2	2	1	0	0	0	2	2	1	0	0	0	43.2	25	25	16.775	148	148;185;192;166	0.00065402	4.4677	37.2	33.8	27.7	6.8	18.2	18.2	23149000	10328000	5064600	7756100	0	0
B1AH87;P30536	B1AH87;P30536	3;3	3;3	3;3	Translocator protein	TSPO	Putative peripheral benzodiazepine receptor-related protein (Fragment);Translocator protein	2	3	3	3	2	2	2	2	3	1	2	2	2	2	3	1	2	2	2	2	3	1	36.4	36.4	36.4	11.896	107	107;169	0	25.392	15	15	15	15	36.4	7.5	90897000	20100000	13442000	4207400	14270000	25556000
B1AHB1;P33992;B1AHB2;B1AHA9	B1AHB1;P33992	4;4;1;1	4;4;1;1	4;4;1;1	DNA helicase;DNA replication licensing factor MCM5	MCM5	DNA helicase;DNA replication licensing factor MCM5	4	4	4	4	3	0	1	1	1	3	3	0	1	1	1	3	3	0	1	1	1	3	8.5	8.5	8.5	77.592	691	691;734;150;230	0	9.8266	6.8	0	2.3	2.2	2.3	6.4	26472000	13629000	0	3064500	0	1690800
B1AHD1;P55769	B1AHD1;P55769	4;4	4;4	4;4	NHP2-like protein 1;NHP2-like protein 1, N-terminally processed	NHP2L1	NHP2-like protein 1;NHP2-like protein 1	2	4	4	4	2	0	1	3	2	3	2	0	1	3	2	3	2	0	1	3	2	3	47.7	47.7	47.7	14.627	132	132;128	0	16.025	18.2	0	9.1	39.4	18.2	26.5	37955000	2875600	0	956950	10384000	13025000
B1AJY5;B1AJY7;O75832;B1AJY6;O75832-2	B1AJY5;B1AJY7;O75832	3;3;3;1;1	3;3;3;1;1	3;3;3;1;1	26S proteasome non-ATPase regulatory subunit 10	PSMD10	26S proteasome non-ATPase regulatory subunit 10;26S proteasome non-ATPase regulatory subunit 10;26S proteasome non-ATPase regulatory subunit 10	5	3	3	3	1	0	3	0	1	2	1	0	3	0	1	2	1	0	3	0	1	2	22.2	22.2	22.2	20.217	185	185;193;226;110;151	0	10.713	11.9	0	22.2	0	11.9	17.3	27109000	6689900	0	6793300	0	2240500
B1ALA9;P60891-2;P60891;B7ZB02;B1ALA7;A0A0B4J207;P21108	B1ALA9;P60891-2;P60891	5;5;5;2;1;1;1	5;5;5;2;1;1;1	2;2;2;0;0;0;0	Ribose-phosphate pyrophosphokinase 1	PRPS1	Ribose-phosphate pyrophosphokinase 1;Isoform 2 of Ribose-phosphate pyrophosphokinase 1;Ribose-phosphate pyrophosphokinase 1	7	5	5	2	1	0	2	4	4	4	1	0	2	4	4	4	1	0	0	1	2	1	29.4	29.4	10.6	24.084	218	218;251;318;114;168;318;318	0	16.225	6	0	9.2	24.8	23.9	24.8	73935000	0	0	11210000	22882000	17700000
R4GNH9;R4GMQ7;B1AMU7;B1AMU3;B1AMU4;Q9Y3B2	R4GNH9;R4GMQ7;B1AMU7;B1AMU3;B1AMU4;Q9Y3B2	1;1;1;1;1;1	1;1;1;1;1;1	1;1;1;1;1;1	Exosome complex component CSL4	EXOSC1	Exosome complex component CSL4;Exosome complex component CSL4 (Fragment);Exosome complex component CSL4 (Fragment);Exosome complex component CSL4;Exosome complex component CSL4;Exosome complex component CSL4	6	1	1	1	0	0	1	0	0	0	0	0	1	0	0	0	0	0	1	0	0	0	11.5	11.5	11.5	15.105	139	139;143;165;170;178;195	0.0095452	2.4295	0	0	11.5	0	0	0	0	0	0	0	0	0
G3V4W0;B4DY08;B2R5W2;G3V4C1;P07910-2;P07910-4;G3V5X6;G3V3K6;G3V251;B4DSU6;G3V2D6;A0A0G2JPF8;A0A0G2JNQ3;P07910-3;P0DMR1;O60812;B7ZW38;B2RXH8;G3V4M8;G3V5V7;G3V2H6	G3V4W0;B4DY08;B2R5W2;G3V4C1;P07910-2;P07910-4;G3V5X6;G3V3K6;G3V251;B4DSU6;G3V2D6;A0A0G2JPF8;A0A0G2JNQ3;P07910-3;P0DMR1;O60812;B7ZW38;B2RXH8	10;10;10;10;10;9;6;6;6;5;5;5;5;5;5;5;5;5;4;4;3	10;10;10;10;10;9;6;6;6;5;5;5;5;5;5;5;5;5;4;4;3	1;1;1;1;1;1;1;1;1;0;1;0;0;0;0;0;0;0;0;0;0	Heterogeneous nuclear ribonucleoproteins C1/C2;Heterogeneous nuclear ribonucleoprotein C-like 4;Heterogeneous nuclear ribonucleoprotein C-like 1;Heterogeneous nuclear ribonucleoprotein C-like 3;Heterogeneous nuclear ribonucleoprotein C-like 2	HNRNPC;HNRNPCL4;HNRNPCL1;HNRNPCL3;HNRNPCL2	Heterogeneous nuclear ribonucleoproteins C1/C2 (Fragment);Heterogeneous nuclear ribonucleoproteins C1/C2;Heterogeneous nuclear ribonucleoproteins C1/C2;Heterogeneous nuclear ribonucleoproteins C1/C2;Isoform C1 of Heterogeneous nuclear ribonucleoproteins C1	21	10	10	1	9	7	8	5	6	6	9	7	8	5	6	6	1	1	1	1	1	1	39.3	39.3	6.9	28.916	262	262;288;290;292;293;250;117;121;126;147;214;293;293;226;293;293;293;293;66;180;54	0	54.589	36.6	33.2	35.5	25.2	29.4	29	301260000	85643000	31959000	95650000	30865000	28361000
B2WTI3;B2WTI4;K7EJU9;Q6NYC1-2;Q6NYC1;Q6NYC1-3	B2WTI3;B2WTI4;K7EJU9;Q6NYC1-2;Q6NYC1;Q6NYC1-3	1;1;1;1;1;1	1;1;1;1;1;1	1;1;1;1;1;1	Bifunctional arginine demethylase and lysyl-hydroxylase JMJD6	JMJD6	Bifunctional arginine demethylase and lysyl-hydroxylase JMJD6;Bifunctional arginine demethylase and lysyl-hydroxylase JMJD6;Bifunctional arginine demethylase and lysyl-hydroxylase JMJD6;Isoform 2 of Bifunctional arginine demethylase and lysyl-hydroxylase J	6	1	1	1	1	1	0	0	0	0	1	1	0	0	0	0	1	1	0	0	0	0	3.9	3.9	3.9	39.241	335	335;361;395;372;403;414	0.0041966	3.1188	3.9	3.9	0	0	0	0	2254300	2254300	0	0	0	0
B3KP96;O95361-2;O95361;K7ENN8;H0Y626;J3QKY5;K7EL43;Q309B1	B3KP96;O95361-2;O95361;K7ENN8;H0Y626	3;3;3;2;2;1;1;1	3;3;3;2;2;1;1;1	3;3;3;2;2;1;1;1	Tripartite motif-containing protein 16	TRIM16	Tripartite motif-containing protein 16;Isoform 2 of Tripartite motif-containing protein 16;Tripartite motif-containing protein 16;Tripartite motif-containing protein 16 (Fragment);Uncharacterized protein	8	3	3	3	0	0	0	2	3	1	0	0	0	2	3	1	0	0	0	2	3	1	11.3	11.3	11.3	50.029	434	434;348;564;232;953;115;184;348	0.00076336	7.8128	0	0	0	6.9	11.3	4.4	14050000	0	0	0	0	10134000
B3KRD8;O76054-5;O76054;C9JZI9;H7C417;O76054-4	B3KRD8;O76054-5;O76054;C9JZI9;H7C417;O76054-4	2;2;2;1;1;1	2;2;2;1;1;1	2;2;2;1;1;1	SEC14-like protein 2	SEC14L2	SEC14-like 2 (S. cerevisiae), isoform CRA_c;Isoform 3 of SEC14-like protein 2;SEC14-like protein 2;SEC14-like protein 2 (Fragment);Uncharacterized protein (Fragment);Isoform 2 of SEC14-like protein 2	6	2	2	2	0	0	0	1	1	0	0	0	0	1	1	0	0	0	0	1	1	0	14	14	14	37.455	329	329;320;403;203;338;392	0.0058617	2.8063	0	0	0	7	7	0	3616100	0	0	0	2167400	1448800
B3KSI3;M0QZ10;M0QXF9;O15382;M0QZP4;O15382-2;M0R2K7	B3KSI3;M0QZ10;M0QXF9;O15382;M0QZP4;O15382-2	5;5;5;5;4;4;2	5;5;5;5;4;4;2	5;5;5;5;4;4;2	Branched-chain-amino-acid aminotransferase;Branched-chain-amino-acid aminotransferase, mitochondrial	BCAT2	Branched-chain-amino-acid aminotransferase;Branched-chain-amino-acid aminotransferase;Branched-chain-amino-acid aminotransferase (Fragment);Branched-chain-amino-acid aminotransferase, mitochondrial;Branched-chain-amino-acid aminotransferase;Isoform B of Br	7	5	5	5	0	0	0	4	1	2	0	0	0	4	1	2	0	0	0	4	1	2	17.6	17.6	17.6	39.915	352	352;405;445;392;313;300;108	0	9.1191	0	0	0	13.6	4	8	17018000	0	0	0	8023300	2061100
B3KUB4;O43570-2;O43570	B3KUB4;O43570-2;O43570	2;2;2	2;2;2	2;2;2	Carbonic anhydrase 12	CA12	Carbonic anhydrase 12;Isoform 2 of Carbonic anhydrase 12;Carbonic anhydrase 12	3	2	2	2	2	1	1	0	0	0	2	1	1	0	0	0	2	1	1	0	0	0	15.2	15.2	15.2	31.857	283	283;343;354	0	9.598	15.2	9.9	5.3	0	0	0	9661000	2398100	3807100	3455700	0	0
B4DDF4;B4DUT8;Q99439;A0A087X271;A0A087X1X5;Q99439-2;H3BVI6;K7ES69;H3BQH0;A0A087WV51;U3KPS3	B4DDF4;B4DUT8;Q99439;A0A087X271;A0A087X1X5;Q99439-2;H3BVI6;K7ES69	8;8;8;6;6;6;5;4;3;2;1	7;7;7;5;6;5;5;3;3;2;1	7;7;7;5;6;5;5;3;3;2;1	Calponin;Calponin-2	CNN2	Calponin;Calponin;Calponin-2;Calponin (Fragment);Calponin (Fragment);Isoform 2 of Calponin-2;Calponin (Fragment);Calponin-2	11	8	7	7	2	1	1	5	8	7	1	0	1	4	7	6	1	0	1	4	7	6	35.9	32.2	32.2	32.616	298	298;330;309;179;191;270;218;148;154;66;103	0	30.491	9.1	3.7	5.4	20.1	35.9	31.5	158760000	7022900	0	12842000	41498000	44796000
B4DFG0;P35659-2;P35659;D6RDA2;D6R9L5;H0Y993;H0Y8X0	B4DFG0;P35659-2;P35659;D6RDA2	6;6;6;3;2;2;1	6;6;6;3;2;2;1	6;6;6;3;2;2;1	Protein DEK	DEK	Protein DEK;Isoform 2 of Protein DEK;Protein DEK;Protein DEK (Fragment)	7	6	6	6	2	1	3	2	2	3	2	1	3	2	2	3	2	1	3	2	2	3	25.6	25.6	25.6	39.5	347	347;341;375;122;151;156;161	0	15.278	6.6	3.7	14.7	7.5	7.2	11	24854000	0	885880	7106400	5497000	7258800
B4DGU4;P35222;E7EMJ5;C9IZ65;E9PDF9;E7EV28	B4DGU4;P35222	8;8;2;1;1;1	8;8;2;1;1;1	8;8;2;1;1;1	Catenin beta-1	CTNNB1	Catenin beta-1;Catenin beta-1	6	8	8	8	0	0	0	4	6	4	0	0	0	4	6	4	0	0	0	4	6	4	20.5	20.5	20.5	84.765	774	774;781;149;59;100;108	0	24.439	0	0	0	10.6	15.4	8.4	38072000	0	0	0	9661400	15329000
B4DIH5;P61201;P61201-2;H0YKU5;H0YM03	B4DIH5;P61201;P61201-2;H0YKU5	3;3;3;2;1	3;3;3;2;1	3;3;3;2;1	COP9 signalosome complex subunit 2	COPS2	COP9 signalosome complex subunit 2;COP9 signalosome complex subunit 2;Isoform 2 of COP9 signalosome complex subunit 2;COP9 signalosome complex subunit 2 (Fragment)	5	3	3	3	1	1	2	1	1	3	1	1	2	1	1	3	1	1	2	1	1	3	10.8	10.8	10.8	44.228	379	379;443;450;263;183	0.00067568	5.1362	2.6	2.6	6.3	2.6	2.6	10.8	14655000	0	0	4558300	1036700	0
B4DJ81;P28331-3;P28331-4;P28331-5;P28331;P28331-2	B4DJ81;P28331-3;P28331-4;P28331-5;P28331;P28331-2	4;4;4;4;4;4	4;4;4;4;4;4	4;4;4;4;4;4	NADH-ubiquinone oxidoreductase 75 kDa subunit, mitochondrial	NDUFS1	NADH-ubiquinone oxidoreductase 75 kDa subunit, mitochondrial;Isoform 3 of NADH-ubiquinone oxidoreductase 75 kDa subunit, mitochondrial;Isoform 4 of NADH-ubiquinone oxidoreductase 75 kDa subunit, mitochondrial;Isoform 5 of NADH-ubiquinone oxidoreductase 75	6	4	4	4	0	0	0	3	3	1	0	0	0	3	3	1	0	0	0	3	3	1	7.7	7.7	7.7	66.921	611	611;616;670;691;727;741	0.00074074	7.0832	0	0	0	5.7	6.1	2.6	12244000	0	0	0	7465800	2822000
B4DJV2;O75390;A0A0C4DGI3;H0YIC4;F8VPA1;H0YH82;F8VRI6;F8VPF9;F8VR34;F8W1S4;F8W4S1;F8VRP1;F8VX68;F8VTT8;F8VZK9;F8VX07;F8VWQ5;F8VU34;F8W642	B4DJV2;O75390;A0A0C4DGI3	14;14;12;5;5;5;4;4;4;4;4;3;3;3;2;2;2;2;1	14;14;12;5;5;5;4;4;4;4;4;3;3;3;2;2;2;2;1	13;13;12;5;5;5;4;4;3;4;3;3;3;2;2;2;1;1;1	Citrate synthase;Citrate synthase, mitochondrial	CS	Citrate synthase;Citrate synthase, mitochondrial;Citrate synthase	19	14	14	13	11	8	8	10	10	8	11	8	8	10	10	8	10	7	7	9	9	7	48.6	48.6	46.6	50.431	453	453;466;400;123;144;190;140;140;146;157;178;117;120;149;80;114;132;142;66	0	131.01	40	30.5	32	37.3	41.1	32.7	521700000	73414000	37351000	154900000	57471000	118320000
B4DKB2;P42892-3;P42892-2;P42892-4;P42892	B4DKB2;P42892-3;P42892-2;P42892-4;P42892	5;5;5;5;5	5;5;5;5;5	5;5;5;5;5	Endothelin-converting enzyme 1	ECE1	Endothelin-converting enzyme 1;Isoform C of Endothelin-converting enzyme 1;Isoform A of Endothelin-converting enzyme 1;Isoform D of Endothelin-converting enzyme 1;Endothelin-converting enzyme 1	5	5	5	5	1	2	5	0	0	0	1	2	5	0	0	0	1	2	5	0	0	0	9.9	9.9	9.9	83.573	738	738;754;758;767;770	0	19.136	1.4	4.6	9.9	0	0	0	27187000	1592600	8566700	17028000	0	0
B4DKY1;P49589-2;P49589;P49589-3;C9JLN0;E9PRS8;E9PLP0	B4DKY1;P49589-2;P49589;P49589-3	11;11;11;11;1;1;1	11;11;11;11;1;1;1	11;11;11;11;1;1;1	Cysteine--tRNA ligase, cytoplasmic	CARS	Cysteine--tRNA ligase, cytoplasmic;Isoform 2 of Cysteine--tRNA ligase, cytoplasmic;Cysteine--tRNA ligase, cytoplasmic;Isoform 3 of Cysteine--tRNA ligase, cytoplasmic	7	11	11	11	2	1	1	8	9	7	2	1	1	8	9	7	2	1	1	8	9	7	22.5	22.5	22.5	84.277	739	739;726;748;831;45;76;128	0	35.878	3.7	2	2	15.7	19.1	15.7	70822000	7734100	0	0	21288000	21515000
B4DR61;P61619;P61619-3;H7C1Q9;C9JXC6;H7C069;A6NK38;F2Z2C7;A6NIF9;C9JJV4;F8W776;Q8TC24;Q9H9S3-2;Q9H9S3-3;Q9H9S3	B4DR61;P61619;P61619-3	4;4;3;1;1;1;1;1;1;1;1;1;1;1;1	4;4;3;1;1;1;1;1;1;1;1;1;1;1;1	4;4;3;1;1;1;1;1;1;1;1;1;1;1;1	Protein transport protein Sec61 subunit alpha isoform 1	SEC61A1	Protein transport protein Sec61 subunit alpha isoform 1;Protein transport protein Sec61 subunit alpha isoform 1;Isoform 3 of Protein transport protein Sec61 subunit alpha isoform 1	15	4	4	4	3	4	2	3	3	2	3	4	2	3	3	2	3	4	2	3	3	2	11	11	11	52.949	482	482;476;356;94;101;145;159;162;168;189;410;418;437;454;476	0	20.243	8.7	11	6.6	8.7	8.7	6.6	93581000	18363000	10966000	9237700	28047000	19842000
H0Y630;B4DR80;Q9Y6E0-2;Q9Y6E0;C9JJV0;Q5JV99;C9JDH9;C9J6L2;C9JCC0;C9J232;H7C279;Q8NBY1;B4E0Y9;O00506-3;Q9P289-2;O00506-2;Q9P289-3;Q9P289;O00506	H0Y630;B4DR80;Q9Y6E0-2;Q9Y6E0;C9JJV0;Q5JV99;C9JDH9;C9J6L2;C9JCC0;C9J232;H7C279;Q8NBY1;B4E0Y9;O00506-3;Q9P289-2;O00506-2;Q9P289-3;Q9P289;O00506	2;2;2;2;1;1;1;1;1;1;1;1;1;1;1;1;1;1;1	2;2;2;2;1;1;1;1;1;1;1;1;1;1;1;1;1;1;1	2;2;2;2;1;1;1;1;1;1;1;1;1;1;1;1;1;1;1	Serine/threonine-protein kinase 24;Serine/threonine-protein kinase 24 36 kDa subunit;Serine/threonine-protein kinase 24 12 kDa subunit;Serine/threonine-protein kinase 25;Serine/threonine-protein kinase 26	STK24;STK25;STK26	Serine/threonine-protein kinase 24 (Fragment);Serine/threonine-protein kinase 24;Isoform A of Serine/threonine-protein kinase 24;Serine/threonine-protein kinase 24;Serine/threonine-protein kinase 25 (Fragment);Serine/threonine-protein kinase 24 (Fragment);	19	2	2	2	1	1	0	1	0	0	1	1	0	1	0	0	1	1	0	1	0	0	9.5	9.5	9.5	40.781	369	369;412;431;443;79;142;148;161;163;177;247;392;438;332;339;349;354;416;426	0.0075188	2.6866	4.3	4.3	0	5.1	0	0	3645800	1515400	948440	0	1181900	0
B4DUC8;Q13126-4;Q13126;Q13126-3;Q13126-2;J3QSB7;Q13126-7;Q13126-6;Q13126-5;F2Z2F3	B4DUC8;Q13126-4;Q13126;Q13126-3;Q13126-2;J3QSB7;Q13126-7;Q13126-6;Q13126-5	3;3;3;3;3;2;2;2;2;1	3;3;3;3;3;2;2;2;2;1	3;3;3;3;3;2;2;2;2;1	S-methyl-5-thioadenosine phosphorylase;Purine nucleoside phosphorylase	MTAP	S-methyl-5-thioadenosine phosphorylase;Isoform 4 of S-methyl-5-thioadenosine phosphorylase;S-methyl-5-thioadenosine phosphorylase;Isoform 3 of S-methyl-5-thioadenosine phosphorylase;Isoform 2 of S-methyl-5-thioadenosine phosphorylase;Purine nucleoside	10	3	3	3	0	0	0	1	1	3	0	0	0	1	1	3	0	0	0	1	1	3	18	18	18	33.186	300	300;280;283;334;346;242;239;293;305;143	0	24.486	0	0	0	7.7	7.7	18	28709000	0	0	0	7310600	8614000
B4DW73;Q16822;H0YML5;H0YM31;A0A0A0MS74;Q16822-2;H0YMA5;H0YMU6;H0YNG4;P35558	B4DW73;Q16822;H0YML5;H0YM31;A0A0A0MS74;Q16822-2	5;5;4;4;3;3;2;1;1;1	5;5;4;4;3;3;2;1;1;1	5;5;4;4;3;3;2;1;1;1	Phosphoenolpyruvate carboxykinase [GTP], mitochondrial	PCK2	Phosphoenolpyruvate carboxykinase [GTP], mitochondrial;Phosphoenolpyruvate carboxykinase [GTP], mitochondrial;Phosphoenolpyruvate carboxykinase [GTP], mitochondrial;Phosphoenolpyruvate carboxykinase [GTP], mitochondrial;Phosphoenolpyruvate carboxykinase [G	10	5	5	5	0	0	0	1	4	1	0	0	0	1	4	1	0	0	0	1	4	1	16.8	16.8	16.8	55.952	506	506;640;474;509;441;441;122;107;113;622	0	10.201	0	0	0	4	12.8	4	15896000	0	0	0	2308100	13588000
B4DXZ6;P51114-2;P51114;E7EU85;E9PFF5;P51114-3;C9JAJ4;C9JZE0;C9JY20;H7C4S4;R9WNI0;A8MQB8;G3V0J0;Q06787-8;Q06787-6;Q06787-2;Q06787-4;Q06787-5;Q06787-9;Q06787-7;Q06787-3;Q06787	B4DXZ6;P51114-2;P51114;E7EU85;E9PFF5;P51114-3	10;10;10;8;8;8;2;1;1;1;1;1;1;1;1;1;1;1;1;1;1;1	10;10;10;8;8;8;2;1;1;1;1;1;1;1;1;1;1;1;1;1;1;1	8;8;8;6;6;6;2;1;1;1;0;0;0;0;0;0;0;0;0;0;0;0	Fragile X mental retardation syndrome-related protein 1	FXR1	Fragile X mental retardation syndrome-related protein 1;Isoform 2 of Fragile X mental retardation syndrome-related protein 1;Fragile X mental retardation syndrome-related protein 1;Fragile X mental retardation syndrome-related protein 1;Fragile X mental re	22	10	10	8	5	5	7	5	8	8	5	5	7	5	8	8	3	5	6	5	7	6	27.3	27.3	24.7	68.326	608	608;539;621;454;490;536;151;119;123;246;544;582;592;586;590;594;603;607;611;615;620;632	0	40.337	11.7	14	20.7	16.1	22.9	21.9	118040000	15122000	7529400	22036000	20738000	25242000
B5MC59;P35244	B5MC59;P35244	1;1	1;1	1;1	Replication protein A 14 kDa subunit	RPA3	Replication protein A 14 kDa subunit;Replication protein A 14 kDa subunit	2	1	1	1	0	0	0	0	1	1	0	0	0	0	1	1	0	0	0	0	1	1	20.7	20.7	20.7	9.1703	82	82;121	0.0079545	2.5407	0	0	0	0	20.7	20.7	13396000	0	0	0	0	5649200
B5MCE7;B5MCH7;E7ETZ4;Q9Y6E2;E9PFD4;Q75MG1	B5MCE7;B5MCH7;E7ETZ4;Q9Y6E2;E9PFD4	3;3;3;3;2;1	2;2;2;2;1;1	2;2;2;2;1;1	Basic leucine zipper and W2 domain-containing protein 2	BZW2	Basic leucine zipper and W2 domain-containing protein 2;Basic leucine zipper and W2 domain-containing protein 2;Basic leucine zipper and W2 domain-containing protein 2 (Fragment);Basic leucine zipper and W2 domain-containing protein 2;BZW2 protein	6	3	2	2	2	3	1	2	1	1	1	2	0	1	1	1	1	2	0	1	1	1	11.6	8.4	8.4	26.182	225	225;343;408;419;189;274	0.00062657	3.8358	7.1	11.6	3.1	7.1	4	4	12585000	2421900	2636100	0	2226600	1154800
B5MCX3;Q15019;Q15019-3;Q15019-2;C9J2Q4;C9IY94;C9J938;H7C310;C9JB25;B5MD47;C9IZU3;C9JQJ4;H7C2Y0;C9JZI2;H7C1T1;A0A1B0GXJ2;C9JFT1;F8WB65	B5MCX3;Q15019;Q15019-3;Q15019-2;C9J2Q4;C9IY94;C9J938;H7C310;C9JB25	10;9;9;9;7;6;5;5;5;4;4;4;3;2;1;1;1;1	10;9;9;9;7;6;5;5;5;4;4;4;3;2;1;1;1;1	9;9;9;9;6;5;5;5;5;3;4;4;3;2;1;1;1;1	Septin-2	SEPT2	Septin-2;Septin-2;Isoform 3 of Septin-2;Isoform 2 of Septin-2;Septin-2 (Fragment);Septin-2 (Fragment);Septin-2 (Fragment);Septin-2 (Fragment);Septin-2 (Fragment)	18	10	10	9	7	9	5	8	7	9	7	9	5	8	7	9	6	8	5	7	7	8	47	47	44.2	36.94	321	321;361;371;396;184;121;148;161;173;94;131;147;188;105;29;71;72;80	0	87.369	34.6	43.9	25.2	39.6	36.8	42.7	361080000	61644000	29272000	41630000	71154000	77245000
B5MDF5;P62826;J3KQE5;F5H018;B4DV51;H0YFC6;A0A087X0W0	B5MDF5;P62826;J3KQE5;F5H018;B4DV51	10;10;9;8;5;4;1	10;10;9;8;5;4;1	10;10;9;8;5;4;1	GTP-binding nuclear protein Ran	RAN	GTP-binding nuclear protein Ran;GTP-binding nuclear protein Ran;GTP-binding nuclear protein Ran (Fragment);GTP-binding nuclear protein Ran (Fragment);GTP-binding nuclear protein Ran	7	10	10	10	8	8	8	7	6	6	8	8	8	7	6	6	8	8	8	7	6	6	44.6	44.6	44.6	26.224	233	233;216;234;198;128;103;53	0	55.177	39.1	41.2	39.9	35.6	31.3	31.3	1054200000	206700000	106890000	224390000	177350000	167400000
Q99613;B5ME19;Q99613-2;H3BPE3;H3BTY8;H3BPE4	Q99613;B5ME19;Q99613-2	9;9;8;2;1;1	9;9;8;2;1;1	9;9;8;2;1;1	Eukaryotic translation initiation factor 3 subunit C;Eukaryotic translation initiation factor 3 subunit C-like protein	EIF3C;EIF3CL	Eukaryotic translation initiation factor 3 subunit C;Eukaryotic translation initiation factor 3 subunit C-like protein;Isoform 2 of Eukaryotic translation initiation factor 3 subunit C	6	9	9	9	7	3	6	0	0	0	7	3	6	0	0	0	7	3	6	0	0	0	14.2	14.2	14.2	105.34	913	913;914;903;132;79;148	0	25.789	9.7	3.9	10.5	0	0	0	43336000	15515000	3558500	24263000	0	0
E7EW69;E7EX04;B5ME97;Q9P0V9;Q9P0V9-2;Q9P0V9-3;F5GYV2;C9JEW2;C9JNR7;F5H1F2	E7EW69;E7EX04;B5ME97;Q9P0V9;Q9P0V9-2;Q9P0V9-3	4;4;4;4;4;3;1;1;1;1	3;3;3;3;3;2;1;1;1;1	3;3;3;3;3;2;1;1;1;1	Septin-10	SEPT10	Septin-10;Septin-10;Septin 10, isoform CRA_c;Septin-10;Isoform 2 of Septin-10;Isoform 3 of Septin-10	10	4	3	3	0	1	2	1	0	2	0	1	2	1	0	1	0	1	2	1	0	1	12.9	8.7	8.7	52.145	450	450;473;544;454;503;431;26;57;61;98	0.00067249	5.0189	0	2	5.1	3.6	0	7.3	3929900	0	607550	2341400	980940	0
K7EIJ4;B7Z7F3;Q9H6Z4-3;Q9H6Z4-2;Q9H6Z4	K7EIJ4;B7Z7F3;Q9H6Z4-3;Q9H6Z4-2;Q9H6Z4	2;2;2;2;2	2;2;2;2;2	2;2;2;2;2	Ran-binding protein 3	RANBP3	Ran-binding protein 3 (Fragment);Ran-binding protein 3;Isoform 3 of Ran-binding protein 3;Isoform 2 of Ran-binding protein 3;Ran-binding protein 3	5	2	2	2	0	0	1	0	0	2	0	0	1	0	0	2	0	0	1	0	0	2	17.4	17.4	17.4	16.965	155	155;494;499;562;567	0.00064767	4.3251	0	0	7.7	0	0	17.4	0	0	0	0	0	0
B7Z7P8;P62495-2;P62495;I3L492;D6RCB3;D6RJE8	B7Z7P8;P62495-2;P62495	9;9;9;2;1;1	9;9;9;2;1;1	9;9;9;2;1;1	Eukaryotic peptide chain release factor subunit 1	ETF1	Eukaryotic peptide chain release factor subunit 1;Isoform 2 of Eukaryotic peptide chain release factor subunit 1;Eukaryotic peptide chain release factor subunit 1	6	9	9	9	7	8	6	6	6	3	7	8	6	6	6	3	7	8	6	6	6	3	27.7	27.7	27.7	47.475	423	423;404;437;208;95;119	0	30.435	21.7	24.8	20.1	18.7	16.3	10.9	85466000	21107000	7206800	14548000	21363000	6177100
B7Z934;Q9HAK2	B7Z934;Q9HAK2	1;1	1;1	1;1	Transcription factor COE2	EBF2	Transcription factor COE2;Transcription factor COE2	2	1	1	1	1	1	1	1	1	1	1	1	1	1	1	1	1	1	1	1	1	1	2.6	2.6	2.6	45.967	427	427;575	0.00062422	3.8033	2.6	2.6	2.6	2.6	2.6	2.6	65145000	12190000	0	11113000	13678000	13384000
B7ZC39;B7ZC38;Q9NR46;Q9NR46-2	B7ZC39;B7ZC38;Q9NR46;Q9NR46-2	2;2;2;2	2;2;2;2	2;2;2;2	Endophilin-B2	SH3GLB2	Endophilin-B2;Endophilin-B2;Endophilin-B2;Isoform 2 of Endophilin-B2	4	2	2	2	0	0	1	0	1	2	0	0	1	0	1	2	0	0	1	0	1	2	8	8	8	41.668	374	374;400;395;404	0.0006812	5.2997	0	0	4	0	4	8	11298000	0	0	4394400	0	2723800
B8ZZB8;Q96F85-2;Q96F85	B8ZZB8;Q96F85-2;Q96F85	1;1;1	1;1;1	1;1;1	CB1 cannabinoid receptor-interacting protein 1	CNRIP1	CB1 cannabinoid receptor-interacting protein 1;Isoform 2 of CB1 cannabinoid receptor-interacting protein 1;CB1 cannabinoid receptor-interacting protein 1	3	1	1	1	0	0	0	1	1	0	0	0	0	1	1	0	0	0	0	1	1	0	11.7	11.7	11.7	15.167	137	137;128;164	0.00062617	3.8299	0	0	0	11.7	11.7	0	3158000	0	0	0	0	3158000
B8ZZQ6;P06454-2;P06454;B8ZZA1;B8ZZW7;H7C2N1	B8ZZQ6;P06454-2;P06454;B8ZZA1;B8ZZW7;H7C2N1	4;4;4;3;3;3	4;4;4;3;3;3	4;4;4;3;3;3	Prothymosin alpha;Prothymosin alpha, N-terminally processed;Thymosin alpha-1	PTMA	Prothymosin alpha;Isoform 2 of Prothymosin alpha;Prothymosin alpha;Prothymosin alpha;Prothymosin alpha;Prothymosin alpha (Fragment)	6	4	4	4	1	1	0	3	3	3	1	1	0	3	3	3	1	1	0	3	3	3	35.5	35.5	35.5	11.758	107	107;110;111;131;136;148	0	26.087	13.1	13.1	0	35.5	34.6	34.6	46320000	7251200	1522600	0	24469000	10776000
B8ZZU8;Q15370;I3L0M9;Q15370-2;A0A0B4J296	B8ZZU8;Q15370;I3L0M9;Q15370-2	4;4;3;3;1	4;4;3;3;1	4;4;3;3;1	Transcription elongation factor B polypeptide 2	TCEB2	Elongin-B;Elongin-B;Elongin-B (Fragment);Isoform 2 of Elongin-B	5	4	4	4	2	1	2	3	3	2	2	1	2	3	3	2	2	1	2	3	3	2	61.9	61.9	61.9	12.527	113	113;118;140;161;66	0	15.504	17.7	11.5	17.7	51.3	28.3	45.1	82658000	10642000	2714900	15219000	13924000	20605000
B8ZZX6;Q658P3-4;Q658P3-3;Q658P3;Q658P3-2	B8ZZX6;Q658P3-4;Q658P3-3;Q658P3;Q658P3-2	2;2;2;2;2	2;2;2;2;2	2;2;2;2;2	Metalloreductase STEAP3	STEAP3	Metalloreductase STEAP3;Isoform 4 of Metalloreductase STEAP3;Isoform 3 of Metalloreductase STEAP3;Metalloreductase STEAP3;Isoform 2 of Metalloreductase STEAP3	5	2	2	2	2	1	1	0	0	0	2	1	1	0	0	0	2	1	1	0	0	0	6.3	6.3	6.3	50.628	457	457;456;487;488;498	0.00074571	7.2391	6.3	3.7	3.7	0	0	0	35550000	10526000	4875600	20148000	0	0
B8ZZZ7;Q9NUQ6-2;Q9NUQ6;Q9NUQ6-4;Q9NUQ6-3;F8W6C2	B8ZZZ7;Q9NUQ6-2;Q9NUQ6;Q9NUQ6-4;Q9NUQ6-3;F8W6C2	2;2;2;2;2;1	2;2;2;2;2;1	2;2;2;2;2;1	SPATS2-like protein	SPATS2L	DNA polymerase-transactivated protein 6, isoform CRA_b;Isoform 2 of SPATS2-like protein;SPATS2-like protein;Isoform 4 of SPATS2-like protein;Isoform 3 of SPATS2-like protein;SPATS2-like protein (Fragment)	6	2	2	2	2	0	0	1	1	1	2	0	0	1	1	1	2	0	0	1	1	1	6	6	6	54.945	498	498;489;558;566;588;265	0.00072411	6.5965	6	0	0	3.4	2.6	3.4	14063000	5431700	0	0	8631100	0
C9J3L8;C9J5W0;E9PAL7;C9IZQ1;P43307-2;P43307	C9J3L8;C9J5W0;E9PAL7;C9IZQ1;P43307-2;P43307	1;1;1;1;1;1	1;1;1;1;1;1	1;1;1;1;1;1	Translocon-associated protein subunit alpha	SSR1	Translocon-associated protein subunit alpha;Translocon-associated protein subunit alpha;Translocon-associated protein subunit alpha;Translocon-associated protein subunit alpha;Isoform 2 of Translocon-associated protein subunit alpha;Translocon-associated p	6	1	1	1	1	0	1	0	0	0	1	0	1	0	0	0	1	0	1	0	0	0	5.7	5.7	5.7	29.573	265	265;266;291;298;259;286	0.0006854	5.3709	5.7	0	5.7	0	0	0	0	0	0	0	0	0
H0YDJ4;H9KV85;C9J066;Q8N4C6-11;Q8N4C6-4;Q8N4C6-9;Q8N4C6-2;Q8N4C6;Q8N4C6-5;Q8N4C6-10;Q8N4C6-7	H0YDJ4;H9KV85;C9J066;Q8N4C6-11;Q8N4C6-4;Q8N4C6-9;Q8N4C6-2;Q8N4C6;Q8N4C6-5;Q8N4C6-10;Q8N4C6-7	2;2;2;2;2;2;2;2;2;2;2	1;1;1;1;1;1;1;1;1;1;1	1;1;1;1;1;1;1;1;1;1;1	Ninein	NIN	Ninein (Fragment);Ninein (Fragment);Ninein;Isoform 9 of Ninein;Isoform 4 of Ninein;Isoform 8 of Ninein;Isoform 2 of Ninein;Ninein;Isoform 5 of Ninein;Isoform 3 of Ninein;Isoform 7 of Ninein	11	2	1	1	1	1	0	2	0	1	1	1	0	1	0	0	1	1	0	1	0	0	1.6	1	1	179.44	1537	1537;1581;2046;1377;2029;2052;2073;2090;2096;2116;2133	0.007941	2.5317	1	1	0	1.6	0	0.6	36470000	18188000	14207000	0	4074900	0
C9JRU6;C9J0B2;C9JUW4;C9J8R4;C9JVE2;Q96GG9	C9JRU6;C9J0B2;C9JUW4;C9J8R4;C9JVE2;Q96GG9	1;1;1;1;1;1	1;1;1;1;1;1	1;1;1;1;1;1	DCN1-like protein;DCN1-like protein 1	DCUN1D1	DCN1-like protein (Fragment);DCN1-like protein (Fragment);DCN1-like protein (Fragment);DCN1-like protein (Fragment);DCN1-like protein;DCN1-like protein 1	6	1	1	1	0	0	0	0	0	1	0	0	0	0	0	1	0	0	0	0	0	1	16	16	16	8.7797	75	75;92;98;128;244;259	0.007932	2.5145	0	0	0	0	0	16	0	0	0	0	0	0
C9J0K6;P30626-2;P30626;P30626-3;B4DHQ6	C9J0K6;P30626-2;P30626;P30626-3;B4DHQ6	9;9;9;7;6	9;9;9;7;6	9;9;9;7;6	Sorcin	SRI	Sorcin;Isoform 2 of Sorcin;Sorcin;Isoform 3 of Sorcin;Sorcin	5	9	9	9	3	3	2	8	8	3	3	3	2	8	8	3	3	3	2	8	8	3	69	69	69	17.605	155	155;183;198;180;158	0	22.649	20	20	12.3	69	56.1	20	129800000	11135000	6490300	3477700	47145000	39213000
C9J151;H0Y5T1;F8WA11;Q7Z460-2;Q7Z460-4;Q7Z460-5;Q7Z460-3;Q7Z460	C9J151;H0Y5T1;F8WA11;Q7Z460-2;Q7Z460-4;Q7Z460-5;Q7Z460-3;Q7Z460	1;1;1;1;1;1;1;1	1;1;1;1;1;1;1;1	1;1;1;1;1;1;1;1	CLIP-associating protein 1	CLASP1	CLIP-associating protein 1 (Fragment);CLIP-associating protein 1 (Fragment);CLIP-associating protein 1;Isoform 2 of CLIP-associating protein 1;Isoform 4 of CLIP-associating protein 1;Isoform 5 of CLIP-associating protein 1;Isoform 3 of CLIP-associating pro	8	1	1	1	0	0	1	1	1	1	0	0	1	1	1	1	0	0	1	1	1	1	12	12	12	16.48	150	150;1275;1478;1471;1477;1479;1494;1538	0.0007758	8.1058	0	0	12	12	12	12	8959800	0	0	5568800	0	0
H7C5M9;C9JSA3;C9JND6;C9J363;C9J6F3;C9J5C3;Q9BUL8	H7C5M9;C9JSA3;C9JND6;C9J363;C9J6F3;C9J5C3;Q9BUL8	2;2;2;2;2;2;2	2;2;2;2;2;2;2	2;2;2;2;2;2;2	Programmed cell death protein 10	PDCD10	Programmed cell death protein 10 (Fragment);Programmed cell death protein 10 (Fragment);Programmed cell death protein 10 (Fragment);Programmed cell death 10, isoform CRA_b;Programmed cell death protein 10;Programmed cell death protein 10 (Fragment);Program	7	2	2	2	1	0	0	1	0	0	1	0	0	1	0	0	1	0	0	1	0	0	29.5	29.5	29.5	14.117	122	122;134;146;149;186;202;212	0.006429	2.772	19.7	0	0	9.8	0	0	5464000	5464000	0	0	0	0
C9J4Z3;P61513;M0R0A1;Q6P4E4;E9PEL3;M0R2L6;G5E9R3;A6NKH3	C9J4Z3;P61513;M0R0A1;Q6P4E4;E9PEL3;M0R2L6	3;3;2;2;2;2;1;1	3;3;2;2;2;2;1;1	3;3;2;2;2;2;1;1	60S ribosomal protein L37a	RPL37A	60S ribosomal protein L37a;60S ribosomal protein L37a;60S ribosomal protein L37a;60S ribosomal protein L37a;60S ribosomal protein L37a;60S ribosomal protein L37a	8	3	3	3	3	3	3	2	3	2	3	3	3	2	3	2	3	3	3	2	3	2	55.9	55.9	55.9	7.624	68	68;92;60;72;75;88;58;93	0	26.765	55.9	55.9	55.9	44.1	55.9	44.1	142560000	31380000	19128000	41674000	15988000	20614000
C9JJV6;C9JZL8;C9J5M0;C9JC07;Q96S97	C9JJV6;C9JZL8;C9J5M0;C9JC07;Q96S97	1;1;1;1;1	1;1;1;1;1	1;1;1;1;1	Myeloid-associated differentiation marker	MYADM	Myeloid-associated differentiation marker (Fragment);Myeloid-associated differentiation marker (Fragment);Myeloid-associated differentiation marker (Fragment);Myeloid-associated differentiation marker (Fragment);Myeloid-associated differentiation marker	5	1	1	1	0	0	0	1	0	1	0	0	0	1	0	1	0	0	0	1	0	1	15.8	15.8	15.8	15.864	146	146;188;242;259;322	0.0090498	2.4841	0	0	0	15.8	0	15.8	0	0	0	0	0	0
C9J6P4;Q7Z2W4-3;Q7Z2W4-2;Q7Z2W4	C9J6P4;Q7Z2W4-3;Q7Z2W4-2;Q7Z2W4	1;1;1;1	1;1;1;1	1;1;1;1	Zinc finger CCCH-type antiviral protein 1	ZC3HAV1	Zinc finger CCCH-type antiviral protein 1;Isoform 3 of Zinc finger CCCH-type antiviral protein 1;Isoform 2 of Zinc finger CCCH-type antiviral protein 1;Zinc finger CCCH-type antiviral protein 1	4	1	1	1	1	0	0	0	0	0	1	0	0	0	0	0	1	0	0	0	0	0	1.4	1.4	1.4	114.08	1024	1024;624;699;902	0.0075231	2.689	1.4	0	0	0	0	0	0	0	0	0	0	0
E9PFH4;C9J7E5;Q9Y5L0-5;Q9Y5L0-3;Q9Y5L0;Q9Y5L0-1	E9PFH4;C9J7E5;Q9Y5L0-5;Q9Y5L0-3;Q9Y5L0;Q9Y5L0-1	1;1;1;1;1;1	1;1;1;1;1;1	1;1;1;1;1;1	Transportin-3	TNPO3	Transportin-3;Transportin-3;Isoform 4 of Transportin-3;Isoform 3 of Transportin-3;Transportin-3;Isoform 1 of Transportin-3	6	1	1	1	0	1	0	0	0	0	0	1	0	0	0	0	0	1	0	0	0	0	2.3	2.3	2.3	96.669	857	857;957;859;909;923;957	0.0042042	3.1581	0	2.3	0	0	0	0	1906400	0	1906400	0	0	0
C9J8H1;P36543-2;P36543;P36543-3	C9J8H1;P36543-2;P36543;P36543-3	2;2;2;1	2;2;2;1	2;2;2;1	V-type proton ATPase subunit E 1	ATP6V1E1	V-type proton ATPase subunit E 1 (Fragment);Isoform 2 of V-type proton ATPase subunit E 1;V-type proton ATPase subunit E 1;Isoform 3 of V-type proton ATPase subunit E 1	4	2	2	2	1	0	0	1	2	0	1	0	0	1	2	0	1	0	0	1	2	0	12.3	12.3	12.3	23.539	203	203;204;226;196	0.0036452	3.3013	5.4	0	0	6.9	12.3	0	4823100	1163100	0	0	0	3660000
C9JA28;Q9UNL2;Q9UNL2-2	C9JA28;Q9UNL2;Q9UNL2-2	1;1;1	1;1;1	1;1;1	Translocon-associated protein subunit gamma	SSR3	Translocon-associated protein subunit gamma;Translocon-associated protein subunit gamma;Isoform 2 of Translocon-associated protein subunit gamma	3	1	1	1	1	0	0	1	0	0	1	0	0	1	0	0	1	0	0	1	0	0	8	8	8	20.161	174	174;185;198	0.00067385	5.0825	8	0	0	8	0	0	1945200	0	0	0	1945200	0
F8WE26;C9JAZ1;O75431	F8WE26;C9JAZ1;O75431	1;1;1	1;1;1	1;1;1	Metaxin-2	MTX2	Metaxin-2;Metaxin-2 (Fragment);Metaxin-2	3	1	1	1	1	1	1	1	1	1	1	1	1	1	1	1	1	1	1	1	1	1	62.2	62.2	62.2	4.8174	45	45;229;263	0	18.083	62.2	62.2	62.2	62.2	62.2	62.2	22914000	3790500	2716900	3305900	4090900	3741300
C9JD73;H7C003;Q15435;B5MBZ8;C9J177;Q15435-3;Q15435-2;H7C118;C9JRC4;Q15435-5;Q15435-4	C9JD73;H7C003;Q15435;B5MBZ8;C9J177;Q15435-3;Q15435-2	3;3;3;2;2;2;2;1;1;1;1	3;3;3;2;2;2;2;1;1;1;1	3;3;3;2;2;2;2;1;1;1;1	Protein phosphatase 1 regulatory subunit 7	PPP1R7	Protein phosphatase 1 regulatory subunit 7 (Fragment);Protein phosphatase 1 regulatory subunit 7 (Fragment);Protein phosphatase 1 regulatory subunit 7;Protein phosphatase 1 regulatory subunit 7;Protein phosphatase 1 regulatory subunit 7 (Fragment);Isoform	11	3	3	3	0	0	1	3	1	1	0	0	1	3	1	1	0	0	1	3	1	1	19.5	19.5	19.5	32.39	282	282;335;360;274;289;280;317;140;184;221;237	0	15.249	0	0	6.4	19.5	3.5	6.4	12041000	0	0	2368000	8055600	1617400
C9JEJ2;P49585;C9J050;H7C1T3;H7BZN1;Q9Y5K3-2;Q9Y5K3-4;Q9Y5K3-3;Q9Y5K3;C9J2E1;C9JVS0;C9JPY0;F8WAZ5;F2Z2B1	C9JEJ2;P49585;C9J050;H7C1T3;H7BZN1	7;7;6;5;4;3;3;3;3;2;1;1;1;1	7;7;6;5;4;3;3;3;3;2;1;1;1;1	7;7;6;5;4;3;3;3;3;2;1;1;1;1	Choline-phosphate cytidylyltransferase A	PCYT1A	Choline-phosphate cytidylyltransferase A;Choline-phosphate cytidylyltransferase A;Choline-phosphate cytidylyltransferase A (Fragment);Choline-phosphate cytidylyltransferase A (Fragment);Choline-phosphate cytidylyltransferase A (Fragment)	14	7	7	7	2	2	2	4	2	4	2	2	2	4	2	4	2	2	2	4	2	4	25.8	25.8	25.8	43.263	380	380;367;293;201;137;330;351;351;369;212;115;133;134;177	0	18.468	6.1	5	5	15.5	8.2	13.2	98972000	21277000	2248500	3472400	31372000	5614300
C9JFR7;P99999	C9JFR7;P99999	6;6	6;6	6;6	Cytochrome c	CYCS	Cytochrome c (Fragment);Cytochrome c	2	6	6	6	6	6	6	6	6	6	6	6	6	6	6	6	6	6	6	6	6	6	57.4	57.4	57.4	11.333	101	101;105	0	47.69	57.4	57.4	57.4	57.4	57.4	57.4	332940000	64339000	22698000	65219000	56919000	53001000
C9JWQ9;F8WAR1;C9JRN3;C9JHG2;G3XAJ6;Q14699	C9JWQ9;F8WAR1;C9JRN3;C9JHG2;G3XAJ6;Q14699	1;1;1;1;1;1	1;1;1;1;1;1	1;1;1;1;1;1	Raftlin	RFTN1	Raftlin (Fragment);Raftlin;Raftlin (Fragment);Raftlin (Fragment);Raft-linking protein, isoform CRA_c;Raftlin	6	1	1	1	0	0	0	1	0	1	0	0	0	1	0	1	0	0	0	1	0	1	25.4	25.4	25.4	13.071	114	114;117;149;275;542;578	0.0007734	8.0564	0	0	0	25.4	0	25.4	10241000	0	0	0	6438800	0
C9JIF9;P13798;H7C1U0;F8WEH5;C9JLK2;H7C393	C9JIF9;P13798	7;7;3;1;1;1	7;7;3;1;1;1	7;7;3;1;1;1	Acylamino-acid-releasing enzyme	APEH	Acylamino-acid-releasing enzyme;Acylamino-acid-releasing enzyme	6	7	7	7	1	1	3	2	3	2	1	1	3	2	3	2	1	1	3	2	3	2	15.3	15.3	15.3	81.673	737	737;732;308;50;232;284	0	11.544	1.6	3.1	7.9	5.4	6.6	4.6	50529000	1586800	2838800	23012000	2918800	8828300
C9JJ19;P82930	C9JJ19;P82930	1;1	1;1	1;1	28S ribosomal protein S34, mitochondrial	MRPS34	28S ribosomal protein S34, mitochondrial;28S ribosomal protein S34, mitochondrial	2	1	1	1	0	0	0	0	0	1	0	0	0	0	0	1	0	0	0	0	0	1	12	12	12	26.332	225	225;218	0.0079275	2.4998	0	0	0	0	0	12	3180300	0	0	0	0	0
C9JJ34;P43487-2;P43487;F6WQW2;C9JXG8;C9JDM3;C9JGV6;C9JIC6	C9JJ34;P43487-2;P43487;F6WQW2;C9JXG8;C9JDM3;C9JGV6	4;4;4;3;2;2;2;1	4;4;4;3;2;2;2;1	4;4;4;3;2;2;2;1	Ran-specific GTPase-activating protein	RANBP1	Ran-specific GTPase-activating protein (Fragment);Isoform 2 of Ran-specific GTPase-activating protein;Ran-specific GTPase-activating protein;Ran-specific GTPase-activating protein;Ran-specific GTPase-activating protein (Fragment);Ran-specific GTPase-activa	8	4	4	4	1	2	4	3	3	2	1	2	4	3	3	2	1	2	4	3	3	2	48.5	48.5	48.5	18.762	163	163;200;201;278;145;165;204;53	0	61.207	14.1	20.9	48.5	41.7	41.7	35	340810000	27371000	16354000	43547000	83306000	84962000
C9JJT5;C9JU26;G3V325;P56134-4;P56134-3;P56134-2;P56134	C9JJT5;C9JU26;G3V325;P56134-4;P56134-3;P56134-2;P56134	1;1;1;1;1;1;1	1;1;1;1;1;1;1	1;1;1;1;1;1;1	ATP synthase subunit f, mitochondrial	ATP5J2-PTCD1;ATP5J2	ATP5MF-PTCD1 readthrough;ATP synthase membrane subunit f;ATP5MF-PTCD1 readthrough;Isoform 4 of ATP synthase subunit f, mitochondrial;Isoform 3 of ATP synthase subunit f, mitochondrial;Isoform 2 of ATP synthase subunit f, mitochondrial;ATP synthase subunit	7	1	1	1	1	0	1	0	0	1	1	0	1	0	0	1	1	0	1	0	0	1	20.4	20.4	20.4	5.9149	54	54;98;749;49;55;88;94	0.0036188	3.2053	20.4	0	20.4	0	0	20.4	2153100	0	0	0	0	0
C9JL85;P58546	C9JL85;P58546	2;2	2;2	2;2	Myotrophin	MTPN	Myotrophin;Myotrophin	2	2	2	2	1	2	1	2	2	1	1	2	1	2	2	1	1	2	1	2	2	1	51.9	51.9	51.9	5.7044	52	52;118	0	8.961	19.2	51.9	19.2	51.9	51.9	32.7	36087000	4552500	5241000	3851100	7123700	13761000
C9JLU1;P52434-3;P52434;P52434-4	C9JLU1;P52434-3;P52434;P52434-4	2;2;2;2	2;2;2;2	2;2;2;2	DNA-directed RNA polymerases I, II, and III subunit RPABC3	POLR2H	DNA-directed RNA polymerases I, II, and III subunit RPABC3 (Fragment);Isoform 3 of DNA-directed RNA polymerases I, II, and III subunit RPABC3;DNA-directed RNA polymerases I, II, and III subunit RPABC3;Isoform 4 of DNA-directed RNA polymerases I, II, and II	4	2	2	2	1	2	1	0	1	1	1	2	1	0	1	1	1	2	1	0	1	1	27	27	27	16.925	148	148;114;150;175	0	10.731	8.8	27	8.8	0	8.8	8.8	1369200	0	1369200	0	0	0
J3QL22;J3QS85;J3KTQ1;J3QKR0;C9JLV5;Q9UNS2	J3QL22;J3QS85;J3KTQ1;J3QKR0;C9JLV5;Q9UNS2	1;1;1;1;1;1	1;1;1;1;1;1	1;1;1;1;1;1	COP9 signalosome complex subunit 3	COPS3	COP9 signalosome complex subunit 3;COP9 signalosome complex subunit 3;COP9 signalosome complex subunit 3;COP9 signalosome complex subunit 3;COP9 signalosome complex subunit 3 (Fragment);COP9 signalosome complex subunit 3	6	1	1	1	1	1	1	1	1	1	1	1	1	1	1	1	1	1	1	1	1	1	60	60	60	2.1494	20	20;31;107;116;318;423	0	18.921	60	60	60	60	60	60	31379000	2465900	1272800	13225000	3660900	5478700
C9JXB8;C9JNW5;P83731	C9JXB8;C9JNW5;P83731	5;5;5	5;5;5	5;5;5	60S ribosomal protein L24	RPL24	60S ribosomal protein L24;60S ribosomal protein L24;60S ribosomal protein L24	3	5	5	5	3	3	4	4	4	3	3	3	4	4	4	3	3	3	4	4	4	3	39.7	39.7	39.7	14.369	121	121;150;157	0	20.507	25.6	26.4	33.1	33.1	32.2	25.6	205130000	24672000	13057000	34917000	49260000	40548000
G5E9W8;C9JQ42;P46976-3;P46976-2;P46976	G5E9W8;C9JQ42;P46976-3;P46976-2;P46976	1;1;1;1;1	1;1;1;1;1	1;1;1;1;1	Glycogenin-1	GYG1	Glycogenin 1, isoform CRA_e;Glycogenin-1 (Fragment);Isoform GN-1S of Glycogenin-1;Isoform GN-1 of Glycogenin-1;Glycogenin-1	5	1	1	1	1	1	1	0	0	1	1	1	1	0	0	1	1	1	1	0	0	1	7.3	7.3	7.3	21.51	193	193;265;279;333;350	0.00062696	3.8424	7.3	7.3	7.3	0	0	7.3	0	0	0	0	0	0
C9JQD4;O43447;H0YEL5;O43447-2;A6NM32	C9JQD4;O43447;H0YEL5;O43447-2	3;3;2;2;1	3;3;2;2;1	3;3;2;2;1	Peptidyl-prolyl cis-trans isomerase;Peptidyl-prolyl cis-trans isomerase H	PPIH	Peptidyl-prolyl cis-trans isomerase (Fragment);Peptidyl-prolyl cis-trans isomerase H;Peptidyl-prolyl cis-trans isomerase (Fragment);Isoform 2 of Peptidyl-prolyl cis-trans isomerase H	5	3	3	3	1	1	0	1	0	0	1	1	0	1	0	0	1	1	0	1	0	0	22.9	22.9	22.9	15.8	144	144;177;96;134;57	0.0024525	3.5074	6.9	6.2	0	9.7	0	0	6709300	2639200	1440000	0	2630100	0
C9JQR6;H0Y8F1;Q13308-3;Q13308-4;Q13308-2;Q13308;Q13308-6	C9JQR6;H0Y8F1;Q13308-3;Q13308-4;Q13308-2;Q13308;Q13308-6	2;2;2;2;2;2;2	2;2;2;2;2;2;2	2;2;2;2;2;2;2	Inactive tyrosine-protein kinase 7	PTK7	Inactive tyrosine-protein kinase 7 (Fragment);Inactive tyrosine-protein kinase 7 (Fragment);Isoform 3 of Inactive tyrosine-protein kinase 7;Isoform 4 of Inactive tyrosine-protein kinase 7;Isoform 2 of Inactive tyrosine-protein kinase 7;Inactive tyrosine-pr	7	2	2	2	0	0	0	2	1	1	0	0	0	2	1	1	0	0	0	2	1	1	12.8	12.8	12.8	28.572	257	257;365;940;1014;1030;1070;1078	0.00073421	6.9631	0	0	0	12.8	5.8	5.8	10891000	0	0	0	3434700	4220000
C9JRL4	C9JRL4	6	1	1		MDH1	Malate dehydrogenase, cytoplasmic (Fragment)	1	6	1	1	5	3	4	3	5	4	1	1	1	0	1	1	1	1	1	0	1	1	65.5	16.8	16.8	12.973	119	119	0	20.142	59.7	37.8	48.7	31.9	54.6	48.7	65835000	15902000	4957800	27848000	0	10959000
C9JYQ9;H0Y8C2;Q6P5R6	C9JYQ9;H0Y8C2;Q6P5R6	1;1;1	1;1;1	1;1;1	60S ribosomal protein L22-like 1	RPL22L1	60S ribosomal protein L22-like 1;60S ribosomal protein L22-like 1 (Fragment);60S ribosomal protein L22-like 1	3	1	1	1	1	1	1	0	0	0	1	1	1	0	0	0	1	1	1	0	0	0	19.8	19.8	19.8	14.478	121	121;142;122	0	10.319	19.8	19.8	19.8	0	0	0	58180000	14706000	10700000	32773000	0	0
C9JZR2;O60716-24;O60716-23;O60716-21;O60716-19;O60716-22;O60716-20;O60716-16;O60716-18;O60716-15;O60716-17;O60716-13;O60716-11;O60716-14;O60716-12;O60716-10;O60716-8;O60716-9;O60716-7;O60716-5;O60716-3;O60716-6;O60716-4;O60716-2;O60716;O60716-32;O60716-31;O60716-29;O60716-27;O60716-30;O60716-28;O60716-26;O60716-25;E9PRE2;E9PKY0	C9JZR2;O60716-24;O60716-23;O60716-21;O60716-19;O60716-22;O60716-20;O60716-16;O60716-18;O60716-15;O60716-17;O60716-13;O60716-11;O60716-14;O60716-12;O60716-10;O60716-8;O60716-9;O60716-7;O60716-5;O60716-3;O60716-6;O60716-4;O60716-2;O60716;O60716-32;O60716-31;O60716-29;O60716-27;O60716-30;O60716-28;O60716-26;O60716-25	10;10;10;10;10;10;10;10;10;10;10;10;10;10;10;10;10;10;10;10;10;10;10;10;10;8;8;8;8;8;8;8;8;2;1	10;10;10;10;10;10;10;10;10;10;10;10;10;10;10;10;10;10;10;10;10;10;10;10;10;8;8;8;8;8;8;8;8;2;1	10;10;10;10;10;10;10;10;10;10;10;10;10;10;10;10;10;10;10;10;10;10;10;10;10;8;8;8;8;8;8;8;8;2;1	Catenin delta-1	CTNND1	Catenin delta-1;Isoform 3 of Catenin delta-1;Isoform 3C of Catenin delta-1;Isoform 3A of Catenin delta-1;Isoform 3AC of Catenin delta-1;Isoform 3B of Catenin delta-1;Isoform 3BC of Catenin delta-1;Isoform 2 of Catenin delta-1;Isoform 3AB of Catenin delta-1	35	10	10	10	2	0	4	6	7	5	2	0	4	6	7	5	2	0	4	6	7	5	14.3	14.3	14.3	104.85	938	938;811;817;832;838;840;846;858;861;864;867;879;885;887;893;908;912;914;918;933;939;941;947;962;968;589;595;610;616;618;624;639;645;261;126	0	19.329	2.7	0	5.5	8.1	10.3	7.1	75382000	3645600	0	4976400	15391000	19293000
F8WBS5;F8WB72;C9K025;P18077	F8WBS5;F8WB72;C9K025;P18077	3;3;3;3	3;3;3;3	3;3;3;3	60S ribosomal protein L35a	RPL35A	60S ribosomal protein L35a;60S ribosomal protein L35a;60S ribosomal protein L35a (Fragment);60S ribosomal protein L35a	4	3	3	3	2	3	2	1	2	2	2	3	2	1	2	2	2	3	2	1	2	2	41.8	41.8	41.8	6.4725	55	55;57;94;110	0.00069686	5.6865	29.1	41.8	29.1	12.7	29.1	29.1	45520000	15298000	4137000	8414700	0	9769100
D3DQV9;P78344;H0Y3P2;P78344-2;E9PKF8;H0YCH5;H0YEC5;H0YD77;H0YE22	D3DQV9;P78344;H0Y3P2;P78344-2	13;13;12;12;6;4;3;3;2	13;13;12;12;6;4;3;3;2	13;13;12;12;6;4;3;3;2	Eukaryotic translation initiation factor 4 gamma 2	EIF4G2	Eukaryotic translation initiation factor 4 gamma 2 (Fragment);Eukaryotic translation initiation factor 4 gamma 2;Eukaryotic translation initiation factor 4 gamma 2;Isoform 2 of Eukaryotic translation initiation factor 4 gamma 2	9	13	13	13	3	2	5	5	8	6	3	2	5	5	8	6	3	2	5	5	8	6	17.2	17.2	17.2	102.33	907	907;907;869;869;185;444;244;282;234	0	22.597	6.1	2.1	8	6.2	9.4	8.2	59535000	9805500	2088200	6146400	11786000	12586000
D3YTB1;F8W727;P62910;D3YTI8	D3YTB1;F8W727;P62910	5;5;5;1	5;5;5;1	5;5;5;1	60S ribosomal protein L32	RPL32	60S ribosomal protein L32 (Fragment);60S ribosomal protein L32;60S ribosomal protein L32	4	5	5	5	4	4	5	5	5	5	4	4	5	5	5	5	4	4	5	5	5	5	41.4	41.4	41.4	15.616	133	133;153;135;62	0	27.683	30.8	30.8	41.4	41.4	41.4	41.4	327660000	56034000	22245000	53101000	60239000	56403000
D4Q8H0;Q9NYL2-3;Q9NYL2-2;Q9NYL2;C9J3F7	D4Q8H0;Q9NYL2-3;Q9NYL2-2;Q9NYL2;C9J3F7	5;5;5;5;3	5;5;5;5;3	5;5;5;5;3	Mitogen-activated protein kinase kinase kinase MLT	pk;ZAK	Mitogen-activated protein kinase kinase kinase MLT;Isoform 3 of Mitogen-activated protein kinase kinase kinase 20;Isoform 2 of Mitogen-activated protein kinase kinase kinase 20;Mitogen-activated protein kinase kinase kinase 20;Mitogen-activated protein kin	5	5	5	5	1	0	2	0	3	1	1	0	2	0	3	1	1	0	2	0	3	1	16.5	16.5	16.5	51.582	455	455;312;455;800;138	0.0007446	7.2166	4	0	8.4	0	9.7	2.4	18195000	4618700	0	4606200	0	7925100
H0Y9C2;D6R938;E9PBG7;E9PF82;Q13557-8;Q13557-12;Q13557-9;Q13557-10;Q13557-5;Q13557;Q13557-3;Q13557-6;Q13557-4;Q13557-11;H0Y9J2;H0Y6G2;H7BXS4;Q8WU40;Q5SWX3;A0A0A0MS52;A0A0A0MT11;Q13554-7;Q9UQM7;Q13554-4;Q9UQM7-2;Q13554-6;Q13555-10;Q13554-3;Q13554-8;Q13554-5;Q13555-3;Q13555-5;Q13555-4;Q13555-7;Q13555-9;Q13554-2;Q13555-2;Q13555-8;Q13555;Q13555-6;Q13554	H0Y9C2;D6R938;E9PBG7;E9PF82;Q13557-8;Q13557-12;Q13557-9;Q13557-10;Q13557-5;Q13557;Q13557-3;Q13557-6;Q13557-4;Q13557-11;H0Y9J2;H0Y6G2;H7BXS4;Q8WU40;Q5SWX3;A0A0A0MS52;A0A0A0MT11;Q13554-7;Q9UQM7;Q13554-4;Q9UQM7-2;Q13554-6;Q13555-10;Q13554-3;Q13554-8;Q13554-5;Q13555-3;Q13555-5;Q13555-4;Q13555-7;Q13555-9;Q13554-2;Q13555-2;Q13555-8;Q13555;Q13555-6;Q13554	2;2;2;2;2;2;2;2;2;2;2;2;2;2;1;1;1;1;1;1;1;1;1;1;1;1;1;1;1;1;1;1;1;1;1;1;1;1;1;1;1	2;2;2;2;2;2;2;2;2;2;2;2;2;2;1;1;1;1;1;1;1;1;1;1;1;1;1;1;1;1;1;1;1;1;1;1;1;1;1;1;1	2;2;2;2;2;2;2;2;2;2;2;2;2;2;1;1;1;1;1;1;1;1;1;1;1;1;1;1;1;1;1;1;1;1;1;1;1;1;1;1;1	Calcium/calmodulin-dependent protein kinase type II subunit delta;Calcium/calmodulin-dependent protein kinase type II subunit beta;Calcium/calmodulin-dependent protein kinase type II subunit alpha;Calcium/calmodulin-dependent protein kinase type II subunit gamma	CAMK2D;CAMK2G;CAMK2B;CAMK2A	Calcium/calmodulin-dependent protein kinase type II subunit delta (Fragment);Calcium/calmodulin-dependent protein kinase (CaM kinase) II delta, isoform CRA_e;Calcium/calmodulin-dependent protein kinase type II subunit delta;Calcium/calmodulin-dependent pro	41	2	2	2	1	1	2	0	0	0	1	1	2	0	0	0	1	1	2	0	0	0	22.7	22.7	22.7	22.126	194	194;498;512;533;478;478;489;492;498;499;510;513;519;524;182;335;362;453;516;539;558;449;478;479;489;492;495;503;517;518;524;527;529;533;542;542;547;556;558;588;666	0.00069493	5.6588	9.8	12.9	22.7	0	0	0	32931000	3639600	4087400	25204000	0	0
D6R9P3;D6RD18;D6RBZ0;Q99729-3;Q99729-2;Q99729-4;Q99729	D6R9P3;D6RD18;D6RBZ0;Q99729-3;Q99729-2;Q99729-4;Q99729	6;6;6;6;6;5;5	6;6;6;6;6;5;5	6;6;6;6;6;5;5	Heterogeneous nuclear ribonucleoprotein A/B	HNRNPAB	Heterogeneous nuclear ribonucleoprotein A/B;Heterogeneous nuclear ribonucleoprotein A/B;Heterogeneous nuclear ribonucleoprotein A/B;Isoform 3 of Heterogeneous nuclear ribonucleoprotein A/B;Isoform 2 of Heterogeneous nuclear ribonucleoprotein A/B;Isoform 4	7	6	6	6	6	4	5	5	5	5	6	4	5	5	5	5	6	4	5	5	5	5	26.4	26.4	26.4	30.302	280	280;283;327;285;332;286;332	0	45.839	26.4	14.6	19.6	21.4	21.4	21.4	260200000	42208000	18637000	33493000	56617000	46829000
D6R9P4;P46926;D6RAY7;D6RFF8;D6R917;D6RB13;P46926-2;Q8TDQ7-3;Q8TDQ7-2;Q8TDQ7;V9GYK3;Q8TDQ7-4;Q8TDQ7-5	D6R9P4;P46926;D6RAY7;D6RFF8;D6R917;D6RB13;P46926-2;Q8TDQ7-3;Q8TDQ7-2;Q8TDQ7	5;5;4;4;3;3;3;3;3;3;1;1;1	5;5;4;4;3;3;3;3;3;3;1;1;1	5;5;4;4;3;3;3;3;3;3;1;1;1	Glucosamine-6-phosphate isomerase;Glucosamine-6-phosphate isomerase 1;Glucosamine-6-phosphate isomerase 2	GNPDA1;GNPDA2	Glucosamine-6-phosphate isomerase;Glucosamine-6-phosphate isomerase 1;Glucosamine-6-phosphate isomerase (Fragment);Glucosamine-6-phosphate isomerase (Fragment);Glucosamine-6-phosphate isomerase 1 (Fragment);Glucosamine-6-phosphate isomerase (Fragment);Isof	13	5	5	5	2	1	3	0	0	0	2	1	3	0	0	0	2	1	3	0	0	0	29.6	29.6	29.6	30.9	274	274;289;237;290;138;160;212;259;275;276;117;206;242	0	12.238	15	4.4	14.6	0	0	0	17422000	2940800	5363800	9117000	0	0
D6RAX7;Q9BT78-2;Q9BT78;D6RD63;D6RFN0	D6RAX7;Q9BT78-2;Q9BT78;D6RD63;D6RFN0	4;4;4;3;3	4;4;4;3;3	4;4;4;3;3	COP9 signalosome complex subunit 4	COPS4	COP9 constitutive photomorphogenic-like protein subunit 4 isoform 2;Isoform 2 of COP9 signalosome complex subunit 4;COP9 signalosome complex subunit 4;COP9 signalosome complex subunit 4 (Fragment);COP9 signalosome complex subunit 4	5	4	4	4	2	2	2	2	4	3	2	2	2	2	4	3	2	2	2	2	4	3	14	14	14	47.726	420	420;352;406;275;438	0	9.5166	6.9	8.3	6.9	6.9	14	9.8	21893000	1815700	3878200	1846200	2937900	9437100
D6RBC6;D6REZ0;D6RB97;P52306-6;P52306-2;P52306-3;P52306-4;P52306;P52306-5	D6RBC6;D6REZ0;D6RB97;P52306-6;P52306-2;P52306-3;P52306-4;P52306;P52306-5	1;1;1;1;1;1;1;1;1	1;1;1;1;1;1;1;1;1	1;1;1;1;1;1;1;1;1	Rap1 GTPase-GDP dissociation stimulator 1	RAP1GDS1	Rap1 GTPase-GDP dissociation stimulator 1;Rap1 GTPase-GDP dissociation stimulator 1 (Fragment);Rap1 GTPase-GDP dissociation stimulator 1 (Fragment);Isoform 6 of Rap1 GTPase-GDP dissociation stimulator 1;Isoform 2 of Rap1 GTPase-GDP dissociation stimulator	9	1	1	1	1	1	1	0	0	0	1	1	1	0	0	0	1	1	1	0	0	0	17.8	17.8	17.8	12.668	118	118;158;158;516;558;559;607;607;608	0.003632	3.2508	17.8	17.8	17.8	0	0	0	8944000	3963800	2719600	2260600	0	0
H0YC83;D6RC52;D6RCB9;Q9NX24	H0YC83;D6RC52;D6RCB9;Q9NX24	1;1;1;1	1;1;1;1	1;1;1;1	H/ACA ribonucleoprotein complex subunit 2	NHP2	H/ACA ribonucleoprotein complex subunit 2 (Fragment);H/ACA ribonucleoprotein complex subunit 2 (Fragment);H/ACA ribonucleoprotein complex subunit 2 (Fragment);H/ACA ribonucleoprotein complex subunit 2	4	1	1	1	0	0	0	1	0	1	0	0	0	1	0	1	0	0	0	1	0	1	29.4	29.4	29.4	9.6201	85	85;132;135;153	0.00072993	6.7837	0	0	0	29.4	0	29.4	8973600	0	0	0	5225900	0
D6RD69;Q9Y6B6;D6R9R5;Q9H029;D6RDB2;X1WI22;D6RAA2	D6RD69;Q9Y6B6;D6R9R5;Q9H029;D6RDB2	6;6;4;4;3;2;2	6;6;4;4;3;2;2	4;4;4;4;1;0;0	GTP-binding protein SAR1b	SAR1B;DKFZp434B2017	GTP-binding protein SAR1b (Fragment);GTP-binding protein SAR1b;GTP-binding protein SAR1b (Fragment);GTP-binding protein SAR1b;GTP-binding protein SAR1b	7	6	6	4	4	1	5	4	4	5	4	1	5	4	4	5	2	0	3	2	2	3	50	50	38.8	19.047	170	170;198;118;130;144;50;103	0	13.676	24.7	4.7	38.2	30	31.8	38.2	145170000	33703000	4679600	33683000	18996000	23996000
D6RDI2;J3KPP4;O95232	D6RDI2;J3KPP4;O95232	1;1;1	1;1;1	1;1;1	Luc7-like protein 3	LUC7L3	Luc7-like protein 3 (Fragment);Cisplatin resistance-associated overexpressed protein, isoform CRA_b;Luc7-like protein 3	3	1	1	1	1	0	0	1	1	1	1	0	0	1	1	1	1	0	0	1	1	1	9.8	9.8	9.8	20.677	184	184;489;432	0.00068074	5.2839	9.8	0	0	9.8	9.8	9.8	4049800	871640	0	0	0	1309700
D6RDM7;P61086;P61086-3;P61086-2	D6RDM7;P61086;P61086-3	4;4;3;1	4;4;3;1	4;4;3;1	Ubiquitin-conjugating enzyme E2 K	UBE2K	Ubiquitin-conjugating enzyme E2 K (Fragment);Ubiquitin-conjugating enzyme E2 K;Isoform 3 of Ubiquitin-conjugating enzyme E2 K	4	4	4	4	1	2	1	2	2	2	1	2	1	2	2	2	1	2	1	2	2	2	39.8	39.8	39.8	14.035	123	123;200;157;149	0	9.4142	9.8	18.7	9.8	22	22	18.7	35034000	4250600	3071000	4483400	7932700	8308400
D6RGI3;D6RER5;Q9NVA2;Q9NVA2-2;D6RDU5;H0Y9G8;D6RDP1;D6R9Y6;H0Y961;B1AMS2;Q14141-3;Q14141-2;Q14141-4;Q14141	D6RGI3;D6RER5;Q9NVA2;Q9NVA2-2;D6RDU5	5;5;5;5;3;2;2;2;2;1;1;1;1;1	5;5;5;5;3;2;2;2;2;1;1;1;1;1	4;4;4;4;2;2;2;2;2;1;1;1;1;1	Septin-11	SEPT11	Septin 11, isoform CRA_b;Septin-11;Septin-11;Isoform 2 of Septin-11;Septin-11 (Fragment)	14	5	5	4	3	4	2	1	1	1	3	4	2	1	1	1	3	4	2	1	1	0	18.8	18.8	14.4	49.005	425	425;432;429;439;372;82;126;136;160;431;267;427;429;434	0	19.395	9.6	14.4	5.2	2.6	2.6	4.5	45733000	16514000	15630000	6553400	2715100	0
D6REX3;O94979-3;O94979-9;O94979-2;O94979;O94979-8;O94979-6;O94979-10;O94979-4;H7BXG7;O94979-7;D6RHZ5;H0YAB3;O94979-5;H0Y8V7;H0Y9K1;H0Y8W8;H0YAF5;H0Y9V3;H0Y9T9	D6REX3;O94979-3;O94979-9;O94979-2;O94979;O94979-8;O94979-6;O94979-10;O94979-4;H7BXG7;O94979-7;D6RHZ5	17;16;16;16;16;16;15;15;15;14;14;12;7;6;5;4;4;2;2;2	17;16;16;16;16;16;15;15;15;14;14;12;7;6;5;4;4;2;2;2	17;16;16;16;16;16;15;15;15;14;14;12;7;6;5;4;4;2;2;2	Protein transport protein Sec31A	SEC31A	Protein transport protein Sec31A;Isoform 3 of Protein transport protein Sec31A;Isoform 9 of Protein transport protein Sec31A;Isoform 2 of Protein transport protein Sec31A;Protein transport protein Sec31A;Isoform 8 of Protein transport protein Sec31A;Isofor	20	17	17	17	12	6	10	9	10	7	12	6	10	9	10	7	12	6	10	9	10	7	21.3	21.3	21.3	136.22	1251	1251;1106;1200;1205;1220;1233;1067;1166;1181;969;969;877;443;509;285;237;383;181;219;235	0	66.806	15.8	8.7	13.7	11	11.5	9.4	818410000	175960000	63294000	121380000	174810000	125050000
D6RGG3;Q99715-4;Q99715;A0A087X0A8;Q99715-2;H0Y991;H0Y4P7;H0Y5N9	D6RGG3;Q99715-4;Q99715;A0A087X0A8;Q99715-2	10;10;10;5;5;2;2;2	10;10;10;5;5;2;2;2	10;10;10;5;5;2;2;2	Collagen alpha-1(XII) chain	COL12A1	Collagen alpha-1(XII) chain;Isoform 4 of Collagen alpha-1(XII) chain;Collagen alpha-1(XII) chain;Collagen alpha-1(XII) chain;Isoform 2 of Collagen alpha-1(XII) chain	8	10	10	10	0	0	0	6	5	8	0	0	0	6	5	8	0	0	0	6	5	8	5.4	5.4	5.4	333.2	3062	3062;2987;3063;1874;1899;207;638;756	0	53.659	0	0	0	3.3	3.2	4	45820000	0	0	0	8562200	22714000
K7ENX8;K7ELV6;K7EJV5;K7ELT6;K7EJV1;K7EMY9;K7EPM4;K7ER40;K7EQR7;D6W5Y5;Q14011;Q14011-2	K7ENX8;K7ELV6;K7EJV5;K7ELT6;K7EJV1;K7EMY9;K7EPM4;K7ER40;K7EQR7;D6W5Y5;Q14011;Q14011-2	2;2;2;2;2;2;2;2;2;2;2;2	2;2;2;2;2;2;2;2;2;2;2;2	2;2;2;2;2;2;2;2;2;2;2;2	Cold-inducible RNA-binding protein	CIRBP	Cold-inducible RNA-binding protein (Fragment);Cold-inducible RNA-binding protein (Fragment);Cold-inducible RNA-binding protein (Fragment);Cold-inducible RNA-binding protein;Cold-inducible RNA-binding protein (Fragment);Cold-inducible RNA-binding protein;Co	12	2	2	2	2	0	2	2	2	2	2	0	2	2	2	2	2	0	2	2	2	2	31.2	31.2	31.2	8.9138	80	80;89;105;135;148;159;168;173;202;297;172;263	0	9.94	31.2	0	31.2	31.2	31.2	31.2	51552000	9701500	0	9063400	10747000	15905000
E2QRB3;P32322-2;P32322;P32322-3;J3QKT4;J3KQ22;J3QR88;J3QLK9;J3QL23;J3QL32;J3QL24;J3KTA8;J3QKT3;J3QRZ0	E2QRB3;P32322-2;P32322;P32322-3;J3QKT4;J3KQ22	5;5;5;5;3;3;2;2;2;2;2;1;1;1	5;5;5;5;3;3;2;2;2;2;2;1;1;1	4;4;4;4;2;3;2;2;2;2;2;1;1;1	Pyrroline-5-carboxylate reductase 1, mitochondrial;Pyrroline-5-carboxylate reductase	PYCR1	Pyrroline-5-carboxylate reductase 1, isoform CRA_c;Isoform 2 of Pyrroline-5-carboxylate reductase 1, mitochondrial;Pyrroline-5-carboxylate reductase 1, mitochondrial;Isoform 3 of Pyrroline-5-carboxylate reductase 1, mitochondrial;Pyrroline-5-carboxylate re	14	5	5	4	0	0	0	5	4	5	0	0	0	5	4	5	0	0	0	4	3	4	30.6	30.6	26	30.213	288	288;316;319;346;242;253;132;165;173;217;225;84;94;115	0	22.303	0	0	0	30.6	24.7	30.6	91977000	0	0	0	38708000	12039000
E5KLJ9;O60313-13;O60313;O60313-9;O60313-11;O60313-2;O60313-10;H7C141;H7C321	E5KLJ9;O60313-13;O60313;O60313-9;O60313-11;O60313-2;O60313-10	5;5;5;5;5;5;5;2;1	5;5;5;5;5;5;5;2;1	5;5;5;5;5;5;5;2;1	Dynamin-like 120 kDa protein, mitochondrial;Dynamin-like 120 kDa protein, form S1	OPA1	Dynamin-like 120 kDa protein, mitochondrial;Isoform 7 of Dynamin-like 120 kDa protein, mitochondrial;Dynamin-like 120 kDa protein, mitochondrial;Isoform 3 of Dynamin-like 120 kDa protein, mitochondrial;Isoform 5 of Dynamin-like 120 kDa protein, mitochondri	9	5	5	5	0	2	1	2	2	3	0	2	1	2	2	3	0	2	1	2	2	3	6.3	6.3	6.3	113.68	979	979;924;960;961;978;997;1015;183;185	0.00074738	7.3341	0	2.6	1	2.8	2.8	3.6	73390000	0	24042000	0	0	2267800
E5RGN3;E5RIM7;O00244	E5RGN3;E5RIM7;O00244	1;1;1	1;1;1	1;1;1	Copper transport protein ATOX1	ATOX1	Copper transport protein ATOX1;Copper transport protein ATOX1;Copper transport protein ATOX1	3	1	1	1	1	1	1	1	1	1	1	1	1	1	1	1	1	1	1	1	1	1	28.8	28.8	28.8	6.3304	59	59;73;68	0.00077519	8.1016	28.8	28.8	28.8	28.8	28.8	28.8	47848000	6026800	5366500	8132400	8744700	11095000
E5RGR0;O75608-2;O75608;A0A087X1K9;B4DP64;E5RJ48	E5RGR0;O75608-2;O75608;A0A087X1K9;B4DP64	4;4;4;3;2;1	4;4;4;3;2;1	4;4;4;3;2;1	Acyl-protein thioesterase 1	LYPLA1	Acyl-protein thioesterase 1 (Fragment);Isoform 2 of Acyl-protein thioesterase 1;Acyl-protein thioesterase 1;Acyl-protein thioesterase 1;Acyl-protein thioesterase 1	6	4	4	4	0	0	0	3	3	4	0	0	0	3	3	4	0	0	0	3	3	4	40.1	40.1	40.1	20.861	197	197;214;230;166;196;90	0	16.142	0	0	0	26.9	26.9	40.1	40138000	0	0	0	12484000	11901000
E5RGX5;Q93045;Q93045-2	E5RGX5;Q93045;Q93045-2	2;2;2	1;1;1	1;1;1	Stathmin;Stathmin-2	STMN2	Stathmin;Stathmin-2;Isoform 2 of Stathmin-2	3	2	1	1	2	2	2	2	2	2	1	1	1	1	1	1	1	1	1	1	1	1	11.3	6	6	19.574	168	168;179;187	0	14.132	11.3	11.3	11.3	11.3	11.3	11.3	72454000	11053000	10389000	4165900	16529000	14858000
E5RHG8;Q15369;R4GMY8;Q15369-2	E5RHG8;Q15369;R4GMY8;Q15369-2	4;4;3;3	4;4;3;3	4;4;3;3	Transcription elongation factor B polypeptide 1	TCEB1	Elongin-C (Fragment);Elongin-C;Elongin-C;Isoform 2 of Elongin-C	4	4	4	4	3	2	3	3	4	4	3	2	3	3	4	4	3	2	3	3	4	4	62.9	62.9	62.9	9.9601	89	89;112;65;96	0	85.668	51.7	38.2	51.7	51.7	62.9	62.9	122680000	11681000	3766800	20440000	24210000	36148000
E5RHT6;F8W1U7;F8VWH9;Q8N6T3-5;Q8N6T3-3;Q8N6T3;Q8N6T3-2;E5RHC5;Q8N6T3-4;E5RHH7	E5RHT6;F8W1U7;F8VWH9;Q8N6T3-5;Q8N6T3-3;Q8N6T3;Q8N6T3-2;E5RHC5;Q8N6T3-4	3;3;3;3;3;3;3;2;2;1	3;3;3;3;3;3;3;2;2;1	3;3;3;3;3;3;3;2;2;1	ADP-ribosylation factor GTPase-activating protein 1	ARFGAP1	ADP-ribosylation factor GTPase-activating protein 1 (Fragment);ADP-ribosylation factor GTPase-activating protein 1 (Fragment);ADP-ribosylation factor GTPase-activating protein 1;Isoform 5 of ADP-ribosylation factor GTPase-activating protein 1;Isoform 3 of	10	3	3	3	1	0	1	3	2	1	1	0	1	3	2	1	1	0	1	3	2	1	19.3	19.3	19.3	26.555	244	244;271;340;361;403;406;414;261;293;153	0	9.4528	5.7	0	6.1	19.3	13.1	5.7	9081200	0	0	2171500	4257800	2651900
E5RHW4;O94905;E5RJ09;O94905-2;O94905-3	E5RHW4;O94905;E5RJ09	5;5;3;1;1	3;3;3;0;0	3;3;3;0;0	Erlin-2	ERLIN2	Erlin-2 (Fragment);Erlin-2;Erlin-2 (Fragment)	5	5	3	3	4	2	4	1	2	1	3	1	2	0	0	0	3	1	2	0	0	0	19.2	12.1	12.1	37.725	338	338;339;197;152;206	0.00070671	5.9778	15.7	7.1	13.3	3.6	7.1	3.6	9203400	2634900	1392900	5175600	0	0
E5RI99;P62888;A0A0B4J213;E5RJH3;A0A0C4DH44	E5RI99;P62888	5;5;2;2;2	5;5;2;2;2	5;5;2;2;2	60S ribosomal protein L30	RPL30	60S ribosomal protein L30 (Fragment);60S ribosomal protein L30	5	5	5	5	4	4	4	4	5	4	4	4	4	4	5	4	4	4	4	4	5	4	58.8	58.8	58.8	12.656	114	114;115;51;56;96	0	91.967	51.8	51.8	51.8	51.8	58.8	51.8	385030000	60818000	33083000	60408000	75777000	81541000
E5RIW3;E5RJD8;O75347;E5RHG6;O75347-2;E5RIX8	E5RIW3;E5RJD8;O75347;E5RHG6;O75347-2	9;9;9;8;6;3	9;9;9;8;6;3	9;9;9;8;6;3	Tubulin-specific chaperone A	TBCA	Tubulin-specific chaperone A;Tubulin-specific chaperone A;Tubulin-specific chaperone A;Tubulin-specific chaperone A;Isoform 2 of Tubulin-specific chaperone A	6	9	9	9	8	7	9	8	7	9	8	7	9	8	7	9	8	7	9	8	7	9	76.2	76.2	76.2	10.08	84	84;119;108;131;129;79	0	36.212	76.2	75	76.2	72.6	67.9	76.2	347050000	57922000	34457000	72552000	62980000	66545000
E5RJR5;P63208;E7ERH2;F8W8N3;P63208-2;E5RGM3;E5RI56	E5RJR5;P63208;E7ERH2;F8W8N3;P63208-2;E5RGM3	5;5;4;4;4;3;1	5;5;4;4;4;3;1	5;5;4;4;4;3;1	S-phase kinase-associated protein 1	SKP1	S-phase kinase-associated protein 1;S-phase kinase-associated protein 1;S-phase kinase-associated protein 1 (Fragment);S-phase kinase-associated protein 1 (Fragment);Isoform 2 of S-phase kinase-associated protein 1;S-phase kinase-associated protein 1 (Frag	7	5	5	5	3	2	3	3	2	4	3	2	3	3	2	4	3	2	3	3	2	4	52.1	52.1	52.1	18.72	163	163;163;142;158;160;102;91	0	15.347	33.1	16	30.1	33.1	16	38	108390000	10570000	11694000	18263000	31434000	13315000
E5RK69;H0YC77	E5RK69	23;2	2;0	2;0	Annexin	ANXA6	Annexin	2	23	2	2	14	15	14	17	20	19	0	0	0	1	2	1	0	0	0	1	2	1	60.7	6.3	6.3	51.776	460	460;91	0	8.634	41.1	44.8	40.9	42	55	51.7	24160000	0	0	0	8124100	8590000
E7EMD0;H0Y4R2;P16435	E7EMD0;H0Y4R2;P16435	1;1;1	1;1;1	1;1;1	NADPH--cytochrome P450 reductase	POR	NADPH--cytochrome P450 reductase;NADPH--cytochrome P450 reductase (Fragment);NADPH--cytochrome P450 reductase	3	1	1	1	0	0	1	0	0	1	0	0	1	0	0	1	0	0	1	0	0	1	5	5	5	47.401	418	418;725;677	0.00070922	6.0541	0	0	5	0	0	5	7563800	0	0	3871100	0	0
E7EUI7;E7EMN6;G1AUC5;Q6NXS1;P41236	E7EUI7;E7EMN6;G1AUC5;Q6NXS1;P41236	2;2;2;2;2	2;2;2;2;2	2;2;2;2;2	Protein phosphatase inhibitor 2-like protein 3;Protein phosphatase inhibitor 2	PPP1R2;PPP1R2P3	Protein phosphatase inhibitor 2;Protein phosphatase inhibitor 2 (Fragment);Protein phosphatase inhibitor 2-like protein;Protein phosphatase inhibitor 2-like protein 3;Protein phosphatase inhibitor 2	5	2	2	2	0	0	1	1	0	0	0	0	1	1	0	0	0	0	1	1	0	0	32.5	32.5	32.5	8.9811	80	80;170;205;205;205	0.0047393	2.9576	0	0	13.8	18.8	0	0	4424400	0	0	3296900	1127500	0
J3KMY5;H0YIZ1;G3V3E8;E7EMS2;G3V3D1;P61916;G3V2V8;P61916-2	J3KMY5;H0YIZ1;G3V3E8;E7EMS2;G3V3D1;P61916;G3V2V8;P61916-2	4;4;4;4;4;4;3;3	4;4;4;4;4;4;3;3	4;4;4;4;4;4;3;3	Epididymal secretory protein E1	NPC2	Epididymal secretory protein E1;Epididymal secretory protein E1 (Fragment);Epididymal secretory protein E1;Epididymal secretory protein E1;Epididymal secretory protein E1 (Fragment);Epididymal secretory protein E1;Epididymal secretory protein E1 (Fragment)	8	4	4	4	3	3	4	1	1	1	3	3	4	1	1	1	3	3	4	1	1	1	37.2	37.2	37.2	16.23	148	148;173;174;201;221;151;122;125	0	22.197	32.4	32.4	37.2	15.5	15.5	15.5	132580000	33995000	16205000	58627000	6522100	7733900
E7ENJ6;Q9BXS5;Q9BXS5-2;K7EJL1;K7EK69;K7ERH5;A0A087WZX7;K7EL08;K7ENA7;Q9Y6Q5;Q9Y6Q5-2	E7ENJ6;Q9BXS5;Q9BXS5-2;K7EJL1	3;3;3;2;1;1;1;1;1;1;1	3;3;3;2;1;1;1;1;1;1;1	3;3;3;2;1;1;1;1;1;1;1	AP-1 complex subunit mu-1	AP1M1	AP-1 complex subunit mu-1;AP-1 complex subunit mu-1;Isoform 2 of AP-1 complex subunit mu-1;AP-1 complex subunit mu-1	11	3	3	3	0	0	0	0	1	2	0	0	0	0	1	2	0	0	0	0	1	2	12.7	12.7	12.7	42.636	370	370;423;435;351;44;103;128;128;136;423;425	0.00063857	4.1219	0	0	0	0	2.7	10	6890300	0	0	0	0	0
E7EPB3;P50914	E7EPB3;P50914	4;4	4;4	4;4	60S ribosomal protein L14	RPL14	60S ribosomal protein L14;60S ribosomal protein L14	2	4	4	4	4	4	4	4	4	4	4	4	4	4	4	4	4	4	4	4	4	4	36.3	36.3	36.3	14.558	124	124;215	0	22.164	36.3	36.3	36.3	36.3	36.3	36.3	401420000	50074000	42565000	87119000	85181000	62543000
E7ES33;E7EPK1;Q16181-2;Q16181;G3V1Q4;A0A0U1RRM2;A0A0U1RQK0;A0A0U1RRD1;Q5JXL7;Q6ZU15	E7ES33;E7EPK1;Q16181-2;Q16181;G3V1Q4	11;11;11;11;10;2;1;1;1;1	11;11;11;11;10;2;1;1;1;1	6;6;6;6;5;2;1;1;1;0	Septin-7	SEPT7	Septin-7;Septin-7;Isoform 2 of Septin-7;Septin-7;Septin-7	10	11	11	6	8	5	7	9	10	9	8	5	7	9	10	9	5	3	3	4	5	5	36.9	36.9	18	48.715	417	417;437;436;437;401;111;76;77;88;432	0	70.432	25.7	18.2	24	29.5	34.5	26.1	328980000	37722000	14338000	55373000	82179000	68184000
E7EQR4;P15311	E7EQR4;P15311	18;18	10;10	10;10	Ezrin	EZR	Ezrin;Ezrin	2	18	10	10	14	14	14	12	11	14	6	6	8	4	3	6	6	6	8	4	3	6	36	23.7	23.7	69.371	586	586;586	0	31.671	28.5	25.4	25.1	22	19.8	27	109340000	21311000	15828000	31573000	13420000	10475000
S4R3H4;E7EQT4;Q9UKV3-5;Q9UKV3;G3V3B0;Q9UKV3-3;Q9UKV3-2;A0A087WYN3;G3V3T3	S4R3H4;E7EQT4;Q9UKV3-5;Q9UKV3;G3V3B0;Q9UKV3-3;Q9UKV3-2	3;3;3;3;2;2;2;1;1	3;3;3;3;2;2;2;1;1	3;3;3;3;2;2;2;1;1	Apoptotic chromatin condensation inducer in the nucleus	ACIN1	Apoptotic chromatin condensation inducer in the nucleus;Apoptotic chromatin condensation inducer in the nucleus;Isoform 4 of Apoptotic chromatin condensation inducer in the nucleus;Apoptotic chromatin condensation inducer in the nucleus;Apoptotic chromatin	9	3	3	3	1	0	1	1	0	1	1	0	1	1	0	1	1	0	1	1	0	1	4.9	4.9	4.9	145.44	1283	1283;1301;1328;1341;582;583;614;82;194	0.00073475	6.9714	2.3	0	1.3	1.2	0	1.3	13390000	2638500	0	8490200	0	0
E7EQV9;P61313;E7ENU7;E7EX53;P61313-2;E7ERA2	E7EQV9;P61313;E7ENU7;E7EX53	7;7;6;4;3;1	7;7;6;4;3;1	7;7;6;4;3;1	Ribosomal protein L15;60S ribosomal protein L15	RPL15	Ribosomal protein L15 (Fragment);60S ribosomal protein L15;Ribosomal protein L15 (Fragment);Ribosomal protein L15 (Fragment)	6	7	7	7	6	6	7	6	5	6	6	6	7	6	5	6	6	6	7	6	5	6	39.1	39.1	39.1	20.51	174	174;204;175;133;145;59	0	27.061	39.1	38.5	39.1	35.1	34.5	38.5	505160000	145610000	49953000	94699000	67340000	52767000
E7ERJ7;P11940;P11940-2;A0A087WTT1;E7EQV3;H0YAR2;Q9H361;H0YBN4;E5RH24;E5RJB9;H0YAP2;H0YB86;H0Y5F5;Q4VXU2;E5RHG7;E5RGH3;H0YAS6;H0YB75;E5RGC4;E5RFD8;H0YEQ8;H0YAS7;H0YEU6;Q4VXU2-2;E5RJM8;H0YER0;H0Y6X6;H0YCC8;Q5JQF8	E7ERJ7;P11940;P11940-2;A0A087WTT1;E7EQV3;H0YAR2	16;16;15;14;14;9;7;5;4;4;4;4;4;4;3;3;3;3;2;2;2;2;2;2;1;1;1;1;1	16;16;15;14;14;9;7;5;4;4;4;4;4;4;3;3;3;3;2;2;2;2;2;2;1;1;1;1;1	10;10;9;8;8;6;5;2;2;2;4;2;0;2;2;1;2;2;2;2;0;1;0;2;1;0;0;0;1	Polyadenylate-binding protein;Polyadenylate-binding protein 1	PABPC1	Polyadenylate-binding protein;Polyadenylate-binding protein 1;Isoform 2 of Polyadenylate-binding protein 1;Polyadenylate-binding protein;Polyadenylate-binding protein;Polyadenylate-binding protein 1 (Fragment)	29	16	16	10	12	11	9	13	13	14	12	11	9	13	13	14	8	7	6	9	9	8	40.2	40.2	27.6	67.138	604	604;636;547;522;591;284;631;174;118;129;131;165;550;614;75;108;169;183;43;61;112;136;249;330;38;68;195;197;200	0	144.25	26.3	21.4	21	33.3	28	32	486600000	68051000	43431000	100460000	78836000	72992000
E7ESP4;E7EMF1;E9PB77	E7ESP4;E7EMF1;E9PB77	16;15;10	1;1;1	1;1;1		ITGA2	Integrin alpha-2;Integrin alpha-2;Integrin alpha-2	3	16	1	1	10	11	12	6	5	8	0	1	0	1	0	0	0	1	0	1	0	0	24.9	2.1	2.1	102.83	942	942;815;641	0	8.9733	13.5	16.5	16.9	10	7.9	13.8	6963100	0	0	0	6963100	0
E7ETB3;Q9ULA0;E7EMB6;F8WAN0;B9ZVU2;C9JBE1;C9J1E2;E7EPX3;E5RJ35;C9JRG3	E7ETB3;Q9ULA0;E7EMB6;F8WAN0;B9ZVU2;C9JBE1	6;6;5;4;3;3;2;2;1;1	6;6;5;4;3;3;2;2;1;1	6;6;5;4;3;3;2;2;1;1	Aspartyl aminopeptidase	DNPEP	Aspartyl aminopeptidase;Aspartyl aminopeptidase;Aspartyl aminopeptidase;Aspartyl aminopeptidase (Fragment);Aspartyl aminopeptidase (Fragment);Aspartyl aminopeptidase (Fragment)	10	6	6	6	2	0	2	2	3	5	2	0	2	2	3	5	2	0	2	2	3	5	19.1	19.1	19.1	54.502	493	493;475;410;273;270;331;137;224;89;117	0	17.008	4.5	0	7.7	7.7	10.5	16.6	48798000	1167400	0	10139000	10839000	11424000
E7ETU5;F6Y5H0;P29558-2;P29558	E7ETU5;F6Y5H0;P29558-2;P29558	1;1;1;1	1;1;1;1	1;1;1;1	RNA-binding motif, single-stranded-interacting protein 1	RBMS1	RNA-binding motif, single-stranded-interacting protein 1;RNA-binding motif, single-stranded-interacting protein 1;Isoform 2 of RNA-binding motif, single-stranded-interacting protein 1;RNA-binding motif, single-stranded-interacting protein 1	4	1	1	1	1	0	1	1	1	1	1	0	1	1	1	1	1	0	1	1	1	1	4.1	4.1	4.1	40.147	370	370;386;403;406	0.00063331	4.0061	4.1	0	4.1	4.1	4.1	4.1	1020100	0	0	0	1020100	0
E9PF06;H0Y9G6;E7ETU7;P09001	E9PF06;H0Y9G6;E7ETU7;P09001	1;1;1;1	1;1;1;1	1;1;1;1	39S ribosomal protein L3, mitochondrial	MRPL3	39S ribosomal protein L3, mitochondrial (Fragment);39S ribosomal protein L3, mitochondrial (Fragment);39S ribosomal protein L3, mitochondrial;39S ribosomal protein L3, mitochondrial	4	1	1	1	0	0	0	1	0	1	0	0	0	1	0	1	0	0	0	1	0	1	11.4	11.4	11.4	19.58	176	176;363;375;348	0.0041916	3.0943	0	0	0	11.4	0	11.4	7570900	0	0	0	2589500	0
E7ETY7;Q8TED1	E7ETY7;Q8TED1	3;3	3;3	3;3	Glutathione peroxidase;Probable glutathione peroxidase 8	GPX8	Glutathione peroxidase;Probable glutathione peroxidase 8	2	3	3	3	1	0	1	0	0	1	1	0	1	0	0	1	1	0	1	0	0	1	26.6	26.6	26.6	18.09	158	158;209	0.00076687	7.9001	7	0	12.7	0	0	7	6103800	2640200	0	2590700	0	0
E7EU96;Q8NEV1;P68400;P68400-2;V9GYA2;V9GY80;A0A087WY74	E7EU96;Q8NEV1;P68400;P68400-2	5;5;5;3;2;2;1	5;5;5;3;2;2;1	5;5;5;3;2;2;1	Casein kinase II subunit alpha 3;Casein kinase II subunit alpha	CSNK2A1;CSNK2A3	Casein kinase II subunit alpha;Casein kinase II subunit alpha 3;Casein kinase II subunit alpha;Isoform 2 of Casein kinase II subunit alpha	7	5	5	5	2	1	2	3	4	4	2	1	2	3	4	4	2	1	2	3	4	4	22.3	22.3	22.3	45.31	385	385;391;391;255;74;79;118	0	29.795	7.8	4.9	7.8	13	17.1	17.1	83023000	6885600	0	2012200	20228000	21989000
E7EX73;E9PGM1;E7EUU4;Q04637-5;Q04637-4;Q04637-3;Q04637;Q04637-8;Q04637-9;Q04637-6;Q04637-7;C9JF13;C9J6B6;C9J2Z7;C9K073;H7C044;H7C0V6;A0A0A0MSA7;A0A0U1RQK7;O43432-4;O43432;O43432-3;F8WCF2;C9JHW9	E7EX73;E9PGM1;E7EUU4;Q04637-5;Q04637-4;Q04637-3;Q04637;Q04637-8;Q04637-9;Q04637-6;Q04637-7;C9JF13	24;24;24;24;24;24;24;24;24;23;23;12;11;9;9;4;3;2;2;2;2;2;1;1	24;24;24;24;24;24;24;24;24;23;23;12;11;9;9;4;3;2;2;2;2;2;1;1	24;24;24;24;24;24;24;24;24;23;23;12;11;9;9;4;3;2;2;2;2;2;1;1	Eukaryotic translation initiation factor 4 gamma 1	EIF4G1	Eukaryotic translation initiation factor 4 gamma 1;Eukaryotic translation initiation factor 4 gamma 1;Eukaryotic translation initiation factor 4 gamma 1;Isoform D of Eukaryotic translation initiation factor 4 gamma 1;Isoform C of Eukaryotic translation ini	24	24	24	24	15	10	19	15	15	18	15	10	19	15	15	18	15	10	19	15	15	18	24.9	24.9	24.9	158.64	1436	1436;1513;1560;1435;1512;1559;1599;1600;1606;1403;1404;903;757;833;869;226;180;1621;1774;1305;1585;1591;50;160	0	126.62	14.1	11	18.9	13.9	14.7	17.5	436600000	98808000	35164000	84721000	86069000	59004000
E7EVA0;P27816-6;P27816;P27816-2;P27816-5;H7C456;P27816-4;H7C4C5;B5MEG9;H0Y2V1;F8W9U4;A0A0J9YVV8;A0A0J9YW37;P27816-7	E7EVA0;P27816-6;P27816;P27816-2;P27816-5	29;28;28;23;15;7;7;6;6;5;5;3;3;3	29;28;28;23;15;7;7;6;6;5;5;3;3;3	29;28;28;23;15;7;7;6;6;5;5;3;3;3	Microtubule-associated protein;Microtubule-associated protein 4	MAP4	Microtubule-associated protein;Isoform 6 of Microtubule-associated protein 4;Microtubule-associated protein 4;Isoform 2 of Microtubule-associated protein 4;Isoform 5 of Microtubule-associated protein 4	14	29	29	29	22	21	21	21	20	19	22	21	21	21	20	19	22	21	21	21	20	19	20.6	20.6	20.6	245.44	2297	2297;1135;1152;979;809;283;872;493;760;463;828;76;140;99	0	211.04	16.2	15.9	16.4	15.4	14	13.6	868910000	172760000	96846000	199800000	147820000	125910000
K7ERH7;M0R021;M0QZ28;E9PEY4;E7EVB6;Q9Y4J8-8;Q9Y4J8-12;Q9Y4J8-6;Q9Y4J8-10;Q9Y4J8-11;Q9Y4J8-16;Q9Y4J8-5;O60941-6;O60941-3;O60941-5;Q9Y4J8-4;O60941-2;Q9Y4J8-3;O60941-4;O60941-7;O60941;Q9Y4J8-13;Q9Y4J8-2;Q9Y4J8-14;Q9Y4J8-15;Q9Y4J8	K7ERH7;M0R021;M0QZ28;E9PEY4;E7EVB6;Q9Y4J8-8;Q9Y4J8-12;Q9Y4J8-6;Q9Y4J8-10;Q9Y4J8-11;Q9Y4J8-16;Q9Y4J8-5;O60941-6;O60941-3;O60941-5;Q9Y4J8-4;O60941-2;Q9Y4J8-3;O60941-4;O60941-7;O60941;Q9Y4J8-13;Q9Y4J8-2;Q9Y4J8-14;Q9Y4J8-15;Q9Y4J8	1;1;1;1;1;1;1;1;1;1;1;1;1;1;1;1;1;1;1;1;1;1;1;1;1;1	1;1;1;1;1;1;1;1;1;1;1;1;1;1;1;1;1;1;1;1;1;1;1;1;1;1	1;1;1;1;1;1;1;1;1;1;1;1;1;1;1;1;1;1;1;1;1;1;1;1;1;1	Dystrobrevin;Dystrobrevin alpha;Dystrobrevin beta	DTNA;DTNB	Dystrobrevin alpha (Fragment);Dystrobrevin alpha;Dystrobrevin alpha;Dystrobrevin;Dystrobrevin;Isoform 8 of Dystrobrevin alpha;Isoform 12 of Dystrobrevin alpha;Isoform 6 of Dystrobrevin alpha;Isoform 10 of Dystrobrevin alpha;Isoform 11 of Dystrobrevin alpha	26	1	1	1	0	0	1	0	0	0	0	0	1	0	0	0	0	0	1	0	0	0	11.9	11.9	11.9	12.413	109	109;162;365;590;620;192;320;391;395;452;510;513;545;558;560;567;567;570;597;609;627;683;686;690;724;743	0.0095238	2.3968	0	0	11.9	0	0	0	1173400	0	0	1173400	0	0
G3V2E7;F8W6L3;G3V3H3;G3V5R9;E7EVH7;Q07866-8;Q07866-2;Q07866-3;Q07866;Q07866-7;Q07866-5;Q07866-10;Q07866-6;Q07866-4;Q07866-9;G5E9S8;A8MZ87;Q9H0B6-2;Q9H0B6;H0YJU9;H0YJL0;H0YJT3;H0YG16;E9PQ02;A8MX29	G3V2E7;F8W6L3;G3V3H3;G3V5R9;E7EVH7;Q07866-8;Q07866-2;Q07866-3;Q07866;Q07866-7;Q07866-5;Q07866-10;Q07866-6;Q07866-4;Q07866-9;G5E9S8;A8MZ87;Q9H0B6-2;Q9H0B6	5;5;5;5;5;5;5;5;5;5;5;5;5;5;5;4;3;3;3;2;2;2;2;1;1	5;5;5;5;5;5;5;5;5;5;5;5;5;5;5;4;3;3;3;2;2;2;2;1;1	5;5;5;5;5;5;5;5;5;5;5;5;5;5;5;4;3;3;3;2;2;2;2;1;1	Kinesin light chain 1;Kinesin light chain 2	KLC1;KLC2	Kinesin light chain 1;Kinesin light chain 1;Kinesin light chain 1;Kinesin light chain 1;Uncharacterized protein;Isoform S of Kinesin light chain 1;Isoform C of Kinesin light chain 1;Isoform G of Kinesin light chain 1;Kinesin light chain 1;Isoform P of Kine	25	5	5	5	5	2	3	1	0	1	5	2	3	1	0	1	5	2	3	1	0	1	13.2	13.2	13.2	62.715	551	551;576;609;630;732;551;560;564;573;584;616;618;628;637;639;549;521;545;622;131;150;161;268;189;333	0	21.055	13.2	5.1	8.9	3.3	0	2.4	35008000	16470000	4437900	12680000	0	0
E7EW33;H7C229;E7EVJ5;Q96F07-2;Q96F07;Q7L576;Q7L576-3;Q7L576-2;H0YL50;A0A0G2JR96;A0A0G2JQT1	E7EW33;H7C229;E7EVJ5;Q96F07-2;Q96F07;Q7L576;Q7L576-3;Q7L576-2	4;4;4;4;4;3;2;2;1;1;1	4;4;4;4;4;3;2;2;1;1;1	4;4;4;4;4;3;2;2;1;1;1	Cytoplasmic FMR1-interacting protein 2;Cytoplasmic FMR1-interacting protein 1	CYFIP2;CYFIP1	Cytoplasmic FMR1-interacting protein 2;Cytoplasmic FMR1-interacting protein 2;Cytoplasmic FMR1-interacting protein 2;Isoform 2 of Cytoplasmic FMR1-interacting protein 2;Cytoplasmic FMR1-interacting protein 2;Cytoplasmic FMR1-interacting protein 1;Isoform 3	11	4	4	4	2	2	2	4	2	1	2	2	2	4	2	1	2	2	2	4	2	1	4.7	4.7	4.7	122.46	1057	1057;1117;1227;1253;1278;1253;447;822;176;862;862	0.00072939	6.7831	2.5	2.5	2.5	4.7	2.7	1.1	150130000	36805000	16618000	45010000	46451000	2193700
E7EX17;P23588-2;P23588;F8W0K0;F8VSC7;F8VP89;F8VRU1;F8VYE9;F8VX11	E7EX17;P23588-2;P23588;F8W0K0;F8VSC7;F8VP89	4;4;4;2;2;2;1;1;1	4;4;4;2;2;2;1;1;1	4;4;4;2;2;2;1;1;1	Eukaryotic translation initiation factor 4B	EIF4B	Eukaryotic translation initiation factor 4B;Isoform 2 of Eukaryotic translation initiation factor 4B;Eukaryotic translation initiation factor 4B;Eukaryotic translation initiation factor 4B (Fragment);Eukaryotic translation initiation factor 4B;Eukaryotic t	9	4	4	4	2	2	3	3	2	2	2	2	3	3	2	2	2	2	3	3	2	2	9.3	9.3	9.3	69.697	616	616;572;611;169;227;275;175;185;360	0	11.961	4.5	4.5	8	5.8	4.5	4.5	109880000	16724000	14011000	22135000	20266000	16417000
E7EX90;Q14203-5;Q14203-3;Q14203-4;Q14203-2;Q14203-6;Q14203;Q6AWB1;E7EWF7	E7EX90;Q14203-5;Q14203-3;Q14203-4;Q14203-2;Q14203-6;Q14203	10;10;10;10;9;9;9;4;3	10;10;10;10;9;9;9;4;3	10;10;10;10;9;9;9;4;3	Dynactin subunit 1	DCTN1	Dynactin subunit 1;Isoform 5 of Dynactin subunit 1;Isoform 3 of Dynactin subunit 1;Isoform 4 of Dynactin subunit 1;Isoform p135 of Dynactin subunit 1;Isoform 6 of Dynactin subunit 1;Dynactin subunit 1	9	10	10	10	3	1	5	4	2	2	3	1	5	4	2	2	3	1	5	4	2	2	14.3	14.3	14.3	139.09	1256	1256;1139;1236;1253;1144;1271;1278;890;191	0	20.005	4.8	2	8.7	5.1	3.4	2.2	54566000	10314000	4109000	22763000	5585000	6602000
F8VZJ2;H0YHX9;Q13765;E9PAV3-2;E9PAV3;F8W1N5;F8VNW4;F8W0W4;F8VZ58;Q9BZK3	F8VZJ2;H0YHX9;Q13765;E9PAV3-2;E9PAV3;F8W1N5;F8VNW4;F8W0W4	4;4;4;4;4;3;3;3;1;1	4;4;4;4;4;3;3;3;1;1	4;4;4;4;4;3;3;3;1;1	Nascent polypeptide-associated complex subunit alpha;Nascent polypeptide-associated complex subunit alpha, muscle-specific form	NACA	Nascent polypeptide-associated complex subunit alpha;Nascent polypeptide-associated complex subunit alpha (Fragment);Nascent polypeptide-associated complex subunit alpha;Isoform 2 of Nascent polypeptide-associated complex subunit alpha, muscle-specific for	10	4	4	4	4	4	4	3	4	4	4	4	4	3	4	4	4	4	4	3	4	4	41.9	41.9	41.9	15.016	136	136;213;215;925;2078;71;148;198;126;213	0	87.703	41.9	41.9	41.9	30.9	41.9	41.9	178870000	26434000	12946000	36606000	21741000	38791000
E9PB51;Q9BQ04;Q9BWF3;E9PLB0;E9PM61;D6R9K7;U3KQD5;J3QRR5;Q9BWF3-3;Q9BWF3-4;Q9BWF3-2	E9PB51;Q9BQ04;Q9BWF3;E9PLB0;E9PM61;D6R9K7;U3KQD5;J3QRR5;Q9BWF3-3;Q9BWF3-4;Q9BWF3-2	3;3;3;2;2;2;2;2;2;2;2	3;3;3;2;2;2;2;2;2;2;2	2;2;2;2;2;2;2;2;2;2;2	RNA-binding protein 4B;RNA-binding protein 4	RBM4;RBM4B	RNA-binding protein 4 (Fragment);RNA-binding protein 4B;RNA-binding protein 4;RNA-binding protein 4B;RNA-binding protein 4B;RNA-binding protein 4;RNA-binding protein 4B;RNA-binding protein 4;Isoform 3 of RNA-binding protein 4;Isoform 4 of RNA-binding prote	11	3	3	2	0	0	0	1	0	2	0	0	0	1	0	2	0	0	0	1	0	1	12.1	12.1	6.7	26.286	240	240;359;364;143;147;150;151;155;143;173;177	0.00064558	4.2687	0	0	0	3.3	0	8.8	1270000	0	0	0	0	0
E9PB61;Q86V81	E9PB61;Q86V81	7;7	7;7	7;7	THO complex subunit 4	ALYREF	THO complex subunit 4;THO complex subunit 4	2	7	7	7	6	5	6	5	6	7	6	5	6	5	6	7	6	5	6	5	6	7	40.2	40.2	40.2	27.557	264	264;257	0	52.423	38.3	31.4	36	28.4	38.3	40.2	217380000	31792000	25350000	47376000	34133000	37184000
E9PB90;P52789;P52790	E9PB90;P52789	16;16;3	12;12;1	12;12;1	Hexokinase;Hexokinase-2	HK2	Hexokinase-2;Hexokinase-2	3	16	12	12	14	14	14	2	2	0	10	11	10	0	0	0	10	11	10	0	0	0	22.3	18	18	98.972	889	889;917;923	0	40.205	19.2	20.7	18.9	2.1	2.1	0	126730000	41081000	34531000	51115000	0	0
E9PG39;E9PC15;Q53H12	E9PG39;E9PC15;Q53H12	1;1;1	1;1;1	1;1;1	Acylglycerol kinase, mitochondrial	AGK	Acylglycerol kinase, mitochondrial;Acylglycerol kinase, mitochondrial;Acylglycerol kinase, mitochondrial	3	1	1	1	0	1	1	1	1	1	0	1	1	1	1	1	0	1	1	1	1	1	10.2	10.2	10.2	26.925	244	244;394;422	0.00073638	6.9903	0	10.2	10.2	10.2	10.2	10.2	27893000	0	4072900	7721700	6362500	5789500
E9PCY5;Q02880-2;Q02880	E9PCY5;Q02880-2;Q02880	2;2;2	2;2;2	1;1;1	DNA topoisomerase 2;DNA topoisomerase 2-beta	TOP2B	DNA topoisomerase 2 (Fragment);Isoform Beta-1 of DNA topoisomerase 2-beta;DNA topoisomerase 2-beta	3	2	2	1	1	0	1	0	1	0	1	0	1	0	1	0	0	0	0	0	1	0	1.9	1.9	0.8	130.48	1150	1150;1621;1626	0.00064893	4.3393	1.1	0	1.1	0	0.8	0	1466100	1466100	0	0	0	0
E9PD68;Q14194;Q14194-2	E9PD68;Q14194;Q14194-2	5;5;5	2;2;2	2;2;2	Dihydropyrimidinase-related protein 1	CRMP1	Dihydropyrimidinase-related protein 1;Dihydropyrimidinase-related protein 1;Isoform LCRMP-1 of Dihydropyrimidinase-related protein 1	3	5	2	2	3	3	3	4	5	4	0	0	0	1	2	1	0	0	0	1	2	1	11.2	4.7	4.7	62.029	570	570;572;686	0.0012369	3.6823	6.5	6.5	6.5	8.6	11.2	9.1	0	0	0	0	0	0
E9PDI2;P40123;B7Z385;A0A087X0J3;A0A087WZ15;P40123-2;P40123-3;F8WDB9;F8WEW0	E9PDI2;P40123;B7Z385;A0A087X0J3;A0A087WZ15;P40123-2;P40123-3	8;8;7;7;7;7;4;2;1	8;8;7;7;7;7;4;2;1	8;8;7;7;7;7;4;2;1	Adenylyl cyclase-associated protein;Adenylyl cyclase-associated protein 2	CAP2	Adenylyl cyclase-associated protein;Adenylyl cyclase-associated protein 2;Adenylyl cyclase-associated protein;Adenylyl cyclase-associated protein;Adenylyl cyclase-associated protein;Isoform 2 of Adenylyl cyclase-associated protein 2;Isoform 3 of Adenylyl c	9	8	8	8	0	0	0	6	8	6	0	0	0	6	8	6	0	0	0	6	8	6	24.4	24.4	24.4	49.822	451	451;477;365;394;394;413;217;194;104	0	28.178	0	0	0	19.7	24.4	18	81625000	0	0	0	34022000	31767000
E9PDM8;O94855;O94855-2;E9PC44	E9PDM8;O94855;O94855-2;E9PC44	6;6;6;5	6;6;6;5	6;6;6;5	Protein transport protein Sec24D	SEC24D	Protein transport protein Sec24D;Protein transport protein Sec24D;Isoform 2 of Protein transport protein Sec24D;Protein transport protein Sec24D	4	6	6	6	2	2	3	1	3	5	2	2	3	1	3	5	2	2	3	1	3	5	13	13	13	74.953	663	663;1032;1033;393	0	12.076	3.5	3.5	4.7	2.3	4.7	11.8	36420000	5823100	4173800	6960100	2381800	2401200
E9PE20;P49458-2;P49458	E9PE20;P49458-2;P49458	1;1;1	1;1;1	1;1;1	Signal recognition particle 9 kDa protein	SRP9	Signal recognition particle 9 kDa protein;Isoform 2 of Signal recognition particle 9 kDa protein;Signal recognition particle 9 kDa protein	3	1	1	1	1	1	1	1	1	1	1	1	1	1	1	1	1	1	1	1	1	1	16.7	16.7	16.7	7.6677	66	66;82;86	0.00078493	8.3687	16.7	16.7	16.7	16.7	16.7	16.7	43579000	4009900	6220500	12109000	7068200	7111900
E9PF19;Q9Y4P3	E9PF19;Q9Y4P3	1;1	1;1	1;1	Transducin beta-like protein 2	TBL2	Transducin beta-like protein 2;Transducin beta-like protein 2	2	1	1	1	1	1	1	0	0	0	1	1	1	0	0	0	1	1	1	0	0	0	3.2	3.2	3.2	45.935	411	411;447	0.00064683	4.3183	3.2	3.2	3.2	0	0	0	1786400	1786400	0	0	0	0
Q504U8;E9PFD7;P00533-2;P00533-4;P00533-3;P00533;A0A1W2PRR9;C9JYS6	Q504U8;E9PFD7;P00533-2;P00533-4;P00533-3;P00533;A0A1W2PRR9	3;3;3;3;3;3;2;1	3;3;3;3;3;3;2;1	3;3;3;3;3;3;2;1	Receptor protein-tyrosine kinase;Epidermal growth factor receptor	EGFR	Receptor protein-tyrosine kinase;Receptor protein-tyrosine kinase;Isoform 2 of Epidermal growth factor receptor;Isoform 4 of Epidermal growth factor receptor;Isoform 3 of Epidermal growth factor receptor;Epidermal growth factor receptor;Epidermal growth fa	8	3	3	3	0	0	0	1	1	2	0	0	0	1	1	2	0	0	0	1	1	2	4.3	4.3	4.3	120.69	1091	1091;1165;405;628;705;1210;464;128	0	11.097	0	0	0	1.6	1.7	2.7	8171400	0	0	0	0	3884100
E9PFN5;Q9Y2Q3;Q9Y2Q3-4;Q9Y2Q3-3;Q9Y2Q3-2;C9JNT3	E9PFN5;Q9Y2Q3;Q9Y2Q3-4;Q9Y2Q3-3;Q9Y2Q3-2;C9JNT3	4;4;3;3;3;2	4;4;3;3;3;2	4;4;3;3;3;2	Glutathione S-transferase kappa 1	GSTK1	Glutathione S-transferase kappa;Glutathione S-transferase kappa 1;Isoform 4 of Glutathione S-transferase kappa 1;Isoform 3 of Glutathione S-transferase kappa 1;Isoform 2 of Glutathione S-transferase kappa 1;Glutathione S-transferase kappa 1 (Fragment)	6	4	4	4	1	1	0	2	1	3	1	1	0	2	1	3	1	1	0	2	1	3	29.5	29.5	29.5	21.707	190	190;226;183;214;282;118	0.00070028	5.8503	7.4	8.4	0	13.2	7.4	23.7	7470000	1204300	0	0	3095200	0
E9PGC8;P78559;P78559-2	E9PGC8;P78559;P78559-2	31;31;30	30;30;29	30;30;29	Microtubule-associated protein 1A;MAP1A heavy chain;MAP1 light chain LC2	MAP1A	Microtubule-associated protein 1A;Microtubule-associated protein 1A;Isoform 2 of Microtubule-associated protein 1A	3	31	30	30	22	18	23	0	1	1	21	17	22	0	0	0	21	17	22	0	0	0	19.5	19.2	19.2	331.25	3041	3041;2803;2805	0	113.04	14.9	12.4	15.6	0	0.3	0.3	272930000	114700000	48040000	110190000	0	0
E9PGT1;Q15631;H7C1D4;Q15631-2	E9PGT1;Q15631;H7C1D4	5;5;3;1	5;5;3;1	5;5;3;1	Translin	TSN	Translin;Translin;Translin (Fragment)	4	5	5	5	4	4	5	3	3	3	4	4	5	3	3	3	4	4	5	3	3	3	34.1	34.1	34.1	25.572	223	223;228;185;148	0	14.419	27.4	27.4	34.1	20.2	20.2	22	105880000	15171000	10078000	33756000	19682000	11319000
E9PGT6;Q99627;Q99627-2;H7C3S9	E9PGT6;Q99627;Q99627-2	3;3;2;1	3;3;2;1	3;3;2;1	COP9 signalosome complex subunit 8	COPS8	COP9 signalosome complex subunit 8;COP9 signalosome complex subunit 8;Isoform 2 of COP9 signalosome complex subunit 8	4	3	3	3	1	1	2	2	2	2	1	1	2	2	2	2	1	1	2	2	2	2	39.3	39.3	39.3	19.344	173	173;209;160;83	0	13.133	8.1	8.1	30.6	16.8	16.8	30.6	47827000	13489000	0	17715000	8296900	3896000
E9PH64;Q9Y6M9	E9PH64;Q9Y6M9	1;1	1;1	1;1	NADH dehydrogenase [ubiquinone] 1 beta subcomplex subunit 9	NDUFB9	NADH dehydrogenase [ubiquinone] 1 beta subcomplex subunit 9;NADH dehydrogenase [ubiquinone] 1 beta subcomplex subunit 9	2	1	1	1	0	0	0	1	0	0	0	0	0	1	0	0	0	0	0	1	0	0	9.5	9.5	9.5	20.383	168	168;179	0.0089989	2.4457	0	0	0	9.5	0	0	2789100	0	0	0	2789100	0
E9PHN6;F6XZQ7;P28161-2;P28161;E9PLF1;E9PHN7;E9PGV1;Q5T8Q9	E9PHN6;F6XZQ7;P28161-2;P28161;E9PLF1;E9PHN7	5;5;5;5;4;4;1;1	4;4;4;4;3;3;1;0	2;2;2;2;1;1;1;0	Glutathione S-transferase Mu 2	GSTM2	Glutathione S-transferase;Glutathione S-transferase;Isoform 2 of Glutathione S-transferase Mu 2;Glutathione S-transferase Mu 2;Glutathione S-transferase Mu 2 (Fragment);Glutathione S-transferase Mu 2	8	5	4	2	1	2	2	2	3	3	1	2	2	1	2	2	0	0	1	0	1	1	29	24.4	17.1	22.876	193	193;220;191;218;147;181;87;202	0	10.952	6.7	7.3	15.5	11.4	19.7	20.2	36211000	2865600	6317500	8733600	0	11258000
E9PIE4;Q9Y6C9	E9PIE4;Q9Y6C9	6;6	6;6	6;6	Mitochondrial carrier homolog 2	MTCH2	Mitochondrial carrier homolog 2 (Fragment);Mitochondrial carrier homolog 2	2	6	6	6	4	3	4	3	3	3	4	3	4	3	3	3	4	3	4	3	3	3	37	37	37	28.549	262	262;303	0	42.953	25.6	17.6	22.9	22.1	14.5	17.6	76143000	11546000	3867400	17027000	20547000	10134000
E9PIM6;E9PNQ8;P04216;J3QRJ3	E9PIM6;E9PNQ8;P04216;J3QRJ3	3;3;3;2	3;3;3;2	3;3;3;2	Thy-1 membrane glycoprotein	THY1	Thy-1 membrane glycoprotein (Fragment);Thy-1 membrane glycoprotein (Fragment);Thy-1 membrane glycoprotein;Thy-1 membrane glycoprotein	4	3	3	3	0	0	0	2	2	3	0	0	0	2	2	3	0	0	0	2	2	3	25.7	25.7	25.7	16.927	152	152;165;161;144	0	14.395	0	0	0	15.8	15.8	25.7	65838000	0	0	0	19050000	10588000
E9PIQ8;E9PNJ4;G0XQ39;Q13586-2;Q13586	E9PIQ8;E9PNJ4;G0XQ39;Q13586-2;Q13586	1;1;1;1;1	1;1;1;1;1	1;1;1;1;1	Stromal interaction molecule 1	STIM1	Stromal interaction molecule 1 (Fragment);Stromal interaction molecule 1;STIM1L;Isoform 2 of Stromal interaction molecule 1;Stromal interaction molecule 1	5	1	1	1	0	1	0	1	1	0	0	1	0	1	1	0	0	1	0	1	1	0	10.1	10.1	10.1	16.212	139	139;512;791;540;685	0.0041494	2.9666	0	10.1	0	10.1	10.1	0	4713800	0	0	0	1851200	2862600
E9PJ81;E9PRQ7;Q04323;Q04323-2;A0A087WTZ5	E9PJ81;E9PRQ7;Q04323;Q04323-2;A0A087WTZ5	3;3;3;3;2	3;3;3;3;2	3;3;3;3;2	UBX domain-containing protein 1	UBXN1	UBX domain-containing protein 1 (Fragment);UBX domain-containing protein 1;UBX domain-containing protein 1;Isoform 2 of UBX domain-containing protein 1;UBX domain-containing protein 1	5	3	3	3	2	2	2	1	1	1	2	2	2	1	1	1	2	2	2	1	1	1	20.7	20.7	20.7	32.611	290	290;293;297;312;238	0	14.331	10.7	10.7	16.6	10	10	10	28926000	0	3241700	6824800	6093100	7472200
E9PJB2;E9PPG8;Q53FT3	E9PJB2;E9PPG8;Q53FT3	1;1;1	1;1;1	1;1;1	Protein Hikeshi	C11orf73	Protein Hikeshi;Protein Hikeshi;Protein Hikeshi	3	1	1	1	0	0	0	1	0	0	0	0	0	1	0	0	0	0	0	1	0	0	14.1	14.1	14.1	9.9994	92	92;194;197	0.0069646	2.7181	0	0	0	14.1	0	0	0	0	0	0	0	0
E9PJF0;E9PQW4;P27361-3;P27361;E9PBK7;P27361-2;B3KR49;H0YDH9;H0YEX6;E9PRH7	E9PJF0;E9PQW4;P27361-3;P27361;E9PBK7;P27361-2;B3KR49	5;5;5;5;4;4;3;1;1;1	3;3;3;3;2;2;1;0;1;1	3;3;3;3;2;2;1;0;1;1	Mitogen-activated protein kinase;Mitogen-activated protein kinase 3	MAPK3	Mitogen-activated protein kinase;Mitogen-activated protein kinase;Isoform 3 of Mitogen-activated protein kinase 3;Mitogen-activated protein kinase 3;Mitogen-activated protein kinase;Isoform 2 of Mitogen-activated protein kinase 3;Mitogen-activated protein	10	5	3	3	2	1	4	1	3	2	0	0	2	1	2	1	0	0	2	1	2	1	26.9	14.6	14.6	35.737	316	316;339;357;379;311;335;265;87;121;136	0.00065445	4.4795	12.3	7.6	24.1	7.3	14.9	14.9	19926000	0	0	6627400	3761500	4533900
E9PK85;P62070-2;P62070-3;P62070;P62070-4	E9PK85;P62070-2;P62070-3;P62070;P62070-4	2;2;2;2;2	2;2;2;2;2	2;2;2;2;2	Ras-related protein R-Ras2	RRAS2	Ras-related protein R-Ras2 (Fragment);Isoform 2 of Ras-related protein R-Ras2;Isoform 3 of Ras-related protein R-Ras2;Ras-related protein R-Ras2;Isoform 4 of Ras-related protein R-Ras2	5	2	2	2	1	0	0	1	1	2	1	0	0	1	1	2	1	0	0	1	1	2	14.5	14.5	14.5	19.569	166	166;127;169;204;210	0.0006734	5.0521	7.2	0	0	7.2	7.2	14.5	10878000	565000	0	0	7014200	1600100
H7BXH2;E9PKF6;Q5H9R7-6;Q5H9R7-2;Q5H9R7;Q5H9R7-5;Q5H9R7-3;Q5H9R7-4;H0YEN2;E9PQP7	H7BXH2;E9PKF6;Q5H9R7-6;Q5H9R7-2;Q5H9R7;Q5H9R7-5;Q5H9R7-3;Q5H9R7-4;H0YEN2;E9PQP7	4;4;4;4;4;4;3;3;2;2	4;4;4;4;4;4;3;3;2;2	4;4;4;4;4;4;3;3;2;2	Serine/threonine-protein phosphatase 6 regulatory subunit 3	PPP6R3	Serine/threonine-protein phosphatase 6 regulatory subunit 3;Serine/threonine-protein phosphatase 6 regulatory subunit 3;Isoform 6 of Serine/threonine-protein phosphatase 6 regulatory subunit 3;Isoform 2 of Serine/threonine-protein phosphatase 6 regulatory	10	4	4	4	0	0	4	0	0	0	0	0	4	0	0	0	0	0	4	0	0	0	6.3	6.3	6.3	92.407	827	827;838;844;867;873;879;791;793;580;641	0	10.04	0	0	6.3	0	0	0	13481000	0	0	13481000	0	0
E9PLK3;P55786;P55786-2;A6NEC2;E9PP11;H0YDG0;E9PJY4;E9PPD4;A6NEC2-3;A6NEC2-2;H0YCQ5;E9PJF9;E9PPZ2	E9PLK3;P55786;P55786-2	22;22;20;9;5;4;3;3;3;3;2;1;1	22;22;20;9;5;4;3;3;3;3;2;1;1	22;22;20;9;5;4;3;3;3;3;2;1;1	Puromycin-sensitive aminopeptidase	NPEPPS	Aminopeptidase;Puromycin-sensitive aminopeptidase;Isoform 2 of Puromycin-sensitive aminopeptidase	13	22	22	22	13	10	11	10	10	15	13	10	11	10	10	15	13	10	11	10	10	15	32.9	32.9	32.9	102.99	915	915;919;839;478;201;169;141;163;163;263;65;134;178	0	80.254	18.1	15.1	15.1	15.1	15.8	22.8	241450000	50854000	10050000	42827000	23761000	50511000
E9PLM9;E9PR04;E9PQR7;E9PM90;Q9UK41;Q9UK41-2	E9PLM9;E9PR04;E9PQR7;E9PM90;Q9UK41;Q9UK41-2	1;1;1;1;1;1	1;1;1;1;1;1	1;1;1;1;1;1	Vacuolar protein sorting-associated protein 28 homolog	VPS28	Vacuolar protein sorting-associated protein 28 homolog;Vacuolar protein sorting-associated protein 28 homolog (Fragment);Vacuolar protein sorting-associated protein 28 homolog (Fragment);Vacuolar protein sorting-associated protein 28 homolog (Fragment);Vac	6	1	1	1	0	0	0	1	1	0	0	0	0	1	1	0	0	0	0	1	1	0	71.4	71.4	71.4	3.9415	35	35;53;161;185;221;233	0.00063052	3.9345	0	0	0	71.4	71.4	0	8366200	0	0	0	3676100	4690000
I3L3B4;F8W9H0;E9PLN8;Q9BQB6-3;Q9BQB6-2;Q9BQB6	I3L3B4;F8W9H0;E9PLN8;Q9BQB6-3;Q9BQB6-2;Q9BQB6	1;1;1;1;1;1	1;1;1;1;1;1	1;1;1;1;1;1	Vitamin K epoxide reductase complex subunit 1	VKORC1	Uncharacterized protein (Fragment);Vitamin K epoxide reductase complex subunit 1;Uncharacterized protein (Fragment);Isoform 3 of Vitamin K epoxide reductase complex subunit 1;Isoform 2 of Vitamin K epoxide reductase complex subunit 1;Vitamin K epoxide redu	6	1	1	1	1	1	1	0	0	0	1	1	1	0	0	0	1	1	1	0	0	0	12.5	12.5	12.5	11.082	104	104;149;166;92;156;163	0.00068493	5.3688	12.5	12.5	12.5	0	0	0	9774800	6683900	3090900	0	0	0
E9PRZ9;E9PM92;O00193	E9PRZ9;E9PM92;O00193	1;1;1	1;1;1	1;1;1	Small acidic protein	C11orf58;SMAP	Chromosome 11 open reading frame 58 (Fragment);Chromosome 11 open reading frame 58;Small acidic protein	3	1	1	1	1	1	1	1	1	1	1	1	1	1	1	1	1	1	1	1	1	1	17.8	17.8	17.8	10.038	90	90;157;183	0.00070423	5.8993	17.8	17.8	17.8	17.8	17.8	17.8	23187000	12147000	0	8621700	1469200	949170
E9PMH2;O00170;V9GYQ3	E9PMH2;O00170;V9GYQ3	2;2;1	2;2;1	2;2;1	AH receptor-interacting protein	AIP	Peptidylprolyl isomerase (Fragment);AH receptor-interacting protein;AH receptor-interacting protein (Fragment)	3	2	2	2	0	1	1	0	0	2	0	1	1	0	0	2	0	1	1	0	0	2	13.4	13.4	13.4	26.595	232	232;330;188	0	9.688	0	5.2	8.2	0	0	13.4	16299000	0	1765000	6817300	0	0
E9PNW4;E9PR17;P13987;H0YET2	E9PNW4;E9PR17;P13987;H0YET2	2;2;2;1	2;2;2;1	2;2;2;1	CD59 glycoprotein	CD59	CD59 glycoprotein;CD59 glycoprotein;CD59 glycoprotein;CD59 glycoprotein (Fragment)	4	2	2	2	2	2	2	1	0	1	2	2	2	1	0	1	2	2	2	1	0	1	22.2	22.2	22.2	11.985	108	108;130;128;52	0.00062972	3.9141	22.2	22.2	22.2	11.1	0	11.1	65185000	19283000	11284000	21359000	6460300	0
E9PPJ0;Q13435;E9PJT3;E9PJ04;H0YCG1;H0YEX5;E9PIL8	E9PPJ0;Q13435;E9PJT3;E9PJ04;H0YCG1	9;9;5;5;5;2;1	9;9;5;5;5;2;1	9;9;5;5;5;2;1	Splicing factor 3B subunit 2	SF3B2	Splicing factor 3B subunit 2;Splicing factor 3B subunit 2;Splicing factor 3B subunit 2 (Fragment);Splicing factor 3B subunit 2 (Fragment);Splicing factor 3B subunit 2 (Fragment)	7	9	9	9	4	3	5	5	6	6	4	3	5	5	6	6	4	3	5	5	6	6	18.5	18.5	18.5	98.169	878	878;895;273;353;387;315;80	0	27.274	7.5	4.2	8.4	8	10.6	11	133000000	17773000	7161500	30135000	18953000	28787000
E9PPX6;Q5TC12-3	E9PPX6;Q5TC12-3	1;1	1;1	1;1		ATPAF1	ATP synthase mitochondrial F1 complex assembly factor 1;Isoform 3 of ATP synthase mitochondrial F1 complex assembly factor 1	2	1	1	1	1	1	1	1	1	1	1	1	1	1	1	1	1	1	1	1	1	1	28.9	28.9	28.9	5.1488	45	45;240	0.0042093	3.1612	28.9	28.9	28.9	28.9	28.9	28.9	426910000	66248000	34079000	68060000	84008000	81457000
E9PQ68;O95169-3;O95169-2;O95169	E9PQ68;O95169-3;O95169-2;O95169	1;1;1;1	1;1;1;1	1;1;1;1	NADH dehydrogenase [ubiquinone] 1 beta subcomplex subunit 8, mitochondrial	NDUFB8	Uncharacterized protein;Isoform 3 of NADH dehydrogenase [ubiquinone] 1 beta subcomplex subunit 8, mitochondrial;Isoform 2 of NADH dehydrogenase [ubiquinone] 1 beta subcomplex subunit 8, mitochondrial;NADH dehydrogenase [ubiquinone] 1 beta subcomplex subuni	4	1	1	1	0	0	0	1	0	1	0	0	0	1	0	1	0	0	0	1	0	1	10.1	10.1	10.1	18.603	159	159;155;172;186	0.0079772	2.5694	0	0	0	10.1	0	10.1	7484500	0	0	0	3038600	0
H7BYV1;E9PS44;E9PQN9;P13164;Q01629;Q01628	H7BYV1;E9PS44;E9PQN9;P13164;Q01629;Q01628	1;1;1;1;1;1	1;1;1;1;1;1	1;1;1;1;1;1	Interferon-induced transmembrane protein 1;Interferon-induced transmembrane protein 2;Interferon-induced transmembrane protein 3	IFITM2;IFITM3;IFITM1	Interferon-induced transmembrane protein 2 (Fragment);Interferon-induced transmembrane protein 3;Interferon-induced transmembrane protein 2;Interferon-induced transmembrane protein 1;Interferon-induced transmembrane protein 2;Interferon-induced transmembra	6	1	1	1	0	0	0	1	1	1	0	0	0	1	1	1	0	0	0	1	1	1	21.6	21.6	21.6	8.0866	74	74;112;112;125;132;133	0.00062578	3.8299	0	0	0	21.6	21.6	21.6	4546000	0	0	0	2655300	1890700
E9PQY2;Q9NQP4	E9PQY2;Q9NQP4	2;2	2;2	2;2	Prefoldin subunit 4	PFDN4	Prefoldin subunit 4;Prefoldin subunit 4	2	2	2	2	1	1	0	2	2	2	1	1	0	2	2	2	1	1	0	2	2	2	19.9	19.9	19.9	15.598	136	136;134	0	10.698	8.8	11	0	19.9	19.9	19.9	47713000	10277000	839100	0	15245000	10262000
E9PR30;P62861	E9PR30;P62861	1;1	1;1	1;1	40S ribosomal protein S30	FAU	40S ribosomal protein S30;40S ribosomal protein S30	2	1	1	1	1	1	1	1	1	1	1	1	1	1	1	1	1	1	1	1	1	1	10.2	10.2	10.2	10.905	98	98;59	0.00066845	4.836	10.2	10.2	10.2	10.2	10.2	10.2	51881000	10036000	5745900	0	11540000	10793000
F2Z2Y4;O00764;O00764-3;O00764-2	F2Z2Y4;O00764;O00764-3;O00764-2	8;8;7;5	8;8;7;5	8;8;7;5	Pyridoxal kinase	PDXK	Pyridoxal kinase;Pyridoxal kinase;Isoform 3 of Pyridoxal kinase;Isoform 2 of Pyridoxal kinase	4	8	8	8	5	6	7	4	3	2	5	6	7	4	3	2	5	6	7	4	3	2	49.6	49.6	49.6	30.638	272	272;312;239;284	0	45.431	30.1	36.4	43.4	35.7	18.8	16.2	156550000	25920000	25480000	67958000	12973000	18080000
F2Z2Y8;Q9H0E2;E9PNS3;E9PP67;E9PQ25;E7EN89;Q9H0E2-2	F2Z2Y8;Q9H0E2;E9PNS3;E9PP67;E9PQ25;E7EN89;Q9H0E2-2	2;2;1;1;1;1;1	2;2;1;1;1;1;1	2;2;1;1;1;1;1	Toll-interacting protein	TOLLIP	Toll-interacting protein;Toll-interacting protein;Toll-interacting protein;Toll-interacting protein;Toll-interacting protein (Fragment);Toll interacting protein, isoform CRA_b;Isoform 2 of Toll-interacting protein	7	2	2	2	1	0	1	1	2	1	1	0	1	1	2	1	1	0	1	1	2	1	12.7	12.7	12.7	23.28	213	213;274;80;179;186;246;205	0.00068871	5.4973	6.1	0	6.1	6.1	12.7	6.1	24337000	8855600	0	3680100	4279600	4363000
F5GWE5;Q00169;I3L471;I3L4U7;I3L4H1;I3L3W1;I3L2X8;I3L4C0;I3L459	F5GWE5;Q00169;I3L471;I3L4U7;I3L4H1	4;4;2;2;2;1;1;1;1	4;4;2;2;2;1;1;1;1	4;4;2;2;2;1;1;1;1	Phosphatidylinositol transfer protein alpha isoform	PITPNA	Phosphatidylinositol transfer protein alpha isoform;Phosphatidylinositol transfer protein alpha isoform;Phosphatidylinositol transfer protein alpha isoform;Phosphatidylinositol transfer protein alpha isoform (Fragment);Phosphatidylinositol transfer protein	9	4	4	4	0	0	1	2	2	2	0	0	1	2	2	2	0	0	1	2	2	2	18.1	18.1	18.1	31.802	270	270;270;98;121;209;44;83;115;142	0.00075988	7.6893	0	0	2.6	6.3	7.4	9.6	11087000	0	0	0	3456500	4200300
F5H5V4;F5GX23;J3KN29;O00233-2;O00233;F5H7X1;F5H169;O00233-3	F5H5V4;F5GX23;J3KN29;O00233-2;O00233;F5H7X1	4;4;4;4;4;3;1;1	4;4;4;4;4;3;1;1	4;4;4;4;4;3;1;1	26S proteasome non-ATPase regulatory subunit 9	PSMD9	26S proteasome non-ATPase regulatory subunit 9 (Fragment);26S proteasome non-ATPase regulatory subunit 9;26S proteasome non-ATPase regulatory subunit 9;Isoform p27-S of 26S proteasome non-ATPase regulatory subunit 9;26S proteasome non-ATPase regulatory sub	8	4	4	4	4	0	1	2	1	1	4	0	1	2	1	1	4	0	1	2	1	1	30.7	30.7	30.7	16.913	153	153;179;222;209;223;85;128;118	0	11.026	30.7	0	10.5	17	10.5	10.5	22341000	12488000	0	0	9852400	0
F5GX39;Q15363;E7EQ72	F5GX39;Q15363;E7EQ72	4;4;3	4;4;3	4;4;3	Transmembrane emp24 domain-containing protein 2	TMED2	Transmembrane emp24 domain-containing protein 2;Transmembrane emp24 domain-containing protein 2;Transmembrane emp24 domain-containing protein 2 (Fragment)	3	4	4	4	4	3	3	2	2	3	4	3	3	2	2	3	4	3	3	2	2	3	43.1	43.1	43.1	13.631	116	116;201;166	0	27.134	43.1	31.9	31.9	31.9	21.6	32.8	172930000	47934000	14803000	76724000	6948700	9512700
F5GX77;Q9UI30;F5GYQ2;Q9UI30-2	F5GX77;Q9UI30;F5GYQ2;Q9UI30-2	2;2;1;1	2;2;1;1	2;2;1;1	Multifunctional methyltransferase subunit TRM112-like protein	TRMT112	Multifunctional methyltransferase subunit TRM112-like protein;Multifunctional methyltransferase subunit TRM112-like protein;Multifunctional methyltransferase subunit TRM112-like protein;Isoform 2 of Multifunctional methyltransferase subunit TRM112-like pro	4	2	2	2	1	1	2	1	1	1	1	1	2	1	1	1	1	1	2	1	1	1	24.5	24.5	24.5	11.972	106	106;125;81;120	0.00074349	7.1491	11.3	11.3	24.5	11.3	11.3	11.3	26377000	7067800	808480	10473000	1884000	4420700
F5GXJ9;Q13740-2;Q13740;H7C543;Q13740-4;Q13740-3	F5GXJ9;Q13740-2;Q13740;H7C543;Q13740-4	4;4;4;2;2;1	4;4;4;2;2;1	4;4;4;2;2;1	CD166 antigen	ALCAM	CD166 antigen;Isoform 2 of CD166 antigen;CD166 antigen;CD166 antigen (Fragment);Isoform 4 of CD166 antigen	6	4	4	4	3	0	2	1	3	2	3	0	2	1	3	2	3	0	2	1	3	2	13.2	13.2	13.2	59.528	532	532;570;583;344;305;133	0	11.52	9.6	0	7.5	3.6	11.1	7.5	44549000	7944000	0	19237000	0	9267300
F5H7R9;F5GXR3;P20962	F5H7R9;F5GXR3;P20962	1;1;1	1;1;1	1;1;1	Parathymosin	PTMS	Parathymosin (Fragment);Parathymosin;Parathymosin	3	1	1	1	1	1	1	0	0	0	1	1	1	0	0	0	1	1	1	0	0	0	19.3	19.3	19.3	6.2542	57	57;104;102	0.00306	3.4325	19.3	19.3	19.3	0	0	0	29535000	11699000	5976900	11858000	0	0
F5GZ49;F5H0U5;Q9NZD2	F5GZ49;F5H0U5;Q9NZD2	1;1;1	1;1;1	1;1;1	Glycolipid transfer protein	GLTP	Glycolipid transfer protein;Glycolipid transfer protein;Glycolipid transfer protein	3	1	1	1	0	0	1	0	0	0	0	0	1	0	0	0	0	0	1	0	0	0	22.4	22.4	22.4	7.2826	67	67;190;209	0.002457	3.5194	0	0	22.4	0	0	0	3182700	0	0	3182700	0	0
F5GZS6;J3KPF3;P08195-2;P08195-3;P08195;P08195-4;H0YFS2;F5H0E2;F5H867;F5GZI0;F5GZR9;H0YFX4	F5GZS6;J3KPF3;P08195-2;P08195-3;P08195;P08195-4	15;15;15;15;15;15;6;5;3;3;1;1	15;15;15;15;15;15;6;5;3;3;1;1	15;15;15;15;15;15;6;5;3;3;1;1	4F2 cell-surface antigen heavy chain	SLC3A2	4F2 cell-surface antigen heavy chain;4F2 cell-surface antigen heavy chain;Isoform 2 of 4F2 cell-surface antigen heavy chain;Isoform 3 of 4F2 cell-surface antigen heavy chain;4F2 cell-surface antigen heavy chain;Isoform 4 of 4F2 cell-surface antigen heavy c	12	15	15	15	0	0	0	11	14	12	0	0	0	11	14	12	0	0	0	11	14	12	31.4	31.4	31.4	64.872	599	599;631;529;568;630;661;247;145;135;175;47;122	0	90.937	0	0	0	24.5	29	28.4	252280000	0	0	0	70142000	81405000
F5H345;P08397-4;P08397-3;P08397-2;P08397	F5H345;P08397-4;P08397-3;P08397-2;P08397	1;1;1;1;1	1;1;1;1;1	1;1;1;1;1	Porphobilinogen deaminase	HMBS	Porphobilinogen deaminase;Isoform 4 of Porphobilinogen deaminase;Isoform 3 of Porphobilinogen deaminase;Isoform 2 of Porphobilinogen deaminase;Porphobilinogen deaminase	5	1	1	1	0	0	0	1	1	1	0	0	0	1	1	1	0	0	0	1	1	1	6.1	6.1	6.1	35.761	330	330;304;321;344;361	0.00071429	6.2736	0	0	0	6.1	6.1	6.1	9190800	0	0	0	3878200	2667700
F5H365;Q15436;Q15436-2;G3V4V1;G3V1W4;G3V3G5;G3V2R6;G3V5X8;G3V4Q2;Q5QPE2;Q15437;G3V5K1	F5H365;Q15436;Q15436-2	13;13;8;5;5;5;5;4;4;3;3;2	13;13;8;5;5;5;5;4;4;3;3;2	13;13;8;5;5;5;5;4;4;3;3;2	Protein transport protein Sec23A	SEC23A	Protein transport protein Sec23A;Protein transport protein Sec23A;Isoform 2 of Protein transport protein Sec23A	12	13	13	13	10	8	8	8	7	9	10	8	8	8	7	9	10	8	8	8	7	9	28	28	28	82.968	736	736;765;563;93;108;140;169;85;86;331;767;40	0	138.12	20.1	16.2	15.1	17.1	12.6	18.3	190540000	49783000	17490000	28632000	24078000	39605000
F5H3C1;O43264-2;O43264	F5H3C1;O43264-2;O43264	1;1;1	1;1;1	1;1;1	Centromere/kinetochore protein zw10 homolog	ZW10	Centromere/kinetochore protein zw10 homolog;Isoform 2 of Centromere/kinetochore protein zw10 homolog;Centromere/kinetochore protein zw10 homolog	3	1	1	1	0	0	0	0	1	0	0	0	0	0	1	0	0	0	0	0	1	0	9.6	9.6	9.6	15.676	135	135;672;779	0.0053254	2.9212	0	0	0	0	9.6	0	0	0	0	0	0	0
F5H4C6;H7C3P4;F6S8M0;P15586-2;P15586;H0YFA9	F5H4C6;H7C3P4;F6S8M0;P15586-2;P15586;H0YFA9	3;3;3;3;3;2	3;3;3;3;3;2	3;3;3;3;3;2	N-acetylglucosamine-6-sulfatase	GNS	N-acetylglucosamine-6-sulfatase (Fragment);N-acetylglucosamine-6-sulfatase;N-acetylglucosamine-6-sulfatase;Isoform 2 of N-acetylglucosamine-6-sulfatase;N-acetylglucosamine-6-sulfatase;N-acetylglucosamine-6-sulfatase (Fragment)	6	3	3	3	2	2	1	0	0	0	2	2	1	0	0	0	2	2	1	0	0	0	13.8	13.8	13.8	28.349	247	247;496;584;532;552;303	0.00071531	6.3053	8.5	8.9	5.3	0	0	0	16783000	2546300	8858400	5378200	0	0
F8VY35;F8VV59;F5H4R6;H0YIV4;P55209-2;P55209;F8W118;F8W543;H0YH88;F8VUX1;B7Z9C2;F8W0J6;P55209-3;F8VRJ2;H0YHC3;F8W020;F8VXI6;F8VVB5;B7Z4K9	F8VY35;F8VV59;F5H4R6;H0YIV4;P55209-2;P55209;F8W118;F8W543;H0YH88;F8VUX1;B7Z9C2;F8W0J6;P55209-3;F8VRJ2;H0YHC3;F8W020;F8VXI6	7;7;7;7;7;7;6;6;5;5;5;5;5;4;4;4;4;1;1	6;6;6;6;6;6;5;5;4;4;4;4;4;3;3;3;3;0;1	6;6;6;6;6;6;5;5;4;4;4;4;4;3;3;3;3;0;1	Nucleosome assembly protein 1-like 1	NAP1L1	Nucleosome assembly protein 1-like 1 (Fragment);Nucleosome assembly protein 1-like 1;Nucleosome assembly protein 1-like 1;Nucleosome assembly protein 1-like 1 (Fragment);Isoform 2 of Nucleosome assembly protein 1-like 1;Nucleosome assembly protein 1-like 1	19	7	6	6	5	4	7	3	1	3	4	3	6	2	1	2	4	3	6	2	1	2	43.6	39.8	39.8	31.02	264	264;327;383;385;368;391;209;328;177;237;349;379;323;114;198;207;215;161;208	0	63.028	36.4	21.2	43.6	17	6.4	17	240790000	48931000	25473000	110090000	26721000	8762200
H0Y555;F5H4Z3;Q5QPM7;Q92530	H0Y555;F5H4Z3;Q5QPM7;Q92530	1;1;1;1	1;1;1;1	1;1;1;1	Proteasome inhibitor PI31 subunit	PSMF1	Proteasome inhibitor PI31 subunit (Fragment);Proteasome inhibitor PI31 subunit (Fragment);Proteasome inhibitor PI31 subunit;Proteasome inhibitor PI31 subunit	4	1	1	1	0	0	0	0	1	1	0	0	0	0	1	1	0	0	0	0	1	1	11.2	11.2	11.2	11.487	107	107;127;263;271	0.0012469	3.7854	0	0	0	0	11.2	11.2	4749500	0	0	0	0	2571400
F5H579;Q9HA77	F5H579;Q9HA77	1;1	1;1	1;1	Probable cysteine--tRNA ligase, mitochondrial	CARS2	Probable cysteine--tRNA ligase, mitochondrial (Fragment);Probable cysteine--tRNA ligase, mitochondrial	2	1	1	1	0	0	1	0	0	0	0	0	1	0	0	0	0	0	1	0	0	0	9.9	9.9	9.9	20.445	181	181;564	0.0007278	6.7346	0	0	9.9	0	0	0	1707300	0	0	1707300	0	0
F5H669;Q8N684-2;Q8N684;Q8N684-3;J3QT54;F5H6M0;F5H047	F5H669;Q8N684-2;Q8N684;Q8N684-3;J3QT54;F5H6M0;F5H047	2;2;2;2;1;1;1	2;2;2;2;1;1;1	2;2;2;2;1;1;1	Cleavage and polyadenylation specificity factor subunit 7	CPSF7	Cleavage and polyadenylation-specificity factor subunit 7 (Fragment);Isoform 2 of Cleavage and polyadenylation specificity factor subunit 7;Cleavage and polyadenylation specificity factor subunit 7;Isoform 3 of Cleavage and polyadenylation specificity fact	7	2	2	2	0	0	0	0	2	1	0	0	0	0	2	1	0	0	0	0	2	1	8.8	8.8	8.8	41.265	374	374;462;471;514;204;219;288	0.0041891	3.0609	0	0	0	0	8.8	6.7	5591200	0	0	0	0	3253400
F5H6E2;O00159-2;O00159-3;O00159;I3L204;I3L4D4;I3L501;I3L3Y6;I3L168;I3L3F5	F5H6E2;O00159-2;O00159-3;O00159	15;15;15;15;6;5;5;5;4;4	15;15;15;15;6;5;5;5;4;4	15;15;15;15;6;5;5;5;4;4	Unconventional myosin-Ic	MYO1C	Unconventional myosin-Ic;Isoform 2 of Unconventional myosin-Ic;Isoform 3 of Unconventional myosin-Ic;Unconventional myosin-Ic	10	15	15	15	6	5	4	10	10	10	6	5	4	10	10	10	6	5	4	10	10	10	23.1	23.1	23.1	118.99	1039	1039;1028;1044;1063;267;164;168;170;134;137	0	61.934	9.5	7.1	6.8	14.7	15.2	16.7	139520000	20373000	11244000	12022000	27750000	23366000
F5H6I7;Q6DD88;F5GWF8	F5H6I7;Q6DD88	12;12;2	12;12;2	12;12;2	Atlastin-3	ATL3	Atlastin-3;Atlastin-3	3	12	12	12	9	8	10	10	8	8	9	8	10	10	8	8	9	8	10	10	8	8	41.7	41.7	41.7	58.772	523	523;541;169	0	124.45	28.1	26.6	34.4	36.5	26.6	24.5	389580000	73642000	51823000	92311000	45918000	56458000
G3V1U5;F5H6U7;Q9Y3E0	G3V1U5;F5H6U7;Q9Y3E0	1;1;1	1;1;1	1;1;1	Vesicle transport protein GOT1B	GOLT1B	Golgi transport 1 homolog B (S. cerevisiae), isoform CRA_c;Vesicle transport protein GOT1B;Vesicle transport protein GOT1B	3	1	1	1	1	0	1	0	0	0	1	0	1	0	0	0	1	0	1	0	0	0	18.9	18.9	18.9	8.2139	74	74;128;138	0.00076104	7.7252	18.9	0	18.9	0	0	0	9479900	5551600	0	3928300	0	0
H3BN59;I3L0H8;F6QDS0;H3BQK0;Q9UMR2-2;Q9UMR2-4;Q9NUU7;Q9UMR2;H3BTB3;H3BMQ5;I3L352;Q9UMR2-3;Q9NUU7-2	H3BN59;I3L0H8;F6QDS0;H3BQK0;Q9UMR2-2;Q9UMR2-4;Q9NUU7;Q9UMR2;H3BTB3;H3BMQ5;I3L352;Q9UMR2-3;Q9NUU7-2	2;2;2;2;2;2;2;2;1;1;1;1;1	2;2;2;2;2;2;2;2;1;1;1;1;1	2;2;2;2;2;2;2;2;1;1;1;1;1	ATP-dependent RNA helicase DDX19B;ATP-dependent RNA helicase DDX19A	DDX19A;DDX19B	Uncharacterized protein (Fragment);ATP-dependent RNA helicase DDX19A;HCG2043426, isoform CRA_b;ATP-dependent RNA helicase DDX19B;Isoform 2 of ATP-dependent RNA helicase DDX19B;Isoform 4 of ATP-dependent RNA helicase DDX19B;ATP-dependent RNA helicase DDX19A	13	2	2	2	1	1	0	2	2	2	1	1	0	2	2	2	1	1	0	2	2	2	14.2	14.2	14.2	28.982	261	261;447;479;484;448;453;478;479;129;233;396;370;388	0	11.345	5.7	8.4	0	14.2	14.2	14.2	38128000	0	3430500	0	11548000	10404000
F6TLX2;Q9HC38-2;Q9HC38;I3L3Q4;I3L1I0;Q9HC38-3	F6TLX2;Q9HC38-2;Q9HC38;I3L3Q4	5;5;5;3;2;2	5;5;5;3;2;2	5;5;5;3;2;2	Glyoxalase domain-containing protein 4	GLOD4	Glyoxalase domain-containing protein 4;Isoform 2 of Glyoxalase domain-containing protein 4;Glyoxalase domain-containing protein 4;Glyoxalase domain-containing protein 4 (Fragment)	6	5	5	5	1	3	4	2	2	1	1	3	4	2	2	1	1	3	4	2	2	1	14.3	14.3	14.3	54.719	502	502;298;313;227;115;188	0	14.43	2.6	10.2	12	5	5	2.6	33762000	2753400	4695100	17585000	7326700	0
F8SNU7;Q9H0C8;H7C2I8	F8SNU7;Q9H0C8;H7C2I8	2;2;1	2;2;1	2;2;1	Integrin-linked kinase-associated serine/threonine phosphatase 2C	ILKAP3;ILKAP	Integrin-linked kinase associated phosphatase;Integrin-linked kinase-associated serine/threonine phosphatase 2C;Integrin-linked kinase-associated serine/threonine phosphatase 2C (Fragment)	3	2	2	2	0	0	0	2	1	1	0	0	0	2	1	1	0	0	0	2	1	1	10.6	10.6	10.6	29.869	274	274;392;203	0.00073206	6.8603	0	0	0	10.6	6.9	6.9	6500300	0	0	0	1999900	2604200
F8VNT9;F8VV56;F8W022;F8VWK8;P08962-3;P08962-2;P08962	F8VNT9;F8VV56;F8W022;F8VWK8;P08962-3;P08962-2;P08962	2;2;2;2;2;2;2	2;2;2;2;2;2;2	2;2;2;2;2;2;2	Tetraspanin;CD63 antigen	CD63	CD63 antigen (Fragment);CD63 antigen;Tetraspanin (Fragment);Tetraspanin (Fragment);Isoform 3 of CD63 antigen;Isoform 2 of CD63 antigen;CD63 antigen	7	2	2	2	2	2	1	0	0	0	2	2	1	0	0	0	2	2	1	0	0	0	13.5	13.5	13.5	14.265	133	133;145;215;217;156;215;238	0	12.2	13.5	13.5	7.5	0	0	0	60222000	29997000	17246000	12980000	0	0
F8VPD4;P27708	F8VPD4;P27708	5;5	5;5	5;5	CAD protein;Glutamine-dependent carbamoyl-phosphate synthase;Aspartate carbamoyltransferase;Dihydroorotase	CAD	CAD protein;CAD protein	2	5	5	5	4	2	2	3	2	3	4	2	2	3	2	3	4	2	2	3	2	3	4.4	4.4	4.4	236.02	2162	2162;2225	0	11.004	2.4	2.6	1.3	3.3	1.1	1.8	48111000	12451000	3100100	4373300	10030000	8960100
F8VQE1;Q9UHB6-2;Q9UHB6-5;Q9UHB6;Q9UHB6-4;F8VS07;Q9UHB6-3;F8VRN8	F8VQE1;Q9UHB6-2;Q9UHB6-5;Q9UHB6;Q9UHB6-4;F8VS07;Q9UHB6-3;F8VRN8	6;6;6;6;6;5;5;3	6;6;6;6;6;5;5;3	6;6;6;6;6;5;5;3	LIM domain and actin-binding protein 1	LIMA1	LIM domain and actin-binding protein 1;Isoform Alpha of LIM domain and actin-binding protein 1;Isoform 5 of LIM domain and actin-binding protein 1;LIM domain and actin-binding protein 1;Isoform 4 of LIM domain and actin-binding protein 1;LIM domain and act	8	6	6	6	4	2	1	3	3	3	4	2	1	3	3	3	4	2	1	3	3	3	13.5	13.5	13.5	66.99	598	598;599;600;759;760;456;457;388	0	16.438	9.5	5.4	1.8	6	5.9	6.2	44625000	8199500	1529200	0	14053000	8444300
F8VQR7;F8VW96;Q16527	F8VQR7;F8VW96;Q16527	2;2;2	2;2;2	2;2;2	Cysteine and glycine-rich protein 2	CSRP2	Cysteine and glycine-rich protein 2;Cysteine and glycine-rich protein 2;Cysteine and glycine-rich protein 2	3	2	2	2	0	0	0	2	1	0	0	0	0	2	1	0	0	0	0	2	1	0	13.4	13.4	13.4	20.677	187	187;243;193	0.00065876	4.5886	0	0	0	13.4	8	0	1143600	0	0	0	1143600	0
F8W651;F8VVA7;P61923;F8VYK5;F8VXB1;F8VUC5;F8W156;F8VYZ4;P61923-2;P61923-3;P61923-5;P61923-4	F8W651;F8VVA7;P61923;F8VYK5;F8VXB1;F8VUC5;F8W156;F8VYZ4;P61923-2;P61923-3;P61923-5;P61923-4	2;2;2;1;1;1;1;1;1;1;1;1	2;2;2;1;1;1;1;1;1;1;1;1	2;2;2;1;1;1;1;1;1;1;1;1	Coatomer subunit zeta-1	COPZ1	Coatomer subunit zeta-1;Coatomer subunit zeta-1;Coatomer subunit zeta-1;Coatomer subunit zeta-1;Coatomer subunit zeta-1 (Fragment);Coatomer subunit zeta-1;Coatomer subunit zeta-1;Coatomer subunit zeta-1;Isoform 2 of Coatomer subunit zeta-1;Isoform 3 of Coa	12	2	2	2	2	1	1	2	2	2	2	1	1	2	2	2	2	1	1	2	2	2	27.7	27.7	27.7	13.393	119	119;198;177;89;92;95;107;163;126;154;160;185	0	14.696	27.7	16	11.8	27.7	27.7	27.7	24918000	0	1740700	3689000	6451000	10557000
F8VVL1;O43583	F8VVL1;O43583	3;3	3;3	3;3	Density-regulated protein	DENR	Density-regulated protein;Density-regulated protein	2	3	3	3	2	1	1	0	1	0	2	1	1	0	1	0	2	1	1	0	1	0	24.4	24.4	24.4	17.77	160	160;198	0.00064641	4.2948	13.1	5	11.2	0	8.1	0	0	0	0	0	0	0
F8VXC8;Q8TAQ2-2;Q8TAQ2-3;Q8TAQ2	F8VXC8;Q8TAQ2-2;Q8TAQ2-3;Q8TAQ2	2;2;2;2	2;2;2;2	2;2;2;2	SWI/SNF complex subunit SMARCC2	SMARCC2	SWI/SNF complex subunit SMARCC2;Isoform 2 of SWI/SNF complex subunit SMARCC2;Isoform 3 of SWI/SNF complex subunit SMARCC2;SWI/SNF complex subunit SMARCC2	4	2	2	2	0	0	0	1	1	0	0	0	0	1	1	0	0	0	0	1	1	0	5.5	5.5	5.5	136.18	1245	1245;1130;1152;1214	0.00066401	4.7521	0	0	0	2.6	2.9	0	7022400	0	0	0	1896200	5126200
F8VXU5;Q9UBQ0;Q9UBQ0-2	F8VXU5;Q9UBQ0;Q9UBQ0-2	4;4;4	4;4;4	4;4;4	Vacuolar protein sorting-associated protein 29	VPS29	Vacuolar protein sorting-associated protein 29;Vacuolar protein sorting-associated protein 29;Isoform 2 of Vacuolar protein sorting-associated protein 29	3	4	4	4	1	1	3	3	1	3	1	1	3	3	1	3	1	1	3	3	1	3	27.6	27.6	27.6	23.98	214	214;182;186	0	16.35	4.7	4.7	21.5	21.5	6.1	21.5	31250000	1410700	1282400	9474100	9131500	2102500
F8VZQ9;H0YHG0;P82979	F8VZQ9;H0YHG0;P82979	2;2;2	2;2;2	2;2;2	SAP domain-containing ribonucleoprotein	SARNP	SAP domain-containing ribonucleoprotein;Uncharacterized protein (Fragment);SAP domain-containing ribonucleoprotein	3	2	2	2	0	0	1	0	1	2	0	0	1	0	1	2	0	0	1	0	1	2	9.4	9.4	9.4	24.105	213	213;523;210	0.00064433	4.2401	0	0	4.7	0	4.7	9.4	13922000	0	0	2276500	0	0
F8W031;F8W1K5;F8VXJ7;F8W0J2;F8VP03	F8W031;F8W1K5;F8VXJ7	6;5;5;1;1	5;5;5;0;0	0;0;0;0;0		CNPY2	Uncharacterized protein (Fragment);Protein canopy homolog 2 (Fragment);Protein canopy homolog 2 (Fragment)	5	6	5	0	4	4	4	3	4	5	3	3	3	2	3	4	0	0	0	0	0	0	31.2	27.8	0	29.224	263	263;102;168;75;105	0	22.838	19.8	19	22.8	15.2	19.8	27.4	76794000	25906000	11828000	10832000	7043500	7922200
F8W1A4;P54819-5;P54819-2;P54819;F8VY04;P54819-3;G3V213;F8VZG5;P54819-6;F8VPP1;P54819-4	F8W1A4;P54819-5;P54819-2;P54819;F8VY04;P54819-3;G3V213;F8VZG5;P54819-6	6;6;6;6;5;4;3;3;3;2;1	6;6;6;6;5;4;3;3;3;2;1	6;6;6;6;5;4;3;3;3;2;1	Adenylate kinase 2, mitochondrial;Adenylate kinase 2, mitochondrial;Adenylate kinase 2, mitochondrial, N-terminally processed	AK2	Adenylate kinase 2, mitochondrial;Isoform 5 of Adenylate kinase 2, mitochondrial;Isoform 2 of Adenylate kinase 2, mitochondrial;Adenylate kinase 2, mitochondrial;Adenylate kinase 2, mitochondrial;Isoform 3 of Adenylate kinase 2, mitochondrial;Adenylate kin	11	6	6	6	5	5	4	5	6	5	5	5	4	5	6	5	5	5	4	5	6	5	45.7	45.7	45.7	25.63	232	232;224;232;239;190;202;133;162;191;42;130	0	48.973	38.4	38.4	33.6	38.4	45.7	38.4	208360000	25152000	18081000	31242000	34540000	55150000
F8W6I7;P09651-3;P09651-2;P09651;F8VZ49;H0YH80;Q32P51;F8VTQ5;F8VYN5;F8W646	F8W6I7;P09651-3;P09651-2;P09651;F8VZ49;H0YH80;Q32P51;F8VTQ5	12;12;12;12;8;7;7;6;4;4	12;12;12;12;8;7;7;6;4;4	12;12;12;12;8;7;7;6;4;4	Heterogeneous nuclear ribonucleoprotein A1;Heterogeneous nuclear ribonucleoprotein A1, N-terminally processed;Heterogeneous nuclear ribonucleoprotein A1-like 2	HNRNPA1;HNRNPA1L2	Heterogeneous nuclear ribonucleoprotein A1;Isoform 2 of Heterogeneous nuclear ribonucleoprotein A1;Isoform A1-A of Heterogeneous nuclear ribonucleoprotein A1;Heterogeneous nuclear ribonucleoprotein A1;Heterogeneous nuclear ribonucleoprotein A1 (Fragment);H	10	12	12	12	10	12	9	10	10	9	10	12	9	10	10	9	10	12	9	10	10	9	45.6	45.6	45.6	33.155	307	307;267;320;372;231;191;320;145;113;156	0	228.87	41.7	45.6	36.5	40.4	41.7	36.5	2029000000	384140000	229250000	384470000	409320000	285090000
F8W726;Q14157-4;Q14157-1;Q14157-3;Q14157;Q14157-5;Q5VU77;Q5VU79;Q5VU78;Q5VU81;Q5VU80;H0Y5H6;H7C2T8	F8W726;Q14157-4;Q14157-1;Q14157-3;Q14157;Q14157-5	9;9;9;9;9;9;4;3;3;2;2;2;2	9;9;9;9;9;9;4;3;3;2;2;2;2	9;9;9;9;9;9;4;3;3;2;2;2;2	Ubiquitin-associated protein 2-like	UBAP2L	Ubiquitin-associated protein 2-like;Isoform 4 of Ubiquitin-associated protein 2-like;Isoform 2 of Ubiquitin-associated protein 2-like;Isoform 3 of Ubiquitin-associated protein 2-like;Ubiquitin-associated protein 2-like;Isoform 5 of Ubiquitin-associated pro	13	9	9	9	4	1	1	6	8	6	4	1	1	6	8	6	4	1	1	6	8	6	14.8	14.8	14.8	113.63	1079	1079;976;983;1068;1087;1104;350;265;280;182;234;383;399	0	23.814	7.5	3.7	1	10.8	13.4	10	76848000	14251000	2808900	3074700	11622000	28859000
F8W7C6;A0A087WV22;H7C123;H7C2C5;Q96L21;H7C2U2	F8W7C6;A0A087WV22;H7C123;H7C2C5;Q96L21	8;7;5;5;4;1	1;0;0;0;0;0	1;0;0;0;0;0	60S ribosomal protein L10-like	RPL10;RPL10L	60S ribosomal protein L10;60S ribosomal protein L10;60S ribosomal protein L10 (Fragment);60S ribosomal protein L10 (Fragment);60S ribosomal protein L10-like	6	8	1	1	8	6	7	7	7	8	1	1	1	1	1	1	1	1	1	1	1	1	54	11	11	18.565	163	163;178;91;131;214;28	0	37.886	54	43.6	46.6	49.1	49.1	54	74788000	14131000	9068800	0	20472000	16131000
F8W7Q4;Q96A26;E9PH05	F8W7Q4;Q96A26;E9PH05	3;3;2	3;3;2	3;3;2	Protein FAM162A	FAM162A	Protein FAM162A;Protein FAM162A;Protein FAM162A	3	3	3	3	3	3	3	1	1	0	3	3	3	1	1	0	3	3	3	1	1	0	24.3	24.3	24.3	16.515	144	144;154;141	0	19.249	24.3	24.3	24.3	11.8	11.8	0	38510000	11883000	10724000	10985000	4918300	0
F8W8D4;Q8TBC4-2;Q8TBC4	F8W8D4;Q8TBC4-2;Q8TBC4	2;2;2	2;2;2	2;2;2	NEDD8-activating enzyme E1 catalytic subunit	UBA3	NEDD8-activating enzyme E1 catalytic subunit;Isoform 2 of NEDD8-activating enzyme E1 catalytic subunit;NEDD8-activating enzyme E1 catalytic subunit	3	2	2	2	0	0	0	2	1	1	0	0	0	2	1	1	0	0	0	2	1	1	8.1	8.1	8.1	47.271	422	422;449;463	0.0030544	3.3981	0	0	0	8.1	5.7	5.7	18126000	0	0	0	7752600	6087200
J3KQ45;F8W8W7;O43493-4;O43493-2;O43493-5;O43493-3;O43493	J3KQ45;F8W8W7;O43493-4;O43493-2;O43493-5;O43493-3;O43493	1;1;1;1;1;1;1	1;1;1;1;1;1;1	1;1;1;1;1;1;1	Trans-Golgi network integral membrane protein 2	TGOLN2	Trans-Golgi network integral membrane protein 2;Trans-Golgi network integral membrane protein 2;Isoform 4 of Trans-Golgi network integral membrane protein 2;Isoform TGN46 of Trans-Golgi network integral membrane protein 2;Isoform 5 of Trans-Golgi network i	7	1	1	1	1	0	1	1	1	0	1	0	1	1	1	0	1	0	1	1	1	0	3.1	3.1	3.1	47.879	454	454;479;379;437;447;453;480	0.00064309	4.2168	3.1	0	3.1	3.1	3.1	0	4281400	0	0	0	2855900	1425500
F8W930;Q9Y6M1-1;Q9Y6M1;Q9Y6M1-5;Q9Y6M1-6;Q9Y6M1-3;Q9Y6M1-4	F8W930;Q9Y6M1-1;Q9Y6M1;Q9Y6M1-5;Q9Y6M1-6;Q9Y6M1-3;Q9Y6M1-4	3;3;3;2;2;2;2	3;3;3;2;2;2;2	3;3;3;2;2;2;2	Insulin-like growth factor 2 mRNA-binding protein 2	IGF2BP2	Insulin-like growth factor 2 mRNA-binding protein 2;Isoform 2 of Insulin-like growth factor 2 mRNA-binding protein 2;Insulin-like growth factor 2 mRNA-binding protein 2;Isoform 5 of Insulin-like growth factor 2 mRNA-binding protein 2;Isoform 6 of Insulin-l	7	3	3	3	0	0	0	2	2	0	0	0	0	2	2	0	0	0	0	2	2	0	9.3	9.3	9.3	66.785	605	605;556;599;493;531;536;542	0.00062735	3.8473	0	0	0	6.6	5.3	0	2394500	0	0	0	2394500	0
F8W9J4;Q03001;Q5T0V7;E7ETB9;E9PHM6;F6QMI7;Q03001-13;Q03001-14	F8W9J4;Q03001;Q5T0V7;E7ETB9;E9PHM6;F6QMI7;Q03001-13;Q03001-14	2;2;1;1;1;1;1;1	2;2;1;1;1;1;1;1	2;2;1;1;1;1;1;1	Dystonin	DST	Dystonin;Dystonin;Dystonin (Fragment);Dystonin (Fragment);Dystonin;Dystonin;Isoform 8 of Dystonin;Isoform 9 of Dystonin	8	2	2	2	1	0	1	1	0	0	1	0	1	1	0	0	1	0	1	1	0	0	0.3	0.3	0.3	847.96	7461	7461;7570;689;1479;5497;5537;905;5375	0.0080878	2.6695	0.1	0	0.1	0.1	0	0	4800000	2563400	0	0	2236600	0
F8W9U3;Q96IU4;B4DQI4;Q96IU4-2	F8W9U3;Q96IU4;B4DQI4;Q96IU4-2	5;5;3;3	5;5;3;3	5;5;3;3	Alpha/beta hydrolase domain-containing protein 14B	ABHD14B	Protein ABHD14B;Protein ABHD14B;Protein ABHD14B;Isoform 2 of Protein ABHD14B	4	5	5	5	1	1	1	4	4	3	1	1	1	4	4	3	1	1	1	4	4	3	37.5	37.5	37.5	22.38	208	208;210;188;172	0	19.302	4.8	4.8	4.8	32.7	26.9	27.9	86247000	895810	0	1742800	30819000	24003000
F8WBH7;O95456-2;O95456	F8WBH7;O95456-2;O95456	2;2;2	2;2;2	2;2;2	Proteasome assembly chaperone 1	PSMG1	Proteasome assembly chaperone 1;Isoform 2 of Proteasome assembly chaperone 1;Proteasome assembly chaperone 1	3	2	2	2	0	0	1	1	1	2	0	0	1	1	1	2	0	0	1	1	1	2	38.1	38.1	38.1	7.182	63	63;267;288	0	9.7243	0	0	22.2	15.9	15.9	38.1	18017000	0	0	1240200	2785600	690510
F8WCF6;P59998;P59998-3;R4GN08;H7C0A3;P59998-4;F8WDD7;A0A0A6YYG9;P59998-2	F8WCF6;P59998;P59998-3;R4GN08;H7C0A3;P59998-4;F8WDD7;A0A0A6YYG9;P59998-2	6;6;6;4;4;4;3;3;3	6;6;6;4;4;4;3;3;3	6;6;6;4;4;4;3;3;3	Actin-related protein 2/3 complex subunit 4	ARPC4-TTLL3;ARPC4	Actin-related protein 2/3 complex subunit 4;Actin-related protein 2/3 complex subunit 4;Isoform 3 of Actin-related protein 2/3 complex subunit 4;Actin-related protein 2/3 complex subunit 4 (Fragment);ARPC4-TTLL3 readthrough (Fragment);Isoform 4 of Actin-re	9	6	6	6	4	6	5	4	5	4	4	6	5	4	5	4	4	6	5	4	5	4	44.2	44.2	44.2	21.058	181	181;168;187;77;167;78;113;625;625	0	33.999	21	44.2	32	21	32	21	151530000	27809000	26813000	32416000	11648000	25500000
F8WJN3;Q16630-3;Q16630;Q16630-2;F8W084	F8WJN3;Q16630-3;Q16630;Q16630-2	3;3;3;3;1	3;3;3;3;1	3;3;3;3;1	Cleavage and polyadenylation specificity factor subunit 6	CPSF6	Cleavage and polyadenylation-specificity factor subunit 6;Isoform 3 of Cleavage and polyadenylation specificity factor subunit 6;Cleavage and polyadenylation specificity factor subunit 6;Isoform 2 of Cleavage and polyadenylation specificity factor subunit	5	3	3	3	1	0	2	1	1	3	1	0	2	1	1	3	1	0	2	1	1	3	11.3	11.3	11.3	52.269	478	478;478;551;588;107	0	24.468	5.2	0	7.9	2.7	5.2	11.3	18281000	2781800	0	5759700	1515800	0
G3V0E4;O75439	G3V0E4;O75439	2;2	2;2	2;2	Mitochondrial-processing peptidase subunit beta	PMPCB	Mitochondrial-processing peptidase subunit beta;Mitochondrial-processing peptidase subunit beta	2	2	2	2	0	0	0	2	1	0	0	0	0	2	1	0	0	0	0	2	1	0	6.3	6.3	6.3	54.191	490	490;489	0.0080738	2.6416	0	0	0	6.3	2.4	0	1770600	0	0	0	1770600	0
G3V1D3;G3V180;Q9NY33;Q9NY33-4;Q9NY33-2;E9PQ14;E9PPK9;E9PKK8;E9PQF2;E9PNX5	G3V1D3;G3V180;Q9NY33;Q9NY33-4;Q9NY33-2	9;9;9;8;5;3;3;2;1;1	9;9;9;8;5;3;3;2;1;1	9;9;9;8;5;3;3;2;1;1	Dipeptidyl peptidase 3	DPP3	Dipeptidyl peptidase 3;Dipeptidyl peptidase 3;Dipeptidyl peptidase 3;Isoform 4 of Dipeptidyl peptidase 3;Isoform 2 of Dipeptidyl peptidase 3	10	9	9	9	2	2	2	4	6	4	2	2	2	4	6	4	2	2	2	4	6	4	19.3	19.3	19.3	84.304	756	756;757;737;707;317;177;201;170;90;104	0	26.56	4.5	5.6	4	7	13.1	9.3	61730000	3600000	4131200	1380000	15732000	10833000
G3V1A6;P57764;E9PQ48;E9PNZ0;E9PQR9;E9PIB2	G3V1A6;P57764;E9PQ48;E9PNZ0;E9PQR9;E9PIB2	2;2;1;1;1;1	2;2;1;1;1;1	2;2;1;1;1;1	Gasdermin-D	GSDMD	Gasdermin domain containing 1, isoform CRA_d;Gasdermin-D;Gasdermin-D (Fragment);Gasdermin-D (Fragment);Gasdermin-D (Fragment);Gasdermin-D (Fragment)	6	2	2	2	0	0	0	2	1	1	0	0	0	2	1	1	0	0	0	2	1	1	6.2	6.2	6.2	57.734	532	532;484;114;153;164;277	0	11.014	0	0	0	6.2	2.6	2.6	4044000	0	0	0	2720800	0
G3V1C3;Q9BZZ5-3;Q9BZZ5-2;Q9BZZ5;Q9BZZ5-5;E9PQK6;Q9BZZ5-1;Q9BZZ5-6	G3V1C3;Q9BZZ5-3;Q9BZZ5-2;Q9BZZ5;Q9BZZ5-5;E9PQK6;Q9BZZ5-1;Q9BZZ5-6	4;4;4;4;3;2;2;2	4;4;4;4;3;2;2;2	4;4;4;4;3;2;2;2	Apoptosis inhibitor 5	API5	Apoptosis inhibitor 5;Isoform 3 of Apoptosis inhibitor 5;Isoform 2 of Apoptosis inhibitor 5;Apoptosis inhibitor 5;Isoform 5 of Apoptosis inhibitor 5;Apoptosis inhibitor 5;Isoform 1 of Apoptosis inhibitor 5;Isoform 6 of Apoptosis inhibitor 5	8	4	4	4	2	1	1	3	2	3	2	1	1	3	2	3	2	1	1	3	2	3	10.8	10.8	10.8	57.56	510	510;445;504;524;450;123;438;513	0	17.079	5.7	3.1	3.5	9.2	5.7	7.3	41929000	6961000	3057300	3808400	9807600	9138200
G3V220;O14776-2;O14776	G3V220;O14776-2;O14776	4;4;4	4;4;4	4;4;4	Transcription elongation regulator 1	TCERG1	Transcription elongation regulator 1;Isoform 2 of Transcription elongation regulator 1;Transcription elongation regulator 1	3	4	4	4	0	1	0	0	2	3	0	1	0	0	2	3	0	1	0	0	2	3	4.9	4.9	4.9	116.17	1032	1032;1077;1098	0	8.7132	0	0.9	0	0	2.9	4.1	11659000	0	1052800	0	0	3446300
G3V576;G3V2Q1;P07910;G3V555;G3V575	G3V576;G3V2Q1;P07910;G3V555;G3V575	10;10;10;8;8	1;1;1;1;1	1;1;1;1;1	Heterogeneous nuclear ribonucleoproteins C1/C2	HNRNPC	Heterogeneous nuclear ribonucleoproteins C1/C2;Heterogeneous nuclear ribonucleoproteins C1/C2;Heterogeneous nuclear ribonucleoproteins C1/C2;Heterogeneous nuclear ribonucleoproteins C1/C2 (Fragment);Heterogeneous nuclear ribonucleoproteins C1/C2 (Fragment)	5	10	1	1	9	6	7	4	5	5	1	0	0	0	0	0	1	0	0	0	0	0	50.2	13.4	13.4	25.256	231	231;305;306;175;187	0.00065147	4.4066	47.2	29.9	32.5	20.8	25.5	25.1	5989500	5989500	0	0	0	0
G3V4F7;P61011-2;P61011	G3V4F7;P61011-2;P61011	1;1;1	1;1;1	1;1;1	Signal recognition particle 54 kDa protein	SRP54	Signal recognition particle 54 kDa protein;Isoform 2 of Signal recognition particle 54 kDa protein;Signal recognition particle 54 kDa protein	3	1	1	1	1	0	1	0	0	0	1	0	1	0	0	0	1	0	1	0	0	0	4.3	4.3	4.3	48.67	440	440;455;504	0.0012415	3.7293	4.3	0	4.3	0	0	0	9965700	3731100	0	6234600	0	0
G3V4P8;P60983;G3V3X4	G3V4P8;P60983	3;3;1	3;3;1	3;3;1	Glia maturation factor beta	GMFB	Glia maturation factor beta (Fragment);Glia maturation factor beta	3	3	3	3	2	2	3	2	1	0	2	2	3	2	1	0	2	2	3	2	1	0	33.3	33.3	33.3	17.512	150	150;142;38	0	26.237	18	26	33.3	26	15.3	0	42315000	3894900	7455000	19702000	6939000	4323800
G3V580;O14744-3;O14744-5;O14744-2;O14744;G3V5L5;G3V2X6;C9JSX3;H0YJX6;G3V2L6;O14744-4	G3V580;O14744-3;O14744-5;O14744-2;O14744;G3V5L5;G3V2X6;C9JSX3;H0YJX6	3;3;3;3;3;2;2;2;2;1;1	3;3;3;3;3;2;2;2;2;1;1	3;3;3;3;3;2;2;2;2;1;1	Protein arginine N-methyltransferase 5;Protein arginine N-methyltransferase 5, N-terminally processed	PRMT5	Protein arginine N-methyltransferase 5 (Fragment);Isoform 3 of Protein arginine N-methyltransferase 5;Isoform 5 of Protein arginine N-methyltransferase 5;Isoform 2 of Protein arginine N-methyltransferase 5;Protein arginine N-methyltransferase 5;Protein arg	11	3	3	3	1	1	2	0	1	1	1	1	2	0	1	1	1	1	2	0	1	1	18.3	18.3	18.3	20.375	180	180;576;593;620;637;169;185;186;279;183;466	0.00072098	6.4333	5	5.6	13.3	0	7.8	7.8	10637000	1398000	0	5517800	0	1789900
G3V5Z7;P60900;G3V295;P60900-2;G3V3I1;G3V3U4;P60900-3;H0YJC4;G3V4S5;G3V2S7	G3V5Z7;P60900;G3V295;P60900-2;G3V3I1	11;11;10;9;8;5;5;2;1;1	11;11;10;9;8;5;5;2;1;1	11;11;10;9;8;5;5;2;1;1	Proteasome subunit alpha type;Proteasome subunit alpha type-6	PSMA6	Proteasome subunit alpha type;Proteasome subunit alpha type-6;Proteasome subunit alpha type;Isoform 2 of Proteasome subunit alpha type-6;Proteasome subunit alpha type	10	11	11	11	9	7	9	10	7	9	9	7	9	10	7	9	9	7	9	10	7	9	54.8	54.8	54.8	28.147	252	252;246;203;227;148;107;167;85;41;67	0	48.36	46.4	35.7	43.7	50.4	34.9	46.4	361620000	65427000	15604000	63825000	75972000	50615000
G3XAI2;P07942;E7EPA6	G3XAI2;P07942;E7EPA6	12;12;6	12;12;6	12;12;6	Laminin subunit beta-1	LAMB1	Laminin subunit beta-1;Laminin subunit beta-1;Laminin subunit beta-1	3	12	12	12	0	0	0	8	8	9	0	0	0	8	8	9	0	0	0	8	8	9	10.9	10.9	10.9	200.48	1810	1810;1786;850	0	53.548	0	0	0	7.8	6.7	8.1	85767000	0	0	0	20705000	25754000
G5E9Q6;P35080-2;C9J0J7;C9JQ45;P35080;C9J2N0;C9J712;C9J5V8;F2Z3G0	G5E9Q6;P35080-2;C9J0J7;C9JQ45;P35080;C9J2N0	6;6;4;4;4;3;2;1;1	6;6;4;4;4;3;2;1;1	6;6;4;4;4;3;2;1;1	Profilin;Profilin-2	PFN2	Profilin;Isoform IIb of Profilin-2;Profilin;Profilin;Profilin-2;Profilin	9	6	6	6	3	5	5	3	5	5	3	5	5	3	5	5	3	5	5	3	5	5	52.1	52.1	52.1	20.787	188	188;140;91;110;140;125;91;45;55	0	77.681	19.7	37.2	47.9	19.7	47.9	47.9	225880000	16943000	21094000	38530000	31855000	53415000
H7C5F2;H7C5H3;G5E9W7;G5E9V5;P82650-2;P82650;C9J5D8	H7C5F2;H7C5H3;G5E9W7;G5E9V5;P82650-2;P82650;C9J5D8	2;2;2;2;2;2;1	2;2;2;2;2;2;1	2;2;2;2;2;2;1	28S ribosomal protein S22, mitochondrial	MRPS22	28S ribosomal protein S22, mitochondrial (Fragment);28S ribosomal protein S22, mitochondrial (Fragment);28S ribosomal protein S22, mitochondrial;28S ribosomal protein S22, mitochondrial;Isoform 2 of 28S ribosomal protein S22, mitochondrial;28S ribosomal pr	7	2	2	2	0	0	0	0	1	2	0	0	0	0	1	2	0	0	0	0	1	2	16.4	16.4	16.4	18.573	165	165;200;319;359;168;360;51	0.00063532	4.0501	0	0	0	0	7.3	16.4	2949000	0	0	0	0	0
G5EA09;O00560-3;O00560-2;O00560;B4DHN5;E9PBU7	G5EA09;O00560-3;O00560-2;O00560;B4DHN5;E9PBU7	2;2;2;2;1;1	2;2;2;2;1;1	2;2;2;2;1;1	Syntenin-1	SDCBP	Syndecan binding protein (Syntenin), isoform CRA_a;Isoform 3 of Syntenin-1;Isoform 2 of Syntenin-1;Syntenin-1;Syntenin-1;Syntenin-1	6	2	2	2	0	0	2	0	0	0	0	0	2	0	0	0	0	0	2	0	0	0	10.7	10.7	10.7	34.819	318	318;292;297;298;239;244	0.00075415	7.555	0	0	10.7	0	0	0	5983900	0	0	5983900	0	0
G5EA31;P53992;P53992-2	G5EA31;P53992	8;8;2	8;8;2	8;8;2	Protein transport protein Sec24C	SEC24C	Protein transport protein Sec24C;Protein transport protein Sec24C	3	8	8	8	2	2	3	6	2	4	2	2	3	6	2	4	2	2	3	6	2	4	11.8	11.8	11.8	111.98	1042	1042;1094;342	0	21.612	3.3	3.3	5	8.8	3.2	6.1	46671000	2195600	5192100	11433000	13558000	2395800
G8JLB6;P31943;E9PCY7;D6RIT2;D6RIU0;D6RBM0;E7EQJ0;D6RAM1;D6R9T0;D6RFM3;D6RDU3;D6RJ04;D6RIH9;H0YB39;E5RGV0;E7EN40;D6RDL0;H0YBG7;H0YBD7;D6R9D3;D6RF17;E5RGH4;E5RJ94;H0YAQ2	G8JLB6;P31943;E9PCY7;D6RIT2;D6RIU0;D6RBM0;E7EQJ0;D6RAM1;D6R9T0;D6RFM3;D6RDU3;D6RJ04;D6RIH9;H0YB39	14;14;13;8;8;8;7;7;7;7;7;7;7;7;6;6;5;5;5;3;3;3;2;2	14;14;13;8;8;8;7;7;7;7;7;7;7;7;6;6;5;5;5;3;3;3;2;2	9;9;8;7;6;6;6;6;6;6;6;6;6;3;4;5;5;2;2;3;3;1;2;1	Heterogeneous nuclear ribonucleoprotein H;Heterogeneous nuclear ribonucleoprotein H, N-terminally processed	HNRNPH1	Heterogeneous nuclear ribonucleoprotein H;Heterogeneous nuclear ribonucleoprotein H;Heterogeneous nuclear ribonucleoprotein H;Heterogeneous nuclear ribonucleoprotein H (Fragment);Heterogeneous nuclear ribonucleoprotein H (Fragment);Heterogeneous nuclear ri	24	14	14	9	12	9	11	13	14	11	12	9	11	13	14	11	7	5	7	8	9	6	40.3	40.3	24.8	51.229	472	472;449;429;164;168;212;115;130;161;163;171;172;184;277;155;166;84;185;194;40;49;100;28;131	0	205.65	36.2	28.8	32.4	39.6	40.3	36.2	1074000000	119440000	83143000	126280000	240770000	243580000
G8JLD5;O00429-4;O00429-5;O00429-3;O00429-2;O00429;O00429-8;O00429-6;F8VZ52;B4DPZ9;F8VUJ9;B4DDQ3;F8VR28;F8VYL3;F8W1W3;O00429-7	G8JLD5;O00429-4;O00429-5;O00429-3;O00429-2;O00429;O00429-8;O00429-6;F8VZ52;B4DPZ9;F8VUJ9;B4DDQ3	4;4;4;4;4;4;4;4;3;2;2;2;1;1;1;1	4;4;4;4;4;4;4;4;3;2;2;2;1;1;1;1	4;4;4;4;4;4;4;4;3;2;2;2;1;1;1;1	Dynamin-1-like protein	DNM1L	Dynamin-1-like protein;Isoform 3 of Dynamin-1-like protein;Isoform 5 of Dynamin-1-like protein;Isoform 2 of Dynamin-1-like protein;Isoform 4 of Dynamin-1-like protein;Dynamin-1-like protein;Isoform 8 of Dynamin-1-like protein;Isoform 6 of Dynamin-1-like pr	16	4	4	4	1	0	2	1	0	1	1	0	2	1	0	1	1	0	2	1	0	1	8	8	8	79.621	712	712;699;710;710;725;736;738;749;261;156;172;180;97;117;168;533	0	11.846	2.5	0	3.8	1.7	0	2.4	2896900	0	0	1778400	0	0
H0Y2W2;Q9NVI7-2;Q9NVI7;Q9NVI7-3;Q5T2N8;Q5T9A4-3;Q5T9A4;J3QSF3;Q5T9A4-2	H0Y2W2;Q9NVI7-2;Q9NVI7;Q9NVI7-3;Q5T2N8;Q5T9A4-3;Q5T9A4	4;4;4;3;2;2;2;1;1	4;4;4;3;2;2;2;1;1	4;4;4;3;2;2;2;1;1	ATPase family AAA domain-containing protein 3A;ATPase family AAA domain-containing protein 3C;ATPase family AAA domain-containing protein 3B	ATAD3A;ATAD3C;ATAD3B	ATPase family AAA domain-containing protein 3A (Fragment);Isoform 2 of ATPase family AAA domain-containing protein 3A;ATPase family AAA domain-containing protein 3A;Isoform 3 of ATPase family AAA domain-containing protein 3A;ATPase family AAA domain-contai	9	4	4	4	2	1	3	2	2	2	2	1	3	2	2	2	2	1	3	2	2	2	10.5	10.5	10.5	64.243	572	572;586;634;507;411;602;648;131;166	0	9.4651	5.6	1.9	7	5.6	5.6	7.2	49862000	13437000	0	16037000	8168900	8123800
Q5QPJ9;Q5QPK2;H0Y368;O60762	Q5QPJ9;Q5QPK2;H0Y368;O60762	2;2;2;2	2;2;2;2	2;2;2;2	Dolichol-phosphate mannosyltransferase subunit 1	DPM1	Dolichol-phosphate mannosyltransferase subunit 1 (Fragment);Dolichol-phosphate mannosyltransferase subunit 1;Dolichol-phosphate mannosyltransferase subunit 1 (Fragment);Dolichol-phosphate mannosyltransferase subunit 1	4	2	2	2	0	0	0	1	0	1	0	0	0	1	0	1	0	0	0	1	0	1	14.9	14.9	14.9	25.106	221	221;287;295;260	0.00071225	6.209	0	0	0	10	0	5	5627300	0	0	0	3450900	0
H0Y390;H3BPE1;H3BQK9;Q9UPN3-4;Q9UPN3-3;Q9UPN3-2;Q9UPN3-5;Q9UPN3	H0Y390;H3BPE1;H3BQK9;Q9UPN3-4;Q9UPN3-3;Q9UPN3-2;Q9UPN3-5;Q9UPN3	1;1;1;1;1;1;1;1	1;1;1;1;1;1;1;1	1;1;1;1;1;1;1;1	Microtubule-actin cross-linking factor 1, isoforms 1/2/3/5	MACF1	Microtubule-actin cross-linking factor 1, isoforms 1/2/3/5 (Fragment);Microtubule-actin cross-linking factor 1, isoforms 1/2/3/5;Microtubule-actin cross-linking factor 1, isoforms 1/2/3/5;Isoform 5 of Microtubule-actin cross-linking factor 1, isoforms 1/2/	8	1	1	1	1	0	0	0	0	0	1	0	0	0	0	0	1	0	0	0	0	0	0.4	0.4	0.4	505.64	4434	4434;7555;7592;5300;5374;5430;5938;7388	0.0080137	2.6011	0.4	0	0	0	0	0	0	0	0	0	0	0
H0Y5B4;H7BZ11;J3KQN4;Q969Q0;P83881	H0Y5B4;H7BZ11;J3KQN4;Q969Q0;P83881	1;1;1;1;1	1;1;1;1;1	1;1;1;1;1	60S ribosomal protein L36a-like;60S ribosomal protein L36a	RPL36A;RPL36A-HNRNPH2;RPL36AL	60S ribosomal protein L36a;RPL36A-HNRNPH2 readthrough;60S ribosomal protein L36a;60S ribosomal protein L36a-like;60S ribosomal protein L36a	5	1	1	1	1	1	1	1	1	1	1	1	1	1	1	1	1	1	1	1	1	1	8	8	8	13.228	112	112;118;142;106;106	0.00070621	5.9738	8	8	8	8	8	8	53449000	7513800	12612000	0	11617000	3460600
H0Y711;Q9BQA1	H0Y711;Q9BQA1	3;3	3;3	3;3	Methylosome protein 50	WDR77	Methylosome protein 50 (Fragment);Methylosome protein 50	2	3	3	3	2	0	3	1	0	1	2	0	3	1	0	1	2	0	3	1	0	1	18.2	18.2	18.2	30.987	291	291;342	0.00078003	8.233	13.1	0	18.2	5.2	0	5.2	29235000	5665700	0	16143000	5684100	0
P0DP25;P0DP24;P0DP23;H0Y7A7;E7ETZ0;E7EMB3;Q96HY3;G3V361;G3V226;M0QZ52;F8WBR5;G3V479;P27482;C9J7T9;P02585	P0DP25;P0DP24;P0DP23;H0Y7A7;E7ETZ0;E7EMB3;Q96HY3;G3V361	11;11;11;11;10;10;7;6;5;5;4;4;2;1;1	11;11;11;11;10;10;7;6;5;5;4;4;2;1;1	11;11;11;11;10;10;7;6;5;5;4;4;2;1;1		CALM2;CALM1	Calmodulin-3;Calmodulin-2;Calmodulin-1;Calmodulin-2 (Fragment);Calmodulin-1;Calmodulin-2;CALM1 protein;Calmodulin-1 (Fragment)	15	11	11	11	10	10	8	9	10	9	10	10	8	9	10	9	10	10	8	9	10	9	85.2	85.2	85.2	16.837	149	149;149;149;187;150;196;113;98;76;83;65;83;149;145;160	0	295.5	60.4	60.4	55.7	60.4	60.4	76.5	1961100000	446720000	220850000	373270000	319500000	306120000
H0Y8E6;P49736	H0Y8E6;P49736	4;4	4;4	4;4	DNA replication licensing factor MCM2	MCM2	DNA helicase (Fragment);DNA replication licensing factor MCM2	2	4	4	4	1	2	4	0	1	1	1	2	4	0	1	1	1	2	4	0	1	1	7.1	7.1	7.1	93.998	836	836;904	0	14.337	1.3	2.8	7.1	0	1.3	1.3	14067000	0	1717300	6118500	0	4181400
H0Y9C7;P20933	H0Y9C7;P20933	1;1	1;1	1;1	N(4)-(beta-N-acetylglucosaminyl)-L-asparaginase;Glycosylasparaginase alpha chain;Glycosylasparaginase beta chain	AGA	N(4)-(beta-N-acetylglucosaminyl)-L-asparaginase (Fragment);N(4)-(beta-N-acetylglucosaminyl)-L-asparaginase	2	1	1	1	0	0	0	1	0	0	0	0	0	1	0	0	0	0	0	1	0	0	7.1	7.1	7.1	16.958	154	154;346	0.0080692	2.6399	0	0	0	7.1	0	0	1893400	0	0	0	1893400	0
H0YBL1;P29218;P29218-3;E5RIP7;E5RG94;E5RHE9;E5RG13;E5RI82;E5RGY4;P29218-2	H0YBL1;P29218;P29218-3;E5RIP7	3;3;3;2;1;1;1;1;1;1	3;3;3;2;1;1;1;1;1;1	3;3;3;2;1;1;1;1;1;1	Inositol monophosphatase 1	IMPA1	Inositol-1-monophosphatase (Fragment);Inositol monophosphatase 1;Isoform 3 of Inositol monophosphatase 1;Inositol-1-monophosphatase (Fragment)	10	3	3	3	1	0	3	1	2	1	1	0	3	1	2	1	1	0	3	1	2	1	16.6	16.6	16.6	28.529	265	265;277;336;180;101;126;153;174;211;198	0.00067024	4.8869	8.7	0	16.6	8.7	12.5	3.8	21875000	3438400	0	6173300	4504500	7758700
H0YCK3;P55265-5;P55265-3;P55265-2;P55265;P55265-4	H0YCK3;P55265-5;P55265-3;P55265-2;P55265;P55265-4	2;2;2;2;2;2	2;2;2;2;2;2	2;2;2;2;2;2	Double-stranded RNA-specific adenosine deaminase	ADAR	Double-stranded RNA-specific adenosine deaminase (Fragment);Isoform 5 of Double-stranded RNA-specific adenosine deaminase;Isoform 3 of Double-stranded RNA-specific adenosine deaminase;Isoform 2 of Double-stranded RNA-specific adenosine deaminase;Double-str	6	2	2	2	0	0	0	2	0	1	0	0	0	2	0	1	0	0	0	2	0	1	2.5	2.5	2.5	132.65	1195	1195;931;1181;1200;1226;1269	0.0036408	3.2879	0	0	0	2.5	0	1	3415400	0	0	0	3415400	0
H0YCU9;Q01995	H0YCU9;Q01995	1;1	1;1	1;1	Transgelin	TAGLN	Transgelin (Fragment);Transgelin	2	1	1	1	0	0	0	0	1	0	0	0	0	0	1	0	0	0	0	0	1	0	8.6	8.6	8.6	16.733	151	151;201	0.0079818	2.5696	0	0	0	0	8.6	0	0	0	0	0	0	0
H0YDU8;P53041;A8MU39	H0YDU8;P53041;A8MU39	2;2;1	2;2;1	2;2;1	Serine/threonine-protein phosphatase;Serine/threonine-protein phosphatase 5	PPP5C	Serine/threonine-protein phosphatase (Fragment);Serine/threonine-protein phosphatase 5;Serine/threonine-protein phosphatase	3	2	2	2	0	0	0	2	1	1	0	0	0	2	1	1	0	0	0	2	1	1	4.9	4.9	4.9	55.096	485	485;499;371	0.00062461	3.8106	0	0	0	4.9	2.7	2.7	2944900	0	0	0	2138400	0
H0YE90;E9PLH9;E9PP14;A0A0J9YX13;E9PKL9;Q13630	H0YE90;E9PLH9;E9PP14;A0A0J9YX13;E9PKL9;Q13630	2;1;1;1;1;1	2;1;1;1;1;1	2;1;1;1;1;1	GDP-L-fucose synthase	TSTA3	GDP-L-fucose synthase (Fragment);GDP-L-fucose synthase (Fragment);GDP-L-fucose synthase (Fragment);GDP-L-fucose synthase (Fragment);GDP-L-fucose synthase (Fragment);GDP-L-fucose synthase	6	2	2	2	0	0	2	0	0	0	0	0	2	0	0	0	0	0	2	0	0	0	42.4	42.4	42.4	3.9655	33	33;118;198;221;268;321	0.0090447	2.4749	0	0	42.4	0	0	0	10289000	0	0	10289000	0	0
H0YF61;P22307-6;P22307-2;P22307-4;P22307-7;P22307-8;P22307	H0YF61;P22307-6;P22307-2;P22307-4;P22307-7;P22307-8;P22307	4;4;4;4;4;4;4	4;4;4;4;4;4;4	4;4;4;4;4;4;4	Non-specific lipid-transfer protein	SCP2	Non-specific lipid-transfer protein (Fragment);Isoform 6 of Non-specific lipid-transfer protein;Isoform SCP2 of Non-specific lipid-transfer protein;Isoform 4 of Non-specific lipid-transfer protein;Isoform 7 of Non-specific lipid-transfer protein;Isoform 8	7	4	4	4	2	0	1	3	4	4	2	0	1	3	4	4	2	0	1	3	4	4	27.9	27.9	27.9	14.874	140	140;140;143;466;503;523;547	0	27.507	19.3	0	5.7	27.1	27.9	27.9	85637000	8013800	0	1257700	20814000	22245000
H0YGJ7;O75822-3;O75822	H0YGJ7;O75822-3;O75822	1;1;1	1;1;1	1;1;1	Eukaryotic translation initiation factor 3 subunit J	EIF3J	Eukaryotic translation initiation factor 3 subunit J (Fragment);Isoform 3 of Eukaryotic translation initiation factor 3 subunit J;Eukaryotic translation initiation factor 3 subunit J	3	1	1	1	1	0	1	0	0	1	1	0	1	0	0	1	1	0	1	0	0	1	18.9	18.9	18.9	11.959	106	106;209;258	0.00068918	5.505	18.9	0	18.9	0	0	18.9	5190700	0	0	5190700	0	0
H0YGW7;Q8NE71-2;Q8NE71;A0A0G2JIC2	H0YGW7;Q8NE71-2;Q8NE71	6;6;6;2	6;6;6;2	6;6;6;2	ATP-binding cassette sub-family F member 1	ABCF1	ATP-binding cassette sub-family F member 1 (Fragment);Isoform 2 of ATP-binding cassette sub-family F member 1;ATP-binding cassette sub-family F member 1	4	6	6	6	0	0	0	1	3	3	0	0	0	1	3	3	0	0	0	1	3	3	15.6	15.6	15.6	67.55	596	596;807;845;238	0	14.15	0	0	0	2.5	6.5	9.1	15612000	0	0	0	0	0
H0YHI8;O14974-5;O14974-2;O14974	H0YHI8;O14974-5;O14974-2;O14974	1;1;1;1	1;1;1;1	1;1;1;1	Protein phosphatase 1 regulatory subunit 12A	PPP1R12A	Protein phosphatase 1 regulatory subunit 12A (Fragment);Isoform 5 of Protein phosphatase 1 regulatory subunit 12A;Isoform 2 of Protein phosphatase 1 regulatory subunit 12A;Protein phosphatase 1 regulatory subunit 12A	4	1	1	1	0	0	1	0	0	0	0	0	1	0	0	0	0	0	1	0	0	0	4.6	4.6	4.6	40.504	367	367;943;995;1030	0	29.002	0	0	4.6	0	0	0	4157300	0	0	4157300	0	0
H0YK42;Q13596-2;Q13596;Q13596-3	H0YK42;Q13596-2;Q13596;Q13596-3	4;4;4;3	4;4;4;3	2;2;2;2	Sorting nexin-1	SNX1	Sorting nexin-1;Isoform 1A of Sorting nexin-1;Sorting nexin-1;Isoform 3 of Sorting nexin-1	4	4	4	2	2	1	0	3	2	4	2	1	0	3	2	4	0	0	0	1	1	2	15.5	15.5	8.6	35.592	304	304;457;522;557	0	11.173	6.9	3.6	0	12.2	8.9	15.5	44506000	10353000	1821600	0	7618400	5412700
H0YLP6;H0YMF4;H0YKD8;P46779-4;P46779-5;P46779;P46779-2;P46779-3	H0YLP6;H0YMF4;H0YKD8;P46779-4;P46779-5;P46779;P46779-2;P46779-3	4;4;4;4;4;4;4;4	4;4;4;4;4;4;4;4	4;4;4;4;4;4;4;4	60S ribosomal protein L28	RPL28	60S ribosomal protein L28;60S ribosomal protein L28;60S ribosomal protein L28;Isoform 4 of 60S ribosomal protein L28;Isoform 5 of 60S ribosomal protein L28;60S ribosomal protein L28;Isoform 2 of 60S ribosomal protein L28;Isoform 3 of 60S ribosomal protein	8	4	4	4	2	3	4	4	3	4	2	3	4	4	3	4	2	3	4	4	3	4	44.9	44.9	44.9	9.657	89	89;112;170;69;87;137;163;169	0	13.276	23.6	32.6	44.9	44.9	32.6	44.9	189850000	6802000	9944700	47863000	33447000	29304000
H0YKT4;H0YNG3;P67812-4;P67812;P67812-3	H0YKT4;H0YNG3;P67812-4;P67812;P67812-3	1;1;1;1;1	1;1;1;1;1	1;1;1;1;1	Signal peptidase complex catalytic subunit SEC11;Signal peptidase complex catalytic subunit SEC11A	SEC11A	Signal peptidase complex catalytic subunit SEC11A;Signal peptidase complex catalytic subunit SEC11;Isoform 4 of Signal peptidase complex catalytic subunit SEC11A;Signal peptidase complex catalytic subunit SEC11A;Isoform 3 of Signal peptidase complex cataly	5	1	1	1	1	1	0	0	0	0	1	1	0	0	0	0	1	1	0	0	0	0	8.5	8.5	8.5	14.892	129	129;163;164;179;185	0.0036342	3.2565	8.5	8.5	0	0	0	0	1466100	0	1466100	0	0	0
H0YLW7;H0YMW8;H0YNF3;H0YMR6;H0YLE6;H0YL55;H7BXE3;Q9NWH9	H0YLW7;H0YMW8;H0YNF3;H0YMR6;H0YLE6;H0YL55;H7BXE3;Q9NWH9	1;1;1;1;1;1;1;1	1;1;1;1;1;1;1;1	1;1;1;1;1;1;1;1	SAFB-like transcription modulator	SLTM	SAFB-like transcription modulator;SAFB-like transcription modulator;SAFB-like transcription modulator (Fragment);SAFB-like transcription modulator;SAFB-like transcription modulator (Fragment);SAFB-like transcription modulator (Fragment);SAFB-like transcrip	8	1	1	1	0	0	1	0	0	1	0	0	1	0	0	1	0	0	1	0	0	1	30.6	30.6	30.6	6.6127	62	62;89;161;177;192;229;453;1034	0.00066534	4.7941	0	0	30.6	0	0	30.6	1984200	0	0	1984200	0	0
H0YMU3;H0YL72;P50213;H0YKD0;H0YLI6;P50213-2;H0YM64	H0YMU3;H0YL72;P50213;H0YKD0;H0YLI6;P50213-2	3;3;3;2;2;2;1	3;3;3;2;2;2;1	3;3;3;2;2;2;1	Isocitrate dehydrogenase [NAD] subunit alpha, mitochondrial	IDH3A	Isocitrate dehydrogenase [NAD] subunit alpha, mitochondrial (Fragment);Isocitrate dehydrogenase [NAD] subunit alpha, mitochondrial;Isocitrate dehydrogenase [NAD] subunit alpha, mitochondrial;Isocitrate dehydrogenase [NAD] subunit alpha, mitochondrial (Frag	7	3	3	3	2	1	2	1	2	1	2	1	2	1	2	1	2	1	2	1	2	1	17.1	17.1	17.1	19.247	175	175;331;366;109;134;288;46	0.00078555	8.3975	12.6	6.9	12.6	6.9	11.4	6.9	24153000	8397200	0	7115700	1367000	3591400
H0YLA2;P37108	H0YLA2;P37108	3;3	3;3	3;3	Signal recognition particle 14 kDa protein	SRP14	Signal recognition particle 14 kDa protein;Signal recognition particle 14 kDa protein	2	3	3	3	1	1	1	2	2	1	1	1	1	2	2	1	1	1	1	2	2	1	30.4	30.4	30.4	13.058	115	115;136	0	24.184	12.2	12.2	11.3	19.1	23.5	11.3	52586000	7323200	6085600	0	12818000	13208000
H0YMB1;Q96TC7-2;Q96TC7	H0YMB1;Q96TC7-2;Q96TC7	1;1;1	1;1;1	1;1;1	Regulator of microtubule dynamics protein 3	RMDN3	Regulator of microtubule dynamics protein 3 (Fragment);Isoform 2 of Regulator of microtubule dynamics protein 3;Regulator of microtubule dynamics protein 3	3	1	1	1	0	0	1	0	0	0	0	0	1	0	0	0	0	0	1	0	0	0	7.5	7.5	7.5	34.038	306	306;341;470	0.00071891	6.3641	0	0	7.5	0	0	0	2470400	0	0	2470400	0	0
Q5SZE1;H0YNU7;Q96G23;Q5SZE2;Q5SZE3;H0YKH6;H0YLQ6;Q5SZE4	Q5SZE1;H0YNU7;Q96G23;Q5SZE2;Q5SZE3;H0YKH6;H0YLQ6;Q5SZE4	2;2;2;1;1;1;1;1	2;2;2;1;1;1;1;1	2;2;2;1;1;1;1;1	Ceramide synthase 2	CERS2	Ceramide synthase 2 (Fragment);Ceramide synthase 2;Ceramide synthase 2;Ceramide synthase 2 (Fragment);Ceramide synthase 2 (Fragment);Ceramide synthase 2 (Fragment);Ceramide synthase 2 (Fragment);Ceramide synthase 2 (Fragment)	8	2	2	2	0	0	0	1	1	1	0	0	0	1	1	1	0	0	0	1	1	1	7.9	7.9	7.9	36.373	304	304;377;380;128;192;222;228;249	0.00066934	4.8515	0	0	0	5.3	5.3	2.6	13977000	0	0	0	6759400	5906700
H3BLU7;O43488;Q8NHP1	H3BLU7;O43488	4;4;1	4;4;1	4;4;1	Aflatoxin B1 aldehyde reductase member 2	AKR7A2	Aflatoxin B1 aldehyde reductase member 2 (Fragment);Aflatoxin B1 aldehyde reductase member 2	3	4	4	4	4	3	3	1	2	2	4	3	3	1	2	2	4	3	3	1	2	2	18.5	18.5	18.5	34.684	314	314;359;331	0	19.571	18.5	14.6	14.6	6.1	9.9	9.9	58304000	14899000	5582200	16884000	1579800	12633000
H3BM21;P05106-2;P05106-3;P05106;I3L4X8	H3BM21;P05106-2;P05106-3;P05106;I3L4X8	2;2;2;2;1	2;2;2;2;1	2;2;2;2;1	Integrin beta;Integrin beta-3	ITGB3	Integrin beta (Fragment);Isoform Beta-3B of Integrin beta-3;Isoform Beta-3C of Integrin beta-3;Integrin beta-3;Integrin beta	5	2	2	2	0	1	1	0	0	0	0	1	1	0	0	0	0	1	1	0	0	0	3.4	3.4	3.4	86.869	787	787;780;784;788;443	0.0069767	2.7233	0	1.4	2	0	0	0	928230	0	0	928230	0	0
H3BPG5;H3BV80;H3BMM9;H3BTC0;Q15287-3;Q15287-2;Q15287;H3BMS0	H3BPG5;H3BV80;H3BMM9;H3BTC0;Q15287-3;Q15287-2;Q15287;H3BMS0	2;2;2;2;2;2;2;1	2;2;2;2;2;2;2;1	2;2;2;2;2;2;2;1	RNA-binding protein with serine-rich domain 1	RNPS1	RNA binding protein S1, serine-rich domain, isoform CRA_c;RNA-binding protein with serine-rich domain 1;RNA-binding protein with serine-rich domain 1 (Fragment);RNA-binding protein with serine-rich domain 1 (Fragment);Isoform 3 of RNA-binding protein with	8	2	2	2	2	1	1	1	1	0	2	1	1	1	1	0	2	1	1	1	1	0	32.8	32.8	32.8	15.108	128	128;211;284;302;268;282;305;257	0	14.977	32.8	21.1	11.7	21.1	21.1	0	36607000	13551000	10564000	6795600	3003400	2692300
H3BN98;I3L3P7;I3L246;H3BV27;H3BT37;I3L303;H3BTX6;H3BS91;H3BPJ2;Q15041-3;Q15041	H3BN98;I3L3P7;I3L246	4;3;3;1;1;1;1;1;1;1;1	1;0;0;0;0;0;1;1;1;1;1	1;0;0;0;0;0;1;1;1;1;1		RPS15A	Uncharacterized protein (Fragment);40S ribosomal protein S15a;40S ribosomal protein S15a	11	4	1	1	4	3	4	3	4	4	1	1	1	0	1	1	1	1	1	0	1	1	24.9	11.8	11.8	27.168	237	237;100;111;49;50;52;88;99;101;151;203	0	18.248	24.9	21.5	24.9	13.1	24.9	24.9	30171000	5979900	5119400	7782800	0	5752500
H3BNK3;O14561	H3BNK3;O14561	2;2	2;2	2;2	Acyl carrier protein;Acyl carrier protein, mitochondrial	NDUFAB1	Acyl carrier protein (Fragment);Acyl carrier protein, mitochondrial	2	2	2	2	2	0	2	2	2	1	2	0	2	2	2	1	2	0	2	2	2	1	13.5	13.5	13.5	12.099	111	111;156	0	10.325	13.5	0	13.5	13.5	13.5	12.6	79616000	14243000	0	11722000	25454000	20468000
H3BNX8;P20674;H3BRM5;H3BV69	H3BNX8;P20674;H3BRM5;H3BV69	3;3;2;2	3;3;2;2	3;3;2;2	Cytochrome c oxidase subunit 5A, mitochondrial	COX5A	Cytochrome c oxidase subunit 5A, mitochondrial;Cytochrome c oxidase subunit 5A, mitochondrial;Cytochrome c oxidase subunit 5A, mitochondrial;Cytochrome c oxidase subunit 5A, mitochondrial	4	3	3	3	0	1	0	2	3	1	0	1	0	2	3	1	0	1	0	2	3	1	20.3	20.3	20.3	17.235	153	153;150;69;111	0.00074019	7.0802	0	9.8	0	15.7	20.3	4.6	26808000	0	1389700	0	10409000	10630000
H3BPB8;P34949-2;P34949;F5GX71;H3BPU7;H3BPM5;H3BT46;H3BMZ9;H3BPP3;H3BP57;H3BT48;H3BUZ9;H3BUG1;H3BU66;H3BN01;H3BQX0;H3BNY8;B4DYB8	H3BPB8;P34949-2;P34949;F5GX71;H3BPU7;H3BPM5;H3BT46;H3BMZ9;H3BPP3;H3BP57;H3BT48;H3BUZ9	4;4;4;3;2;2;2;2;2;2;2;2;1;1;1;1;1;1	4;4;4;3;2;2;2;2;2;2;2;2;1;1;1;1;1;1	4;4;4;3;2;2;2;2;2;2;2;2;1;1;1;1;1;1	Mannose-6-phosphate isomerase	MPI	Mannose-6-phosphate isomerase;Isoform 2 of Mannose-6-phosphate isomerase;Mannose-6-phosphate isomerase;Mannose-6-phosphate isomerase;Mannose-6-phosphate isomerase (Fragment);Mannose-6-phosphate isomerase (Fragment);Mannose-6-phosphate isomerase (Fragment);	18	4	4	4	1	1	1	3	2	4	1	1	1	3	2	4	1	1	1	3	2	4	18.1	18.1	18.1	44.45	403	403;362;423;373;119;173;213;264;287;288;319;339;125;168;174;175;185;228	0	20.345	6.7	6.7	6.7	15.4	9.4	18.1	61812000	11068000	5521000	8271100	14469000	9623100
H3BPH4;H3BV55;O15305-2;O15305	H3BPH4;H3BV55;O15305-2;O15305	1;1;1;1	1;1;1;1	1;1;1;1	Phosphomannomutase;Phosphomannomutase 2	PMM2	Phosphomannomutase (Fragment);Phosphomannomutase;Isoform 2 of Phosphomannomutase 2;Phosphomannomutase 2	4	1	1	1	0	0	0	1	1	1	0	0	0	1	1	1	0	0	0	1	1	1	8.5	8.5	8.5	16.223	142	142;219;119;246	0.0058754	2.8369	0	0	0	8.5	8.5	8.5	5472900	0	0	0	2193100	0
H3BPJ9;O96000;H3BV16;O96000-2	H3BPJ9;O96000;H3BV16;O96000-2	2;2;1;1	2;2;1;1	2;2;1;1	NADH dehydrogenase [ubiquinone] 1 beta subcomplex subunit 10	NDUFB10	NADH dehydrogenase [ubiquinone] 1 beta subcomplex subunit 10;NADH dehydrogenase [ubiquinone] 1 beta subcomplex subunit 10;NADH dehydrogenase [ubiquinone] 1 beta subcomplex subunit 10 (Fragment);Isoform 2 of NADH dehydrogenase [ubiquinone] 1 beta subcomplex	4	2	2	2	1	0	0	1	2	1	1	0	0	1	2	1	1	0	0	1	2	1	15.5	15.5	15.5	19.258	161	161;172;142;168	0.00069735	5.7103	8.7	0	0	8.7	15.5	8.7	17497000	1939600	0	0	4248300	5861800
H3BPK3;H3BPQ4;Q16775-2;Q16775	H3BPK3;H3BPQ4;Q16775-2;Q16775	1;1;1;1	1;1;1;1	1;1;1;1	Hydroxyacylglutathione hydrolase, mitochondrial	HAGH	Hydroxyacylglutathione hydrolase, mitochondrial (Fragment);Hydroxyacylglutathione hydrolase, mitochondrial;Isoform 2 of Hydroxyacylglutathione hydrolase, mitochondrial;Hydroxyacylglutathione hydrolase, mitochondrial	4	1	1	1	0	1	0	1	1	1	0	1	0	1	1	1	0	1	0	1	1	1	4.2	4.2	4.2	26.305	239	239;258;260;308	0.0041568	2.9902	0	4.2	0	4.2	4.2	4.2	13887000	0	0	0	6065500	4641000
H3BRL8;H3BPZ1;H3BS72;Q9P035-2;Q9P035;H3BMZ1	H3BRL8;H3BPZ1;H3BS72;Q9P035-2;Q9P035;H3BMZ1	2;2;2;2;2;1	2;2;2;2;2;1	2;2;2;2;2;1	Very-long-chain (3R)-3-hydroxyacyl-CoA dehydratase 3	HACD3	Very-long-chain (3R)-3-hydroxyacyl-CoA dehydratase;Very-long-chain (3R)-3-hydroxyacyl-CoA dehydratase;Very-long-chain (3R)-3-hydroxyacyl-CoA dehydratase;Isoform 2 of Very-long-chain (3R)-3-hydroxyacyl-CoA dehydratase 3;Very-long-chain (3R)-3-hydroxyacyl-Co	6	2	2	2	2	2	2	2	2	1	2	2	2	2	2	1	2	2	2	2	2	1	9.8	9.8	9.8	29.205	245	245;337;400;307;362;139	0.00076278	7.7483	9.8	9.8	9.8	9.8	9.8	5.7	35773000	7431600	4009800	4354300	5925300	9023900
H3BR29;H3BSM7;Q96GQ5;Q96GQ5-2	H3BR29;H3BSM7;Q96GQ5;Q96GQ5-2	2;2;2;1	2;2;2;1	2;2;2;1	RUS1 family protein C16orf58	C16orf58	RUS1 family protein C16orf58;RUS1 family protein C16orf58;RUS1 family protein C16orf58;Isoform 2 of RUS1 family protein C16orf58	4	2	2	2	0	0	0	1	1	1	0	0	0	1	1	1	0	0	0	1	1	1	8	8	8	46.342	423	423;466;468;206	0.00067295	5.0455	0	0	0	5.2	2.8	2.8	7258100	0	0	0	3455300	1092100
H3BRY5;P50225;H3BQX5;P50226;E9PKR8;E9PM76;E9PKW4;A0A0A6YYL2;P0DMN0;P0DMM9;P0DMM9-3;H3BNY7;H3BPL6;P0DMM9-2;P50225-2	H3BRY5;P50225;H3BQX5;P50226;E9PKR8	5;5;4;4;3;2;2;2;2;2;2;1;1;1;1	5;5;4;4;3;2;2;2;2;2;2;1;1;1;1	5;5;4;4;3;2;2;2;2;2;2;1;1;1;1	Sulfotransferase;Sulfotransferase 1A1;Sulfotransferase 1A2	SULT1A1;SULT1A2	Sulfotransferase (Fragment);Sulfotransferase 1A1;Sulfotransferase (Fragment);Sulfotransferase 1A2;Sulfotransferase (Fragment)	15	5	5	5	0	0	0	5	5	4	0	0	0	5	5	4	0	0	0	5	5	4	27.8	27.8	27.8	32.625	281	281;295;169;295;192;221;262;301;295;295;301;87;135;197;217	0	19.178	0	0	0	27.8	27.8	22.1	47584000	0	0	0	15075000	16265000
H3BT57;P29590-14;P29590-10;P29590-4;P29590-12;P29590-2;P29590-5;P29590-9;P29590-13;P29590-3;P29590-8;P29590-11;P29590	H3BT57;P29590-14;P29590-10;P29590-4;P29590-12;P29590-2;P29590-5;P29590-9;P29590-13;P29590-3;P29590-8;P29590-11;P29590	2;2;2;2;2;2;2;2;2;2;2;2;2	2;2;2;2;2;2;2;2;2;2;2;2;2	2;2;2;2;2;2;2;2;2;2;2;2;2	Protein PML	PML	Protein PML;Isoform PML-14 of Protein PML;Isoform PML-7 of Protein PML;Isoform PML-6 of Protein PML;Isoform PML-12 of Protein PML;Isoform PML-5 of Protein PML;Isoform PML-4 of Protein PML;Isoform PML-3 of Protein PML;Isoform PML-13 of Protein PML;Isoform P	13	2	2	2	1	0	1	1	2	1	1	0	1	1	2	1	1	0	1	1	2	1	4	4	4	62.913	568	568;423;435;560;585;611;633;641;781;824;829;834;882	0.00068681	5.4127	2.1	0	2.1	2.1	4	2.1	8401200	3670800	0	0	2411200	2319300
H3BUM9;K7ENL8;K7ES68;K7EQY5;P41240;P42679-3;P42679;P42679-2	H3BUM9;K7ENL8;K7ES68;K7EQY5;P41240;P42679-3;P42679;P42679-2	1;1;1;1;1;1;1;1	1;1;1;1;1;1;1;1	1;1;1;1;1;1;1;1	Non-specific protein-tyrosine kinase;Tyrosine-protein kinase CSK;Megakaryocyte-associated tyrosine-protein kinase	CSK;MATK	Tyrosine-protein kinase CSK (Fragment);Megakaryocyte-associated tyrosine-protein kinase (Fragment);Tyrosine-protein kinase (Fragment);Tyrosine-protein kinase;Tyrosine-protein kinase CSK;Isoform 3 of Megakaryocyte-associated tyrosine-protein kinase;Megakary	8	1	1	1	0	0	0	0	1	1	0	0	0	0	1	1	0	0	0	0	1	1	9.1	9.1	9.1	12.31	110	110;174;267;506;450;466;507;508	0.0069727	2.7221	0	0	0	0	9.1	9.1	697410	0	0	0	0	0
J3QLT7;H3BUP2;H3BUN4;O60936;O60936-3;H3BM67	J3QLT7;H3BUP2;H3BUN4;O60936;O60936-3;H3BM67	2;2;2;2;2;1	2;2;2;2;2;1	2;2;2;2;2;1	Nucleolar protein 3	NOL3	Nucleolar protein 3 (Fragment);Nucleolar protein 3 (Fragment);Nucleolar protein 3 (Fragment);Nucleolar protein 3;Isoform 3 of Nucleolar protein 3;Nucleolar protein 3 (Fragment)	6	2	2	2	2	0	1	0	1	1	2	0	1	0	1	1	2	0	1	0	1	1	45.8	45.8	45.8	13.91	131	131;174;206;208;270;138	0.00070274	5.8753	45.8	0	19.8	0	19.8	19.8	13350000	4851900	0	2580600	0	3702300
H3BVG0;Q8N1F7;Q8N1F7-2;H3BV11;H3BRI8;H3BM93;H3BV15;H3BRD9;H3BPA9	H3BVG0;Q8N1F7;Q8N1F7-2	5;5;3;2;2;2;1;1;1	5;5;3;2;2;2;1;1;1	5;5;3;2;2;2;1;1;1	Nuclear pore complex protein Nup93	NUP93	Nuclear pore complex protein Nup93;Nuclear pore complex protein Nup93;Isoform 2 of Nuclear pore complex protein Nup93	9	5	5	5	1	0	1	3	2	3	1	0	1	3	2	3	1	0	1	3	2	3	10.2	10.2	10.2	99.554	880	880;819;696;136;151;178;84;140;229	0	41.074	1.4	0	1.2	7	4.9	6.8	17587000	2580600	0	0	3673000	3504200
H7BYY1;F5H7S3;B7Z596;H0YK48;P09493-5;H0YN06	H7BYY1;F5H7S3;B7Z596;H0YK48;P09493-5	9;7;7;6;6;1	1;1;1;1;1;1	1;1;1;1;1;1	Tropomyosin alpha-1 chain	TPM1	Tropomyosin 1 (Alpha), isoform CRA_m;Tropomyosin alpha-1 chain;Tropomyosin alpha-1 chain;Tropomyosin alpha-1 chain;Isoform 5 of Tropomyosin alpha-1 chain	6	9	1	1	4	3	4	6	7	8	1	0	0	0	0	1	1	0	0	0	0	1	32.3	4.8	4.8	28.747	248	248;245;275;248;245;49	0.0090039	2.4471	13.3	8.9	16.1	20.2	23.8	28.6	0	0	0	0	0	0
H7BZE2;Q15654	H7BZE2;Q15654	2;2	2;2	2;2	Thyroid receptor-interacting protein 6	TRIP6	Thyroid receptor-interacting protein 6 (Fragment);Thyroid receptor-interacting protein 6	2	2	2	2	0	0	2	0	0	1	0	0	2	0	0	1	0	0	2	0	0	1	26	26	26	23.04	215	215;476	0.00073964	7.0776	0	0	26	0	0	16.7	8862900	0	0	6776700	0	0
H7BZJ3	H7BZJ3	5	1	1		PDIA3	Protein disulfide-isomerase A3 (Fragment)	1	5	1	1	5	5	5	5	5	5	1	1	1	1	1	1	1	1	1	1	1	1	43.9	11.4	11.4	13.519	123	123	0	49.971	43.9	43.9	43.9	43.9	43.9	43.9	141930000	30347000	17092000	30449000	21274000	23329000
U3KPY7;H7BZW6;X6RAL5;O00422	U3KPY7;H7BZW6;X6RAL5;O00422	1;1;1;1	1;1;1;1	1;1;1;1	Histone deacetylase complex subunit SAP18	SAP18	Histone deacetylase complex subunit SAP18 (Fragment);Histone deacetylase complex subunit SAP18 (Fragment);Histone deacetylase complex subunit SAP18;Histone deacetylase complex subunit SAP18	4	1	1	1	0	0	0	1	1	0	0	0	0	1	1	0	0	0	0	1	1	0	17.9	17.9	17.9	9.1163	78	78;143;172;153	0.0095398	2.4252	0	0	0	17.9	17.9	0	5925300	0	0	0	1855200	4070000
H7C0X7;Q9NZL9-4;Q9NZL9-2;Q9NZL9;Q9NZL9-3	H7C0X7;Q9NZL9-4;Q9NZL9-2;Q9NZL9;Q9NZL9-3	4;4;4;4;3	4;4;4;4;3	4;4;4;4;3	Methionine adenosyltransferase 2 subunit beta	MAT2B	Methionine adenosyltransferase 2 subunit beta (Fragment);Isoform 4 of Methionine adenosyltransferase 2 subunit beta;Isoform 2 of Methionine adenosyltransferase 2 subunit beta;Methionine adenosyltransferase 2 subunit beta;Isoform 3 of Methionine adenosyltra	5	4	4	4	0	0	1	1	2	3	0	0	1	1	2	3	0	0	1	1	2	3	30.8	30.8	30.8	22.063	198	198;306;323;334;259	0.00075815	7.6746	0	0	5.1	6.6	19.2	25.8	24402000	0	0	1398300	1492200	8741700
H7C1N3;O15155;C9JTT8;Q68DU7;O15155-2	H7C1N3;O15155;C9JTT8;Q68DU7;O15155-2	2;2;1;1;1	2;2;1;1;1	2;2;1;1;1	BET1 homolog	BET1;DKFZp781C0425	BET1 homolog (Fragment);BET1 homolog;BET1 homolog;BET1 homolog;Isoform 2 of BET1 homolog	5	2	2	2	1	0	1	1	1	2	1	0	1	1	1	2	1	0	1	1	1	2	21.8	21.8	21.8	14.872	133	133;118;98;127;83	0.00072464	6.6206	8.3	0	8.3	8.3	8.3	21.8	25813000	1635800	0	1264300	2652200	7237100
H7C2S4	H7C2S4	1	1	1		CTDSPL	CTD small phosphatase-like protein (Fragment)	1	1	1	1	0	1	0	1	1	1	0	1	0	1	1	1	0	1	0	1	1	1	6.1	6.1	6.1	22.322	196	196	0.0036123	3.1834	0	6.1	0	6.1	6.1	6.1	62607000	0	22266000	0	14702000	14500000
I3L0A0;Q13404;Q13404-7;Q13404-2;Q13404-1;Q13404-8;G3V2F7;A0A0A0MSL3;Q13404-6	I3L0A0;Q13404;Q13404-7;Q13404-2;Q13404-1;Q13404-8;G3V2F7;A0A0A0MSL3;Q13404-6	7;7;7;7;7;6;5;4;4	7;7;7;7;7;6;5;4;4	3;3;3;3;3;2;3;3;3	Ubiquitin-conjugating enzyme E2 variant 1	TMEM189-UBE2V1;UBE2V1	HCG2044781;Ubiquitin-conjugating enzyme E2 variant 1;Isoform 5 of Ubiquitin-conjugating enzyme E2 variant 1;Isoform 2 of Ubiquitin-conjugating enzyme E2 variant 1;Isoform 1 of Ubiquitin-conjugating enzyme E2 variant 1;Isoform 6 of Ubiquitin-conjugating enz	9	7	7	3	5	6	6	4	5	6	5	6	6	4	5	6	2	2	3	2	2	2	20.5	20.5	7.6	42.208	370	370;147;170;170;221;105;105;103;103	0	44.475	16.8	18.6	17.8	13.2	15.9	18.6	733160000	11761000	136670000	136100000	143470000	163210000
I3L0N3;P46459-2;P46459;I3L2G1;K7EQD6	I3L0N3;P46459-2;P46459	7;7;7;2;2	7;7;7;2;2	7;7;7;2;2	Vesicle-fusing ATPase	NSF	Vesicle-fusing ATPase;Isoform 2 of Vesicle-fusing ATPase;Vesicle-fusing ATPase	5	7	7	7	4	2	6	3	5	4	4	2	6	3	5	4	4	2	6	3	5	4	11.4	11.4	11.4	82.091	739	739;644;744;136;180	0	16.22	5.8	3.1	10	4.9	7.8	6.5	48529000	14741000	3421000	7828000	4888400	15341000
I3L2Q1;I3L1L9;I3L1R7;Q99447-2;Q99447-4;Q99447;Q99447-3	I3L2Q1;I3L1L9;I3L1R7;Q99447-2;Q99447-4;Q99447;Q99447-3	1;1;1;1;1;1;1	1;1;1;1;1;1;1	1;1;1;1;1;1;1	Ethanolamine-phosphate cytidylyltransferase	PCYT2	Ethanolamine-phosphate cytidylyltransferase (Fragment);Ethanolamine-phosphate cytidylyltransferase (Fragment);Ethanolamine-phosphate cytidylyltransferase;Isoform 2 of Ethanolamine-phosphate cytidylyltransferase;Isoform 4 of Ethanolamine-phosphate cytidylyl	7	1	1	1	0	0	0	1	0	0	0	0	0	1	0	0	0	0	0	1	0	0	7.7	7.7	7.7	32.031	286	286;314;367;311;357;389;407	0	9.5056	0	0	0	7.7	0	0	0	0	0	0	0	0
I3L1P5;O14964-2;O14964;I3L2H4;I3L165	I3L1P5;O14964-2;O14964;I3L2H4;I3L165	2;2;2;1;1	2;2;2;1;1	2;2;2;1;1	Hepatocyte growth factor-regulated tyrosine kinase substrate	HGS	Hepatocyte growth factor-regulated tyrosine kinase substrate (Fragment);Isoform 2 of Hepatocyte growth factor-regulated tyrosine kinase substrate;Hepatocyte growth factor-regulated tyrosine kinase substrate;Hepatocyte growth factor-regulated tyrosine kinas	5	2	2	2	0	1	2	2	0	1	0	1	2	2	0	1	0	1	2	2	0	1	9.1	9.1	9.1	30.004	263	263;690;777;59;71	0.0024615	3.5453	0	4.9	9.1	9.1	0	4.9	22344000	0	2286400	5183800	10590000	0
I3L1P8;Q02978;Q02978-2	I3L1P8;Q02978;Q02978-2	4;4;3	4;4;3	4;4;3	Mitochondrial 2-oxoglutarate/malate carrier protein	SLC25A11	Mitochondrial 2-oxoglutarate/malate carrier protein (Fragment);Mitochondrial 2-oxoglutarate/malate carrier protein;Isoform 2 of Mitochondrial 2-oxoglutarate/malate carrier protein	3	4	4	4	4	1	2	2	4	2	4	1	2	2	4	2	4	1	2	2	4	2	19.3	19.3	19.3	32.182	296	296;314;263	0	27.179	19.3	5.4	9.1	9.1	19.3	9.1	74322000	13987000	4060800	10399000	18412000	19678000
I3L3E4;I3L4G8;I3L4A1;Q96FZ7	I3L3E4;I3L4G8;I3L4A1;Q96FZ7	1;1;1;1	1;1;1;1	1;1;1;1	Charged multivesicular body protein 6	CHMP6	Charged multivesicular body protein 6 (Fragment);Charged multivesicular body protein 6 (Fragment);Charged multivesicular body protein 6 (Fragment);Charged multivesicular body protein 6	4	1	1	1	1	0	0	1	1	1	1	0	0	1	1	1	1	0	0	1	1	1	11.5	11.5	11.5	12.939	113	113;173;224;201	0.00063291	4.0004	11.5	0	0	11.5	11.5	11.5	4039500	1260900	0	0	1505100	1273600
I6L8B7;Q01469	I6L8B7;Q01469	1;1	1;1	1;1	Fatty acid-binding protein, epidermal	FABP5	Fatty acid-binding protein, epidermal;Fatty acid-binding protein, epidermal	2	1	1	1	0	0	1	0	0	0	0	0	1	0	0	0	0	0	1	0	0	0	13.9	13.9	13.9	11.257	101	101;135	0.0080092	2.5998	0	0	13.9	0	0	0	1299600	0	0	1299600	0	0
J3KN67;P06753-7;P06753;H0YLS7;H0YKZ6;D6RGJ6;A0A087WTJ7	J3KN67;P06753-7;P06753	13;8;8;1;1;1;1	1;0;1;1;1;1;1	0;0;0;0;0;0;0	Tropomyosin alpha-3 chain	TPM3	Tropomyosin alpha-3 chain;Isoform 7 of Tropomyosin alpha-3 chain;Tropomyosin alpha-3 chain	7	13	1	0	12	8	11	12	13	12	1	0	1	1	1	1	0	0	0	0	0	0	31.2	3.2	0	33.222	285	285;158;285;40;70;75;106	0.0079365	2.5268	28.8	18.6	27.4	28.8	31.2	28.8	39441000	4284000	0	2530400	14976000	9393300
J3KNF8;H3BUX2;O43169;D6RFH4;J3QR91	J3KNF8;H3BUX2;O43169;D6RFH4	5;4;4;3;1	5;4;4;3;1	5;4;4;3;1	Cytochrome b5 type B	CYB5B	Cytochrome b5 type B;Cytochrome b5 type B;Cytochrome b5 type B;Cytochrome b5 type B	5	5	5	5	5	4	3	5	5	5	5	4	3	5	5	5	5	4	3	5	5	5	59.3	59.3	59.3	16.694	150	150;140;146;131;64	0	108.93	59.3	46.7	40.7	59.3	59.3	59.3	343030000	49326000	21716000	50576000	68716000	68741000
J3KNQ4;Q9NVD7;E9PS97;Q9NVD7-2;A0A087WZB5;Q9HBI1-3;Q9HBI1;Q9HBI1-2	J3KNQ4;Q9NVD7;E9PS97	5;5;4;2;1;1;1;1	5;5;4;2;1;1;1;1	5;5;4;2;1;1;1;1	Alpha-parvin	PARVA	Alpha-parvin;Alpha-parvin;Alpha-parvin (Fragment)	8	5	5	5	2	1	4	2	3	2	2	1	4	2	3	2	2	1	4	2	3	2	16	16	16	46.589	412	412;372;209;182;289;327;364;397	0	15.063	6.8	3.4	12.6	7.3	10.7	7.3	24830000	6473300	7161000	1363700	8432500	1399000
J3QL05;J3KP15;Q01130-2;Q01130;Q9BRL6-2;Q9BRL6	J3QL05;J3KP15;Q01130-2;Q01130	3;3;3;3;1;1	3;3;3;3;1;1	3;3;3;3;1;1	Serine/arginine-rich splicing factor 2	SRSF2	Serine/arginine-rich-splicing factor 2 (Fragment);Serine/arginine-rich-splicing factor 2 (Fragment);Isoform 2 of Serine/arginine-rich splicing factor 2;Serine/arginine-rich splicing factor 2	6	3	3	3	3	2	3	2	2	1	3	2	3	2	2	1	3	2	3	2	2	1	31.5	31.5	31.5	15.156	130	130;133;209;221;275;282	0	30.984	31.5	18.5	31.5	25.4	25.4	12.3	75343000	23528000	6771100	20490000	9221900	9046800
J3KPM9;P42224-2;P42224;E7EPD2;D2KFR9;E7ENM1;E9PH66	J3KPM9;P42224-2;P42224;E7EPD2;D2KFR9	6;6;6;3;3;2;1	6;6;6;3;3;2;1	6;6;6;3;3;2;1	Signal transducer and activator of transcription;Signal transducer and activator of transcription 1-alpha/beta	STAT1	Signal transducer and activator of transcription;Isoform Beta of Signal transducer and activator of transcription 1-alpha/beta;Signal transducer and activator of transcription 1-alpha/beta;Signal transducer and activator of transcription 1-alpha/beta (Frag	7	6	6	6	2	0	1	4	2	2	2	0	1	4	2	2	2	0	1	4	2	2	12.3	12.3	12.3	83.359	714	714;712;750;180;193;150;69	0	18.182	4.1	0	1.8	8.8	4.9	4.1	29492000	2527000	0	1412700	17770000	4983900
J3KPX7;Q99623;F5GY37;Q99623-2;F5H3X6;F5GWA7;F5H0C5;F5H2D2;U3KPZ5	J3KPX7;Q99623;F5GY37;Q99623-2;F5H3X6;F5GWA7	9;9;8;7;5;5;2;1;1	9;9;8;7;5;5;2;1;1	9;9;8;7;5;5;2;1;1	Prohibitin-2	PHB2	Prohibitin-2;Prohibitin-2;Prohibitin-2;Isoform 2 of Prohibitin-2;Prohibitin-2 (Fragment);Prohibitin-2 (Fragment)	9	9	9	9	6	6	5	6	7	7	6	6	5	6	7	7	6	6	5	6	7	7	37.2	37.2	37.2	33.239	298	298;299;267;261;213;261;112;87;103	0	49.978	25.5	25.5	21.5	25.5	26.5	31.9	320580000	53690000	40035000	59573000	52648000	50565000
J3KQ32;Q9NTK5;Q9NTK5-3;Q9NTK5-2;C9JTK6;C9JCJ9	J3KQ32;Q9NTK5;Q9NTK5-3;Q9NTK5-2	18;18;13;10;6;5	18;18;13;10;6;5	18;18;13;10;6;5	Obg-like ATPase 1	OLA1	Obg-like ATPase 1;Obg-like ATPase 1;Isoform 3 of Obg-like ATPase 1;Isoform 2 of Obg-like ATPase 1	6	18	18	18	8	6	5	12	14	14	8	6	5	12	14	14	8	6	5	12	14	14	58.2	58.2	58.2	46.937	416	416;396;278;238;116;103	0	128.75	23.8	19	14.2	39.9	45.7	46.4	596040000	27360000	11529000	73524000	142620000	210570000
J3KQ34;Q9H9Q2;A0A087X1P5;J3KQ41;Q9H9Q2-2;Q9H9Q2-3;J3QT95;J3QT73	J3KQ34;Q9H9Q2;A0A087X1P5;J3KQ41;Q9H9Q2-2;Q9H9Q2-3	3;3;2;2;2;2;1;1	3;3;2;2;2;2;1;1	3;3;2;2;2;2;1;1	COP9 signalosome complex subunit 7b	COPS7B	COP9 signalosome complex subunit 7b;COP9 signalosome complex subunit 7b;COP9 signalosome complex subunit 7b;COP9 signalosome complex subunit 7b;Isoform 2 of COP9 signalosome complex subunit 7b;Isoform 3 of COP9 signalosome complex subunit 7b	8	3	3	3	0	0	0	2	2	1	0	0	0	2	2	1	0	0	0	2	2	1	19.1	19.1	19.1	26.424	230	230;264;209;278;157;273;150;172	0.00077101	8.0416	0	0	0	11.3	13.5	5.7	570460	0	0	0	0	570460
J3KQ48;Q9Y3E5	J3KQ48;Q9Y3E5	2;2	2;2	2;2	Peptidyl-tRNA hydrolase 2, mitochondrial	PTRH2	Peptidyl-tRNA hydrolase 2, mitochondrial;Peptidyl-tRNA hydrolase 2, mitochondrial	2	2	2	2	0	0	2	0	1	1	0	0	2	0	1	1	0	0	2	0	1	1	18.9	18.9	18.9	19.325	180	180;179	0.0030637	3.485	0	0	18.9	0	8.3	8.3	6136200	0	0	1658900	0	2239600
J3KQJ1;Q8NBJ7-2;Q8NBJ7;E9PBT8;C9JL30;A8MXB9;C9J660;F8WA42;Q8NBJ7-3;F8WEX5;E9PG02;J3QT17;H7C3B2;Q8NBJ7-5	J3KQJ1;Q8NBJ7-2;Q8NBJ7;E9PBT8;C9JL30;A8MXB9;C9J660;F8WA42;Q8NBJ7-3	3;3;3;2;2;2;2;2;2;1;1;1;1;1	3;3;3;2;2;2;2;2;2;1;1;1;1;1	3;3;3;2;2;2;2;2;2;1;1;1;1;1	Sulfatase-modifying factor 2	SUMF2	Sulfatase-modifying factor 2;Isoform 2 of Sulfatase-modifying factor 2;Sulfatase-modifying factor 2;Sulfatase-modifying factor 2;Sulfatase-modifying factor 2 (Fragment);Sulfatase-modifying factor 2;Sulfatase-modifying factor 2;Sulfatase-modifying factor 2;	14	3	3	3	0	0	2	0	1	0	0	0	2	0	1	0	0	0	2	0	1	0	11.6	11.6	11.6	35.922	320	320;213;301;232;293;305;352;358;339;165;183;236;304;217	0.0024555	3.5095	0	0	6.9	0	4.7	0	1518800	0	0	1518800	0	0
J3KR44;Q96FW1;F5H6Q1;F5GYJ8;F5GYN4;F5H3F0;Q96FW1-2	J3KR44;Q96FW1;F5H6Q1;F5GYJ8;F5GYN4;F5H3F0	9;9;8;8;7;6;4	9;9;8;8;7;6;4	9;9;8;8;7;6;4	Ubiquitin thioesterase OTUB1	OTUB1	Ubiquitin thioesterase;Ubiquitin thioesterase OTUB1;Ubiquitin thioesterase;Ubiquitin thioesterase OTUB1;Ubiquitin thioesterase OTUB1;Ubiquitin thioesterase OTUB1	7	9	9	9	6	7	4	7	8	7	6	7	4	7	8	7	6	7	4	7	8	7	46.3	46.3	46.3	31.44	272	272;271;280;286;241;170;315	0	51.054	25.7	38.6	18.8	35.3	36.8	30.1	175360000	22673000	11668000	15347000	45431000	55880000
J3KRT0;J3KS23;Q13951;Q13951-2;H3BSC0	J3KRT0;J3KS23;Q13951;Q13951-2;H3BSC0	2;2;2;2;1	2;2;2;2;1	2;2;2;2;1	Core-binding factor subunit beta	CBFB	Core-binding factor subunit beta (Fragment);Core-binding factor subunit beta;Core-binding factor subunit beta;Isoform 2 of Core-binding factor subunit beta;Core-binding factor subunit beta (Fragment)	5	2	2	2	1	2	2	2	0	1	1	2	2	2	0	1	1	2	2	2	0	1	47.5	47.5	47.5	7.3251	61	61;82;182;187;93	0.00078125	8.2479	26.2	47.5	47.5	47.5	0	21.3	1809600	0	0	0	0	0
J3KS05;P83916;K7ELA4;B5MD17;C9JWS9	J3KS05;P83916;K7ELA4;B5MD17	3;3;2;2;1	2;2;1;1;1	2;2;1;1;1	Chromobox protein homolog 1	CBX1	Chromobox protein homolog 1 (Fragment);Chromobox protein homolog 1;Chromobox protein homolog 1;Chromobox protein homolog 1 (Fragment)	5	3	2	2	1	1	2	2	3	3	0	0	1	1	2	2	0	0	1	1	2	2	32.9	23.7	23.7	20.03	173	173;185;138;168;110	0	9.5457	9.2	9.2	26	26	32.9	32.9	27378000	0	0	7152100	4668200	9430300
J3KS22;J3QS36;Q7Z4W1;J3KRZ4;J3KSZ5;J3QL34;J3QS45	J3KS22;J3QS36;Q7Z4W1;J3KRZ4;J3KSZ5;J3QL34	3;3;3;2;2;2;1	3;3;3;2;2;2;1	3;3;3;2;2;2;1	L-xylulose reductase	DCXR	L-xylulose reductase (Fragment);L-xylulose reductase (Fragment);L-xylulose reductase;L-xylulose reductase (Fragment);L-xylulose reductase (Fragment);L-xylulose reductase (Fragment)	7	3	3	3	0	0	0	3	0	0	0	0	0	3	0	0	0	0	0	3	0	0	22.4	22.4	22.4	23.803	223	223;225;244;141;143;176;100	0	11.85	0	0	0	22.4	0	0	5862000	0	0	0	5862000	0
J3KS31;J3QRS9;X6R4W8;O43670-3;O43670-2;O43670;O43670-4	J3KS31;J3QRS9;X6R4W8;O43670-3;O43670-2;O43670;O43670-4	2;2;2;2;2;2;2	2;2;2;2;2;2;2	2;2;2;2;2;2;2	BUB3-interacting and GLEBS motif-containing protein ZNF207	ZNF207	BUB3-interacting and GLEBS motif-containing protein ZNF207 (Fragment);BUB3-interacting and GLEBS motif-containing protein ZNF207;BUB3-interacting and GLEBS motif-containing protein ZNF207;Isoform 3 of BUB3-interacting and GLEBS motif-containing protein ZNF	7	2	2	2	2	1	1	0	1	1	2	1	1	0	1	1	2	1	1	0	1	1	7.3	7.3	7.3	34.987	341	341;493;497;395;463;478;494	0.00072674	6.7276	7.3	3.5	3.5	0	3.8	3.8	25209000	14354000	0	6680800	0	2136600
J3KTA4;P17844;P17844-2;J3QRQ7;J3KRZ1;J3QSF1;J3KRX8;J3QR02;J3QRN5;J3QLG9;J3QR62;X6RLV5	J3KTA4;P17844;P17844-2	19;19;16;9;8;6;4;3;2;1;1;1	13;13;10;7;3;3;4;3;2;1;1;1	13;13;10;7;3;3;4;3;2;1;1;1	Probable ATP-dependent RNA helicase DDX5	DDX5	Probable ATP-dependent RNA helicase DDX5;Probable ATP-dependent RNA helicase DDX5;Isoform 2 of Probable ATP-dependent RNA helicase DDX5	12	19	13	13	11	7	15	11	13	15	7	3	9	7	9	11	7	3	9	7	9	11	38.4	27.4	27.4	69.086	614	614;614;535;212;166;153;120;99;65;46;52;96	0	64.398	26.9	19.1	33.2	23	30.3	32.2	305070000	44799000	10930000	61824000	46033000	77530000
J3QR09;J3KTE4;P84098;J3QL15	J3QR09;J3KTE4;P84098	4;4;4;1	4;4;4;1	4;4;4;1	Ribosomal protein L19;60S ribosomal protein L19	RPL19	Ribosomal protein L19;Ribosomal protein L19;60S ribosomal protein L19	4	4	4	4	4	2	4	4	4	4	4	2	4	4	4	4	4	2	4	4	4	4	22.3	22.3	22.3	23.134	193	193;194;196;128	0	42.639	22.3	13.5	22.3	22.3	22.3	22.3	229140000	33775000	14066000	39694000	49869000	33783000
J3KTJ8;J3QRI7;J3QQQ9;J3QQV1;J3QRC4;P61254;E5RIT6;Q9UNX3;J3KSS0;E5RHH1;J3KS10	J3KTJ8;J3QRI7;J3QQQ9;J3QQV1;J3QRC4;P61254;E5RIT6;Q9UNX3;J3KSS0	5;5;5;5;5;5;4;4;3;2;1	5;5;5;5;5;5;4;4;3;2;1	5;5;5;5;5;5;4;4;3;2;1	60S ribosomal protein L26;60S ribosomal protein L26-like 1	RPL26;RPL26L1	60S ribosomal protein L26 (Fragment);60S ribosomal protein L26 (Fragment);Uncharacterized protein;60S ribosomal protein L26;60S ribosomal protein L26 (Fragment);60S ribosomal protein L26;60S ribosomal protein L26-like 1 (Fragment);60S ribosomal protein L26	11	5	5	5	1	3	1	4	3	1	1	3	1	4	3	1	1	3	1	4	3	1	44.8	44.8	44.8	11.498	96	96;107;107;110;135;145;128;145;63;38;63	0	12.837	9.4	26	9.4	36.5	27.1	9.4	175190000	0	2568000	0	98049000	69910000
J3KTL2;Q07955;Q07955-3;Q07955-2;J3KSR8;J3QQV5;J3KSW7	J3KTL2;Q07955;Q07955-3;Q07955-2;J3KSR8	10;10;9;9;5;3;3	10;10;9;9;5;3;3	10;10;9;9;5;3;3	Serine/arginine-rich splicing factor 1	SRSF1	Serine/arginine-rich-splicing factor 1;Serine/arginine-rich splicing factor 1;Isoform ASF-3 of Serine/arginine-rich splicing factor 1;Isoform ASF-2 of Serine/arginine-rich splicing factor 1;Serine/arginine-rich-splicing factor 1 (Fragment)	7	10	10	10	8	6	7	6	8	10	8	6	7	6	8	10	8	6	7	6	8	10	42.7	42.7	42.7	28.329	253	253;248;201;292;143;65;73	0	36.814	35.6	28.9	32.4	26.1	33.6	42.7	317430000	63516000	18292000	54322000	74427000	42214000
J3QL48;J3QQN1;P40306	J3QL48;J3QQN1;P40306	1;1;1	1;1;1	1;1;1	Proteasome subunit beta type-10	PSMB10	Uncharacterized protein (Fragment);Proteasome subunit beta type-10 (Fragment);Proteasome subunit beta type-10	3	1	1	1	0	0	0	1	1	1	0	0	0	1	1	1	0	0	0	1	1	1	26	26	26	8.2133	77	77;138;273	0	15.706	0	0	0	26	26	26	25313000	0	0	0	9558800	9986400
J3QLE5;P14678-2;P63162;P14678;P63162-2;P14678-3;J3KRY3;S4R3P3	J3QLE5;P14678-2;P63162;P14678;P63162-2;P14678-3;J3KRY3;S4R3P3	5;5;5;5;5;5;3;3	5;5;5;5;5;5;3;3	5;5;5;5;5;5;3;3	Small nuclear ribonucleoprotein-associated proteins B and B;Small nuclear ribonucleoprotein-associated protein N	SNRPN;SNRPB	Small nuclear ribonucleoprotein-associated protein N (Fragment);Isoform SM-B of Small nuclear ribonucleoprotein-associated proteins B and B;Small nuclear ribonucleoprotein-associated protein N;Small nuclear ribonucleoprotein-associated proteins B and B;I	8	5	5	5	1	2	3	3	3	3	1	2	3	3	3	3	1	2	3	3	3	3	26	26	26	17.546	169	169;231;240;240;244;289;59;70	0	12.161	8.9	13.6	17.8	21.9	21.3	21.3	38111000	6179300	2601700	1386300	12950000	7942600
J3QLR7;P62314	J3QLR7;P62314	1;1	1;1	1;1	Small nuclear ribonucleoprotein Sm D1	SNRPD1	Small nuclear ribonucleoprotein Sm D1;Small nuclear ribonucleoprotein Sm D1	2	1	1	1	1	1	1	0	0	0	1	1	1	0	0	0	1	1	1	0	0	0	25	25	25	5.3284	44	44;119	0.00063371	4.012	25	25	25	0	0	0	10868000	0	3528900	7339100	0	0
J3QQ67;Q07020;G3V203;H0YHA7;Q07020-2;F8VUA6;F8VYV2;A0A075B7A0;F8VXR6	J3QQ67;Q07020;G3V203;H0YHA7;Q07020-2;F8VUA6;F8VYV2;A0A075B7A0	6;6;5;5;5;4;4;3;1	6;6;5;5;5;4;4;3;1	6;6;5;5;5;4;4;3;1	60S ribosomal protein L18	RPL18	60S ribosomal protein L18 (Fragment);60S ribosomal protein L18;60S ribosomal protein L18;60S ribosomal protein L18 (Fragment);Isoform 2 of 60S ribosomal protein L18;60S ribosomal protein L18 (Fragment);60S ribosomal protein L18;60S ribosomal protein L18	9	6	6	6	3	3	3	5	5	4	3	3	3	5	5	4	3	3	3	5	5	4	36.3	36.3	36.3	21.728	190	190;188;164;167;159;130;133;138;84	0	61.054	20	20	20	29.5	28.9	22.6	445480000	41775000	41303000	47388000	167990000	56354000
J3QQZ9;Q9NVS9-3;Q9NVS9;J3QQV6;Q9NVS9-4	J3QQZ9;Q9NVS9-3;Q9NVS9;J3QQV6;Q9NVS9-4	2;2;2;1;1	2;2;2;1;1	2;2;2;1;1	Pyridoxine-5-phosphate oxidase	PNPO	Pyridoxine-5-phosphate oxidase (Fragment);Isoform 3 of Pyridoxine-5-phosphate oxidase;Pyridoxine-5-phosphate oxidase;Pyridoxine-5-phosphate oxidase (Fragment);Isoform 4 of Pyridoxine-5-phosphate oxidase	5	2	2	2	0	0	1	1	0	0	0	0	1	1	0	0	0	0	1	1	0	0	11.3	11.3	11.3	27.312	238	238;243;261;165;218	0.00065531	4.5319	0	0	3.8	7.6	0	0	1318900	0	0	1318900	0	0
J3QRD1;P51648;P51648-2;I3L1M4;J3QS00;J3QKK9;J3KTD9;I3L2W1;J3KTG1;C9JGJ2;I3L0X1	J3QRD1;P51648;P51648-2;I3L1M4	9;9;9;5;3;1;1;1;1;1;1	8;8;8;4;2;1;1;1;1;1;1	8;8;8;4;2;1;1;1;1;1;1	Fatty aldehyde dehydrogenase	ALDH3A2	Fatty aldehyde dehydrogenase;Fatty aldehyde dehydrogenase;Isoform 2 of Fatty aldehyde dehydrogenase;Fatty aldehyde dehydrogenase (Fragment)	11	9	8	8	0	0	0	6	8	7	0	0	0	5	7	6	0	0	0	5	7	6	28.8	25.7	25.7	44.648	393	393;485;508;162;134;54;62;97;146;166;182	0	35.336	0	0	0	18.1	24.7	22.9	140230000	0	0	0	34431000	47093000
J3QRP6;O14745	J3QRP6;O14745	1;1	1;1	1;1	Na(+)/H(+) exchange regulatory cofactor NHE-RF1	SLC9A3R1	Na(+)/H(+) exchange regulatory cofactor NHE-RF1 (Fragment);Na(+)/H(+) exchange regulatory cofactor NHE-RF1	2	1	1	1	0	0	0	0	1	0	0	0	0	0	1	0	0	0	0	0	1	0	6.5	6.5	6.5	22.871	215	215;358	0.0069971	2.7484	0	0	0	0	6.5	0	898820	0	0	0	0	898820
J3QRS3;P19105;J3KTJ1	J3QRS3;P19105;J3KTJ1	9;9;5	1;1;1	1;1;1	Myosin regulatory light chain 12A	MYL12A	Myosin regulatory light chain 12A;Myosin regulatory light chain 12A;Myosin regulatory light chain 12A (Fragment)	3	9	1	1	8	8	8	7	8	9	0	0	0	0	0	1	0	0	0	0	0	1	77.4	16.9	16.9	20.457	177	177;171;114	0.00065833	4.5862	60.5	60.5	60.5	55.4	60.5	77.4	2712500	0	0	0	0	0
J3QSV6;O76021;I3L3U9;I3L234;I3L3C4;O76021-2	J3QSV6;O76021;I3L3U9	3;3;2;1;1;1	3;3;2;1;1;1	3;3;2;1;1;1	Ribosomal L1 domain-containing protein 1	RSL1D1	Ribosomal L1 domain-containing protein 1 (Fragment);Ribosomal L1 domain-containing protein 1;Ribosomal L1 domain-containing protein 1 (Fragment)	6	3	3	3	0	1	2	1	1	2	0	1	2	1	1	2	0	1	2	1	1	2	10.7	10.7	10.7	48.208	430	430;490;296;98;158;270	0	9.3692	0	3.5	7.9	4.4	4.4	7.2	32484000	0	1905900	12071000	5908300	5792700
J3QT28;O43684-2;O43684;J3QSX4	J3QT28;O43684-2;O43684;J3QSX4	6;6;6;4	6;6;6;4	6;6;6;4	Mitotic checkpoint protein BUB3	BUB3	Mitotic checkpoint protein BUB3 (Fragment);Isoform 2 of Mitotic checkpoint protein BUB3;Mitotic checkpoint protein BUB3;Mitotic checkpoint protein BUB3	4	6	6	6	5	3	5	4	4	5	5	3	5	4	4	5	5	3	5	4	4	5	34.2	34.2	34.2	31.703	278	278;326;328;145	0	22.16	31.7	16.9	31.7	24.5	24.5	27	131380000	18582000	9759200	40258000	26959000	9597800
J9JIE6;Q9UM00-2;Q9UM00;J3QQY2;J3KS45;J3KTQ7	J9JIE6;Q9UM00-2;Q9UM00;J3QQY2;J3KS45	3;3;3;2;2;1	3;3;3;2;2;1	3;3;3;2;2;1	Transmembrane and coiled-coil domain-containing protein 1	TMCO1	Calcium load-activated calcium channel;Isoform 2 of Calcium load-activated calcium channel;Calcium load-activated calcium channel;Calcium load-activated calcium channel;Calcium load-activated calcium channel (Fragment)	6	3	3	3	1	1	2	1	1	0	1	1	2	1	1	0	1	1	2	1	1	0	13.4	13.4	13.4	27.079	239	239;169;188;104;143;152	0.00077942	8.2262	6.3	6.3	9.6	3.8	6.3	0	30467000	6470200	4114500	8270600	3818500	7793500
K4DI93;Q13620-3;Q13620-1;Q13620;A0A087WWN2;A6NE76;A0A0A0MR50;Q13619-2;Q13619	K4DI93;Q13620-3;Q13620-1;Q13620	4;4;4;4;1;1;1;1;1	4;4;4;4;1;1;1;1;1	4;4;4;4;1;1;1;1;1	Cullin-4B	CUL4B	Cullin 4B, isoform CRA_e;Isoform 3 of Cullin-4B;Isoform 2 of Cullin-4B;Cullin-4B	9	4	4	4	0	0	1	2	2	1	0	0	1	2	2	1	0	0	1	2	2	1	4.9	4.9	4.9	102.75	900	900;717;895;913;174;234;667;659;759	0.00068634	5.401	0	0	1.1	2.4	2.3	1.2	5800300	0	0	0	0	3132200
K7EM02;K7EIJ8;Q8IYT4-2;Q8IYT4	K7EM02;K7EIJ8;Q8IYT4-2;Q8IYT4	1;1;1;1	1;1;1;1	1;1;1;1	Katanin p60 ATPase-containing subunit A-like 2	KATNAL2	Katanin p60 ATPase-containing subunit A-like 2 (Fragment);Katanin p60 ATPase-containing subunit A-like 2 (Fragment);Isoform 2 of Katanin p60 ATPase-containing subunit A-like 2;Katanin p60 ATPase-containing subunit A-like 2	4	1	1	1	1	1	1	1	1	1	1	1	1	1	1	1	1	1	1	1	1	1	9.4	9.4	9.4	13.999	128	128;341;466;538	0.00065317	4.4612	9.4	9.4	9.4	9.4	9.4	9.4	59970000	10106000	6935600	12370000	9874500	9767200
K7EK07;P84243;Q16695;K7EMV3;B4DEB1;K7ES00;Q6NXT2;K7EP01	K7EK07;P84243;Q16695;K7EMV3;B4DEB1;K7ES00;Q6NXT2	5;5;4;3;3;3;3;2	1;1;0;0;0;0;0;0	1;1;0;0;0;0;0;0	Histone H3;Histone H3.3;Histone H3.1t;Histone H3.3C	H3F3B;H3F3A;HIST3H3;H3F3C	Histone H3 (Fragment);Histone H3.3;Histone H3.1t;Histone H3;Histone H3;Histone H3.3 (Fragment);Histone H3.3C	8	5	1	1	5	4	5	5	5	5	1	0	1	1	1	1	1	0	1	1	1	1	47	24.2	24.2	14.914	132	132;136;136;92;123;151;135;113	0	37.403	47	22.7	47	47	47	47	161070000	20563000	0	61010000	21100000	27508000
K7EQ02;K7EQ55;K7EK33;Q96EP5-2;Q96EP5	K7EQ02;K7EQ55;K7EK33;Q96EP5-2;Q96EP5	4;4;4;4;4	4;4;4;4;4	4;4;4;4;4	DAZ-associated protein 1	DAZAP1	DAZ-associated protein 1 (Fragment);DAZ-associated protein 1;DAZ-associated protein 1;Isoform 2 of DAZ-associated protein 1;DAZ-associated protein 1	5	4	4	4	4	4	4	3	4	4	4	4	4	3	4	4	4	4	4	3	4	4	22.6	22.6	22.6	35.02	327	327;406;406;378;407	0	24.593	22.6	22.6	22.6	17.7	22.6	22.6	171740000	21101000	20562000	28653000	29200000	32198000
K7EKE6;K7EJE8;P36776-3;P36776-2;P36776;K7ER27;K7ERR6;K7ER56	K7EKE6;K7EJE8;P36776-3;P36776-2;P36776	15;14;14;14;14;3;2;1	15;14;14;14;14;3;2;1	15;14;14;14;14;3;2;1	Lon protease homolog, mitochondrial	LONP1	Lon protease homolog, mitochondrial;Lon protease homolog, mitochondrial;Isoform 3 of Lon protease homolog, mitochondrial;Isoform 2 of Lon protease homolog, mitochondrial;Lon protease homolog, mitochondrial	8	15	15	15	9	4	8	6	6	8	9	4	8	6	6	8	9	4	8	6	6	8	31.4	31.4	31.4	95.179	845	845;829;763;895;959;242;264;210	0	70.645	19.2	7.1	17.6	17.6	14.9	16.6	187210000	23856000	4502700	71297000	34863000	23244000
K7EKL3;P28799-3;P28799-2;P28799	K7EKL3;P28799-3;P28799-2;P28799	1;1;1;1	1;1;1;1	1;1;1;1	Granulins;Acrogranin;Paragranulin;Granulin-1;Granulin-2;Granulin-3;Granulin-4;Granulin-5;Granulin-6;Granulin-7	GRN	Granulins (Fragment);Isoform 3 of Granulins;Isoform 2 of Granulins;Granulins	4	1	1	1	1	0	1	1	1	1	1	0	1	1	1	1	1	0	1	1	1	1	3.9	3.9	3.9	41.238	388	388;413;438;593	0.00064392	4.2306	3.9	0	3.9	3.9	3.9	3.9	0	0	0	0	0	0
K7ELC2;P62841;K7EM56;A0A0B4J2B4;K7EJ78;S4R417;K7EQJ5;S4R456	K7ELC2;P62841;K7EM56;A0A0B4J2B4;K7EJ78;S4R417;K7EQJ5;S4R456	4;4;3;3;3;3;3;2	4;4;3;3;3;3;3;2	4;4;3;3;3;3;3;2	40S ribosomal protein S15	RPS15	40S ribosomal protein S15;40S ribosomal protein S15;40S ribosomal protein S15;40S ribosomal protein S15;40S ribosomal protein S15;40S ribosomal protein S15;40S ribosomal protein S15;40S ribosomal protein S15 (Fragment)	8	4	4	4	3	3	2	4	3	3	3	3	2	4	3	3	3	3	2	4	3	3	52.6	52.6	52.6	17.723	152	152;145;112;118;129;135;141;68	0	67.676	44.7	44.7	32.2	52.6	40.1	44.7	386590000	53763000	40989000	74065000	71472000	84189000
K7ELL7;P14314-2;P14314;A0A0C4DGP4;K7EPW7;K7EKX1;K7EJ70;K7EIP3	K7ELL7;P14314-2;P14314	16;15;15;6;5;4;4;1	16;15;15;6;5;4;4;1	16;15;15;6;5;4;4;1	Glucosidase 2 subunit beta	PRKCSH	Glucosidase 2 subunit beta;Isoform 2 of Glucosidase 2 subunit beta;Glucosidase 2 subunit beta	8	16	16	16	11	9	14	14	11	12	11	9	14	14	11	12	11	9	14	14	11	12	49.2	49.2	49.2	60.192	535	535;525;528;200;168;140;144;62	0	183.09	37.4	25.4	40.6	43.7	39.4	40.9	922360000	144410000	98672000	236820000	136100000	140150000
K7ENJ0;K7ELW1;P54725-2;P54725-3;P54725	K7ENJ0;K7ELW1;P54725-2;P54725-3;P54725	2;2;2;2;2	1;1;1;1;1	1;1;1;1;1	UV excision repair protein RAD23 homolog A	RAD23A	UV excision repair protein RAD23 homolog A;UV excision repair protein RAD23 homolog A;Isoform 2 of UV excision repair protein RAD23 homolog A;Isoform 3 of UV excision repair protein RAD23 homolog A;UV excision repair protein RAD23 homolog A	5	2	1	1	1	1	1	2	0	1	0	0	1	1	0	0	0	0	1	1	0	0	12.2	6.5	6.5	14.855	139	139;142;308;362;363	0.0090141	2.4501	5.8	5.8	6.5	12.2	0	5.8	8585700	0	0	4162600	4423100	0
K7EM18;P41567;O60739	K7EM18;P41567;O60739	3;3;2	3;3;2	3;3;2	Eukaryotic translation initiation factor 1;Eukaryotic translation initiation factor 1b	EIF1;EIF1B	Eukaryotic translation initiation factor 1;Eukaryotic translation initiation factor 1;Eukaryotic translation initiation factor 1b	3	3	3	3	1	0	0	1	1	1	1	0	0	1	1	1	1	0	0	1	1	1	38.8	38.8	38.8	13.607	121	121;113;113	0	9.4863	13.2	0	0	14	13.2	11.6	13303000	3768800	0	0	4628800	4905300
K7EP07;Q99426-2;Q99426;K7EK42;K7EL99;K7EQH0;K7ER04	K7EP07;Q99426-2;Q99426;K7EK42	5;5;5;4;2;1;1	5;5;5;4;2;1;1	5;5;5;4;2;1;1	Tubulin-folding cofactor B	TBCB	Tubulin-folding cofactor B (Fragment);Isoform 2 of Tubulin-folding cofactor B;Tubulin-folding cofactor B;Tubulin-folding cofactor B	7	5	5	5	4	4	4	2	3	3	4	4	4	2	3	3	4	4	4	2	3	3	40.2	40.2	40.2	19.251	169	169;193;244;191;133;45;60	0	26.562	28.4	34.9	33.7	18.3	23.7	23.7	93068000	27029000	8632300	31302000	4523700	13678000
K7EPE7;Q96GC9-2;Q96GC9	K7EPE7;Q96GC9-2;Q96GC9	1;1;1	1;1;1	1;1;1	Vacuole membrane protein 1	VMP1	Vacuole membrane protein 1 (Fragment);Isoform 2 of Vacuole membrane protein 1;Vacuole membrane protein 1	3	1	1	1	1	1	1	1	0	1	1	1	1	1	0	1	1	1	1	1	0	1	13.3	13.3	13.3	25.147	225	225;214;406	0	27.585	13.3	13.3	13.3	13.3	0	13.3	33016000	6734700	3542900	6352700	9027700	0
K7EQA1;O14737;K7ESJ4;O14737-2	K7EQA1;O14737;K7ESJ4;O14737-2	2;2;1;1	2;2;1;1	2;2;1;1	Programmed cell death protein 5	PDCD5	Programmed cell death protein 5;Programmed cell death protein 5;Programmed cell death protein 5;Isoform 2 of Programmed cell death protein 5	4	2	2	2	2	2	2	1	1	2	2	2	2	1	1	2	2	2	2	1	1	2	27.6	27.6	27.6	10.004	87	87;125;65;129	0.0007622	7.7438	27.6	27.6	27.6	14.9	14.9	27.6	17417000	3442300	2814500	7152800	2330100	0
K7EQA8;Q86X55-2;Q86X55-1;Q86X55	K7EQA8;Q86X55-2;Q86X55-1;Q86X55	2;2;2;2	2;2;2;2	2;2;2;2	Histone-arginine methyltransferase CARM1	CARM1	Histone-arginine methyltransferase CARM1 (Fragment);Isoform 2 of Histone-arginine methyltransferase CARM1;Isoform 1 of Histone-arginine methyltransferase CARM1;Histone-arginine methyltransferase CARM1	4	2	2	2	1	2	0	1	1	1	1	2	0	1	1	1	1	2	0	1	1	1	7.9	7.9	7.9	38.307	343	343;384;585;608	0.00065274	4.4595	5.2	7.9	0	5.2	5.2	5.2	22229000	6220000	2186000	0	2708500	7700600
K7ER96;O43396;K7EPB7	K7ER96;O43396	6;6;1	6;6;1	2;2;0	Thioredoxin-like protein 1	TXNL1	Thioredoxin-like protein 1 (Fragment);Thioredoxin-like protein 1	3	6	6	2	0	0	1	4	2	4	0	0	1	4	2	4	0	0	1	2	0	1	33.5	33.5	11.4	31.355	281	281;289;69	0	19.701	0	0	8.2	22.8	12.1	24.2	37157000	0	0	0	13759000	10957000
K7ES02;Q13867	K7ES02;Q13867	1;1	1;1	1;1	Bleomycin hydrolase	BLMH	Bleomycin hydrolase (Fragment);Bleomycin hydrolase	2	1	1	1	0	0	0	0	0	1	0	0	0	0	0	1	0	0	0	0	0	1	3.5	3.5	3.5	37.198	318	318;455	0.0079591	2.5484	0	0	0	0	0	3.5	0	0	0	0	0	0
M0QXB4;O14579;O14579-2;O14579-3;M0R061	M0QXB4;O14579;O14579-2;O14579-3	7;7;6;4;3	7;7;6;4;3	7;7;6;4;3	Coatomer subunit epsilon	COPE	Coatomer protein complex, subunit epsilon, isoform CRA_g;Coatomer subunit epsilon;Isoform 2 of Coatomer subunit epsilon;Isoform 3 of Coatomer subunit epsilon	5	7	7	7	4	4	4	6	6	5	4	4	4	6	6	5	4	4	4	6	6	5	50.8	50.8	50.8	36.923	331	331;308;257;256;146	0	84.953	24.8	24.8	24.8	42.9	45.6	33.2	144970000	23830000	5557300	18683000	29044000	40316000
M0QXH0;Q99757	M0QXH0;Q99757	1;1	1;1	1;1	Thioredoxin, mitochondrial	TXN2	Thioredoxin, mitochondrial;Thioredoxin, mitochondrial	2	1	1	1	0	0	0	1	0	1	0	0	0	1	0	1	0	0	0	1	0	1	23.4	23.4	23.4	7.0271	64	64;166	0.00063131	3.9732	0	0	0	23.4	0	23.4	14908000	0	0	0	9146400	0
M0QZ21;M0R0N4;X6R390;M0QYZ2;P53680-2;P53680;M0R1S0	M0QZ21;M0R0N4;X6R390;M0QYZ2;P53680-2;P53680;M0R1S0	2;2;2;2;2;2;1	2;2;2;2;2;2;1	2;2;2;2;2;2;1	AP-2 complex subunit sigma	AP2S1	AP complex subunit sigma;AP complex subunit sigma;AP complex subunit sigma;AP complex subunit sigma;Isoform 2 of AP-2 complex subunit sigma;AP-2 complex subunit sigma;AP-2 complex subunit sigma	7	2	2	2	0	0	1	1	0	1	0	0	1	1	0	1	0	0	1	1	0	1	22.1	22.1	22.1	14.557	122	122;144;156;158;104;142;92	0.00068213	5.3294	0	0	12.3	9.8	0	9.8	3613000	0	0	0	1694200	0
M0R080;P25685-2;P25685;M0R128;A0A1B0GX60;M0R1D6;M0QZD0;M0QYT3;M0QXK0	M0R080;P25685-2;P25685;M0R128;A0A1B0GX60;M0R1D6;M0QZD0;M0QYT3;M0QXK0	4;4;4;2;2;2;2;2;2	4;4;4;2;2;2;2;2;2	4;4;4;2;2;2;2;2;2	DnaJ homolog subfamily B member 1	DNAJB1	DnaJ homolog subfamily B member 1 (Fragment);Isoform 2 of DnaJ homolog subfamily B member 1;DnaJ homolog subfamily B member 1;DnaJ homolog subfamily B member 1 (Fragment);DnaJ homolog subfamily B member 1 (Fragment);DnaJ homolog subfamily B member 1 (Fragm	9	4	4	4	2	2	3	1	2	2	2	2	3	1	2	2	2	2	3	1	2	2	25.7	25.7	25.7	20.497	183	183;240;340;79;80;91;107;116;162	0	11.447	11.5	11.5	16.9	5.5	11.5	14.2	19969000	2687900	0	7338000	4404600	2839900
M0R0F0;P46782;M0R0R2;M0QZN2	M0R0F0;P46782;M0R0R2	9;9;8;4	9;9;8;4	9;9;8;4	40S ribosomal protein S5;40S ribosomal protein S5, N-terminally processed	RPS5	40S ribosomal protein S5 (Fragment);40S ribosomal protein S5;40S ribosomal protein S5	4	9	9	9	7	8	7	8	7	7	7	8	7	8	7	7	7	8	7	8	7	7	60.5	60.5	60.5	22.391	200	200;204;225;134	0	134.3	55	60	55	55.5	55	55	633580000	106940000	54880000	113790000	125580000	100170000
M0R117;Q02543;M0R3D6;M0R1A7;M0R0P7	M0R117;Q02543;M0R3D6;M0R1A7;M0R0P7	8;8;7;7;4	8;8;7;7;4	8;8;7;7;4	60S ribosomal protein L18a	RPL18A	60S ribosomal protein L18a;60S ribosomal protein L18a;60S ribosomal protein L18a (Fragment);60S ribosomal protein L18a;60S ribosomal protein L18a	5	8	8	8	7	7	7	6	7	8	7	7	7	6	7	8	7	7	7	6	7	8	46.1	46.1	46.1	18.079	154	154;176;141;147;137	0	62.391	44.8	44.8	44.8	40.3	41.6	46.1	463500000	83478000	55283000	96503000	52017000	72385000
O00116;A0A1B0GWA2;B8ZZ81	O00116;A0A1B0GWA2	16;13;4	16;13;4	16;13;4	Alkyldihydroxyacetonephosphate synthase, peroxisomal	AGPS	Alkyldihydroxyacetonephosphate synthase, peroxisomal;Alkylglycerone-phosphate synthase (Fragment)	3	16	16	16	1	0	0	10	8	11	1	0	0	10	8	11	1	0	0	10	8	11	40.4	40.4	40.4	72.911	658	658;543;189	0	62.644	1.8	0	0	27.8	22.6	30.2	206750000	0	0	0	80864000	50252000
O00148;O00148-2;O00148-3;K7EQN7;K7EPJ3;K7EN69;K7ENP6;K7EL56;K7EIL8;A0A0D9SEM9	O00148;O00148-2;O00148-3;K7EQN7	14;11;9;8;6;5;4;4;4;3	5;4;3;3;1;1;1;1;1;2	5;4;3;3;1;1;1;1;1;2	ATP-dependent RNA helicase DDX39A	DDX39A	ATP-dependent RNA helicase DDX39A;Isoform 2 of ATP-dependent RNA helicase DDX39A;Isoform 3 of ATP-dependent RNA helicase DDX39A;ATP-dependent RNA helicase DDX39A (Fragment)	10	14	5	5	10	10	14	9	9	9	1	2	5	0	0	0	1	2	5	0	0	0	46.4	19.9	19.9	49.129	427	427;322;267;255;189;130;92;108;125;96	0	17.909	29	31.9	46.4	26.5	26.5	26.5	39579000	0	4161700	35417000	0	0
O00151	O00151	9	9	9	PDZ and LIM domain protein 1	PDLIM1	PDZ and LIM domain protein 1	1	9	9	9	8	5	8	0	0	0	8	5	8	0	0	0	8	5	8	0	0	0	47.4	47.4	47.4	36.071	329	329	0	89.759	44.4	23.7	42.9	0	0	0	101180000	40105000	11474000	49605000	0	0
O00154-6;O00154-4;O00154-7;O00154;O00154-5;K7EKP8;O00154-2;O00154-3	O00154-6;O00154-4;O00154-7;O00154;O00154-5;K7EKP8;O00154-2;O00154-3	9;9;9;9;8;6;6;6	9;9;9;9;8;6;6;6	9;9;9;9;8;6;6;6	Cytosolic acyl coenzyme A thioester hydrolase	ACOT7	Isoform 6 of Cytosolic acyl coenzyme A thioester hydrolase;Isoform 4 of Cytosolic acyl coenzyme A thioester hydrolase;Isoform 7 of Cytosolic acyl coenzyme A thioester hydrolase;Cytosolic acyl coenzyme A thioester hydrolase;Isoform 5 of Cytosolic acyl coenz	8	9	9	9	4	4	4	4	6	6	4	4	4	4	6	6	4	4	4	4	6	6	40.1	40.1	40.1	36.567	329	329;338;370;380;350;279;246;283	0	36.693	16.4	16.4	17.6	18.8	29.5	27.4	161190000	13052000	5672000	20506000	27559000	33804000
O00194;H3BU81;K7ES41;H3BUD9;H3BS49;H3BVH7;H3BN55;P51159-2;P51159	O00194;H3BU81;K7ES41;H3BUD9;H3BS49;H3BVH7;H3BN55;P51159-2;P51159	2;1;1;1;1;1;1;1;1	2;1;1;1;1;1;1;1;1	2;1;1;1;1;1;1;1;1	Ras-related protein Rab-27B;Ras-related protein Rab-27A	RAB27B;RAB27A	Ras-related protein Rab-27B;Ras-related protein Rab-27A (Fragment);Ras-related protein Rab-27B (Fragment);Ras-related protein Rab-27A (Fragment);Ras-related protein Rab-27A (Fragment);Ras-related protein Rab-27A (Fragment);Ras-related protein Rab-27A (Frag	9	2	2	2	1	1	1	0	0	0	1	1	1	0	0	0	1	1	1	0	0	0	9.6	9.6	9.6	24.608	218	218;71;87;95;136;146;185;213;221	0.00065963	4.606	4.6	5	5	0	0	0	6849100	0	1225700	5623400	0	0
O00231;O00231-2;J3QRY4;J3KSW3;J3QS13	O00231;O00231-2	12;11;5;1;1	12;11;5;1;1	12;11;5;1;1	26S proteasome non-ATPase regulatory subunit 11	PSMD11	26S proteasome non-ATPase regulatory subunit 11;Isoform 2 of 26S proteasome non-ATPase regulatory subunit 11	5	12	12	12	7	6	8	11	10	9	7	6	8	11	10	9	7	6	8	11	10	9	35.5	35.5	35.5	47.463	422	422;423;187;45;90	0	42.112	23.5	19	24.2	32.2	31	26.5	222800000	42142000	16251000	49848000	37582000	35545000
O00232;O00232-2;J3KTJ5;J3KSK1	O00232;O00232-2	10;8;1;1	10;8;1;1	10;8;1;1	26S proteasome non-ATPase regulatory subunit 12	PSMD12	26S proteasome non-ATPase regulatory subunit 12;Isoform 2 of 26S proteasome non-ATPase regulatory subunit 12	4	10	10	10	7	5	5	7	9	6	7	5	5	7	9	6	7	5	5	7	9	6	30	30	30	52.904	456	456;436;38;42	0	39.87	22.1	13.6	15.8	20.4	25.9	17.3	198180000	27744000	15065000	27970000	34004000	48587000
O00264;O00264-2	O00264;O00264-2	7;4	7;4	6;4	Membrane-associated progesterone receptor component 1	PGRMC1	Membrane-associated progesterone receptor component 1;Isoform 2 of Membrane-associated progesterone receptor component 1	2	7	7	6	6	6	5	3	3	3	6	6	5	3	3	3	5	5	4	2	2	2	56.9	56.9	52.3	21.671	195	195;143	0	120.25	49.7	49.7	45.6	27.7	30.8	30.8	257870000	50228000	35475000	121820000	19945000	16497000
O00299	O00299	15	15	15	Chloride intracellular channel protein 1	CLIC1	Chloride intracellular channel protein 1	1	15	15	15	13	11	13	12	13	12	13	11	13	12	13	12	13	11	13	12	13	12	79.3	79.3	79.3	26.922	241	241	0	264.44	70.1	61	70.1	72.2	75.5	72.2	1446200000	192180000	93982000	243540000	283010000	302870000
O00303;H0YDT6;E9PQV8;A0A1W2PP79	O00303	10;3;1;1	10;3;1;1	10;3;1;1	Eukaryotic translation initiation factor 3 subunit F	EIF3F	Eukaryotic translation initiation factor 3 subunit F	4	10	10	10	8	9	7	9	9	8	8	9	7	9	9	8	8	9	7	9	9	8	45.7	45.7	45.7	37.563	357	357;100;124;124	0	101.03	33.6	37.8	29.7	42.3	42.3	34.5	349030000	50315000	40563000	88154000	62241000	65931000
O00410;H0Y8C6;O00410-3;O00410-2;C9JMV5;E7ETV3;H0Y3V4;E7EQT5;C9JZ53;E7EV12;C9JZD8;E7EWK4;E7EX05;O60518;C9J875;C9JQT6;E7ESA1;E7ESZ1;E7ETV8	O00410;H0Y8C6;O00410-3;O00410-2	31;30;30;29;5;5;5;4;3;3;2;2;2;2;1;1;1;1;1	31;30;30;29;5;5;5;4;3;3;2;2;2;2;1;1;1;1;1	31;30;30;29;5;5;5;4;3;3;2;2;2;2;1;1;1;1;1	Importin-5	IPO5	Importin-5;Importin-5 (Fragment);Isoform 3 of Importin-5;Isoform 2 of Importin-5	19	31	31	31	23	17	23	18	16	18	23	17	23	18	16	18	23	17	23	18	16	18	46.3	46.3	46.3	123.63	1097	1097;1099;1115;1037;165;170;182;126;77;142;74;117;119;1105;75;88;98;106;128	0	149.76	34.8	25.4	34.2	27.6	24.6	27.3	595950000	110870000	54970000	158610000	90427000	72109000
O00425;O00425-2	O00425	4;1	4;1	4;1	Insulin-like growth factor 2 mRNA-binding protein 3	IGF2BP3	Insulin-like growth factor 2 mRNA-binding protein 3	2	4	4	4	1	0	4	3	3	3	1	0	4	3	3	3	1	0	4	3	3	3	10.7	10.7	10.7	63.704	579	579;198	0	10.845	2.4	0	10.7	7.4	7.4	7.4	32098000	2521700	0	10877000	4720300	4825700
O00442;O00442-2;A6NIC1	O00442;O00442-2;A6NIC1	3;3;2	3;3;2	3;3;2	RNA 3-terminal phosphate cyclase	RTCA	RNA 3-terminal phosphate cyclase;Isoform 2 of RNA 3-terminal phosphate cyclase;RNA 3-terminal phosphate cyclase	3	3	3	3	1	1	1	0	0	0	1	1	1	0	0	0	1	1	1	0	0	0	10.9	10.9	10.9	39.336	366	366;379;49	0.00069589	5.6741	3.8	2.7	4.4	0	0	0	486090	0	486090	0	0	0
O00469-2;E7ETU9;O00469;O00469-3;C9JXZ0;F8WEW3	O00469-2;E7ETU9;O00469;O00469-3	22;21;21;12;8;1	22;21;21;12;8;1	22;21;21;12;8;1	Procollagen-lysine,2-oxoglutarate 5-dioxygenase 2	PLOD2	Isoform 2 of Procollagen-lysine,2-oxoglutarate 5-dioxygenase 2;Procollagen-lysine,2-oxoglutarate 5-dioxygenase 2;Procollagen-lysine,2-oxoglutarate 5-dioxygenase 2;Isoform 3 of Procollagen-lysine,2-oxoglutarate 5-dioxygenase 2	6	22	22	22	16	18	16	15	18	19	16	18	16	15	18	19	16	18	16	15	18	19	36.7	36.7	36.7	87.097	758	758;703;737;418;229;98	0	184.8	24.7	29.4	26.5	23.1	31.4	29.7	825710000	125500000	95654000	156730000	130850000	150900000
O00479	O00479	1	1	1	High mobility group nucleosome-binding domain-containing protein 4	HMGN4	High mobility group nucleosome-binding domain-containing protein 4	1	1	1	1	0	1	0	1	1	1	0	1	0	1	1	1	0	1	0	1	1	1	10	10	10	9.5388	90	90	0.0030506	3.37	0	10	0	10	10	10	55706000	0	0	0	39765000	0
O00487;C9JW37	O00487	5;2	5;2	5;2	26S proteasome non-ATPase regulatory subunit 14	PSMD14	26S proteasome non-ATPase regulatory subunit 14	2	5	5	5	3	2	4	2	4	3	3	2	4	2	4	3	3	2	4	2	4	3	29.7	29.7	29.7	34.577	310	310;84	0	23.757	13.5	9.4	24.5	6.5	18.7	20.3	66612000	6868000	3654600	25756000	2408800	7840200
O00499-9;O00499-10;O00499-7;O00499-8;O00499-4;O00499-6;O00499-11;O00499-3;O00499-2;O00499-5;O00499	O00499-9;O00499-10;O00499-7;O00499-8;O00499-4;O00499-6;O00499-11;O00499-3;O00499-2;O00499-5;O00499	6;6;6;6;6;6;6;6;6;6;6	6;6;6;6;6;6;6;6;6;6;6	6;6;6;6;6;6;6;6;6;6;6	Myc box-dependent-interacting protein 1	BIN1	Isoform BIN1-10-13 of Myc box-dependent-interacting protein 1;Isoform BIN1-13 of Myc box-dependent-interacting protein 1;Isoform II3 of Myc box-dependent-interacting protein 1;Isoform BIN1 of Myc box-dependent-interacting protein 1;Isoform IIC2 of Myc box-	11	6	6	6	0	0	1	3	5	4	0	0	1	3	5	4	0	0	1	3	5	4	26.9	26.9	26.9	45.563	409	409;424;439;454;475;482;497;506;518;550;593	0	24.729	0	0	4.6	13.2	22	16.4	50608000	0	0	3871200	15848000	13584000
O00507-2;O00507;Q93008-1;Q93008	O00507-2;O00507;Q93008-1;Q93008	2;2;1;1	2;2;1;1	2;2;1;1	Probable ubiquitin carboxyl-terminal hydrolase FAF-Y;Probable ubiquitin carboxyl-terminal hydrolase FAF-X	USP9Y;USP9X	Isoform Short of Probable ubiquitin carboxyl-terminal hydrolase FAF-Y;Probable ubiquitin carboxyl-terminal hydrolase FAF-Y;Isoform 2 of Probable ubiquitin carboxyl-terminal hydrolase FAF-X;Probable ubiquitin carboxyl-terminal hydrolase FAF-X	4	2	2	2	1	1	1	0	0	0	1	1	1	0	0	0	1	1	1	0	0	0	1.4	1.4	1.4	235.72	2070	2070;2555;2554;2570	0.0012453	3.7755	0.5	0.9	0.5	0	0	0	6699600	2047300	4652300	0	0	0
O00567;Q5JXT2;H0Y653;H0YDU4	O00567	7;3;2;2	7;3;2;2	7;3;2;2	Nucleolar protein 56	NOP56	Nucleolar protein 56	4	7	7	7	0	0	0	6	4	5	0	0	0	6	4	5	0	0	0	6	4	5	15	15	15	66.049	594	594;281;219;252	0	14.288	0	0	0	13.3	8.9	10.4	69145000	0	0	0	25153000	30041000
O00625	O00625	8	8	8	Pirin	PIR	Pirin	1	8	8	8	0	0	0	7	7	7	0	0	0	7	7	7	0	0	0	7	7	7	42.4	42.4	42.4	32.113	290	290	0	34.992	0	0	0	39.3	29.7	39.7	225460000	0	0	0	90634000	75446000
O00629;H7C4F6	O00629	6;1	6;1	4;1	Importin subunit alpha-3	KPNA4	Importin subunit alpha-3	2	6	6	4	3	2	5	3	2	4	3	2	5	3	2	4	2	2	4	1	1	3	17.1	17.1	12.7	57.886	521	521;170	0	12.333	6.5	5.8	14.4	6.9	5	12.9	52129000	10290000	4985400	15249000	6180300	6046900
O00743;O00743-3;Q5T1S7;O00743-2	O00743;O00743-3;Q5T1S7;O00743-2	2;2;1;1	2;2;1;1	2;2;1;1	Serine/threonine-protein phosphatase 6 catalytic subunit;Serine/threonine-protein phosphatase 6 catalytic subunit, N-terminally processed;Serine/threonine-protein phosphatase	PPP6C	Serine/threonine-protein phosphatase 6 catalytic subunit;Isoform 3 of Serine/threonine-protein phosphatase 6 catalytic subunit;Serine/threonine-protein phosphatase (Fragment);Isoform 2 of Serine/threonine-protein phosphatase 6 catalytic subunit	4	2	2	2	1	0	2	0	0	1	1	0	2	0	0	1	1	0	2	0	0	1	13.4	13.4	13.4	35.144	305	305;342;125;283	0.00074129	7.1032	7.2	0	13.4	0	0	7.2	11503000	3512500	0	4389900	0	0
O14617-4;O14617;O14617-5;O14617-3;O14617-2;A0A087WYN6	O14617-4;O14617;O14617-5;O14617-3;O14617-2	3;3;3;2;2;1	3;3;3;2;2;1	3;3;3;2;2;1	AP-3 complex subunit delta-1	AP3D1	Isoform 4 of AP-3 complex subunit delta-1;AP-3 complex subunit delta-1;Isoform 5 of AP-3 complex subunit delta-1;Isoform 3 of AP-3 complex subunit delta-1;Isoform 2 of AP-3 complex subunit delta-1	6	3	3	3	2	0	3	1	1	1	2	0	3	1	1	1	2	0	3	1	1	1	5.5	5.5	5.5	114.71	1021	1021;1153;1215;984;1112;203	0.00078802	8.5239	4.2	0	5.5	2.2	2.2	2.2	13833000	0	0	4040700	4069100	0
O14656	O14656	1	1	1	Torsin-1A	TOR1A	Torsin-1A	1	1	1	1	0	1	0	0	0	0	0	1	0	0	0	0	0	1	0	0	0	0	3	3	3	37.808	332	332	0.00062775	3.8621	0	3	0	0	0	0	0	0	0	0	0	0
O14773-2;O14773	O14773-2;O14773	7;7	7;7	7;7	Tripeptidyl-peptidase 1	TPP1	Isoform 2 of Tripeptidyl-peptidase 1;Tripeptidyl-peptidase 1	2	7	7	7	4	3	3	7	6	6	4	3	3	7	6	6	4	3	3	7	6	6	42.2	42.2	42.2	34.463	320	320;563	0	75.213	30.3	18.4	18.4	42.2	37.8	37.8	270820000	22279000	13640000	35863000	73342000	56579000
O14818;O14818-2;H0Y586;Q8TAA3-2;Q8TAA3-5;Q8TAA3;A0A087WYS6;O14818-4;F5GY34	O14818;O14818-2;H0Y586;Q8TAA3-2;Q8TAA3-5;Q8TAA3	8;6;5;4;4;4;3;3;1	8;6;5;4;4;4;3;3;1	8;6;5;4;4;4;3;3;1	Proteasome subunit alpha type-7;Proteasome subunit alpha type-7-like	PSMA7;PSMA8	Proteasome subunit alpha type-7;Isoform 2 of Proteasome subunit alpha type-7;Proteasome endopeptidase complex (Fragment);Isoform 2 of Proteasome subunit alpha type-7-like;Isoform 3 of Proteasome subunit alpha type-7-like;Proteasome subunit alpha type-7-lik	9	8	8	8	6	5	6	8	7	7	6	5	6	8	7	7	6	5	6	8	7	7	50	50	50	27.887	248	248;178;187;212;250;256;224;149;63	0	73.158	36.3	30.6	36.3	50	44.4	44.4	284670000	53665000	25010000	45133000	57393000	50781000
Q5VV89;O14880;Q5VV87	Q5VV89;O14880;Q5VV87	2;2;1	2;2;1	2;2;1	Microsomal glutathione S-transferase 3	MGST3	Microsomal glutathione S-transferase 3;Microsomal glutathione S-transferase 3;Microsomal glutathione S-transferase 3	3	2	2	2	1	1	1	0	0	0	1	1	1	0	0	0	1	1	1	0	0	0	31.3	31.3	31.3	18.416	166	166;152;129	0	27.987	15.1	15.1	16.3	0	0	0	12485000	4887700	2630000	4967500	0	0
O14925	O14925	1	1	1	Mitochondrial import inner membrane translocase subunit Tim23	TIMM23	Mitochondrial import inner membrane translocase subunit Tim23	1	1	1	1	0	0	0	1	0	1	0	0	0	1	0	1	0	0	0	1	0	1	10.5	10.5	10.5	21.943	209	209	0.0012384	3.7002	0	0	0	10.5	0	10.5	7628000	0	0	0	4224900	0
O14929-2;O14929	O14929-2;O14929	4;4	4;4	4;4	Histone acetyltransferase type B catalytic subunit	HAT1	Isoform B of Histone acetyltransferase type B catalytic subunit;Histone acetyltransferase type B catalytic subunit	2	4	4	4	0	0	0	3	4	1	0	0	0	3	4	1	0	0	0	3	4	1	22.5	22.5	22.5	39.786	334	334;419	0	15.585	0	0	0	15	22.5	5.4	22560000	0	0	0	7500300	9088700
O14950	O14950	9	9	1	Myosin regulatory light chain 12B	MYL12B	Myosin regulatory light chain 12B	1	9	9	1	8	8	8	8	9	9	8	8	8	8	9	9	0	0	0	1	1	1	79.7	79.7	17.4	19.779	172	172	0	323.31	62.2	62.2	62.2	74.4	79.7	79.7	923720000	139760000	80206000	161160000	180980000	176930000
O14979-3;O14979-2;A0A087WUK2;O14979;A0A087WU03	O14979-3;O14979-2;A0A087WUK2;O14979	9;9;8;8;1	9;9;8;8;1	8;8;7;7;1	Heterogeneous nuclear ribonucleoprotein D-like	HNRNPDL	Isoform 3 of Heterogeneous nuclear ribonucleoprotein D-like;Isoform 2 of Heterogeneous nuclear ribonucleoprotein D-like;Heterogeneous nuclear ribonucleoprotein D-like;Heterogeneous nuclear ribonucleoprotein D-like	5	9	9	8	6	8	7	9	8	9	6	8	7	9	8	9	5	7	6	8	7	8	39.8	39.8	36.5	27.191	244	244;301;363;420;57	0	50.095	36.1	39.3	36.1	39.8	39.3	39.8	366180000	50018000	43443000	69492000	65604000	63251000
O14980;C9JKM9;F8WF71;C9IZS4;C9JQ02;C9JV99;C9J673;C9JF49;C9IYM2;H7BZC5	O14980	15;3;2;2;2;2;2;1;1;1	15;3;2;2;2;2;2;1;1;1	15;3;2;2;2;2;2;1;1;1	Exportin-1	XPO1	Exportin-1	10	15	15	15	5	3	6	10	10	10	5	3	6	10	10	10	5	3	6	10	10	10	21.1	21.1	21.1	123.38	1071	1071;179;82;94;95;100;132;59;62;72	0	62.887	6.7	4.2	8.1	14.7	14.1	13.3	163130000	19822000	7612200	20827000	41091000	44719000
O15067	O15067	2	2	2	Phosphoribosylformylglycinamidine synthase	PFAS	Phosphoribosylformylglycinamidine synthase	1	2	2	2	2	1	1	1	1	1	2	1	1	1	1	1	2	1	1	1	1	1	4.1	4.1	4.1	144.73	1338	1338	0.00074683	7.2968	4.1	1.6	1.6	1.6	1.6	1.6	69837000	23657000	3314400	23572000	3664800	7556300
O15121	O15121	2	2	2	Sphingolipid delta(4)-desaturase DES1	DEGS1	Sphingolipid delta(4)-desaturase DES1	1	2	2	2	1	0	1	1	1	2	1	0	1	1	1	2	1	0	1	1	1	2	9.9	9.9	9.9	37.866	323	323	0.005316	2.9065	5.3	0	5.3	5.3	4.6	9.9	19683000	5616400	0	5177100	2082300	1438000
O15143;C9J4Z7;F8VXW2;C9JEY1;C9JQM8;C9JFG9;C9J6C8;C9JBJ7;C9K057;C9JTT6;C9JM51;F8WEB3	O15143	9;4;4;4;4;4;4;3;3;2;1;1	3;1;1;1;1;1;1;1;1;1;1;1	3;1;1;1;1;1;1;1;1;1;1;1	Actin-related protein 2/3 complex subunit 1B	ARPC1B	Actin-related protein 2/3 complex subunit 1B	12	9	3	3	7	5	6	5	8	7	2	2	2	2	3	3	2	2	2	2	3	3	36	13.2	13.2	40.949	372	372;128;130;130;132;132;132;102;108;82;21;32	0	20.293	28.8	21.8	26.6	20.7	33.9	29	88392000	21236000	3694200	14203000	13007000	17382000
O15144;H7C3F9;G5E9S7;C9JTV5;G5E9J0	O15144	11;5;1;1;1	11;5;1;1;1	11;5;1;1;1	Actin-related protein 2/3 complex subunit 2	ARPC2	Actin-related protein 2/3 complex subunit 2	5	11	11	11	6	7	9	11	10	9	6	7	9	11	10	9	6	7	9	11	10	9	44.3	44.3	44.3	34.333	300	300;165;38;89;91	0	59.662	25	28	37	44.3	37.7	37.7	365320000	51609000	42425000	77667000	66753000	71756000
O15145;C9JZD1;F8VR50	O15145;C9JZD1	6;3;2	6;3;2	6;3;2	Actin-related protein 2/3 complex subunit 3	ARPC3	Actin-related protein 2/3 complex subunit 3;Actin-related protein 2/3 complex subunit 3 (Fragment)	3	6	6	6	5	5	4	4	2	4	5	5	4	4	2	4	5	5	4	4	2	4	47.8	47.8	47.8	20.546	178	178;99;84	0	38.217	40.4	41.6	34.3	34.3	21.9	34.3	163980000	33934000	22506000	28976000	45613000	15348000
O15173;O15173-2;U3KQM0	O15173;O15173-2;U3KQM0	4;4;2	3;3;1	3;3;1	Membrane-associated progesterone receptor component 2	PGRMC2	Membrane-associated progesterone receptor component 2;Isoform 2 of Membrane-associated progesterone receptor component 2;Membrane-associated progesterone receptor component 2	3	4	3	3	3	3	4	4	3	4	2	2	3	3	2	3	2	2	3	3	2	3	26	22	22	23.818	223	223;247;91	0	12.45	16.1	16.1	26	26	16.1	26	64619000	4792600	2202800	19485000	10911000	9539200
Q5T8U5;O15260-2;O15260;O15260-3;B7Z1G8	Q5T8U5;O15260-2;O15260;O15260-3;B7Z1G8	4;4;4;3;2	4;4;4;3;2	4;4;4;3;2	Surfeit locus protein 4	SURF4	Surfeit 4;Isoform 2 of Surfeit locus protein 4;Surfeit locus protein 4;Isoform 3 of Surfeit locus protein 4;Surfeit 4, isoform CRA_b	5	4	4	4	4	3	3	3	3	3	4	3	3	3	3	3	4	3	3	3	3	3	26.9	26.9	26.9	21.127	186	186;159;269;128;226	0	66.933	26.9	19.9	22	22	22	22	132890000	22141000	11967000	39057000	23380000	19175000
O15355	O15355	3	3	3	Protein phosphatase 1G	PPM1G	Protein phosphatase 1G	1	3	3	3	2	1	2	0	0	0	2	1	2	0	0	0	2	1	2	0	0	0	6.2	6.2	6.2	59.271	546	546	0.0007148	6.3002	4.2	2.2	4.2	0	0	0	9211800	6084700	3127100	0	0	0
O15371-2;O15371-3;O15371;B0QYA5;B0QYA4;B0QYA8;B0QYA6	O15371-2;O15371-3;O15371	5;5;5;2;1;1;1	5;5;5;2;1;1;1	5;5;5;2;1;1;1	Eukaryotic translation initiation factor 3 subunit D	EIF3D	Isoform 2 of Eukaryotic translation initiation factor 3 subunit D;Isoform 3 of Eukaryotic translation initiation factor 3 subunit D;Eukaryotic translation initiation factor 3 subunit D	7	5	5	5	4	3	5	0	0	0	4	3	5	0	0	0	4	3	5	0	0	0	14.8	14.8	14.8	58.14	499	499;533;548;269;105;123;173	0	40.528	12.4	9.2	14.8	0	0	0	58931000	16801000	10919000	31211000	0	0
O15400-2;O15400	O15400-2;O15400	2;2	2;2	2;2	Syntaxin-7	STX7	Isoform 2 of Syntaxin-7;Syntaxin-7	2	2	2	2	1	0	1	0	0	0	1	0	1	0	0	0	1	0	1	0	0	0	12.1	12.1	12.1	27.4	239	239;261	0.0006592	4.6029	6.3	0	5.9	0	0	0	0	0	0	0	0	0
O15427;J3QQS9;J3QQV2;J3QSC3;J3KTI8	O15427	3;1;1;1;1	3;1;1;1;1	3;1;1;1;1	Monocarboxylate transporter 4	SLC16A3	Monocarboxylate transporter 4	5	3	3	3	3	3	3	3	2	3	3	3	3	3	2	3	3	3	3	3	2	3	7.3	7.3	7.3	49.469	465	465;235;263;291;306	0	12.044	7.3	7.3	7.3	7.3	5.6	7.3	147660000	19722000	16303000	27965000	32612000	19064000
O15460-2;O15460;E7ENX0;E7EPI9;E7ERI1;C9JX45;A8MXE0;C9JCP0;C9JN43;C9JIG4;C9JFJ1	O15460-2;O15460	20;20;7;7;6;5;5;4;3;3;1	20;20;7;7;6;5;5;4;3;3;1	20;20;7;7;6;5;5;4;3;3;1	Prolyl 4-hydroxylase subunit alpha-2	P4HA2	Isoform IIa of Prolyl 4-hydroxylase subunit alpha-2;Prolyl 4-hydroxylase subunit alpha-2	11	20	20	20	15	16	15	10	11	10	15	16	15	10	11	10	15	16	15	10	11	10	49.2	49.2	49.2	60.632	533	533;535;204;236;184;153;167;146;101;114;50	0	142.09	38.3	40.5	37.7	28.3	30.4	28.9	602240000	128700000	98639000	193210000	66862000	61545000
O15498;O15498-2;H7C3K7	O15498;O15498-2	4;3;1	4;3;1	4;3;1	Synaptobrevin homolog YKT6	YKT6	Synaptobrevin homolog YKT6;Isoform 2 of Synaptobrevin homolog YKT6	3	4	4	4	3	2	2	0	1	2	3	2	2	0	1	2	3	2	2	0	1	2	30.8	30.8	30.8	22.417	198	198;164;29	0	14.088	19.7	19.7	15.2	0	6.6	15.2	39019000	19548000	8988000	6240300	0	2205600
O15511;B1ALC0;O15511-2	O15511;B1ALC0;O15511-2	4;3;3	4;3;3	4;3;3	Actin-related protein 2/3 complex subunit 5	ARPC5	Actin-related protein 2/3 complex subunit 5;Actin-related protein 2/3 complex subunit 5;Isoform 2 of Actin-related protein 2/3 complex subunit 5	3	4	4	4	3	3	4	4	4	3	3	3	4	4	4	3	3	3	4	4	4	3	52.3	52.3	52.3	16.32	151	151;135;154	0	35.315	43.7	43.7	52.3	52.3	52.3	39.7	167900000	31054000	19272000	44632000	27346000	23303000
O43143	O43143	9	9	9	Pre-mRNA-splicing factor ATP-dependent RNA helicase DHX15	DHX15	Pre-mRNA-splicing factor ATP-dependent RNA helicase DHX15	1	9	9	9	4	5	5	6	4	5	4	5	5	6	4	5	4	5	5	6	4	5	16.2	16.2	16.2	90.932	795	795	0	33.136	8.1	9.4	9.6	11.1	7.8	9.8	109850000	12500000	14776000	22481000	25836000	12509000
O43237;O43237-2;J3KRI4;J3KRZ2;B4E2E0;J3KSD2;C9JGM7;C9JLW1	O43237;O43237-2;J3KRI4	9;7;5;3;3;1;1;1	9;7;5;3;3;1;1;1	8;7;5;3;2;1;0;0	Cytoplasmic dynein 1 light intermediate chain 2	DYNC1LI2	Cytoplasmic dynein 1 light intermediate chain 2;Isoform 2 of Cytoplasmic dynein 1 light intermediate chain 2;Cytoplasmic dynein 1 light intermediate chain 2 (Fragment)	8	9	9	8	4	3	4	3	2	6	4	3	4	3	2	6	4	3	4	3	2	5	24.6	24.6	22	54.099	492	492;415;167;92;271;49;190;192	0	30.488	12.4	8.1	9.3	8.7	6.1	19.3	41633000	8601000	6227500	12124000	2840800	0
O43242;O43242-2;F5H8K4;H0YGV8	O43242;O43242-2	13;9;1;1	13;9;1;1	13;9;1;1	26S proteasome non-ATPase regulatory subunit 3	PSMD3	26S proteasome non-ATPase regulatory subunit 3;Isoform 2 of 26S proteasome non-ATPase regulatory subunit 3	4	13	13	13	7	7	8	5	8	8	7	7	8	5	8	8	7	7	8	5	8	8	33.7	33.7	33.7	60.977	534	534;356;86;117	0	55.044	21.9	23.2	22.3	15.4	23.6	24	235880000	40618000	21242000	53110000	33124000	41703000
O43252	O43252	6	6	6	Bifunctional 3-phosphoadenosine 5-phosphosulfate synthase 1;Sulfate adenylyltransferase;Adenylyl-sulfate kinase	PAPSS1	Bifunctional 3-phosphoadenosine 5-phosphosulfate synthase 1	1	6	6	6	0	0	0	4	3	4	0	0	0	4	3	4	0	0	0	4	3	4	14.9	14.9	14.9	70.832	624	624	0	22.408	0	0	0	11.1	9	11.1	91283000	0	0	0	54476000	21192000
O43324;D6RBD7;C9J1V9;O43324-2;D6RCQ0;H0YAL7	O43324;D6RBD7;C9J1V9;O43324-2	3;2;2;2;1;1	3;2;2;2;1;1	3;2;2;2;1;1	Eukaryotic translation elongation factor 1 epsilon-1	EEF1E1;EEF1E1-BLOC1S5	Eukaryotic translation elongation factor 1 epsilon-1;Eukaryotic translation elongation factor 1 epsilon-1;EEF1E1-BLOC1S5 readthrough (NMD candidate);Isoform 2 of Eukaryotic translation elongation factor 1 epsilon-1	6	3	3	3	0	1	0	1	2	2	0	1	0	1	2	2	0	1	0	1	2	2	19	19	19	19.81	174	174;150;151;139;94;136	0.00069204	5.5799	0	5.7	0	5.7	12.1	12.6	16319000	0	0	0	2674000	8698700
O43390;O43390-2;O43390-4;O43390-3;B4DT28;A0A286YEZ8	O43390;O43390-2;O43390-4;O43390-3;B4DT28	20;19;18;17;16;3	20;19;18;17;16;3	16;15;14;14;13;3	Heterogeneous nuclear ribonucleoprotein R	HNRNPR	Heterogeneous nuclear ribonucleoprotein R;Isoform 2 of Heterogeneous nuclear ribonucleoprotein R;Isoform 4 of Heterogeneous nuclear ribonucleoprotein R;Isoform 3 of Heterogeneous nuclear ribonucleoprotein R;Heterogeneous nuclear ribonucleoprotein R	6	20	20	16	13	10	14	15	16	16	13	10	14	15	16	16	9	6	10	11	12	12	38.4	38.4	32.2	70.942	633	633;636;535;595;494;141	0	93.97	25.9	19.3	27.6	28.6	32.2	32.9	679680000	92727000	54299000	114060000	131590000	138830000
O43504	O43504	1	1	1	Ragulator complex protein LAMTOR5	LAMTOR5	Ragulator complex protein LAMTOR5	1	1	1	1	1	1	0	1	0	1	1	1	0	1	0	1	1	1	0	1	0	1	15.4	15.4	15.4	9.6138	91	91	0.00063898	4.126	15.4	15.4	0	15.4	0	15.4	2952200	0	0	0	2952200	0
O43592;F8WDU6;F5GYW6	O43592;F8WDU6	8;4;1	8;4;1	8;4;1	Exportin-T	XPOT	Exportin-T;Exportin-T (Fragment)	3	8	8	8	6	5	6	0	0	0	6	5	6	0	0	0	6	5	6	0	0	0	10.4	10.4	10.4	109.96	962	962;201;60	0	15.859	8	6.7	8.4	0	0	0	34990000	5534100	4559500	24896000	0	0
O43615;M0QXU7	O43615;M0QXU7	2;1	2;1	2;1	Mitochondrial import inner membrane translocase subunit TIM44	TIMM44	Mitochondrial import inner membrane translocase subunit TIM44;Mitochondrial import inner membrane translocase subunit TIM44 (Fragment)	2	2	2	2	0	0	0	0	1	1	0	0	0	0	1	1	0	0	0	0	1	1	5.3	5.3	5.3	51.355	452	452;273	0.00066269	4.7373	0	0	0	0	2.4	2.9	3030100	0	0	0	0	0
O43707;O43707-2;F5GXS2;O43707-3;H7C144;K7EJH8;K7EP19	O43707;O43707-2;F5GXS2;O43707-3	51;38;28;28;19;6;2	51;38;28;28;19;6;2	35;29;23;23;15;5;1	Alpha-actinin-4	ACTN4	Alpha-actinin-4;Isoform ACTN4ISO of Alpha-actinin-4;Alpha-actinin-4;Isoform 3 of Alpha-actinin-4	7	51	51	35	44	43	43	48	48	47	44	43	43	48	48	47	28	27	27	32	32	31	71	71	51.6	104.85	911	911;692;521;521;342;182;105	0	323.31	63.2	59.8	60.3	67.3	68.3	68.3	5919300000	925220000	537540000	1310800000	1103500000	978430000
O43747;O43747-2;B3KNW1	O43747;O43747-2	3;3;1	3;3;1	3;3;1	AP-1 complex subunit gamma-1	AP1G1	AP-1 complex subunit gamma-1;Isoform 2 of AP-1 complex subunit gamma-1	3	3	3	3	1	0	1	2	3	2	1	0	1	2	3	2	1	0	1	2	3	2	5.6	5.6	5.6	91.35	822	822;825;247	0.00072307	6.5092	1.1	0	1.2	4.5	5.6	4.5	29631000	0	0	4969000	7819000	8465400
O43765;K7EMD6	O43765;K7EMD6	5;3	5;3	5;3	Small glutamine-rich tetratricopeptide repeat-containing protein alpha	SGTA	Small glutamine-rich tetratricopeptide repeat-containing protein alpha;Small glutamine-rich tetratricopeptide repeat-containing protein alpha (Fragment)	2	5	5	5	2	1	2	4	2	4	2	1	2	4	2	4	2	1	2	4	2	4	19.8	19.8	19.8	34.063	313	313;162	0	17.695	8.3	3.8	8.3	16	8.3	15	14255000	0	1307300	0	3848300	3347800
O43776;K7EIU7;K7EPK2;K7EQ35;O43776-2;K7EMQ6;K7EJ19	O43776	9;2;2;2;2;1;1	9;2;2;2;2;1;1	9;2;2;2;2;1;1	Asparagine--tRNA ligase, cytoplasmic	NARS	Asparagine--tRNA ligase, cytoplasmic	7	9	9	9	1	1	2	5	5	6	1	1	2	5	5	6	1	1	2	5	5	6	22.1	22.1	22.1	62.942	548	548;162;163;167;174;128;136	0	42.459	2.7	4.2	4.7	15	12.6	15.3	85987000	6004100	3585400	10450000	19078000	12497000
O43809;H3BND3;H3BV41	O43809;H3BND3;H3BV41	7;6;4	7;6;4	7;6;4	Cleavage and polyadenylation specificity factor subunit 5	NUDT21	Cleavage and polyadenylation specificity factor subunit 5;Cleavage and polyadenylation-specificity factor subunit 5 (Fragment);Cleavage and polyadenylation-specificity factor subunit 5 (Fragment)	3	7	7	7	4	2	1	5	5	4	4	2	1	5	5	4	4	2	1	5	5	4	44.9	44.9	44.9	26.227	227	227;149;71	0	28.951	23.8	16.7	4	35.7	39.6	35.7	126660000	13082000	7953100	6367300	25843000	37782000
O43813;E9PHS0	O43813;E9PHS0	3;2	3;2	3;2	LanC-like protein 1	LANCL1	LanC-like protein 1;LanC-like protein 1 (Fragment)	2	3	3	3	0	0	0	3	3	1	0	0	0	3	3	1	0	0	0	3	3	1	16.3	16.3	16.3	45.283	399	399;196	0	27.914	0	0	0	16.3	16.3	5.5	59884000	0	0	0	23838000	21030000
O43852;O43852-3;O43852-5;O43852-6;O43852-9;O43852-15;O43852-10;H0Y875;O43852-13;O43852-14;O43852-11;O43852-12	O43852;O43852-3;O43852-5;O43852-6;O43852-9;O43852-15;O43852-10;H0Y875	21;21;15;15;12;12;12;11;9;9;9;4	21;21;15;15;12;12;12;11;9;9;9;4	5;5;5;5;2;0;5;0;5;5;5;0	Calumenin	CALU	Calumenin;Isoform 3 of Calumenin;Isoform 5 of Calumenin;Isoform 6 of Calumenin;Isoform 9 of Calumenin;Isoform 15 of Calumenin;Isoform 10 of Calumenin;Calumenin (Fragment)	12	21	21	5	18	18	19	16	13	11	18	18	19	16	13	11	4	3	4	3	3	2	73	73	13.7	37.106	315	315;323;229;265;154;164;224;147;139;147;170;74	0	323.31	65.7	69.2	71.7	66	61	55.2	2570600000	613410000	319890000	832100000	324380000	242460000
O43852-2;O43852-4;O43852-8;O43852-7	O43852-2;O43852-4;O43852-8	19;19;10;7	3;3;3;3	3;3;3;3	Calumenin	CALU	Isoform 2 of Calumenin;Isoform 4 of Calumenin;Isoform 8 of Calumenin	4	19	3	3	17	18	18	14	10	10	3	3	3	1	0	1	3	3	3	1	0	1	74.9	15.6	15.6	37.134	315	315;323;201;161	0	22.224	70.2	74.9	74.9	59.7	48.6	56.2	80956000	20817000	18506000	37798000	0	0
O43865-2;O43865;H0Y8B3;Q96HN2-4;Q96HN2-3;Q96HN2-2;Q96HN2	O43865-2;O43865;H0Y8B3;Q96HN2-4;Q96HN2-3;Q96HN2-2;Q96HN2	3;3;2;2;2;2;2	3;3;2;2;2;2;2	3;3;2;2;2;2;2	Putative adenosylhomocysteinase 2;Adenosylhomocysteinase;Putative adenosylhomocysteinase 3	AHCYL1;AHCYL2	Isoform 2 of S-adenosylhomocysteine hydrolase-like protein 1;S-adenosylhomocysteine hydrolase-like protein 1;Adenosylhomocysteinase (Fragment);Isoform 4 of Adenosylhomocysteinase 3;Isoform 3 of Adenosylhomocysteinase 3;Isoform 2 of Adenosylhomocysteinase 3	7	3	3	3	0	0	0	1	3	2	0	0	0	1	3	2	0	0	0	1	3	2	8.9	8.9	8.9	53.753	483	483;530;518;508;508;610;611	0	10.24	0	0	0	2.9	8.9	7.2	22177000	0	0	0	0	9970800
O60218	O60218	20	20	11	Aldo-keto reductase family 1 member B10	AKR1B10	Aldo-keto reductase family 1 member B10	1	20	20	11	1	0	0	15	17	18	1	0	0	15	17	18	0	0	0	8	11	11	67.7	67.7	38	36.019	316	316	0	320.42	5.1	0	0	61.7	62.7	62.7	2049300000	6251800	0	0	663770000	654540000
O60361	O60361	9	1	1	Putative nucleoside diphosphate kinase	NME2P1	Putative nucleoside diphosphate kinase	1	9	1	1	7	7	7	8	8	7	1	0	1	0	1	0	1	0	1	0	1	0	66.4	7.3	7.3	15.529	137	137	1	-2	59.9	59.1	59.9	59.1	66.4	59.1	16404000	2491000	0	5872900	0	8040400
O60488-2;O60488;H0Y9A0	O60488-2;O60488	5;5;2	4;4;2	4;4;2	Long-chain-fatty-acid--CoA ligase 4	ACSL4	Isoform Short of Long-chain-fatty-acid--CoA ligase 4;Long-chain-fatty-acid--CoA ligase 4	3	5	4	4	3	1	4	2	2	1	2	1	3	1	1	0	2	1	3	1	1	0	11.2	8.5	8.5	74.435	670	670;711;156	0	8.9944	8.1	3.1	9	5.8	5.8	2.7	113950000	6379300	5494400	87543000	5003700	9525900
O60493;O60493-4;O60493-2;O60493-3	O60493;O60493-4;O60493-2	6;5;4;2	6;5;4;2	5;5;4;1	Sorting nexin-3	SNX3	Sorting nexin-3;Isoform 4 of Sorting nexin-3;Isoform 2 of Sorting nexin-3	4	6	6	5	4	3	5	0	0	1	4	3	5	0	0	1	3	3	5	0	0	1	37.7	37.7	33.3	18.762	162	162;140;130;113	0	12.517	24.1	19.1	33.3	0	0	4.9	52799000	21583000	10567000	19544000	0	0
O60506-3;O60506;O60506-4;O60506-2;B7Z645;O60506-5;F6UXX1	O60506-3;O60506;O60506-4;O60506-2;B7Z645;O60506-5	16;16;15;15;14;12;5	12;12;11;11;10;9;4	12;12;11;11;10;9;4	Heterogeneous nuclear ribonucleoprotein Q	SYNCRIP	Isoform 3 of Heterogeneous nuclear ribonucleoprotein Q;Heterogeneous nuclear ribonucleoprotein Q;Isoform 4 of Heterogeneous nuclear ribonucleoprotein Q;Isoform 2 of Heterogeneous nuclear ribonucleoprotein Q;Heterogeneous nuclear ribonucleoprotein Q;Isoform	7	16	12	12	12	12	12	13	13	14	8	8	8	9	9	10	8	8	8	9	9	10	39.3	32.4	32.4	62.656	562	562;623;527;588;464;410;185	0	101.55	31.9	31.9	30.4	33.1	30.1	35.6	513710000	65454000	58292000	106930000	78439000	96792000
Q5VUC6;O60551	Q5VUC6;O60551	2;2	1;1	1;1	Glycylpeptide N-tetradecanoyltransferase;Glycylpeptide N-tetradecanoyltransferase 2	NMT2	Glycylpeptide N-tetradecanoyltransferase;Glycylpeptide N-tetradecanoyltransferase 2	2	2	1	1	0	1	0	0	1	2	0	0	0	0	1	1	0	0	0	0	1	1	7.8	3.9	3.9	56.716	485	485;498	0.0052972	2.8638	0	3.9	0	0	3.9	7.8	4342800	0	0	0	0	1614500
O60568;H7C2S8;H7C2V1;H7C0B8;C9JU11	O60568;H7C2S8	6;3;2;1;1	6;3;2;1;1	6;3;2;1;1	Procollagen-lysine,2-oxoglutarate 5-dioxygenase 3	PLOD3	Procollagen-lysine,2-oxoglutarate 5-dioxygenase 3;Procollagen-lysine,2-oxoglutarate 5-dioxygenase 3 (Fragment)	5	6	6	6	1	1	1	3	2	4	1	1	1	3	2	4	1	1	1	3	2	4	12.2	12.2	12.2	84.784	738	738;264;270;66;171	0	20.386	2.8	1.4	3.5	7.5	3.9	8	35855000	3839100	0	5489000	11024000	5444300
O60664-4;O60664;O60664-3;K7ERZ3;K7EL96;O60664-2;K7ER39	O60664-4;O60664;O60664-3;K7ERZ3	17;17;16;11;8;8;6	17;17;16;11;8;8;6	17;17;16;11;8;8;6	Perilipin-3	PLIN3	Isoform 4 of Perilipin-3;Perilipin-3;Isoform 3 of Perilipin-3;Perilipin-3 (Fragment)	7	17	17	17	13	13	14	15	13	14	13	13	14	15	13	14	13	13	14	15	13	14	62.1	62.1	62.1	45.803	422	422;434;433;292;172;251;168	0	284.31	47.4	50.9	53.3	56.2	50.9	56.9	756290000	119470000	88749000	205890000	109570000	112830000
Q5TFJ7;O60684	Q5TFJ7;O60684	1;1	1;1	1;1	Importin subunit alpha-7	KPNA6	Importin subunit alpha-7 (Fragment);Importin subunit alpha-7	2	1	1	1	0	0	1	0	0	0	0	0	1	0	0	0	0	0	1	0	0	0	5.6	5.6	5.6	35.457	321	321;536	0.00066007	4.6468	0	0	5.6	0	0	0	3762700	0	0	3762700	0	0
O60701;O60701-2;O60701-3;E7ER83;E7ETF4;E7EV97;E7ER95;D6RHF4;E9PBD2	O60701;O60701-2;O60701-3	17;15;13;5;5;5;3;1;1	17;15;13;5;5;5;3;1;1	17;15;13;5;5;5;3;1;1	UDP-glucose 6-dehydrogenase	UGDH	UDP-glucose 6-dehydrogenase;Isoform 2 of UDP-glucose 6-dehydrogenase;Isoform 3 of UDP-glucose 6-dehydrogenase	9	17	17	17	6	5	6	15	11	9	6	5	6	15	11	9	6	5	6	15	11	9	46.8	46.8	46.8	55.023	494	494;427;397;130;153;181;84;53;55	0	94.557	16.8	14.2	17	42.3	27.9	20.9	241230000	11807000	7756900	25654000	90386000	59527000
O60711;O60711-2;E9PNX9;B7Z5P7	O60711;O60711-2;E9PNX9;B7Z5P7	3;3;2;2	3;3;2;2	3;3;2;2	Leupaxin	LPXN	Leupaxin;Isoform 2 of Leupaxin;Leupaxin;Leupaxin	4	3	3	3	3	2	3	0	0	0	3	2	3	0	0	0	3	2	3	0	0	0	17.1	17.1	17.1	43.332	386	386;391;106;366	0	27.717	17.1	11.4	17.1	0	0	0	31190000	14102000	7289800	9798400	0	0
O60763;O60763-2	O60763;O60763-2	5;5	5;5	5;5	General vesicular transport factor p115	USO1	General vesicular transport factor p115;Isoform 2 of General vesicular transport factor p115	2	5	5	5	3	2	3	0	1	2	3	2	3	0	1	2	3	2	3	0	1	2	8	8	8	107.89	962	962;973	0	13.513	5.1	2.8	4.9	0	1.8	3.1	16878000	5939700	2233000	5083100	0	0
U3KQK0;Q99880;Q99879;Q99877;Q93079;Q5QNW6;P62807;P58876;P57053;O60814;Q5QNW6-2;Q96A08	U3KQK0;Q99880;Q99879;Q99877;Q93079;Q5QNW6;P62807;P58876;P57053;O60814;Q5QNW6-2;Q96A08	6;6;6;6;6;6;6;6;6;6;6;3	6;6;6;6;6;6;6;6;6;6;6;3	2;2;2;2;2;2;2;2;2;2;2;0	Histone H2B;Histone H2B type 1-L;Histone H2B type 1-M;Histone H2B type 1-N;Histone H2B type 1-H;Histone H2B type 2-F;Histone H2B type 1-C/E/F/G/I;Histone H2B type 1-D;Histone H2B type F-S;Histone H2B type 1-K;Histone H2B type 1-A	HIST1H2BN;HIST1H2BL;HIST1H2BM;HIST1H2BH;HIST2H2BF;HIST1H2BC;HIST1H2BD;H2BFS;HIST1H2BK;HIST1H2BA	Histone H2B;Histone H2B type 1-L;Histone H2B type 1-M;Histone H2B type 1-N;Histone H2B type 1-H;Histone H2B type 2-F;Histone H2B type 1-C/E/F/G/I;Histone H2B type 1-D;Histone H2B type F-S;Histone H2B type 1-K;Isoform 2 of Histone H2B type 2-F;Histone H2B t	12	6	6	2	5	5	6	6	6	6	5	5	6	6	6	6	2	2	2	2	2	2	31.3	31.3	6	18.804	166	166;126;126;126;126;126;126;126;126;126;134;127	0	79.797	27.1	27.1	31.3	31.3	31.3	31.3	15085000000	1751500000	929390000	1520300000	4936700000	3276500000
O60869-2;O60869-3;O60869	O60869-2;O60869-3;O60869	3;3;3	3;3;3	3;3;3	Endothelial differentiation-related factor 1	EDF1	Isoform 2 of Endothelial differentiation-related factor 1;Isoform 3 of Endothelial differentiation-related factor 1;Endothelial differentiation-related factor 1	3	3	3	3	3	2	2	0	1	2	3	2	2	0	1	2	3	2	2	0	1	2	26.6	26.6	26.6	15.48	139	139;141;148	0.0006605	4.6478	26.6	18	18	0	7.2	15.8	56096000	26816000	3506400	9098200	0	1893700
O60884;A0A087WT48	O60884	3;1	3;1	3;1	DnaJ homolog subfamily A member 2	DNAJA2	DnaJ homolog subfamily A member 2	2	3	3	3	2	0	2	2	3	1	2	0	2	2	3	1	2	0	2	2	3	1	13.1	13.1	13.1	45.745	412	412;134	0	32.899	11.2	0	11.2	11.2	13.1	3.2	27209000	7580900	0	9440100	5740800	4447100
O60888-3;C9IZG4;O60888;O60888-2;C9IZQ5	O60888-3;C9IZG4;O60888;O60888-2	4;3;3;3;1	4;3;3;3;1	4;3;3;3;1	Protein CutA	CUTA	Isoform C of Protein CutA;Protein CutA;Protein CutA;Isoform A of Protein CutA	5	4	4	4	1	1	0	2	2	3	1	1	0	2	2	3	1	1	0	2	2	3	43.6	43.6	43.6	16.832	156	156;135;179;198;155	0	35.291	17.3	5.8	0	20.5	26.3	37.8	69818000	7804700	4240000	0	3156900	30376000
O75083;O75083-3;D6RD66	O75083;O75083-3	25;17;9	25;17;9	25;17;9	WD repeat-containing protein 1	WDR1	WD repeat-containing protein 1;Isoform 2 of WD repeat-containing protein 1	3	25	25	25	21	21	23	14	15	16	21	21	23	14	15	16	21	21	23	14	15	16	64	64	64	66.193	606	606;466;245	0	306.11	54.5	53.1	60.7	45.2	46.5	46.9	1401700000	303210000	189080000	374670000	198230000	135490000
O75131;A0A087WYQ3;E5RHZ0;A0A087WXR6;A0A087WUS8;H0YB26;E5RFT7;E7ENV7;Q86YQ8-2;Q9HCH3-2;Q96FN4-2;Q96FN4;Q8IYJ1;Q96A23;O95741;Q9UBL6-2;Q86YQ8;Q96A23-2;Q9HCH3;O95741-2;Q9UBL6	O75131;A0A087WYQ3;E5RHZ0	11;7;6;5;4;4;3;1;1;1;1;1;1;1;1;1;1;1;1;1;1	11;7;6;5;4;4;3;1;1;1;1;1;1;1;1;1;1;1;1;1;1	11;7;6;5;4;4;3;1;1;1;1;1;1;1;1;1;1;1;1;1;1	Copine-3	CPNE3	Copine-3;Copine-3 (Fragment);Copine-3 (Fragment)	21	11	11	11	7	6	9	4	2	3	7	6	9	4	2	3	7	6	9	4	2	3	29.2	29.2	29.2	60.13	537	537;234;153;139;135;262;79;552;233;301;446;548;553;557;557;558;564;575;593;612;633	0	63.476	18.8	16.2	24.8	13.4	3.4	12.7	148730000	27324000	20035000	56571000	20362000	7599900
O75340-2;O75340;A0A024QZ42;H0Y9X3;A0A087WZ38	O75340-2;O75340;A0A024QZ42	4;4;3;1;1	4;4;3;1;1	4;4;3;1;1	Programmed cell death protein 6	PDCD6	Isoform 2 of Programmed cell death protein 6;Programmed cell death protein 6;HCG1985580, isoform CRA_c	5	4	4	4	4	2	2	3	3	2	4	2	2	3	3	2	4	2	2	3	3	2	22.2	22.2	22.2	21.664	189	189;191;121;104;123	0	10.007	22.2	12.7	10.1	16.9	15.3	10.1	66643000	8883900	6818300	22364000	14892000	12096000
O75348;F2Z307;O95670-2;O95670	O75348	4;1;1;1	4;1;1;1	4;1;1;1	V-type proton ATPase subunit G 1	ATP6V1G1	V-type proton ATPase subunit G 1	4	4	4	4	4	2	2	2	3	4	4	2	2	2	3	4	4	2	2	2	3	4	41.5	41.5	41.5	13.757	118	118;99;78;118	0	16.599	41.5	20.3	21.2	16.9	29.7	41.5	30244000	5492000	696690	5743700	4354600	7209000
O75351;K7EL71;K7EKZ3;I3L4J1;Q9UN37	O75351;K7EL71;K7EKZ3;I3L4J1;Q9UN37	2;1;1;1;1	2;1;1;1;1	2;1;1;1;1	Vacuolar protein sorting-associated protein 4B;Vacuolar protein sorting-associated protein 4A	VPS4B;VPS4A	Vacuolar protein sorting-associated protein 4B;Vacuolar protein sorting-associated protein 4B;Vacuolar protein sorting-associated protein 4B;Uncharacterized protein (Fragment);Vacuolar protein sorting-associated protein 4A	5	2	2	2	0	0	0	2	1	1	0	0	0	2	1	1	0	0	0	2	1	1	7	7	7	49.301	444	444;111;128;428;437	0.0012438	3.7476	0	0	0	7	5.2	5.2	11161000	0	0	0	3838400	3803600
O75367-2;O75367-3;O75367;B4DJC3;D6RCF2;Q9P0M6;Q5SQT3	O75367-2;O75367-3;O75367;B4DJC3	14;14;14;9;5;2;1	14;14;14;9;5;2;1	14;14;14;9;5;2;1	Core histone macro-H2A.1;Histone H2A	H2AFY	Isoform 1 of Core histone macro-H2A.1;Isoform 3 of Core histone macro-H2A.1;Core histone macro-H2A.1;Histone H2A	7	14	14	14	4	6	6	11	11	12	4	6	6	11	11	12	4	6	6	11	11	12	45.3	45.3	45.3	39.183	369	369;371;372;200;165;372;242	0	68.333	19.2	26.3	24.7	35.8	37.1	41.7	369480000	15546000	16074000	33535000	85643000	99752000
O75368	O75368	5	5	5	SH3 domain-binding glutamic acid-rich-like protein	SH3BGRL	SH3 domain-binding glutamic acid-rich-like protein	1	5	5	5	2	2	2	4	2	4	2	2	2	4	2	4	2	2	2	4	2	4	54.4	54.4	54.4	12.774	114	114	0	17.433	27.2	21.9	21.9	53.5	27.2	38.6	67356000	10697000	0	10545000	24596000	4909500
O75369-2;O75369-9;O75369;O75369-8;O75369-6;O75369-3;E7EN95;O75369-7;O75369-5;O75369-4;H7C5L4;A0A0A0MT44;A0A0C4DGA1	O75369-2;O75369-9;O75369;O75369-8;O75369-6;O75369-3;E7EN95;O75369-7;O75369-5;O75369-4	96;96;96;95;93;93;86;86;79;79;4;3;2	86;86;86;85;83;83;83;83;70;70;4;3;2	86;86;86;85;83;83;83;83;70;70;4;3;2	Filamin-B	FLNB	Isoform 2 of Filamin-B;Isoform 9 of Filamin-B;Filamin-B;Isoform 8 of Filamin-B;Isoform 6 of Filamin-B;Isoform 3 of Filamin-B;Filamin-B;Isoform 7 of Filamin-B;Isoform 5 of Filamin-B;Isoform 4 of Filamin-B	13	96	86	86	66	51	69	73	71	66	57	42	59	64	62	59	57	42	59	64	62	59	58.8	54.5	54.5	275.66	2578	2578;2591;2602;2633;2537;2561;2409;2422;2146;2150;135;195;72	0	323.31	39.8	30.5	43.4	46.5	45	41.2	3338100000	524280000	244700000	659780000	688260000	600530000
O75396;A0A087X1A9	O75396	5;2	5;2	5;2	Vesicle-trafficking protein SEC22b	SEC22B	Vesicle-trafficking protein SEC22b	2	5	5	5	5	4	4	5	5	5	5	4	4	5	5	5	5	4	4	5	5	5	31.6	31.6	31.6	24.593	215	215;79	0	111.68	31.6	26	25.6	31.6	31.6	31.6	128600000	38731000	9828300	10862000	30917000	15836000
O75436;S4R3Q6;O75436-2	O75436;S4R3Q6;O75436-2	3;2;2	3;2;2	3;2;2	Vacuolar protein sorting-associated protein 26A	VPS26A	Vacuolar protein sorting-associated protein 26A;Vacuolar protein sorting-associated protein 26A;Isoform 2 of Vacuolar protein sorting-associated protein 26A	3	3	3	3	1	2	1	1	0	0	1	2	1	1	0	0	1	2	1	1	0	0	13.1	13.1	13.1	38.169	327	327;226;251	0.00070522	5.9157	5.5	9.5	4	3.7	0	0	14762000	0	2962800	8047000	3752300	0
O75475;O75475-3;O75475-2	O75475;O75475-3;O75475-2	5;4;4	4;3;3	4;3;3	PC4 and SFRS1-interacting protein	PSIP1	PC4 and SFRS1-interacting protein;Isoform 3 of PC4 and SFRS1-interacting protein;Isoform 2 of PC4 and SFRS1-interacting protein	3	5	4	4	4	2	2	3	4	3	3	1	1	2	3	2	3	1	1	2	3	2	10	8.5	8.5	60.103	530	530;329;333	0	18.57	7.9	4.7	4.7	6.8	8.3	6.8	49821000	8118000	3015700	6501500	10206000	11086000
O75477;B0QZ43	O75477;B0QZ43	5;3	5;3	3;1	Erlin-1	ERLIN1	Erlin-1;Erlin-1 (Fragment)	2	5	5	3	4	2	4	1	3	1	4	2	4	1	3	1	3	1	2	0	1	0	18.2	18.2	11.3	38.925	346	346;275	0	21.678	14.7	7.5	15.6	3.5	9.5	3.5	50007000	22017000	3858200	18542000	0	4031600
O75489;E9PS48;O75489-2;G3V194	O75489;E9PS48;O75489-2	6;3;3;2	6;3;3;2	6;3;3;2	NADH dehydrogenase [ubiquinone] iron-sulfur protein 3, mitochondrial	NDUFS3	NADH dehydrogenase [ubiquinone] iron-sulfur protein 3, mitochondrial;NADH dehydrogenase [ubiquinone] iron-sulfur protein 3, mitochondrial;Isoform 2 of NADH dehydrogenase [ubiquinone] iron-sulfur protein 3, mitochondrial	4	6	6	6	1	0	1	3	2	3	1	0	1	3	2	3	1	0	1	3	2	3	25.8	25.8	25.8	30.241	264	264;161;132;121	0	15.905	4.9	0	6.4	15.9	11.4	11.7	61975000	947810	0	0	36470000	3193100
Q5JRI1;O75494-5;O75494-4;O75494-6;O75494-3;O75494-2;O75494;Q6IQ42;R4GMP8;Q8WXF0	Q5JRI1;O75494-5;O75494-4;O75494-6;O75494-3;O75494-2;O75494;Q6IQ42	4;4;4;4;4;4;4;2;1;1	4;4;4;4;4;4;4;2;1;1	4;4;4;4;4;4;4;2;1;1	Serine/arginine-rich splicing factor 10	SRSF10;FUSIP1	Serine/arginine-rich-splicing factor 10;Isoform 5 of Serine/arginine-rich splicing factor 10;Isoform 4 of Serine/arginine-rich splicing factor 10;Isoform 6 of Serine/arginine-rich splicing factor 10;Isoform 3 of Serine/arginine-rich splicing factor 10;Isof	10	4	4	4	3	2	1	1	2	1	3	2	1	1	2	1	3	2	1	1	2	1	29.1	29.1	29.1	20.913	172	172;165;173;182;183;261;262;69;40;261	0	9.4994	19.8	15.7	6.4	6.4	13.4	6.4	28826000	8486100	0	3412800	5898500	7826200
O75531	O75531	3	3	3	Barrier-to-autointegration factor;Barrier-to-autointegration factor, N-terminally processed	BANF1	Barrier-to-autointegration factor	1	3	3	3	3	3	3	2	3	3	3	3	3	2	3	3	3	3	3	2	3	3	48.3	48.3	48.3	10.058	89	89	0	32.385	48.3	48.3	48.3	34.8	48.3	48.3	362100000	63274000	37174000	85156000	56406000	62724000
O75533;H7C341	O75533	15;1	15;1	15;1	Splicing factor 3B subunit 1	SF3B1	Splicing factor 3B subunit 1	2	15	15	15	3	1	4	10	7	11	3	1	4	10	7	11	3	1	4	10	7	11	20.3	20.3	20.3	145.83	1304	1304;241	0	54.294	3.9	1.4	5.3	13.1	9.1	14.8	185740000	7907300	1931900	8241400	94419000	33377000
O75534-2;O75534;O75534-3;O75534-4;E9PLT0;E9PKN4;E9PLD4;E9PNG3	O75534-2;O75534;O75534-3;O75534-4;E9PLT0	7;7;7;7;6;1;1;1	7;7;7;7;6;1;1;1	7;7;7;7;6;1;1;1	Cold shock domain-containing protein E1	CSDE1	Isoform 2 of Cold shock domain-containing protein E1;Cold shock domain-containing protein E1;Isoform 3 of Cold shock domain-containing protein E1;Isoform 4 of Cold shock domain-containing protein E1;Cold shock domain-containing protein E1	8	7	7	7	2	1	4	3	4	3	2	1	4	3	4	3	2	1	4	3	4	3	12	12	12	85.746	767	767;798;813;844;668;46;94;136	0	31.727	3.3	1.4	6.6	6.3	7.7	4.6	41953000	4340500	1371500	5079300	8981300	12167000
O75569-3;O75569-2;O75569;F8WEG8;G5E9Q4;C9JMM3	O75569-3;O75569-2;O75569;F8WEG8;G5E9Q4;C9JMM3	4;4;4;2;2;2	4;4;4;2;2;2	4;4;4;2;2;2	Interferon-inducible double-stranded RNA-dependent protein kinase activator A	PRKRA	Isoform 3 of Interferon-inducible double-stranded RNA-dependent protein kinase activator A;Isoform 2 of Interferon-inducible double-stranded RNA-dependent protein kinase activator A;Interferon-inducible double-stranded RNA-dependent protein kinase activato	6	4	4	4	0	1	1	3	4	3	0	1	1	3	4	3	0	1	1	3	4	3	21.9	21.9	21.9	31.635	288	288;302;313;95;105;108	0	22.659	0	6.6	6.6	18.4	21.9	18.4	63891000	0	4265700	4762200	21581000	19475000
O75643;O75643-2;B4E0P5	O75643	17;8;3	17;8;3	17;8;3	U5 small nuclear ribonucleoprotein 200 kDa helicase	SNRNP200	U5 small nuclear ribonucleoprotein 200 kDa helicase	3	17	17	17	1	1	4	8	9	11	1	1	4	8	9	11	1	1	4	8	9	11	13.2	13.2	13.2	244.5	2136	2136;625;595	0	63.56	0.6	0.5	3.1	5.6	7	8.6	71962000	0	5074300	12160000	7534400	22273000
O75663;O75663-2	O75663;O75663-2	3;2	3;2	3;2	TIP41-like protein	TIPRL	TIP41-like protein;Isoform 2 of TIP41-like protein	2	3	3	3	1	0	0	2	3	2	1	0	0	2	3	2	1	0	0	2	3	2	19.9	19.9	19.9	31.444	272	272;178	0	14.432	9.2	0	0	12.1	19.9	16.9	39395000	4252100	0	0	10383000	12439000
O75718;C9JP16;Q92791	O75718;C9JP16	9;7;1	9;7;1	9;7;1	Cartilage-associated protein	CRTAP	Cartilage-associated protein;Cartilage-associated protein	3	9	9	9	1	0	2	6	8	7	1	0	2	6	8	7	1	0	2	6	8	7	25.7	25.7	25.7	46.561	401	401;358;437	0	25.992	3.7	0	7	17.5	22.4	20	72276000	2219100	0	0	19292000	10797000
O75821;K7ENA8;K7EL20;K7ER90;K7EP16;K7EL60	O75821;K7ENA8;K7EL20;K7ER90	7;6;5;4;3;1	7;6;5;4;3;1	7;6;5;4;3;1	Eukaryotic translation initiation factor 3 subunit G	EIF3G	Eukaryotic translation initiation factor 3 subunit G;Eukaryotic translation initiation factor 3 subunit G (Fragment);Eukaryotic translation initiation factor 3 subunit G (Fragment);Eukaryotic translation initiation factor 3 subunit G (Fragment)	6	7	7	7	4	3	6	5	6	6	4	3	6	5	6	6	4	3	6	5	6	6	26.9	26.9	26.9	35.611	320	320;289;262;227;118;149	0	28.062	16.2	13.4	19.1	19.1	26.9	19.1	141170000	17112000	7277000	38483000	27050000	29715000
O75828	O75828	4	2	2	Carbonyl reductase [NADPH] 3	CBR3	Carbonyl reductase [NADPH] 3	1	4	2	2	3	3	2	3	3	3	1	1	0	1	1	1	1	1	0	1	1	1	17.7	7.2	7.2	30.85	277	277	0	10.054	13.4	13.4	10.5	14.8	14.8	14.8	5056700	0	0	0	0	0
O75844	O75844	4	4	4	CAAX prenyl protease 1 homolog	ZMPSTE24	CAAX prenyl protease 1 homolog	1	4	4	4	3	3	3	1	1	1	3	3	3	1	1	1	3	3	3	1	1	1	15.2	15.2	15.2	54.812	475	475	0	24.642	10.9	10.9	11.8	3.4	5.3	5.3	67492000	12096000	5565300	18462000	2612000	8002500
O75874;C9J4N6;C9JJE5;C9JLU6	O75874	14;4;2;2	13;3;2;2	13;3;2;2	Isocitrate dehydrogenase [NADP] cytoplasmic	IDH1	Isocitrate dehydrogenase [NADP] cytoplasmic	4	14	13	13	7	5	7	13	14	11	6	4	6	12	13	10	6	4	6	12	13	10	38.2	36	36	46.659	414	414;157;62;73	0	80.199	21.3	16.4	21.3	38.2	38.2	30.9	260530000	21256000	8091700	19505000	82830000	77716000
O75915;F8WF90;C9JQU6;F8WF33	O75915;F8WF90;C9JQU6;F8WF33	3;2;2;2	3;2;2;2	3;2;2;2	PRA1 family protein 3	ARL6IP5	PRA1 family protein 3;PRA1 family protein;PRA1 family protein;PRA1 family protein	4	3	3	3	2	2	2	1	1	1	2	2	2	1	1	1	2	2	2	1	1	1	20.7	20.7	20.7	21.614	188	188;59;88;93	0	24.465	16	16	14.9	10.1	10.1	10.1	31917000	8715800	5836600	6661700	3885200	3018700
O75937;S4R3J5	O75937	3;1	3;1	3;1	DnaJ homolog subfamily C member 8	DNAJC8	DnaJ homolog subfamily C member 8	2	3	3	3	0	0	0	2	0	1	0	0	0	2	0	1	0	0	0	2	0	1	15.8	15.8	15.8	29.841	253	253;106	0.00067889	5.2049	0	0	0	15.8	0	10.3	3608300	0	0	0	0	0
O75947;O75947-2;F5H608	O75947;O75947-2;F5H608	5;4;3	5;4;3	5;4;3	ATP synthase subunit d, mitochondrial	ATP5H	ATP synthase subunit d, mitochondrial;Isoform 2 of ATP synthase subunit d, mitochondrial;ATP synthase peripheral stalk subunit d	3	5	5	5	2	2	2	5	2	4	2	2	2	5	2	4	2	2	2	5	2	4	43.5	43.5	43.5	18.491	161	161;137;81	0	28.321	18.6	18.6	18.6	43.5	18.6	32.9	421100000	9200900	1840700	0	212710000	23283000
O75962-2;O75962-4;O75962;E7EWP2;O75962-5;E7EPJ7;F5H228;A0A1W2PRD7;A0A087X139;O75962-3	O75962-2;O75962-4;O75962;E7EWP2;O75962-5;E7EPJ7	6;6;6;5;5;4;2;1;1;1	6;6;6;5;5;4;2;1;1;1	6;6;6;5;5;4;2;1;1;1	Triple functional domain protein	TRIO	Isoform 2 of Triple functional domain protein;Isoform 4 of Triple functional domain protein;Triple functional domain protein;Triple functional domain protein;Isoform 5 of Triple functional domain protein;Triple functional domain protein (Fragment)	10	6	6	6	0	0	5	2	2	2	0	0	5	2	2	2	0	0	5	2	2	2	3.6	3.6	3.6	329.39	2921	2921;3038;3097;2309;2563;2546;1508;240;255;596	0	9.1802	0	0	3.3	0.6	2.1	0.6	121940000	0	0	9315100	42386000	30990000
O76003	O76003	10	10	10	Glutaredoxin-3	GLRX3	Glutaredoxin-3	1	10	10	10	7	6	8	8	8	9	7	6	8	8	8	9	7	6	8	8	8	9	41.8	41.8	41.8	37.432	335	335	0	87.145	32.8	28.1	34.3	35.8	36.7	39.4	300600000	38262000	29578000	54445000	63744000	48034000
O76074-2;O76074;G5E9C5;C9JGT3;H0YA14	O76074-2;O76074;G5E9C5	23;23;22;7;6	23;23;22;7;6	23;23;22;7;6	cGMP-specific 3,5-cyclic phosphodiesterase	PDE5A	Isoform PDE5A2 of cGMP-specific 3,5-cyclic phosphodiesterase;cGMP-specific 3,5-cyclic phosphodiesterase;Phosphodiesterase	5	23	23	23	1	0	0	19	17	18	1	0	0	19	17	18	1	0	0	19	17	18	35.3	35.3	35.3	94.804	833	833;875;823;224;185	0	173.99	1	0	0	28.6	27.9	29.7	327960000	0	0	0	119580000	107780000
O76094-2;O76094;D6RDY6	O76094-2;O76094;D6RDY6	6;6;4	6;6;4	6;6;4	Signal recognition particle subunit SRP72	SRP72	Isoform 2 of Signal recognition particle subunit SRP72;Signal recognition particle subunit SRP72;Signal recognition particle subunit SRP72 (Fragment)	3	6	6	6	4	2	5	3	5	3	4	2	5	3	5	3	4	2	5	3	5	3	14.1	14.1	14.1	67.879	610	610;671;357	0	25.366	10.7	5.1	11	7.9	12.5	7.9	50647000	10792000	0	12174000	8067900	11357000
O94808;E5RJP4	O94808	20;8	20;8	15;6	Glutamine--fructose-6-phosphate aminotransferase [isomerizing] 2	GFPT2	Glutamine--fructose-6-phosphate aminotransferase [isomerizing] 2	2	20	20	15	15	15	16	2	2	2	15	15	16	2	2	2	12	10	12	0	0	0	39	39	29.2	76.93	682	682;216	0	97.111	30.5	30.2	30.1	4.1	4.1	4.1	243840000	78195000	43129000	86005000	16475000	7981000
O94826	O94826	5	5	5	Mitochondrial import receptor subunit TOM70	TOMM70A	Mitochondrial import receptor subunit TOM70	1	5	5	5	0	0	2	4	4	4	0	0	2	4	4	4	0	0	2	4	4	4	14.6	14.6	14.6	67.454	608	608	0	24.707	0	0	8.6	11.8	11.8	9	52560000	0	0	6007100	21820000	11581000
O94925-3;O94925;B8ZZA8;B8ZZC5;O94925-2;C9JIJ6;H7BZD1;B7Z509;H7C201	O94925-3;O94925	11;9;4;3;3;2;1;1;1	11;9;4;3;3;2;1;1;1	11;9;4;3;3;2;1;1;1	Glutaminase kidney isoform, mitochondrial	GLS	Isoform 3 of Glutaminase kidney isoform, mitochondrial;Glutaminase kidney isoform, mitochondrial	9	11	11	11	2	0	1	10	7	7	2	0	1	10	7	7	2	0	1	10	7	7	32.6	32.6	32.6	65.459	598	598;669;169;103;169;164;114;174;182	0	37.397	7	0	3.5	29.1	23.1	19.9	127150000	7631700	0	3816900	50909000	32739000
O94973;O94973-2;A0A0G2JS82;O94973-3;A0A0G2JQM1;E9PR62;A0A0G2JRS3;A0A0G2JRF9;A0A0G2JQA4;E9PQP4;E9PNC4;A0A0G2JS17;A0A0G2JQT9;H0YDE9;H0YEG0	O94973;O94973-2;A0A0G2JS82;O94973-3;A0A0G2JQM1	14;14;13;12;11;3;2;2;2;1;1;1;1;1;1	7;7;7;5;5;2;2;2;2;1;1;1;1;1;1	7;7;7;5;5;2;2;2;2;1;1;1;1;1;1	AP-2 complex subunit alpha-2	AP2A2	AP-2 complex subunit alpha-2;Isoform 2 of AP-2 complex subunit alpha-2;AP-2 complex subunit alpha-2 (Fragment);Isoform 3 of AP-2 complex subunit alpha-2;AP-2 complex subunit alpha-2 (Fragment)	15	14	7	7	2	1	4	9	8	9	0	0	0	4	4	4	0	0	0	4	4	4	23.9	14.1	14.1	103.96	939	939;940;917;656;634;378;140;356;356;90;125;156;173;184;185	0	20.778	3.3	1.4	5.2	15.5	12.8	15.3	42840000	0	0	0	14286000	9548400
O95182	O95182	1	1	1	NADH dehydrogenase [ubiquinone] 1 alpha subcomplex subunit 7	NDUFA7	NADH dehydrogenase [ubiquinone] 1 alpha subcomplex subunit 7	1	1	1	1	0	0	0	0	1	0	0	0	0	0	1	0	0	0	0	0	1	0	10.6	10.6	10.6	12.551	113	113	0.0080275	2.6084	0	0	0	0	10.6	0	0	0	0	0	0	0
O95197-3;B7Z4M1;O95197-6;O95197-5;O95197-4;O95197-7;O95197-2;O95197;F5H891;F5GWG7;F5H617	O95197-3;B7Z4M1;O95197-6;O95197-5;O95197-4;O95197-7;O95197-2;O95197	3;2;2;2;2;2;2;2;1;1;1	3;2;2;2;2;2;2;2;1;1;1	3;2;2;2;2;2;2;2;1;1;1	Reticulon-3;Reticulon	RTN3	Isoform 3 of Reticulon-3;Reticulon;Isoform 6 of Reticulon-3;Isoform 5 of Reticulon-3;Isoform 4 of Reticulon-3;Isoform 7 of Reticulon-3;Isoform 2 of Reticulon-3;Reticulon-3	11	3	3	3	3	2	2	2	1	1	3	2	2	2	1	1	3	2	2	2	1	1	27.5	27.5	27.5	25.609	236	236;123;214;241;255;920;1013;1032;130;136;185	0	9.8346	27.5	11	11	11	6.4	6.4	64674000	20673000	8152300	15018000	12118000	8713200
O95202	O95202	1	1	1	LETM1 and EF-hand domain-containing protein 1, mitochondrial	LETM1	Mitochondrial proton/calcium exchanger protein	1	1	1	1	0	0	1	1	0	0	0	0	1	1	0	0	0	0	1	1	0	0	1.6	1.6	1.6	83.353	739	739	0.0041667	3.0063	0	0	1.6	1.6	0	0	0	0	0	0	0	0
O95292;E5RK64;O95292-2	O95292;E5RK64;O95292-2	4;2;2	3;1;1	3;1;1	Vesicle-associated membrane protein-associated protein B/C	VAPB	Vesicle-associated membrane protein-associated protein B/C;Vesicle-associated membrane protein-associated protein B/C;Isoform 2 of Vesicle-associated membrane protein-associated protein B/C	3	4	3	3	2	2	2	2	3	2	1	1	1	1	2	1	1	1	1	1	2	1	23.9	18.9	18.9	27.228	243	243;71;99	0.00076746	7.9142	10.7	10.7	10.7	10.7	18.1	10.7	50647000	10419000	4071500	21310000	10687000	4159700
O95302;O95302-3;O95302-2;C9J4P8;Q75LS8	O95302;O95302-3;O95302-2	8;8;4;2;2	8;8;4;2;2	8;8;4;2;2	Peptidyl-prolyl cis-trans isomerase FKBP9	FKBP9	Peptidyl-prolyl cis-trans isomerase FKBP9;Isoform 3 of Peptidyl-prolyl cis-trans isomerase FKBP9;Isoform 2 of Peptidyl-prolyl cis-trans isomerase FKBP9	5	8	8	8	3	2	2	6	4	7	3	2	2	6	4	7	3	2	2	6	4	7	21.1	21.1	21.1	63.083	570	570;623;338;225;142	0	22.329	8.1	5.1	5.1	16.8	12.5	18.9	112330000	13229000	4065200	3274900	35871000	23834000
O95336;M0R261;M0R1L2;M0R0U3	O95336;M0R261	11;9;5;5	11;9;5;5	11;9;5;5	6-phosphogluconolactonase	PGLS	6-phosphogluconolactonase;6-phosphogluconolactonase (Fragment)	4	11	11	11	6	6	7	9	9	9	6	6	7	9	9	9	6	6	7	9	9	9	77.9	77.9	77.9	27.547	258	258;216;147;179	0	76.021	43.4	43.4	47.3	68.2	59.3	59.3	324060000	37534000	34894000	59003000	64183000	58732000
O95340;O95340-2	O95340;O95340-2	5;5	5;5	5;5	Bifunctional 3-phosphoadenosine 5-phosphosulfate synthase 2;Sulfate adenylyltransferase;Adenylyl-sulfate kinase	PAPSS2	Bifunctional 3-phosphoadenosine 5-phosphosulfate synthase 2;Isoform B of Bifunctional 3-phosphoadenosine 5-phosphosulfate synthase 2	2	5	5	5	2	1	3	2	1	0	2	1	3	2	1	0	2	1	3	2	1	0	12.9	12.9	12.9	69.5	614	614;619	0	14.355	5	2.1	8.5	5	2.8	0	39145000	10041000	1052500	11136000	13303000	3611800
Q5QPN9;Q5QPQ3;Q5QPQ2;O95372;Q5QPN5;Q5QPQ1;Q5QPQ0	Q5QPN9;Q5QPQ3;Q5QPQ2;O95372;Q5QPN5;Q5QPQ1;Q5QPQ0	2;2;2;2;1;1;1	2;2;2;2;1;1;1	2;2;2;2;1;1;1	Acyl-protein thioesterase 2	LYPLA2	Acyl-protein thioesterase 2;Acyl-protein thioesterase 2;Acyl-protein thioesterase 2;Acyl-protein thioesterase 2;Acyl-protein thioesterase 2 (Fragment);Acyl-protein thioesterase 2 (Fragment);Acyl-protein thioesterase 2	7	2	2	2	1	1	1	0	0	0	1	1	1	0	0	0	1	1	1	0	0	0	37.2	37.2	37.2	14.518	137	137;180;182;231;90;162;164	0.00065746	4.568	18.2	19	18.2	0	0	0	8278200	0	2931600	5346700	0	0
O95373;E9PLB2;E9PLJ0	O95373	15;2;1	15;2;1	15;2;1	Importin-7	IPO7	Importin-7	3	15	15	15	12	9	13	1	1	1	12	9	13	1	1	1	12	9	13	1	1	1	22	22	22	119.52	1038	1038;130;64	0	110.22	17.1	12.7	19.7	1.4	1.4	1.4	231230000	65848000	27534000	133690000	0	4155400
Q5H8X8;O95399;O95399-2	Q5H8X8;O95399;O95399-2	1;1;1	1;1;1	1;1;1	Urotensin-2	UTS2	Urotensin-2;Urotensin-2;Isoform 2 of Urotensin-2	3	1	1	1	1	1	1	1	1	1	1	1	1	1	1	1	1	1	1	1	1	1	5.8	5.8	5.8	16.276	139	139;124;139	0.0030581	3.4085	5.8	5.8	5.8	5.8	5.8	5.8	174080000	31132000	17057000	32362000	32800000	29709000
O95433-2;O95433;H0YJ63;G3V438;H0YJG7;H0YJU2	O95433-2;O95433;H0YJ63;G3V438;H0YJG7	3;3;2;2;2;1	3;3;2;2;2;1	3;3;2;2;2;1	Activator of 90 kDa heat shock protein ATPase homolog 1	AHSA1	Isoform 2 of Activator of 90 kDa heat shock protein ATPase homolog 1;Activator of 90 kDa heat shock protein ATPase homolog 1;Activator of 90 kDa heat shock protein ATPase homolog 1 (Fragment);Activator of 90 kDa heat shock protein ATPase homolog 1 (Fragmen	6	3	3	3	3	3	3	2	2	2	3	3	3	2	2	2	3	3	3	2	2	2	18.4	18.4	18.4	32.339	288	288;338;90;203;216;133	0	83.97	18.4	18.4	18.4	14.2	14.2	14.2	141160000	31341000	30919000	33676000	17187000	12749000
R4GMU1;O95479	R4GMU1;O95479	2;2	2;2	2;2	GDH/6PGL endoplasmic bifunctional protein;Glucose 1-dehydrogenase;6-phosphogluconolactonase	H6PD	GDH/6PGL endoplasmic bifunctional protein;GDH/6PGL endoplasmic bifunctional protein	2	2	2	2	1	0	1	0	0	0	1	0	1	0	0	0	1	0	1	0	0	0	3.5	3.5	3.5	90.172	802	802;791	0.0012392	3.7098	1.5	0	2	0	0	0	4219800	1279400	0	2940400	0	0
O95486;O95486-2	O95486;O95486-2	2;1	2;1	2;1	Protein transport protein Sec24A	SEC24A	Protein transport protein Sec24A;Isoform 2 of Protein transport protein Sec24A	2	2	2	2	0	0	0	0	1	2	0	0	0	0	1	2	0	0	0	0	1	2	2.7	2.7	2.7	119.75	1093	1093;613	0.0012477	3.7924	0	0	0	0	1	2.7	3860200	0	0	0	0	1446900
O95571;M0QY80;M0QXB5	O95571;M0QY80;M0QXB5	2;1;1	2;1;1	2;1;1	Persulfide dioxygenase ETHE1, mitochondrial	ETHE1	Persulfide dioxygenase ETHE1, mitochondrial;Persulfide dioxygenase ETHE1, mitochondrial;Persulfide dioxygenase ETHE1, mitochondrial	3	2	2	2	0	1	1	1	1	2	0	1	1	1	1	2	0	1	1	1	1	2	10.6	10.6	10.6	27.873	254	254;95;260	0.00070373	5.8931	0	5.5	5.5	5.5	5.5	10.6	1353100	0	0	0	0	0
O95573;F5GWH2	O95573	7;2	7;2	6;2	Long-chain-fatty-acid--CoA ligase 3	ACSL3	Long-chain-fatty-acid--CoA ligase 3	2	7	7	6	1	0	1	5	5	5	1	0	1	5	5	5	0	0	0	4	4	4	14.6	14.6	12.1	80.419	720	720;141	0	20.491	2.5	0	2.5	10.1	10.1	10.8	61256000	3330300	0	4859100	13665000	13855000
O95747;C9JIG9	O95747	5;2	5;2	5;2	Serine/threonine-protein kinase OSR1	OXSR1	Serine/threonine-protein kinase OSR1	2	5	5	5	3	5	3	2	2	3	3	5	3	2	2	3	3	5	3	2	2	3	12.5	12.5	12.5	58.022	527	527;468	0	41.995	7.2	12.5	7.4	5.7	4.6	7.4	62168000	16642000	5698000	14353000	13666000	4218100
O95782-2;O95782;M0R2D9	O95782-2;O95782	20;20;1	20;20;1	13;13;0	AP-2 complex subunit alpha-1	AP2A1	Isoform B of AP-2 complex subunit alpha-1;AP-2 complex subunit alpha-1	3	20	20	13	9	6	13	12	12	12	9	6	13	12	12	12	7	5	9	7	8	7	31.1	31.1	21.5	105.36	955	955;977;57	0	66.027	13.6	10.5	21	19.9	19.6	19.1	259780000	23372000	10365000	62596000	65872000	48829000
O95817;C9JFK9	O95817;C9JFK9	5;4	5;4	5;4	BAG family molecular chaperone regulator 3	BAG3	BAG family molecular chaperone regulator 3;BAG family molecular chaperone regulator 3 (Fragment)	2	5	5	5	5	2	3	2	3	3	5	2	3	2	3	3	5	2	3	2	3	3	13.7	13.7	13.7	61.594	575	575;325	0	14.337	13.7	5.9	9.4	4.7	8.7	8.7	96420000	29919000	5663500	16050000	15731000	19847000
O95831-3;O95831;O95831-2;E9PMA0;O95831-5;O95831-6;O95831-4	O95831-3;O95831;O95831-2;E9PMA0	5;5;4;3;2;1;1	5;5;4;3;2;1;1	5;5;4;3;2;1;1	Apoptosis-inducing factor 1, mitochondrial	AIFM1	Isoform 3 of Apoptosis-inducing factor 1, mitochondrial;Apoptosis-inducing factor 1, mitochondrial;Isoform 2 of Apoptosis-inducing factor 1, mitochondrial;Apoptosis-inducing factor 1, mitochondrial	7	5	5	5	0	1	1	3	5	3	0	1	1	3	5	3	0	1	1	3	5	3	11.7	11.7	11.7	66.294	609	609;613;326;274;261;237;324	0	14.592	0	2.3	2.3	6.9	11.7	7.2	29491000	0	2197100	0	12922000	12132000
O95881	O95881	3	3	3	Thioredoxin domain-containing protein 12	TXNDC12	Thioredoxin domain-containing protein 12	1	3	3	3	1	2	1	2	3	1	1	2	1	2	3	1	1	2	1	2	3	1	39.5	39.5	39.5	19.206	172	172	0	17.825	8.1	30.8	22.7	30.8	39.5	22.7	43709000	0	6273400	7183000	6542500	15403000
O96005-3;O96005-4;O96005;K7EQQ1	O96005-3;O96005-4;O96005;K7EQQ1	2;2;2;1	2;2;2;1	2;2;2;1	Cleft lip and palate transmembrane protein 1	CLPTM1	Isoform 2 of Cleft lip and palate transmembrane protein 1;Isoform 3 of Cleft lip and palate transmembrane protein 1;Cleft lip and palate transmembrane protein 1;Cleft lip and palate transmembrane protein 1 (Fragment)	4	2	2	2	2	1	1	1	1	1	2	1	1	1	1	1	2	1	1	1	1	1	7.1	7.1	7.1	65.596	567	567;655;669;171	0.00067476	5.098	7.1	5.6	5.6	5.6	5.6	5.6	38937000	5673300	4107100	5559100	10059000	7501800
O96008;O96008-2;K7EJ57;K7EKG4	O96008;O96008-2;K7EJ57	9;6;5;2	9;6;5;2	9;6;5;2	Mitochondrial import receptor subunit TOM40 homolog	TOMM40	Mitochondrial import receptor subunit TOM40 homolog;Isoform 2 of Mitochondrial import receptor subunit TOM40 homolog;Mitochondrial import receptor subunit TOM40 homolog (Fragment)	4	9	9	9	1	2	2	5	4	3	1	2	2	5	4	3	1	2	2	5	4	3	46.3	46.3	46.3	37.893	361	361;329;214;168	0	29.741	8.9	13.3	8	19.9	25.2	21.6	65790000	2610200	3616000	7228600	18590000	17727000
O96019;O96019-2;H7C5S0;O94805;C9JQT2	O96019;O96019-2;H7C5S0	6;5;3;2;1	6;5;3;2;1	6;5;3;2;1	Actin-like protein 6A	ACTL6A	Actin-like protein 6A;Isoform 2 of Actin-like protein 6A;Actin-like protein 6A (Fragment)	5	6	6	6	1	0	1	3	4	3	1	0	1	3	4	3	1	0	1	3	4	3	23.1	23.1	23.1	47.46	429	429;387;161;426;50	0	16.619	4.2	0	4.2	11	16.3	13.5	49683000	4331100	0	6849300	10726000	11253000
P00167-2;P00167;P00167-3;J3KNC7	P00167-2;P00167;P00167-3	3;3;2;1	3;3;2;1	3;3;2;1	Cytochrome b5	CYB5A	Isoform 2 of Cytochrome b5;Cytochrome b5;Isoform 3 of Cytochrome b5	4	3	3	3	0	0	0	1	2	3	0	0	0	1	2	3	0	0	0	1	2	3	49	49	49	11.268	98	98;134;124;60	0	9.5834	0	0	0	13.3	34.7	49	33926000	0	0	0	0	10099000
P00338;P00338-3;P00338-4;P00338-5;P00338-2;F5GXY2;F5GYU2;F5GXH2;F5H5J4;F5H6W8;F5GZQ4;F5H8H6;F5GXC7;F5GWW2;F5GXU1;F5H5G7;F5H155;A0A087WUM2;G3XAP5;F5H245;Q6ZMR3;P07864	P00338;P00338-3;P00338-4;P00338-5;P00338-2	29;28;23;19;19;14;12;11;8;8;6;4;4;4;3;1;1;1;1;1;1;1	29;28;23;19;19;14;12;11;8;8;6;4;4;4;3;1;1;1;1;1;1;1	28;27;22;18;18;14;12;11;8;8;6;4;4;4;3;0;0;0;0;0;0;0	L-lactate dehydrogenase A chain	LDHA	L-lactate dehydrogenase A chain;Isoform 3 of L-lactate dehydrogenase A chain;Isoform 4 of L-lactate dehydrogenase A chain;Isoform 5 of L-lactate dehydrogenase A chain;Isoform 2 of L-lactate dehydrogenase A chain	22	29	29	28	24	25	25	22	26	23	24	25	25	22	26	23	23	24	24	21	25	22	84.9	84.9	81.3	36.688	332	332;361;274;241;274;156;144;114;89;94;72;42;45;45;46;183;225;233;241;318;332;332	0	323.31	79.5	79.8	81	76.5	83.4	75	20430000000	3873700000	2060200000	5460200000	2657900000	3027200000
P00367;P00367-3;P00367-2;P49448	P00367;P00367-3;P00367-2;P49448	17;14;12;11	17;14;12;11	17;14;12;11	Glutamate dehydrogenase 1, mitochondrial;Glutamate dehydrogenase 2, mitochondrial	GLUD1;GLUD2	Glutamate dehydrogenase 1, mitochondrial;Isoform 3 of Glutamate dehydrogenase 1, mitochondrial;Isoform 2 of Glutamate dehydrogenase 1, mitochondrial;Glutamate dehydrogenase 2, mitochondrial	4	17	17	17	11	7	13	12	11	11	11	7	13	12	11	11	11	7	13	12	11	11	44.6	44.6	44.6	61.397	558	558;425;391;558	0	61.949	27.4	17.7	37.1	30.6	26.3	33	293970000	43011000	17882000	63546000	50067000	28058000
P00387-2;P00387;P00387-3;B1AHF3	P00387-2;P00387;P00387-3;B1AHF3	9;9;9;5	9;9;9;5	9;9;9;5	NADH-cytochrome b5 reductase 3;NADH-cytochrome b5 reductase 3 membrane-bound form;NADH-cytochrome b5 reductase 3 soluble form	CYB5R3	Isoform 2 of NADH-cytochrome b5 reductase 3;NADH-cytochrome b5 reductase 3;Isoform 3 of NADH-cytochrome b5 reductase 3;NADH-cytochrome b5 reductase 3 (Fragment)	4	9	9	9	7	6	6	6	8	8	7	6	6	6	8	8	7	6	6	6	8	8	59.7	59.7	59.7	31.628	278	278;301;334;147	0	132.59	47.5	35.6	30.2	35.6	51.4	50	440350000	85393000	33175000	90240000	65705000	76022000
P00390-2;P00390;P00390-4;P00390-3;P00390-5;E5RI06;H0YC68	P00390-2;P00390;P00390-4;P00390-3;P00390-5	13;13;12;12;11;4;2	13;13;12;12;11;4;2	13;13;12;12;11;4;2	Glutathione reductase, mitochondrial	GSR	Isoform Cytoplasmic of Glutathione reductase, mitochondrial;Glutathione reductase, mitochondrial;Isoform 3 of Glutathione reductase, mitochondrial;Isoform 2 of Glutathione reductase, mitochondrial;Isoform 4 of Glutathione reductase, mitochondrial	7	13	13	13	2	2	1	10	7	13	2	2	1	10	7	13	2	2	1	10	7	13	47.6	47.6	47.6	51.7	479	479;522;469;493;440;144;131	0	125.84	10.9	10.9	4.8	41.3	29.4	47.6	262470000	13048000	7431100	2360500	60308000	56676000
P00395	P00395	1	1	1	Cytochrome c oxidase subunit 1	MT-CO1	Cytochrome c oxidase subunit 1	1	1	1	1	1	0	0	1	1	1	1	0	0	1	1	1	1	0	0	1	1	1	6	6	6	57.041	513	513	0	18.788	6	0	0	6	6	6	52864000	5880300	0	0	13821000	21650000
P00403	P00403	4	4	4	Cytochrome c oxidase subunit 2	MT-CO2	Cytochrome c oxidase subunit 2	1	4	4	4	1	2	3	2	2	3	1	2	3	2	2	3	1	2	3	2	2	3	23.3	23.3	23.3	25.565	227	227	0	29.777	4.4	13.2	20.3	11.5	11.5	14.5	84636000	6216700	6027700	25216000	15796000	10535000
P00414	P00414	1	1	1	Cytochrome c oxidase subunit 3	MT-CO3	Cytochrome c oxidase subunit 3	1	1	1	1	1	0	1	1	1	1	1	0	1	1	1	1	1	0	1	1	1	1	5.4	5.4	5.4	29.95	261	261	0.0012407	3.7167	5.4	0	5.4	5.4	5.4	5.4	162830000	16144000	0	3000700	56132000	37136000
P00441;H7BYH4	P00441;H7BYH4	6;5	6;5	6;5	Superoxide dismutase [Cu-Zn]	SOD1	Superoxide dismutase [Cu-Zn];Superoxide dismutase [Cu-Zn]	2	6	6	6	5	4	5	5	6	6	5	4	5	5	6	6	5	4	5	5	6	6	60.4	60.4	60.4	15.936	154	154;135	0	176.16	60.4	60.4	60.4	60.4	60.4	60.4	1301400000	139460000	80953000	207260000	282260000	293090000
P00491;G3V5M2;G3V393;G3V2H3	P00491;G3V5M2	7;5;2;2	7;5;2;2	7;5;2;2	Purine nucleoside phosphorylase	PNP	Purine nucleoside phosphorylase;Purine nucleoside phosphorylase (Fragment)	4	7	7	7	5	5	7	0	0	0	5	5	7	0	0	0	5	5	7	0	0	0	37.4	37.4	37.4	32.118	289	289;221;61;93	0	36.116	24.9	24.9	37.4	0	0	0	95240000	26748000	10274000	58219000	0	0
P00492	P00492	9	9	9	Hypoxanthine-guanine phosphoribosyltransferase	HPRT1	Hypoxanthine-guanine phosphoribosyltransferase	1	9	9	9	7	8	6	5	6	5	7	8	6	5	6	5	7	8	6	5	6	5	57.3	57.3	57.3	24.579	218	218	0	42.697	46.8	52.8	39.4	33.9	33	34.9	156630000	39483000	22948000	53031000	16484000	16437000
P00505;P00505-2	P00505;P00505-2	12;11	12;11	12;11	Aspartate aminotransferase, mitochondrial	GOT2	Aspartate aminotransferase, mitochondrial;Isoform 2 of Aspartate aminotransferase, mitochondrial	2	12	12	12	6	4	8	9	7	11	6	4	8	9	7	11	6	4	8	9	7	11	38.1	38.1	38.1	47.517	430	430;387	0	109.7	21.2	12.1	29.3	28.1	18.6	36.3	289250000	28538000	9675500	78785000	67112000	32975000
P00558;P00558-2;P07205	P00558;P00558-2	33;31;6	33;31;6	33;31;6	Phosphoglycerate kinase 1	PGK1	Phosphoglycerate kinase 1;Isoform 2 of Phosphoglycerate kinase 1	3	33	33	33	29	29	31	28	29	26	29	29	31	28	29	26	29	29	31	28	29	26	78.2	78.2	78.2	44.614	417	417;389;417	0	323.31	75.5	75.5	75.5	75.5	74.8	73.9	15556000000	3020400000	1766700000	3938000000	2297700000	2082400000
Q5T9B7;P00568;H0YID2;H0Y4J6;Q9Y6K8-2;Q9Y6K8-3;Q9Y6K8	Q5T9B7;P00568;H0YID2;H0Y4J6	6;6;3;3;1;1;1	6;6;3;3;1;1;1	6;6;3;3;1;1;1	Adenylate kinase isoenzyme 1	AK1	Adenylate kinase isoenzyme 1;Adenylate kinase isoenzyme 1;Adenylate kinase isoenzyme 1 (Fragment);Adenylate kinase isoenzyme 1 (Fragment)	7	6	6	6	4	4	4	5	3	4	4	4	4	5	3	4	4	4	4	5	3	4	38.6	38.6	38.6	23.411	210	210;194;51;135;197;536;562	0	20.644	28.1	23.3	23.3	32.4	17.1	23.3	86929000	11132000	10586000	18249000	14763000	6484500
Q5T6L5;Q5T6L6;P00966	Q5T6L5;Q5T6L6;P00966	1;1;1	1;1;1	1;1;1	Argininosuccinate synthase	ASS1	Argininosuccinate synthase (Fragment);Argininosuccinate synthase (Fragment);Argininosuccinate synthase	3	1	1	1	0	0	1	1	0	0	0	0	1	1	0	0	0	0	1	1	0	0	11.2	11.2	11.2	20.261	179	179;198;412	0.0041941	3.106	0	0	11.2	11.2	0	0	5880400	0	0	4219000	1661300	0
P01023;P20742-2	P01023	4;1	4;1	3;0	Alpha-2-macroglobulin	A2M	Alpha-2-macroglobulin	2	4	4	3	3	2	3	0	0	0	3	2	3	0	0	0	2	2	3	0	0	0	2.5	2.5	1.9	163.29	1474	1474;1268	0.00068166	5.3135	2	1.4	1.9	0	0	0	26620000	7961300	10912000	7747400	0	0
Q5H9A7;P01033;Q5H9B4;Q5H9B5;H0Y789	Q5H9A7;P01033	3;3;1;1;1	3;3;1;1;1	3;3;1;1;1	Metalloproteinase inhibitor 1	TIMP1	Metalloproteinase inhibitor 1;Metalloproteinase inhibitor 1	5	3	3	3	0	2	2	0	0	0	0	2	2	0	0	0	0	2	2	0	0	0	19.6	19.6	19.6	16.057	143	143;207;95;136;165	0.00064475	4.2467	0	14.7	13.3	0	0	0	11888000	0	2256100	9631500	0	0
P01112;P01111;P01112-2;P01116-2;P01116	P01112;P01111;P01112-2;P01116-2;P01116	2;2;1;1;1	2;2;1;1;1	2;2;1;1;1	GTPase HRas;GTPase HRas, N-terminally processed;GTPase NRas;GTPase KRas;GTPase KRas, N-terminally processed	HRAS;NRAS;KRAS	GTPase HRas;GTPase NRas;Isoform 2 of GTPase HRas;Isoform 2B of GTPase KRas;GTPase KRas	5	2	2	2	0	0	0	2	1	1	0	0	0	2	1	1	0	0	0	2	1	1	19.6	19.6	19.6	21.298	189	189;189;170;188;189	0	9.0101	0	0	0	19.6	13.2	13.2	7381700	0	0	0	0	3740200
P01584;C9JWV2	P01584;C9JWV2	2;1	2;1	2;1	Interleukin-1 beta	IL1B	Interleukin-1 beta;Interleukin-1 beta (Fragment)	2	2	2	2	2	2	2	0	0	0	2	2	2	0	0	0	2	2	2	0	0	0	14.9	14.9	14.9	30.748	269	269;143	0	28.007	14.9	14.9	14.9	0	0	0	36240000	11209000	4884600	20146000	0	0
P01911;Q29974;Q5Y7A7;P01912;Q9GIY3;Q30154;P04229;Q95IE3;P20039;Q30167;P13760	P01911;Q29974;Q5Y7A7;P01912;Q9GIY3;Q30154;P04229	4;3;3;3;2;2;2;1;1;1;1	4;3;3;3;2;2;2;1;1;1;1	4;3;3;3;2;2;2;1;1;1;1	HLA class II histocompatibility antigen, DRB1-15 beta chain;HLA class II histocompatibility antigen, DRB1-16 beta chain;HLA class II histocompatibility antigen, DRB1-13 beta chain;HLA class II histocompatibility antigen, DRB1-3 chain;HLA class II histocompatibility antigen, DRB1-14 beta chain;HLA class II histocompatibility antigen, DR beta 5 chain;HLA class II histocompatibility antigen, DRB1-1 …	HLA-DRB1;HLA-DRB5	HLA class II histocompatibility antigen, DRB1-15 beta chain;HLA class II histocompatibility antigen, DRB1-16 beta chain;HLA class II histocompatibility antigen, DRB1-13 beta chain;HLA class II histocompatibility antigen, DRB1-3 chain;HLA class II histocomp	11	4	4	4	2	3	4	0	0	0	2	3	4	0	0	0	2	3	4	0	0	0	23.7	23.7	23.7	29.966	266	266;266;266;266;266;266;266;266;266;266;266	0	33.351	15	18.8	23.7	0	0	0	45977000	13179000	10817000	21981000	0	0
P02533;P08779;Q04695;P19012;F5GWP8;P08727;C9JM50;K7EPJ9;K7ERE3;P13646-3;P13646;K7EMD9;A8MT21;P19012-2;P13646-2;K7ESE1;K7ENW6;K7EMS3;C9JTG5;Q8N1A0-2;Q8N1A0;P35900	P02533;P08779;Q04695;P19012	10;7;5;5;4;4;3;3;3;3;3;2;2;2;2;1;1;1;1;1;1;1	7;4;3;3;3;2;1;1;2;2;2;1;2;2;1;1;1;1;1;1;1;1	7;4;3;3;3;2;1;1;2;2;2;1;2;2;1;1;1;1;1;1;1;1	Keratin, type I cytoskeletal 14;Keratin, type I cytoskeletal 16;Keratin, type I cytoskeletal 17;Keratin, type I cytoskeletal 15	KRT14;KRT16;KRT17;KRT15	Keratin, type I cytoskeletal 14;Keratin, type I cytoskeletal 16;Keratin, type I cytoskeletal 17;Keratin, type I cytoskeletal 15	22	10	7	7	7	8	7	5	9	6	6	6	5	4	7	4	6	6	5	4	7	4	24.2	19.3	19.3	51.561	472	472;473;432;456;349;400;196;231;415;420;458;165;291;251;355;95;162;181;220;255;295;424	0	32.56	18.4	20.3	15.3	11.2	22.7	13.8	109240000	15984000	23598000	14187000	12716000	30950000
P02545;P02545-6;P02545-3;P02545-5;P02545-4;H0YAB0;A0A0C4DGC5	P02545;P02545-6;P02545-3;P02545-5;P02545-4	37;35;35;30;30;13;10	37;35;35;30;30;13;10	3;1;2;3;3;0;2	Prelamin-A/C;Lamin-A/C	LMNA	Prelamin-A/C;Isoform 6 of Prelamin-A/C;Isoform ADelta10 of Prelamin-A/C;Isoform 5 of Prelamin-A/C;Isoform 4 of Prelamin-A/C	7	37	37	3	35	33	34	35	35	33	35	33	34	35	35	33	3	3	3	3	3	2	60.7	60.7	12.2	74.139	664	664;614;634;565;574;182;260	0	323.31	58.6	57.2	59	60.5	59	52.3	4185500000	670450000	347670000	793380000	854560000	745580000
P02545-2;Q3BDU5;Q5TCI8	P02545-2;Q3BDU5;Q5TCI8	35;29;28	1;1;1	1;1;1	Prelamin-A/C;Lamin-A/C	LMNA	Isoform C of Prelamin-A/C;Prelamin-A/C;Prelamin-A/C	3	35	1	1	33	31	32	33	33	32	1	1	1	1	1	1	1	1	1	1	1	1	60.8	4.5	4.5	65.134	572	572;487;491	0	34.016	58.4	56.8	58.9	60.7	58.9	57.5	136460000	12458000	8935600	37468000	31605000	15160000
P02751-10;P02751-5;P02751-9;P02751-14;P02751-13;P02751-8;P02751-17;P02751-3;P02751;P02751-7;P02751-15;H0Y7Z1;P02751-12;P02751-4;P02751-6;P02751-11;H0Y4K8	P02751-10;P02751-5;P02751-9;P02751-14;P02751-13;P02751-8;P02751-17;P02751-3;P02751;P02751-7;P02751-15;H0Y7Z1;P02751-12;P02751-4;P02751-6;P02751-11	6;6;6;6;6;6;6;6;6;6;6;5;5;5;5;5;1	6;6;6;6;6;6;6;6;6;6;6;5;5;5;5;5;1	6;6;6;6;6;6;6;6;6;6;6;5;5;5;5;5;1	Fibronectin;Anastellin;Ugl-Y1;Ugl-Y2;Ugl-Y3	FN1	Isoform 10 of Fibronectin;Isoform 5 of Fibronectin;Isoform 9 of Fibronectin;Isoform 14 of Fibronectin;Isoform 13 of Fibronectin;Isoform 8 of Fibronectin;Isoform 17 of Fibronectin;Isoform 3 of Fibronectin;Fibronectin;Isoform 7 of Fibronectin;Isoform 15 of F	17	6	6	6	2	1	4	1	1	1	2	1	4	1	1	1	2	1	4	1	1	1	4	4	4	239.62	2176	2176;2211;2240;2265;2267;2296;2330;2355;2386;2446;2477;1103;2008;2031;2184;2386;241	0	14.833	1.5	0.7	2.8	0.3	0.3	0.3	19851000	0	0	6083100	7012100	6756000
P02765;C9JV77	P02765;C9JV77	2;1	2;1	2;1	Alpha-2-HS-glycoprotein;Alpha-2-HS-glycoprotein chain A;Alpha-2-HS-glycoprotein chain B	AHSG	Alpha-2-HS-glycoprotein;Alpha-2-HS-glycoprotein	2	2	2	2	2	1	1	0	0	0	2	1	1	0	0	0	2	1	1	0	0	0	5.2	5.2	5.2	39.324	367	367;368	0.00075472	7.6089	5.2	3.3	3.3	0	0	0	4305300	0	0	4305300	0	0
P02786;G3V0E5;F8WBE5;H7C3V5	P02786;G3V0E5	15;13;2;2	15;13;2;2	15;13;2;2	Transferrin receptor protein 1;Transferrin receptor protein 1, serum form	TFRC	Transferrin receptor protein 1;Transferrin receptor (P90, CD71), isoform CRA_c	4	15	15	15	13	12	13	2	0	1	13	12	13	2	0	1	13	12	13	2	0	1	23	23	23	84.87	760	760;679;81;118	0	66.355	20.1	18.9	20.7	3.4	0	1.2	246450000	56427000	37309000	148440000	4271600	0
P02792	P02792	8	8	8	Ferritin light chain	FTL	Ferritin light chain	1	8	8	8	5	2	2	8	8	8	5	2	2	8	8	8	5	2	2	8	8	8	46.3	46.3	46.3	20.019	175	175	0	99.374	36.6	14.9	14.9	46.3	46.3	46.3	1085500000	38152000	5475400	9642000	350030000	348010000
P02794;G3V192;G3V1D1;E9PRK8;E9PKY7;E9PPQ4;E9PQR3;E9PKM5;E9PK45	P02794;G3V192;G3V1D1	11;9;8;4;4;3;2;2;2	11;9;8;4;4;3;2;2;2	11;9;8;4;4;3;2;2;2	Ferritin heavy chain;Ferritin heavy chain, N-terminally processed;Ferritin	FTH1	Ferritin heavy chain;Ferritin;Ferritin	9	11	11	11	10	9	9	9	10	10	10	9	9	9	10	10	10	9	9	9	10	10	66.7	66.7	66.7	21.225	183	183;153;113;95;114;58;50;81;102	0	63.247	66.1	57.9	57.9	57.9	66.7	66.1	997800000	186410000	104040000	224780000	173310000	157010000
P02795;H3BSP9;Q8N339;P80297;P13640-2;P04732;P13640	P02795;H3BSP9;Q8N339;P80297;P13640-2;P04732;P13640	2;1;1;1;1;1;1	2;1;1;1;1;1;1	2;1;1;1;1;1;1	Metallothionein-2;Metallothionein;Metallothionein-1M;Metallothionein-1X;Metallothionein-1G;Metallothionein-1E	MT2A;MT1M;MT1X;MT1G;MT1E	Metallothionein-2;Metallothionein;Metallothionein-1M;Metallothionein-1X;Isoform 2 of Metallothionein-1G;Metallothionein-1E;Metallothionein-1G	7	2	2	2	2	2	2	2	2	2	2	2	2	2	2	2	2	2	2	2	2	2	52.5	52.5	52.5	6.0422	61	61;73;61;61;61;61;62	0	55.814	52.5	52.5	52.5	52.5	52.5	52.5	615530000	238160000	94195000	122150000	75530000	44948000
P04040	P04040	9	9	9	Catalase	CAT	Catalase	1	9	9	9	3	1	2	7	5	7	3	1	2	7	5	7	3	1	2	7	5	7	27.5	27.5	27.5	59.755	527	527	0	42.573	8.3	3.6	5.5	20.1	16.5	23.1	109240000	5369300	1915700	6662500	22737000	30295000
P04075;H3BQN4;J3KPS3;P04075-2;H3BPS8;H3BUH7;H3BR04;H3BMQ8;H3BU78;H3BR68	P04075;H3BQN4;J3KPS3;P04075-2;H3BPS8;H3BUH7;H3BR04	27;25;25;25;17;15;14;13;9;7	27;25;25;25;17;15;14;13;9;7	24;22;24;22;14;15;14;13;9;7	Fructose-bisphosphate aldolase A;Fructose-bisphosphate aldolase	ALDOA	Fructose-bisphosphate aldolase A;Fructose-bisphosphate aldolase;Fructose-bisphosphate aldolase;Isoform 2 of Fructose-bisphosphate aldolase A;Fructose-bisphosphate aldolase A (Fragment);Fructose-bisphosphate aldolase A (Fragment);Fructose-bisphosphate aldol	10	27	27	24	26	21	22	23	23	22	26	21	22	23	23	22	23	18	19	20	20	19	81.6	81.6	72	39.42	364	364;361;368;418;278;155;162;140;204;130	0	323.31	81.6	77.2	81	77.2	77.2	81	14667000000	2691000000	1505600000	2677900000	2777200000	2545700000
P04080;A0A1W2PS52;A0A1W2PQG6	P04080;A0A1W2PS52	3;2;1	3;2;1	3;2;1	Cystatin-B	CSTB	Cystatin-B;Cystatin-B	3	3	3	3	3	2	2	1	1	1	3	2	2	1	1	1	3	2	2	1	1	1	58.2	58.2	58.2	11.139	98	98;83;54	0.00078247	8.3053	58.2	33.7	33.7	12.2	12.2	12.2	70326000	25207000	15709000	16011000	3733600	3023200
P04083;Q5T3N1;Q5T3N0	P04083	24;11;8	24;11;8	24;11;8	Annexin A1	ANXA1	Annexin A1	3	24	24	24	22	21	21	23	22	22	22	21	21	23	22	22	22	21	21	23	22	22	69.9	69.9	69.9	38.714	346	346;204;115	0	323.31	65.9	63.6	65.6	69.7	67.6	67.6	4974200000	1001500000	532590000	1322400000	618760000	694740000
P04179;P04179-3;P04179-4;P04179-2;F5H4R2;F5GYZ5;F5H3C5;G5E9P6;F5GXZ9;G8JLJ2	P04179;P04179-3;P04179-4;P04179-2;F5H4R2;F5GYZ5;F5H3C5	7;6;6;6;5;5;4;3;3;2	7;6;6;6;5;5;4;3;3;2	7;6;6;6;5;5;4;3;3;2	Superoxide dismutase [Mn], mitochondrial	SOD2	Superoxide dismutase [Mn], mitochondrial;Isoform 3 of Superoxide dismutase [Mn], mitochondrial;Isoform 4 of Superoxide dismutase [Mn], mitochondrial;Isoform 2 of Superoxide dismutase [Mn], mitochondrial;Superoxide dismutase (Fragment);Superoxide dismutase	10	7	7	7	5	6	4	0	0	0	5	6	4	0	0	0	5	6	4	0	0	0	47.7	47.7	47.7	24.75	222	222;162;176;183;183;190;111;140;141;61	0	30.954	35.6	44.1	32	0	0	0	193020000	51535000	46581000	94905000	0	0
P04181;P04181-2	P04181;P04181-2	6;3	6;3	6;3	Ornithine aminotransferase, mitochondrial;Ornithine aminotransferase, hepatic form;Ornithine aminotransferase, renal form	OAT	Ornithine aminotransferase, mitochondrial;Isoform 2 of Ornithine aminotransferase, mitochondrial	2	6	6	6	6	3	2	4	4	5	6	3	2	4	4	5	6	3	2	4	4	5	17.5	17.5	17.5	48.534	439	439;301	0	17.38	17.5	9.3	6.2	13.2	13.2	15.3	62184000	8821800	5903100	6793300	10514000	17728000
P04264	P04264	30	30	26	Keratin, type II cytoskeletal 1	KRT1	Keratin, type II cytoskeletal 1	1	30	30	26	20	29	20	20	25	21	20	29	20	20	25	21	17	25	17	17	21	17	50.3	50.3	45.7	66.038	644	644	0	323.31	40.5	50.3	40.2	38.2	45.5	41.5	2597200000	341250000	716390000	452540000	377440000	454570000
P04406;P04406-2;E7EUT5;O14556	P04406;P04406-2;E7EUT5	21;18;16;1	21;18;16;1	21;18;16;1	Glyceraldehyde-3-phosphate dehydrogenase	GAPDH	Glyceraldehyde-3-phosphate dehydrogenase;Isoform 2 of Glyceraldehyde-3-phosphate dehydrogenase;Glyceraldehyde-3-phosphate dehydrogenase	4	21	21	21	18	17	18	17	19	16	18	17	18	17	19	16	18	17	18	17	19	16	82.4	82.4	82.4	36.053	335	335;293;260;408	0	323.31	79.1	74	79.1	76.7	80.3	73.7	38909000000	7945700000	4893800000	10338000000	4509800000	5650100000
P04733	P04733	1	1	1	Metallothionein-1F	MT1F	Metallothionein-1F	1	1	1	1	0	0	1	0	0	0	0	0	1	0	0	0	0	0	1	0	0	0	19.7	19.7	19.7	6.0863	61	61	0.0053191	2.912	0	0	19.7	0	0	0	0	0	0	0	0	0
P04792;F8WE04;C9J3N8	P04792;F8WE04	15;10;2	15;10;2	15;10;2	Heat shock protein beta-1	HSPB1	Heat shock protein beta-1;Heat shock protein beta-1	3	15	15	15	11	11	10	14	15	13	11	11	10	14	15	13	11	11	10	14	15	13	79.5	79.5	79.5	22.782	205	205;186;37	0	323.31	59	66.8	59	79.5	79.5	71.7	1696500000	187300000	146020000	224920000	403930000	384200000
P04843;B7Z4L4;F8WF32	P04843;B7Z4L4	22;14;5	22;14;5	22;14;5	Dolichyl-diphosphooligosaccharide--protein glycosyltransferase subunit 1	RPN1	Dolichyl-diphosphooligosaccharide--protein glycosyltransferase subunit 1;Dolichyl-diphosphooligosaccharide--protein glycosyltransferase subunit 1	3	22	22	22	20	21	21	17	19	16	20	21	21	17	19	16	20	21	21	17	19	16	51.4	51.4	51.4	68.569	607	607;435;121	0	181.48	47.9	49.8	49.8	41.7	44	36.7	1309100000	262200000	141410000	277590000	225950000	219960000
P04844;P04844-2;Q5JYR7;Q5JYR4;F2Z3K5;Q5JYR3;H0Y5M1	P04844;P04844-2	19;18;9;6;4;2;2	19;18;9;6;4;2;2	19;18;9;6;4;2;2	Dolichyl-diphosphooligosaccharide--protein glycosyltransferase subunit 2	RPN2	Dolichyl-diphosphooligosaccharide--protein glycosyltransferase subunit 2;Isoform 2 of Dolichyl-diphosphooligosaccharide--protein glycosyltransferase subunit 2	7	19	19	19	15	15	13	12	13	14	15	15	13	12	13	14	15	15	13	12	13	14	56.3	56.3	56.3	69.283	631	631;615;344;166;162;138;147	0	282.33	47.2	47.4	42.9	40.3	41.2	43.7	848580000	121830000	78767000	200970000	118830000	117030000
P04899;P04899-4;P04899-6;P04899-3;P04899-5;P04899-2;P63096;P63096-2;A0A1W2PRE1;A2A2R6;A0A1W2PQK2;A0A087WTB6;Q5JWD1;H0Y7E8;A0A1W2PRJ7;A0A087WZE5;C9JPP4;A0A1W2PS82;A0A1W2PP38;P11488;P19087;A8MTJ3;P38405;P38405-2	P04899;P04899-4;P04899-6;P04899-3;P04899-5;P04899-2	13;13;12;12;12;12;5;4;1;1;1;1;1;1;1;1;1;1;1;1;1;1;1;1	13;13;12;12;12;12;5;4;1;1;1;1;1;1;1;1;1;1;1;1;1;1;1;1	8;8;8;8;8;8;0;0;0;0;0;0;0;0;0;0;0;0;0;0;0;0;0;0	Guanine nucleotide-binding protein G(i) subunit alpha-2	GNAI2	Guanine nucleotide-binding protein G(i) subunit alpha-2;Isoform sGi2 of Guanine nucleotide-binding protein G(i) subunit alpha-2;Isoform 6 of Guanine nucleotide-binding protein G(i) subunit alpha-2;Isoform 3 of Guanine nucleotide-binding protein G(i) subuni	24	13	13	8	9	10	9	8	9	9	9	10	9	8	9	9	5	7	5	6	7	6	49.3	49.3	33	40.45	355	355;366;303;318;339;339;354;302;54;61;61;84;87;93;104;123;144;146;196;350;354;354;381;458	0	82.318	34.6	38.3	34.4	30.4	34.9	34.6	300370000	42219000	65440000	67186000	38778000	38469000
P05023-4;P05023;P05023-3;P05023-2;M0R116;A0A0A0MT26;P13637;P13637-2;P13637-3;B1AKY9;P50993;H0Y7C1;Q13733;Q5TC01;Q5TC02;P20648;P54707;P54707-2;M0QXF2;E9PRA5	P05023-4;P05023;P05023-3;P05023-2	26;26;25;15;12;12;12;12;12;10;10;8;6;4;3;3;3;3;2;2	26;26;25;15;12;12;12;12;12;10;10;8;6;4;3;3;3;3;2;2	26;26;25;15;12;12;12;12;12;10;10;8;6;4;3;3;3;3;2;2	Sodium/potassium-transporting ATPase subunit alpha-1	ATP1A1	Isoform 4 of Sodium/potassium-transporting ATPase subunit alpha-1;Sodium/potassium-transporting ATPase subunit alpha-1;Isoform 3 of Sodium/potassium-transporting ATPase subunit alpha-1;Isoform 2 of Sodium/potassium-transporting ATPase subunit alpha-1	20	26	26	26	12	13	15	16	17	17	12	13	15	16	17	17	12	13	15	16	17	17	34.5	34.5	34.5	113	1023	1023;1023;992;681;983;1226;1013;1024;1026;1009;1020;714;1029;144;106;1035;1039;1045;251;517	0	122.93	19.6	16.5	21.2	23	25.8	23.2	412150000	60339000	28804000	66093000	79618000	100090000
P05091;P05091-2;F8VP50;S4R3S4	P05091;P05091-2;F8VP50	5;4;3;1	4;3;3;1	4;3;3;1	Aldehyde dehydrogenase, mitochondrial	ALDH2	Aldehyde dehydrogenase, mitochondrial;Isoform 2 of Aldehyde dehydrogenase, mitochondrial;Uncharacterized protein (Fragment)	4	5	4	4	0	1	0	2	2	3	0	0	0	2	2	3	0	0	0	2	2	3	14.3	12.8	12.8	56.381	517	517;470;259;117	0.00075245	7.4904	0	1.5	0	5	5.2	10.1	7128000	0	0	0	2048400	1393000
P05120;H7C004;H7BYS2;E9PDK7;E7ERB5;E7EPJ9	P05120;H7C004;H7BYS2	6;3;3;1;1;1	6;3;3;1;1;1	6;3;3;1;1;1	Plasminogen activator inhibitor 2	SERPINB2;SERPINB10	Plasminogen activator inhibitor 2;Serpin B10 (Fragment);Serpin B10 (Fragment)	6	6	6	6	5	4	5	0	0	0	5	4	5	0	0	0	5	4	5	0	0	0	21.2	21.2	21.2	46.596	415	415;253;280;113;132;161	0	22.245	18.8	13	19.3	0	0	0	42646000	14027000	5522800	23095000	0	0
P05121;P05121-2	P05121;P05121-2	3;2	3;2	3;2	Plasminogen activator inhibitor 1	SERPINE1	Plasminogen activator inhibitor 1;Isoform 2 of Plasminogen activator inhibitor 1	2	3	3	3	2	2	3	0	0	0	2	2	3	0	0	0	2	2	3	0	0	0	10.2	10.2	10.2	45.059	402	402;387	0	9.5901	7.5	7.5	10.2	0	0	0	27357000	6359000	2779200	18219000	0	0
P05141;Q9H0C2	P05141	15;3	15;3	7;0	ADP/ATP translocase 2;ADP/ATP translocase 2, N-terminally processed	SLC25A5	ADP/ATP translocase 2	2	15	15	7	8	13	12	13	14	12	8	13	12	13	14	12	2	6	4	6	7	4	52.3	52.3	31.2	32.852	298	298;315	0	59.643	26.2	48	49	50	48.3	37.2	762860000	83794000	64451000	107600000	175750000	161110000
P05198;H0YJS4;G3V4T5	P05198;H0YJS4;G3V4T5	14;12;12	14;12;12	14;12;12	Eukaryotic translation initiation factor 2 subunit 1	EIF2S1	Eukaryotic translation initiation factor 2 subunit 1;Eukaryotic translation initiation factor 2 subunit 1 (Fragment);Eukaryotic translation initiation factor 2 subunit 1 (Fragment)	3	14	14	14	12	11	11	8	10	5	12	11	11	8	10	5	12	11	11	8	10	5	52.7	52.7	52.7	36.112	315	315;252;273	0	77.864	49.8	47.6	47.9	31.4	46.7	21.9	275100000	58427000	37875000	78977000	35770000	39006000
P05386	P05386	4	3	3	60S acidic ribosomal protein P1	RPLP1	60S acidic ribosomal protein P1	1	4	3	3	2	2	2	4	3	3	2	2	2	3	2	2	2	2	2	3	2	2	89.5	74.6	74.6	11.514	114	114	0	80.303	51.8	51.8	51.8	89.5	66.7	66.7	1048800000	203690000	91208000	233330000	154260000	186540000
P05387;H0YDD8;P05386-2	P05387	7;3;1	7;3;1	6;2;0	60S acidic ribosomal protein P2	RPLP2	60S acidic ribosomal protein P2	3	7	7	6	5	5	5	6	6	7	5	5	5	6	6	7	5	5	5	5	5	6	91.3	91.3	76.5	11.665	115	115;92;89	0	168.56	69.6	69.6	69.6	84.3	84.3	91.3	1105100000	201400000	122160000	213280000	180270000	173120000
P05388;F8VWS0;P05388-2;F8VU65;F8VPE8;G3V210;F8VW21;F8VQY6;F8VRK7;F8VZS0;Q8NHW5;F8VS58;F8VWV4;F8W1K8	P05388;F8VWS0;P05388-2;F8VU65;F8VPE8;G3V210;F8VW21;F8VQY6;F8VRK7;F8VZS0;Q8NHW5;F8VS58	11;10;10;9;8;8;8;7;7;7;7;6;5;2	11;10;10;9;8;8;8;7;7;7;7;6;5;2	11;10;10;9;8;8;8;7;7;7;7;6;5;2	60S acidic ribosomal protein P0;60S acidic ribosomal protein P0-like	RPLP0;RPLP0P6	60S acidic ribosomal protein P0;60S acidic ribosomal protein P0;Isoform 2 of 60S acidic ribosomal protein P0;60S acidic ribosomal protein P0 (Fragment);60S acidic ribosomal protein P0 (Fragment);60S acidic ribosomal protein P0;60S acidic ribosomal protein	14	11	11	11	8	8	8	9	10	9	8	8	8	9	10	9	8	8	8	9	10	9	47.6	47.6	47.6	34.273	317	317;281;255;247;153;166;244;142;156;246;317;121;111;107	0	140.81	39.4	39.4	39.4	41.6	45.4	43.2	1269800000	210240000	122670000	279120000	210190000	220860000
P05455;E7ERC4;E9PGX9;E9PFL9	P05455;E7ERC4	10;5;3;3	10;5;3;3	10;5;3;3	Lupus La protein	SSB	Lupus La protein;Lupus La protein (Fragment)	4	10	10	10	6	4	5	6	9	7	6	4	5	6	9	7	6	4	5	6	9	7	32.6	32.6	32.6	46.836	408	408;184;120;134	0	52.935	19.6	12	15.9	18.4	29.2	21.6	290270000	37935000	15228000	39895000	55072000	76711000
P05556;P05556-2;P05556-5;P05556-4;P05556-3;C9JPK5;E7ERX5;Q5T3E6;E9PLR6;E7EUI6;E7EQW5;C9JJP8;Q5T3E5;E9PQJ2;H7C4N8	P05556;P05556-2;P05556-5;P05556-4;P05556-3	14;13;13;13;13;3;3;3;3;3;3;2;2;2;2	14;13;13;13;13;3;3;3;3;3;3;2;2;2;2	14;13;13;13;13;3;3;3;3;3;3;2;2;2;2	Integrin beta-1	ITGB1	Integrin beta-1;Isoform 2 of Integrin beta-1;Isoform 5 of Integrin beta-1;Isoform 4 of Integrin beta-1;Isoform 3 of Integrin beta-1	15	14	14	14	14	12	14	11	10	11	14	12	14	11	10	11	14	12	14	11	10	11	27.3	27.3	27.3	88.414	798	798;789;801;819;825;98;124;136;143;152;163;31;89;104;108	0	116.43	27.3	24.9	27.3	22.8	21.1	23.7	1009700000	238760000	140800000	449150000	63498000	54632000
P06396-2;A0A0A0MS51;A0A0A0MT01;P06396-4;P06396-3;P06396;Q5T0I0;A0A0U1RQL8;REV__H0YJM7;REV__Q6TDU7-4;REV__Q6TDU7-2;REV__Q6TDU7-3;REV__Q6TDU7;REV__F8W8F9	P06396-2;A0A0A0MS51;A0A0A0MT01;P06396-4;P06396-3;P06396	25;23;23;23;23;23;9;4;1;1;1;1;1;1	25;23;23;23;23;23;9;4;1;1;1;1;1;1	25;23;23;23;23;23;9;4;1;1;1;1;1;1	Gelsolin	GSN	Isoform 2 of Gelsolin;Gelsolin;Gelsolin;Isoform 4 of Gelsolin;Isoform 3 of Gelsolin;Gelsolin	14	25	25	25	15	11	15	22	19	22	15	11	15	22	19	22	15	11	15	22	19	22	48.2	48.2	48.2	80.64	731	731;748;767;739;742;782;260;232;548;657;676;690;716;722	0	323.31	31.7	25.6	31.2	43.4	39.7	45.6	1134200000	125520000	78002000	182020000	257190000	237820000
P06576;H0YH81;F8W079;F8W0P7;H0YI37	P06576;H0YH81;F8W079	23;19;13;8;6	23;19;13;8;6	23;19;13;8;6	ATP synthase subunit beta, mitochondrial;ATP synthase subunit beta	ATP5B	ATP synthase subunit beta, mitochondrial;ATP synthase subunit beta (Fragment);ATP synthase F1 subunit beta (Fragment)	5	23	23	23	21	19	19	21	22	21	21	19	19	21	22	21	21	19	19	21	22	21	67.7	67.7	67.7	56.559	529	529;362;284;270;133	0	323.31	65	60.9	59.7	64.7	65	65	2232000000	275220000	179680000	333260000	485210000	460940000
P06703;R4GN98	P06703;R4GN98	3;2	3;2	3;2	Protein S100-A6;Protein S100	S100A6	Protein S100-A6;Protein S100 (Fragment)	2	3	3	3	2	2	2	2	3	2	2	2	2	2	3	2	2	2	2	2	3	2	56.7	56.7	56.7	10.18	90	90;85	0	38.149	27.8	27.8	27.8	27.8	56.7	27.8	174700000	28826000	17030000	23069000	53196000	38474000
P06730;P06730-2;D6RBW1;P06730-3;D6RFJ3	P06730;P06730-2;D6RBW1;P06730-3	3;3;2;2;1	3;3;2;2;1	3;3;2;2;1	Eukaryotic translation initiation factor 4E	EIF4E	Eukaryotic translation initiation factor 4E;Isoform 2 of Eukaryotic translation initiation factor 4E;Eukaryotic translation initiation factor 4E;Isoform 3 of Eukaryotic translation initiation factor 4E	5	3	3	3	0	1	2	0	0	2	0	1	2	0	0	2	0	1	2	0	0	2	27.6	27.6	27.6	25.097	217	217;248;245;237;42	0.00077459	8.069	0	5.1	21.2	0	0	22.6	16753000	0	1658900	7431600	0	0
P06733;P06733-2;K7EM90;E5RI09;E5RG95;K7EPM1;K7EKN2;E5RGZ4	P06733;P06733-2	26;19;11;2;2;2;2;2	26;19;11;2;2;2;2;2	23;17;9;0;0;0;0;0	Alpha-enolase	ENO1	Alpha-enolase;Isoform MBP-1 of Alpha-enolase	8	26	26	23	26	24	20	19	22	20	26	24	20	19	22	20	23	21	17	16	19	17	76	76	67.5	47.168	434	434;341;195;148;154;196;212;283	0	323.31	76	67.1	62.2	60.1	69.6	67.1	25481000000	4878200000	2783700000	6780400000	3813200000	3511600000
P06737-2;P06737;E9PK47	P06737-2;P06737;E9PK47	12;12;11	8;8;7	8;8;7	Glycogen phosphorylase, liver form;Alpha-1,4 glucan phosphorylase	PYGL	Isoform 2 of Glycogen phosphorylase, liver form;Glycogen phosphorylase, liver form;Alpha-1,4 glucan phosphorylase	3	12	8	8	9	9	11	5	4	3	5	5	8	1	0	1	5	5	8	1	0	1	22.3	16.7	16.7	93.133	813	813;847;819	0	37.954	15.4	15.5	20.2	7	5.5	3.4	74738000	27057000	12099000	32090000	1940400	0
P06748-2;P06748;P06748-3;E5RI98;E5RGW4	P06748-2;P06748;P06748-3	10;10;9;4;1	10;10;9;4;1	10;10;9;4;1	Nucleophosmin	NPM1	Isoform 2 of Nucleophosmin;Nucleophosmin;Isoform 3 of Nucleophosmin	5	10	10	10	10	8	9	9	9	9	10	8	9	9	9	9	10	8	9	9	9	9	58.1	58.1	58.1	29.464	265	265;294;259;111;59	0	323.31	58.1	52.1	55.5	55.5	55.5	55.5	4090100000	596940000	339310000	842690000	743650000	755920000
Q5HYB6;P06753-2;A0A087WWU8;P06753-5;Q5VU61;P06753-3;P06753-6;P06753-4;D6R904;D6RFM2	Q5HYB6;P06753-2;A0A087WWU8;P06753-5;Q5VU61;P06753-3;P06753-6;P06753-4	16;16;14;14;13;13;13;11;6;3	16;16;14;14;13;13;13;11;6;3	4;4;4;4;3;4;4;4;4;3	Tropomyosin alpha-3 chain	DKFZp686J1372;TPM3	Epididymis luminal protein 189;Isoform 2 of Tropomyosin alpha-3 chain;Tropomyosin alpha-3 chain;Isoform 5 of Tropomyosin alpha-3 chain;Tropomyosin alpha-3 chain;Isoform 3 of Tropomyosin alpha-3 chain;Isoform 6 of Tropomyosin alpha-3 chain;Isoform 4 of Trop	10	16	16	4	14	11	13	15	15	14	14	11	13	15	15	14	3	3	3	4	3	3	50.4	50.4	15.9	27.175	232	232;248;227;248;223;247;248;247;95;49	0	95.914	43.1	34.5	41.4	47.4	46.1	43.1	1296900000	180280000	120260000	232240000	263550000	243370000
P06756-3;P06756-2;P06756	P06756-3;P06756-2;P06756	5;5;5	5;5;5	5;5;5	Integrin alpha-V;Integrin alpha-V heavy chain;Integrin alpha-V light chain	ITGAV	Isoform 3 of Integrin alpha-V;Isoform 2 of Integrin alpha-V;Integrin alpha-V	3	5	5	5	3	0	4	0	0	0	3	0	4	0	0	0	3	0	4	0	0	0	7.4	7.4	7.4	111.13	1002	1002;1012;1048	0	12.084	5.3	0	4.3	0	0	0	15968000	8983200	0	6984600	0	0
Q16778;P33778;P23527;P06899;Q8N257;Q6DRA6;Q6DN03	Q16778;P33778;P23527;P06899;Q8N257	6;6;6;6;5;2;2	2;2;2;2;2;2;2	2;2;2;2;2;2;2	Histone H2B type 2-E;Histone H2B type 1-B;Histone H2B type 1-O;Histone H2B type 1-J;Histone H2B type 3-B	HIST2H2BE;HIST1H2BB;HIST1H2BO;HIST1H2BJ;HIST3H2BB	Histone H2B type 2-E;Histone H2B type 1-B;Histone H2B type 1-O;Histone H2B type 1-J;Histone H2B type 3-B	7	6	2	2	5	5	6	6	6	6	2	2	2	2	2	2	2	2	2	2	2	2	41.3	7.9	7.9	13.92	126	126;126;126;126;126;164;193	0	12.789	35.7	35.7	41.3	41.3	41.3	41.3	434860000	43080000	24317000	52347000	104250000	83576000
P07099;B1AQP9;B1AQP8	P07099	24;8;6	24;8;6	24;8;6	Epoxide hydrolase 1	EPHX1	Epoxide hydrolase 1	3	24	24	24	4	0	0	22	20	19	4	0	0	22	20	19	4	0	0	22	20	19	68.6	68.6	68.6	52.948	455	455;161;136	0	236.26	15.4	0	0	67	60.4	60.4	2417700000	23404000	0	0	812670000	697700000
P07195;A8MW50;C9J7H8;F5H793	P07195;A8MW50	18;10;8;7	17;9;8;7	17;9;8;7	L-lactate dehydrogenase B chain;L-lactate dehydrogenase	LDHB	L-lactate dehydrogenase B chain;L-lactate dehydrogenase (Fragment)	4	18	17	17	18	17	17	15	17	17	17	16	16	14	16	16	17	16	16	14	16	16	67.7	64.1	64.1	36.638	334	334;232;136;102	0	216.27	67.7	67.4	67.4	59.9	67.4	67.4	2694800000	553830000	252520000	611650000	387080000	380080000
P07237;H7BZ94;H0Y3Z3;I3L398;I3L312;I3NI03;I3L0S0;I3L3U6;I3L4M2;I3L514;I3L3P5;I3L1Y5	P07237;H7BZ94;H0Y3Z3	32;30;17;14;12;10;9;9;8;5;4;2	32;30;17;14;12;10;9;9;8;5;4;2	32;30;17;14;12;10;9;9;8;5;4;2	Protein disulfide-isomerase	P4HB	Protein disulfide-isomerase;Protein disulfide-isomerase;Protein disulfide-isomerase (Fragment)	12	32	32	32	27	28	28	26	24	26	27	28	28	26	24	26	27	28	28	26	24	26	67.9	67.9	67.9	57.116	508	508;464;274;200;208;166;148;188;117;106;156;54	0	323.31	55.3	58.9	60.6	55.3	49.2	56.7	4379900000	819350000	519880000	1194400000	592600000	624050000
P07355;P07355-2;H0YN42;H0YMD0;H0YMU9;H0YM50;A6NMY6;H0YKS4;H0YNP5;H0YN28;H0YL33;H0YMM1;H0YNA0;H0YKZ7;H0YLV6;H0YMT9;H0YKX9;H0YN52;H0YKL9;H0YMW4;H0YKV8;H0YMD9;H0YNB8;H0YKN4;H0YLE2	P07355;P07355-2;H0YN42;H0YMD0;H0YMU9;H0YM50;A6NMY6;H0YKS4;H0YNP5	28;27;22;21;21;20;20;17;15;13;13;11;10;9;9;9;9;8;8;8;6;5;4;4;2	28;27;22;21;21;20;20;17;15;13;13;11;10;9;9;9;9;8;8;8;6;5;4;4;2	28;27;22;21;21;20;20;17;15;13;13;11;10;9;9;9;9;8;8;8;6;5;4;4;2	Annexin A2;Annexin;Putative annexin A2-like protein	ANXA2;ANXA2P2	Annexin A2;Isoform 2 of Annexin A2;Annexin (Fragment);Annexin (Fragment);Annexin;Annexin (Fragment);Putative annexin A2-like protein;Annexin (Fragment);Annexin (Fragment)	25	28	28	28	24	25	26	26	22	23	24	25	26	26	22	23	24	25	26	26	22	23	74	74	74	38.604	339	339;357;256;227;230;248;339;176;175;139;142;149;79;119;132;133;134;59;110;146;81;65;47;69;45	0	323.31	69	69	74	74	67	66.1	13356000000	2299100000	1102600000	2381500000	2090100000	2328400000
P07384;E9PRM1;E9PJJ3;E9PLC9;E9PMC6;E9PJA6;E9PSA6;E9PQB3;E9PLX0;E9PL37	P07384	17;4;3;3;3;3;3;3;2;2	17;4;3;3;3;3;3;3;2;2	17;4;3;3;3;3;3;3;2;2	Calpain-1 catalytic subunit	CAPN1	Calpain-1 catalytic subunit	10	17	17	17	11	12	11	10	10	11	11	12	11	10	10	11	11	12	11	10	10	11	32.6	32.6	32.6	81.889	714	714;201;135;148;152;161;163;191;122;191	0	59.97	20.7	26.1	23.4	19.2	19.2	24.5	211510000	29822000	23089000	32630000	25848000	42452000
Q5JP53;P07437;Q5ST81;A6NNZ2	Q5JP53;P07437;Q5ST81	23;23;20;7	6;6;3;0	5;5;3;0	Tubulin beta chain	TUBB	Tubulin beta chain;Tubulin beta chain;Tubulin beta chain	4	23	6	5	21	21	21	21	22	22	5	5	5	5	6	5	4	4	4	4	5	4	73.5	20.4	16.9	47.766	426	426;444;372;444	0	202.97	71.1	73.2	73.2	73.2	73.5	73.2	7251000000	836060000	466360000	1203400000	1661000000	1554100000
P07602;C9JIZ6;P07602-2;P07602-3;A0A0J9YXB8;Q5BJH1	P07602;C9JIZ6;P07602-2;P07602-3	7;6;6;6;3;2	7;6;6;6;3;2	7;6;6;6;3;2	Prosaposin;Saposin-A;Saposin-B-Val;Saposin-B;Saposin-C;Saposin-D	PSAP	Prosaposin;Prosaposin;Isoform Sap-mu-6 of Prosaposin;Isoform Sap-mu-9 of Prosaposin	6	7	7	7	2	1	3	3	5	4	2	1	3	3	5	4	2	1	3	3	5	4	16	16	16	58.112	524	524;527;526;527;167;240	0	19.107	5.3	1.5	8.2	7.4	11.3	8	106380000	7993100	5587600	23544000	17522000	30001000
P07686;Q5URX0;H0Y9B6;H0YA83;D6REQ8	P07686;Q5URX0;H0Y9B6;H0YA83	9;8;7;6;1	9;8;7;6;1	9;8;7;6;1	Beta-hexosaminidase subunit beta;Beta-hexosaminidase subunit beta chain B;Beta-hexosaminidase subunit beta chain A	HEXB	Beta-hexosaminidase subunit beta;Beta-hexosaminidase subunit beta;Beta-hexosaminidase subunit beta (Fragment);Beta-hexosaminidase subunit beta (Fragment)	5	9	9	9	5	3	5	4	4	4	5	3	5	4	4	4	5	3	5	4	4	4	22.8	22.8	22.8	63.111	556	556;331;202;170;35	0	36.488	12.8	7.7	12.1	8.6	9	11.5	107000000	28636000	12508000	39506000	9798100	6714000
P07711	P07711	3	3	3	Cathepsin L1;Cathepsin L1 heavy chain;Cathepsin L1 light chain	CTSL	Cathepsin L1	1	3	3	3	3	2	1	0	0	0	3	2	1	0	0	0	3	2	1	0	0	0	15.3	15.3	15.3	37.564	333	333	0	12.351	15.3	11.1	6.9	0	0	0	51338000	8735500	29912000	12690000	0	0
P07737;K7EJ44;I3L3D5	P07737;K7EJ44	9;6;3	9;6;3	9;6;3	Profilin-1	PFN1	Profilin-1;Profilin	3	9	9	9	9	9	9	9	9	9	9	9	9	9	9	9	9	9	9	9	9	9	87.1	87.1	87.1	15.054	140	140;104;165	0	193.65	87.1	87.1	87.1	87.1	87.1	87.1	4347900000	780080000	399930000	886330000	773380000	738780000
P07741;H3BQZ9;P07741-2;H3BQF1;H3BQB1;H3BSW3	P07741;H3BQZ9;P07741-2;H3BQF1;H3BQB1;H3BSW3	7;6;6;5;5;4	7;6;6;5;5;4	7;6;6;5;5;4	Adenine phosphoribosyltransferase	APRT	Adenine phosphoribosyltransferase;Adenine phosphoribosyltransferase;Isoform 2 of Adenine phosphoribosyltransferase;Adenine phosphoribosyltransferase (Fragment);Adenine phosphoribosyltransferase (Fragment);Adenine phosphoribosyltransferase	6	7	7	7	3	3	2	5	7	6	3	3	2	5	7	6	3	3	2	5	7	6	50.6	50.6	50.6	19.608	180	180;153;134;148;162;63	0	65.063	20.6	27.2	18.9	39.4	50.6	46.1	154460000	12701000	9653200	16437000	26648000	43701000
P07814;V9GYZ6;V9GZ76	P07814;V9GYZ6	28;15;3	28;15;3	28;15;3	Bifunctional glutamate/proline--tRNA ligase;Glutamate--tRNA ligase;Proline--tRNA ligase	EPRS	Bifunctional glutamate/proline--tRNA ligase;Bifunctional glutamate/proline--tRNA ligase (Fragment)	3	28	28	28	10	10	12	17	21	21	10	10	12	17	21	21	10	10	12	17	21	21	28.2	28.2	28.2	170.59	1512	1512;968;194	0	154.02	11.4	11.5	13.5	17.9	22.6	21	399780000	31187000	25676000	47898000	87662000	105570000
P07858;E9PKQ7;E9PNL5;E9PHZ5;E9PLY3;E9PSG5;E9PQM1;R4GMQ5;E9PR54;E9PJ67;E9PCB3;E9PS78	P07858	9;3;3;3;3;3;3;2;2;2;2;1	9;3;3;3;3;3;3;2;2;2;2;1	9;3;3;3;3;3;3;2;2;2;2;1	Cathepsin B;Cathepsin B light chain;Cathepsin B heavy chain	CTSB	Cathepsin B	12	9	9	9	8	7	8	9	8	8	8	7	8	9	8	8	8	7	8	9	8	8	36.6	36.6	36.6	37.821	339	339;136;143;148;165;170;175;76;98;101;110;92	0	69.304	34.2	28.9	34.2	36.6	31.3	34.2	595890000	93078000	46346000	104520000	145770000	96922000
P07900;P07900-2;Q58FG0;Q14568;G3V2J8	P07900;P07900-2	39;39;8;7;6	27;27;4;2;4	27;27;4;2;4	Heat shock protein HSP 90-alpha	HSP90AA1	Heat shock protein HSP 90-alpha;Isoform 2 of Heat shock protein HSP 90-alpha	5	39	27	27	35	36	37	30	32	33	23	25	25	19	20	21	23	25	25	19	20	21	57.9	41.7	41.7	84.659	732	732;854;334;343;174	0	323.31	54.8	55.5	56.7	48.1	52.2	54.4	3577500000	867100000	560300000	1058900000	380250000	318430000
P07919	P07919	1	1	1	Cytochrome b-c1 complex subunit 6, mitochondrial	UQCRH	Cytochrome b-c1 complex subunit 6, mitochondrial	1	1	1	1	0	0	0	1	1	1	0	0	0	1	1	1	0	0	0	1	1	1	19.8	19.8	19.8	10.739	91	91	0.00071327	6.2515	0	0	0	19.8	19.8	19.8	45724000	0	0	0	19598000	11956000
P07951-2;P07951-3	P07951-2;P07951-3	13;10	8;5	3;3			Isoform 2 of Tropomyosin beta chain;Isoform 3 of Tropomyosin beta chain	2	13	8	3	6	5	6	10	11	13	1	1	1	5	6	8	0	0	0	2	2	3	34.2	26.4	9.9	32.989	284	284;248	0	113.08	15.5	12.3	15.5	26.4	31	34.2	140890000	6039300	5381800	6524800	37279000	37524000
P07954-2;P07954	P07954-2;P07954	10;10	10;10	10;10	Fumarate hydratase, mitochondrial	FH	Isoform Cytoplasmic of Fumarate hydratase, mitochondrial;Fumarate hydratase, mitochondrial	2	10	10	10	5	5	7	8	7	7	5	5	7	8	7	7	5	5	7	8	7	7	43.9	43.9	43.9	50.212	467	467;510	0	105.73	18.6	19.7	28.9	36.4	28.7	28.9	622490000	75026000	26601000	65717000	167520000	153110000
P07996-2;P07996	P07996-2;P07996	3;3	3;3	3;3	Thrombospondin-1	THBS1	Isoform 2 of Thrombospondin-1;Thrombospondin-1	2	3	3	3	0	0	0	0	2	1	0	0	0	0	2	1	0	0	0	0	2	1	3.5	3.5	3.5	120.15	1085	1085;1170	0.00066138	4.7104	0	0	0	0	2.2	1.3	5323200	0	0	0	0	4070700
P08133;P08133-2;E7EMC6;E5RK63;E5RJF5;E5RI05;E5RFF0;E5RJR0;E5RIU8	P08133;P08133-2	36;35;17;9;8;7;7;5;4	36;35;17;9;8;7;7;5;4	15;15;1;7;6;4;2;2;1	Annexin A6	ANXA6	Annexin A6;Isoform 2 of Annexin A6	9	36	36	15	25	23	23	29	32	32	25	23	23	29	32	32	11	8	9	13	14	14	64.8	64.8	27.6	75.872	673	673;641;330;150;129;129;156;110;95	0	323.31	50.7	45	44.6	50.7	59.6	59.3	1857000000	178830000	99889000	227550000	439090000	446190000
Q5JR08;P08134;E9PQH6	Q5JR08;P08134;E9PQH6	7;7;6	1;1;1	1;1;1	Rho-related GTP-binding protein RhoC	RHOC	Rho-related GTP-binding protein RhoC (Fragment);Rho-related GTP-binding protein RhoC;Rho-related GTP-binding protein RhoC (Fragment)	3	7	1	1	5	6	4	5	5	6	0	1	0	0	0	1	0	1	0	0	0	1	53.7	6.4	6.4	21.523	188	188;193;169	0.006993	2.7475	38.3	37.8	22.3	38.3	38.3	44.7	4012300	0	0	0	0	0
P08237-2;P08237;P08237-3;F8W1J8;F8VSF7;F8VW30;F8VSL1;F8VUB8;F8VYK8;F8VTQ3;F8VZI0;F8VX13;F8VNX2;F8VZQ1;F8VVE3;F8VP00	P08237-2;P08237;P08237-3	5;5;5;1;1;1;1;1;1;1;1;1;1;1;1;1	4;4;4;1;1;1;1;1;1;1;1;1;1;1;1;1	4;4;4;1;1;1;1;1;1;1;1;1;1;1;1;1	ATP-dependent 6-phosphofructokinase, muscle type	PFKM	Isoform 2 of ATP-dependent 6-phosphofructokinase, muscle type;ATP-dependent 6-phosphofructokinase, muscle type;Isoform 3 of ATP-dependent 6-phosphofructokinase, muscle type	16	5	4	4	2	2	4	4	3	2	1	1	3	3	2	1	1	1	3	3	2	1	12	10.8	10.8	81.775	749	749;780;851;84;102;116;139;141;149;149;152;156;157;161;165;176	0	15.547	3.5	3.5	10	8	5.5	3.5	75153000	13875000	4578800	22644000	10812000	9969400
P08238;Q58FF7;Q58FG1	P08238	42;14;1	42;14;1	26;7;0	Heat shock protein HSP 90-beta	HSP90AB1	Heat shock protein HSP 90-beta	3	42	42	26	38	35	35	34	38	39	38	35	35	34	38	39	22	21	20	22	23	24	67.5	67.5	44.8	83.263	724	724;597;418	0	323.31	64	61.9	63.4	59.5	62.6	65.5	9269200000	1632600000	955450000	1852000000	1662200000	1485500000
P08240-2;P08240	P08240-2;P08240	2;2	2;2	2;2	Signal recognition particle receptor subunit alpha	SRPR	Isoform 2 of Signal recognition particle receptor subunit alpha;Signal recognition particle receptor subunit alpha	2	2	2	2	0	0	0	2	0	0	0	0	0	2	0	0	0	0	0	2	0	0	5.9	5.9	5.9	66.558	610	610;638	0	9.1391	0	0	0	5.9	0	0	6814500	0	0	0	6814500	0
P08243-2;P08243;P08243-3;F8WEJ5;C9JT45;C9J057;C9JLN6;C9JM09	P08243-2;P08243;P08243-3	7;7;6;3;2;2;1;1	7;7;6;3;2;2;1;1	7;7;6;3;2;2;1;1	Asparagine synthetase [glutamine-hydrolyzing]	ASNS	Isoform 2 of Asparagine synthetase [glutamine-hydrolyzing];Asparagine synthetase [glutamine-hydrolyzing];Isoform 3 of Asparagine synthetase [glutamine-hydrolyzing]	8	7	7	7	0	0	0	4	6	5	0	0	0	4	6	5	0	0	0	4	6	5	17.4	17.4	17.4	62.168	540	540;561;478;401;162;214;63;118	0	17.453	0	0	0	10.7	15.4	11.5	51256000	0	0	0	11072000	23142000
P08559-3;P08559;P08559-4;P08559-2;Q5JPU3;Q5JPU0;Q5JPU1;Q5JPU2;Q5JPT9;P29803	P08559-3;P08559;P08559-4;P08559-2	7;7;7;6;2;2;2;1;1;1	7;7;7;6;2;2;2;1;1;1	7;7;7;6;2;2;2;1;1;1	Pyruvate dehydrogenase E1 component subunit alpha, somatic form, mitochondrial	PDHA1	Isoform 3 of Pyruvate dehydrogenase E1 component subunit alpha, somatic form, mitochondrial;Pyruvate dehydrogenase E1 component subunit alpha, somatic form, mitochondrial;Isoform 4 of Pyruvate dehydrogenase E1 component subunit alpha, somatic form, mitocho	10	7	7	7	3	2	2	4	4	6	3	2	2	4	4	6	3	2	2	4	4	6	30.4	30.4	30.4	40.188	359	359;390;428;397;109;180;205;121;203;388	0	30.896	15.6	6.4	6.4	18.1	19.2	27.9	102220000	12744000	3642000	8529700	17398000	22465000
P08574	P08574	4	4	4	Cytochrome c1, heme protein, mitochondrial	CYC1	Cytochrome c1, heme protein, mitochondrial	1	4	4	4	3	2	2	4	4	3	3	2	2	4	4	3	3	2	2	4	4	3	22.5	22.5	22.5	35.422	325	325	0	43.187	15.1	11.1	11.1	22.5	22.5	15.1	117470000	14333000	6145800	20129000	27192000	29215000
P08621-2;P08621;P08621-3;M0QYR1;P08621-4;M0QX04	P08621-2;P08621;P08621-3;M0QYR1	10;10;7;5;3;2	10;10;7;5;3;2	10;10;7;5;3;2	U1 small nuclear ribonucleoprotein 70 kDa	SNRNP70	Isoform 2 of U1 small nuclear ribonucleoprotein 70 kDa;U1 small nuclear ribonucleoprotein 70 kDa;Isoform 3 of U1 small nuclear ribonucleoprotein 70 kDa;U1 small nuclear ribonucleoprotein 70 kDa (Fragment)	6	10	10	10	4	2	3	9	8	9	4	2	3	9	8	9	4	2	3	9	8	9	31.1	31.1	31.1	50.617	428	428;437;166;94;341;33	0	30.016	10.3	6.1	13.6	27.3	18.9	28.5	112690000	13264000	4228100	7718600	32118000	20892000
P08648	P08648	7	7	7	Integrin alpha-5;Integrin alpha-5 heavy chain;Integrin alpha-5 light chain	ITGA5	Integrin alpha-5	1	7	7	7	6	7	7	0	0	0	6	7	7	0	0	0	6	7	7	0	0	0	9.7	9.7	9.7	114.54	1049	1049	0	49.677	8.4	9.7	9.7	0	0	0	215570000	98057000	55421000	62097000	0	0
P08670;B0YJC4;B0YJC5;A0A1B0GTT5;A0A1B0GVG8;P17661;H7C5W5;P41219;P41219-2;U3KPR1;B4DIR1;K7ELP4;F8W835;K7EJU1;K7EKH9;A0A1X7SCE1;K7EMP8;A0A1X7SBR3;A0A087X106;A0A1W2PR46;E7EMV2;E7ESP9;Q8N1N4-2;P14136-3;P14136;P14136-2;O43790;P78385;Q14533;P78386;Q8N1N4;P07197-2;P07196;P07197;P12036-2;P12036	P08670;B0YJC4	58;53;26;17;10;6;4;4;4;1;1;1;1;1;1;1;1;1;1;1;1;1;1;1;1;1;1;1;1;1;1;1;1;1;1;1	58;53;26;17;10;6;4;4;4;1;1;1;1;1;1;1;1;1;1;1;1;1;1;1;1;1;1;1;1;1;1;1;1;1;1;1	54;49;23;16;10;3;2;2;2;0;0;0;1;0;0;0;0;0;0;0;0;0;0;0;0;0;0;0;0;0;0;0;0;0;0;0	Vimentin	VIM	Vimentin;Vimentin	36	58	58	54	54	56	41	37	38	37	54	56	41	37	38	37	50	52	37	34	35	34	89.3	89.3	85.4	53.651	466	466;431;228;149;109;470;200;470;471;143;179;189;207;248;261;334;432;472;484;505;698;877;410;431;432;438;486;493;505;507;520;540;543;916;963;1026	0	323.31	89.3	87.6	78.8	75.5	76.6	77.3	64021000000	17602000000	10057000000	21517000000	5243000000	4816300000
P08708;H0YN88;A0A075B716;H0YN73;H3BNC9	P08708;H0YN88;A0A075B716	6;5;5;2;1	6;5;5;2;1	6;5;5;2;1	40S ribosomal protein S17	RPS17	40S ribosomal protein S17;40S ribosomal protein S17;40S ribosomal protein S17	5	6	6	6	5	4	5	6	4	4	5	4	5	6	4	4	5	4	5	6	4	4	55.6	55.6	55.6	15.55	135	135;136;191;59;293	0	140.98	48.9	48.1	48.9	55.6	48.1	48.1	393580000	39906000	30973000	85808000	84488000	73595000
P08754	P08754	5	1	1	Guanine nucleotide-binding protein G(k) subunit alpha	GNAI3	Guanine nucleotide-binding protein G(k) subunit alpha	1	5	1	1	3	3	5	2	2	3	0	0	1	0	0	0	0	0	1	0	0	0	21.8	9	9	40.532	354	354	0	18.958	9.3	9.3	21.8	5.6	5.6	9.3	3285800	0	0	3285800	0	0
P08758;D6RBL5;D6RBE9;E9PHT9;D6RCN3	P08758;D6RBL5;D6RBE9	19;14;12;8;1	19;14;12;8;1	19;14;12;8;1	Annexin A5;Annexin	ANXA5	Annexin A5;Annexin;Annexin	5	19	19	19	18	17	19	18	18	19	18	17	19	18	18	19	18	17	19	18	18	19	68.8	68.8	68.8	35.936	320	320;260;220;163;35	0	323.31	65.6	63.1	68.8	65.6	65.6	68.8	3510900000	566720000	321400000	1224800000	420490000	422530000
P09012;M0R268;M0QZG7;M0R0G9;M0QXK2;M0R221;M0R2B8	P09012;M0R268;M0QZG7	5;4;3;2;2;2;2	5;4;3;2;2;2;2	3;2;2;1;1;1;1	U1 small nuclear ribonucleoprotein A	SNRPA	U1 small nuclear ribonucleoprotein A;U1 small nuclear ribonucleoprotein A (Fragment);U1 small nuclear ribonucleoprotein A (Fragment)	7	5	5	3	3	2	3	4	5	3	3	2	3	4	5	3	3	2	3	2	3	2	25.5	25.5	20.2	31.279	282	282;256;184;87;128;142;148	0	17.963	20.2	9.9	20.2	22	25.5	12.4	51941000	5906500	3823000	10451000	12873000	15338000
P09104;P09104-2;F5H0C8;F5H1C3;P13929-3;P13929-2;P13929;U3KQP4;U3KQQ1	P09104;P09104-2;F5H0C8	19;16;14;5;4;4;4;2;1	16;13;12;4;1;1;1;2;1	16;13;12;4;1;1;1;2;1	Gamma-enolase;Enolase	ENO2	Gamma-enolase;Isoform 2 of Gamma-enolase;Gamma-enolase	9	19	16	16	17	16	18	9	8	9	14	13	15	6	5	6	14	13	15	6	5	6	68	55.3	55.3	47.268	434	434;391;315;103;391;406;434;73;86	0	286.2	59.2	56.2	66.1	35.9	29.3	34.1	794540000	215130000	148620000	355560000	35148000	19766000
P09211;A8MX94;A0A087X2E9;A0A087X243	P09211;A8MX94	12;9;5;1	12;9;5;1	12;9;5;1	Glutathione S-transferase P	GSTP1	Glutathione S-transferase P;Glutathione S-transferase P	4	12	12	12	11	8	11	12	12	12	11	8	11	12	12	12	11	8	11	12	12	12	61	61	61	23.356	210	210;174;79;69	0	323.31	57.6	51.9	57.6	61	61	61	2683800000	276810000	143420000	329830000	630610000	648670000
P09382;F8WEI7	P09382	9;2	9;2	9;2	Galectin-1	LGALS1	Galectin-1	2	9	9	9	8	8	9	8	8	8	8	8	9	8	8	8	8	8	9	8	8	8	83.7	83.7	83.7	14.716	135	135;38	0	323.31	83.7	83.7	83.7	83.7	83.7	83.7	8253300000	1670000000	899810000	2053800000	1210800000	1178200000
P09417-2;P09417	P09417-2;P09417	2;2	2;2	2;2	Dihydropteridine reductase	QDPR	Isoform 2 of Dihydropteridine reductase;Dihydropteridine reductase	2	2	2	2	1	2	0	0	0	0	1	2	0	0	0	0	1	2	0	0	0	0	19.2	19.2	19.2	22.408	213	213;244	0.0080506	2.626	8	19.2	0	0	0	0	6907300	2890700	4016600	0	0	0
Q5T7C4;P09429;B2RPK0	Q5T7C4;P09429;B2RPK0	8;8;5	8;8;5	6;6;3	High mobility group protein B1;Putative high mobility group protein B1-like 1	HMGB1;HMGB1P1	High mobility group protein B1;High mobility group protein B1;Putative high mobility group protein B1-like 1	3	8	8	6	7	4	6	4	2	3	7	4	6	4	2	3	5	4	5	3	2	3	58.9	58.9	46.2	18.311	158	158;215;211	0	36.102	58.9	36.1	47.5	34.8	20.3	30.4	203780000	49111000	26963000	56944000	26624000	28388000
P09486;F5H4E2	P09486	8;1	8;1	4;1	SPARC	SPARC	SPARC	2	8	8	4	2	0	1	4	7	6	2	0	1	4	7	6	1	0	1	1	4	3	48.5	48.5	29.4	34.632	303	303;111	0	39.043	16.5	0	11.2	24.1	42.2	40.6	123380000	14321000	0	7622100	22596000	33915000
P09493-3;Q6ZN40;P09493-9;P09493-8;P09493-4;P09493-10;P09493-2;P09493-7;P09493;H0YKX5;H0YL52;P09493-6;H0YKP3;H0YNC7;H0YL42;H0YK20	P09493-3;Q6ZN40;P09493-9;P09493-8;P09493-4;P09493-10;P09493-2;P09493-7;P09493;H0YKX5;H0YL52;P09493-6	11;10;10;9;9;9;8;8;8;7;7;6;5;5;4;3	6;5;5;6;4;4;6;5;3;3;3;3;0;3;4;3	0;0;0;0;0;0;0;0;0;0;0;0;0;0;0;0	Tropomyosin alpha-1 chain	TPM1	Isoform 3 of Tropomyosin alpha-1 chain;Tropomyosin 1 (Alpha), isoform CRA_f;Isoform 9 of Tropomyosin alpha-1 chain;Isoform 8 of Tropomyosin alpha-1 chain;Isoform 4 of Tropomyosin alpha-1 chain;Isoform 10 of Tropomyosin alpha-1 chain;Isoform 2 of Tropomyosi	16	11	6	0	5	4	6	9	10	10	1	1	2	4	5	5	0	0	0	0	0	0	32	20.1	0	32.876	284	284;326;284;284;284;284;228;284;284;142;265;284;157;223;108;92	0	29.282	15.1	12.3	21.8	25.7	28.9	28.9	176690000	2954900	0	7862900	55874000	54022000
P09496-2;P09496-4;P09496-3;P09496;F8WF69;P09496-5;C9J8P9	P09496-2;P09496-4;P09496-3;P09496;F8WF69	7;6;6;6;5;3;2	7;6;6;6;5;3;2	7;6;6;6;5;3;2	Clathrin light chain A	CLTA	Isoform Non-brain of Clathrin light chain A;Isoform 4 of Clathrin light chain A;Isoform 3 of Clathrin light chain A;Clathrin light chain A;Clathrin light chain	7	7	7	7	7	6	4	5	4	5	7	6	4	5	4	5	7	6	4	5	4	5	28.9	28.9	28.9	23.662	218	218;230;236;248;260;166;196	0	103.64	28.9	25.2	20.6	24.8	21.1	24.8	163210000	45201000	22286000	15531000	35789000	28033000
P09525;Q6P452;P09525-2;B4E1S2	P09525;Q6P452;P09525-2	12;11;9;4	12;11;9;4	12;11;9;4	Annexin A4;Annexin	ANXA4	Annexin A4;Annexin;Isoform 2 of Annexin A4	4	12	12	12	2	2	3	7	8	10	2	2	3	7	8	10	2	2	3	7	8	10	46.4	46.4	46.4	35.882	319	319;299;237;142	0	63.576	8.5	7.8	12.2	25.4	28.5	39.8	138020000	7424400	4133600	8643900	29045000	42406000
P09543-2;P09543;K7EN66;C9K0L8;K7ERZ0	P09543-2;P09543	5;5;1;1;1	5;5;1;1;1	5;5;1;1;1	2,3-cyclic-nucleotide 3-phosphodiesterase	CNP	Isoform CNPI of 2,3-cyclic-nucleotide 3-phosphodiesterase;2,3-cyclic-nucleotide 3-phosphodiesterase	5	5	5	5	2	0	3	3	1	2	2	0	3	3	1	2	2	0	3	3	1	2	18.5	18.5	18.5	45.098	401	401;421;120;144;153	0	17.243	9.2	0	10.7	10.5	3.5	6.5	47598000	7528400	0	14126000	19670000	0
P09601;B1AHA8	P09601;B1AHA8	6;5	6;5	6;5	Heme oxygenase 1	HMOX1	Heme oxygenase 1;Heme oxygenase 1 (Fragment)	2	6	6	6	5	5	5	0	0	0	5	5	5	0	0	0	5	5	5	0	0	0	33.3	33.3	33.3	32.818	288	288;187	0	53.466	28.8	27.8	27.8	0	0	0	71409000	24514000	5926100	40969000	0	0
P09622;E9PEX6;P09622-2;P09622-3;F8WDM5;A0A1W2PR83;F2Z2E3	P09622;E9PEX6;P09622-2;P09622-3	9;8;8;8;1;1;1	9;8;8;8;1;1;1	9;8;8;8;1;1;1	Dihydrolipoyl dehydrogenase, mitochondrial;Dihydrolipoyl dehydrogenase	DLD	Dihydrolipoyl dehydrogenase, mitochondrial;Dihydrolipoyl dehydrogenase;Isoform 2 of Dihydrolipoyl dehydrogenase, mitochondrial;Isoform 3 of Dihydrolipoyl dehydrogenase, mitochondrial	7	9	9	9	5	4	8	6	4	3	5	4	8	6	4	3	5	4	8	6	4	3	28.1	28.1	28.1	54.177	509	509;486;410;461;114;114;115	0	29.87	13.8	11.8	25.3	16.5	11.6	9.2	131810000	18172000	12717000	54123000	22551000	11175000
P09661;H0YKK0;H0YMA0;H0YLR3	P09661;H0YKK0;H0YMA0	4;3;2;1	4;3;2;1	4;3;2;1	U2 small nuclear ribonucleoprotein A	SNRPA1	U2 small nuclear ribonucleoprotein A;Small nuclear ribonucleoprotein polypeptide A, isoform CRA_a;U2 small nuclear ribonucleoprotein A (Fragment)	4	4	4	4	1	1	1	3	4	3	1	1	1	3	4	3	1	1	1	3	4	3	18.8	18.8	18.8	28.415	255	255;154;142;89	0	15.287	3.5	3.5	3.5	13.3	18.8	15.7	33547000	0	0	1333900	19283000	9462800
P09874;Q5VX84;Q5VX85	P09874	14;3;3	14;3;3	14;3;3	Poly [ADP-ribose] polymerase 1	PARP1	Poly [ADP-ribose] polymerase 1	3	14	14	14	3	1	2	10	8	12	3	1	2	10	8	12	3	1	2	10	8	12	22.4	22.4	22.4	113.08	1014	1014;108;155	0	31.497	3.8	1.1	2.6	16.8	13	17.5	145570000	3994000	3335500	9181200	42823000	40176000
P09936;D6RE83;D6R956;D6R974;D6RF53	P09936;D6RE83;D6R956;D6R974	9;8;8;6;2	9;8;8;6;2	9;8;8;6;2	Ubiquitin carboxyl-terminal hydrolase isozyme L1;Ubiquitin carboxyl-terminal hydrolase	UCHL1	Ubiquitin carboxyl-terminal hydrolase isozyme L1;Ubiquitin carboxyl-terminal hydrolase;Ubiquitin carboxyl-terminal hydrolase;Ubiquitin carboxyl-terminal hydrolase	5	9	9	9	9	8	8	7	7	7	9	8	8	7	7	7	9	8	8	7	7	7	65.9	65.9	65.9	24.824	223	223;207;241;156;58	0	165.57	65.9	65.9	56.5	61.4	61.4	56.5	1209500000	264110000	169160000	261880000	148060000	172490000
P09960-2;P09960;P09960-3;P09960-4;B4DEH5	P09960-2;P09960;P09960-3;P09960-4	7;7;5;5;2	7;7;5;5;2	7;7;5;5;2	Leukotriene A-4 hydrolase	LTA4H	Isoform 2 of Leukotriene A-4 hydrolase;Leukotriene A-4 hydrolase;Isoform 3 of Leukotriene A-4 hydrolase;Isoform 4 of Leukotriene A-4 hydrolase	5	7	7	7	0	0	0	4	6	3	0	0	0	4	6	3	0	0	0	4	6	3	20.7	20.7	20.7	59.732	532	532;611;508;587;132	0	13.798	0	0	0	12	17.3	8.8	26890000	0	0	0	8235300	14460000
P09972;A8MVZ9;J3KSV6;J3QKP5;C9J8F3;J3QKK1;K7EKH5;A0A087WXX2;P05062	P09972;A8MVZ9;J3KSV6;J3QKP5;C9J8F3	15;12;9;9;8;7;7;2;2	12;12;9;9;8;7;7;1;1	12;12;9;9;8;7;7;1;1	Fructose-bisphosphate aldolase C;Fructose-bisphosphate aldolase	ALDOC	Fructose-bisphosphate aldolase C;Fructose-bisphosphate aldolase;Fructose-bisphosphate aldolase C (Fragment);Fructose-bisphosphate aldolase C (Fragment);Fructose-bisphosphate aldolase C (Fragment)	9	15	12	12	12	11	12	4	4	4	9	8	9	1	1	1	9	8	9	1	1	1	54.1	44.5	44.5	39.455	364	364;336;175;180;149;122;135;316;364	0	166.8	48.1	46.2	45.1	15.9	15.9	15.9	907170000	156410000	107030000	265120000	155890000	108530000
Q71UI9;P0C0S5;C9J0D1;Q71UI9-4;Q71UI9-2;Q71UI9-3;C9J386	Q71UI9;P0C0S5;C9J0D1;Q71UI9-4;Q71UI9-2;Q71UI9-3	5;5;4;4;4;3;2	5;5;4;4;4;3;2	3;3;2;3;2;2;1	Histone H2A.V;Histone H2A.Z;Histone H2A	H2AFV;H2AFZ	Histone H2A.V;Histone H2A.Z;Histone H2A;Isoform 4 of Histone H2A.V;Isoform 2 of Histone H2A.V;Isoform 3 of Histone H2A.V	7	5	5	3	5	5	5	5	5	5	5	5	5	5	5	5	3	3	3	3	3	3	53.9	53.9	41.4	13.509	128	128;128;122;102;114;90;76	0	195.76	53.9	53.9	53.9	53.9	53.9	53.9	4706600000	634610000	277650000	516180000	1157100000	1097300000
P0DN76;Q01081;Q01081-2;K7EJH3;A0A1B0GW87;K7EJM7;M0QYK5;M0R2N4;Q01081-3;Q01081-4;Q8WU68-3;Q8WU68-2;Q8WU68	P0DN76;Q01081;Q01081-2	3;3;2;1;1;1;1;1;1;1;1;1;1	3;3;2;1;1;1;1;1;1;1;1;1;1	3;3;2;1;1;1;1;1;1;1;1;1;1	Splicing factor U2AF 35 kDa subunit	U2AF1	Splicing factor U2AF 35 kDa subunit-like protein;Splicing factor U2AF 35 kDa subunit;Isoform 2 of Splicing factor U2AF 35 kDa subunit	13	3	3	3	3	2	2	3	3	3	3	2	2	3	3	3	3	2	2	3	3	3	17.9	17.9	17.9	27.872	240	240;240;240;39;45;51;66;97;75;167;181;202;220	0	37.642	17.9	10.4	10.4	17.9	17.9	17.9	60207000	4414000	6301600	10429000	12529000	13210000
P0DN79;P35520;P35520-2;H7C2H4	P0DN79;P35520;P35520-2	3;3;3;1	3;3;3;1	3;3;3;1	Cystathionine beta-synthase	CBS	Cystathionine beta-synthase-like protein;Cystathionine beta-synthase;Isoform 2 of Cystathionine beta-synthase	4	3	3	3	0	0	0	2	2	3	0	0	0	2	2	3	0	0	0	2	2	3	8	8	8	60.586	551	551;551;565;224	0.00071942	6.3874	0	0	0	3.8	3.8	8	16127000	0	0	0	5027100	831100
P10155-3;P10155-5;P10155-4;P10155;H0Y9N5;P10155-2	P10155-3;P10155-5;P10155-4;P10155	4;4;4;4;1;1	4;4;4;4;1;1	4;4;4;4;1;1	60 kDa SS-A/Ro ribonucleoprotein	TROVE2	Isoform 3 of 60 kDa SS-A/Ro ribonucleoprotein;Isoform 5 of 60 kDa SS-A/Ro ribonucleoprotein;Isoform 4 of 60 kDa SS-A/Ro ribonucleoprotein;60 kDa SS-A/Ro ribonucleoprotein	6	4	4	4	1	0	2	2	4	2	1	0	2	2	4	2	1	0	2	2	4	2	9.5	9.5	9.5	58.482	518	518;525;534;538;193;205	0	9.5478	2.9	0	5.2	4.8	9.5	5.2	21129000	2150700	0	1697300	2343300	9100800
P10253	P10253	5	5	5	Lysosomal alpha-glucosidase;76 kDa lysosomal alpha-glucosidase;70 kDa lysosomal alpha-glucosidase	GAA	Lysosomal alpha-glucosidase	1	5	5	5	0	0	0	2	4	2	0	0	0	2	4	2	0	0	0	2	4	2	9.5	9.5	9.5	105.32	952	952	0	24.933	0	0	0	4.6	6.7	2.3	41446000	0	0	0	8234700	26539000
P10316;P01891;P30453;P30457;P16190;A0A140T8W8;A0A1W2PR61;A0A1W2PPF8;A0A140T8Y4;A0A0G2JPD3;P30450;P18462;P30456	P10316;P01891;P30453;P30457;P16190	17;13;10;9;9;8;8;8;8;8;8;8;7	2;2;2;2;1;2;2;2;2;2;2;2;1	0;0;0;0;0;0;0;0;0;0;0;0;0	HLA class I histocompatibility antigen, A-69 alpha chain;HLA class I histocompatibility antigen, A-68 alpha chain;HLA class I histocompatibility antigen, A-34 alpha chain;HLA class I histocompatibility antigen, A-66 alpha chain;HLA class I histocompatibility antigen, A-33 alpha chain	HLA-A	HLA class I histocompatibility antigen, A-69 alpha chain;HLA class I histocompatibility antigen, A-68 alpha chain;HLA class I histocompatibility antigen, A-34 alpha chain;HLA class I histocompatibility antigen, A-66 alpha chain;HLA class I histocompatibili	13	17	2	0	10	6	9	13	15	15	0	0	1	1	1	1	0	0	0	0	0	0	51.5	6	0	40.976	365	365;365;365;365;365;299;325;339;371;394;365;365;365	0.00067204	4.9538	31.5	19.2	29.3	40.8	47.7	43.3	14942000	0	0	8206700	6735200	0
P10319;P18465;A0A140T9G0;A0A1W2PP29;A0A1W2PQZ3;A0A1W2PQE2	P10319;P18465;A0A140T9G0	9;8;5;1;1;1	5;4;3;0;0;0	0;0;0;0;0;0	HLA class I histocompatibility antigen, B-58 alpha chain;HLA class I histocompatibility antigen, B-57 alpha chain	HLA-B	HLA class I histocompatibility antigen, B-58 alpha chain;HLA class I histocompatibility antigen, B-57 alpha chain;HLA class I histocompatibility antigen, B-46 alpha chain (Fragment)	6	9	5	0	7	5	6	8	8	9	3	2	3	4	4	5	0	0	0	0	0	0	31.2	19.3	0	40.337	362	362;362;241;49;80;80	0	64.161	25.4	17.7	22.1	27.9	27.9	31.2	446400000	61500000	10644000	41060000	107750000	93754000
P10599;P10599-2	P10599;P10599-2	8;6	8;6	8;6	Thioredoxin	TXN	Thioredoxin;Isoform 2 of Thioredoxin	2	8	8	8	7	7	7	8	7	7	7	7	7	8	7	7	7	7	7	8	7	7	65.7	65.7	65.7	11.737	105	105;85	0	65.392	65.7	57.1	57.1	65.7	57.1	57.1	1199100000	158120000	100790000	184820000	260330000	227090000
X6R5C5;X6R8A1;P10619-2;P10619;U3KQ41;U3KQU6	X6R5C5;X6R8A1;P10619-2;P10619	4;4;4;4;1;1	4;4;4;4;1;1	4;4;4;4;1;1	Carboxypeptidase;Lysosomal protective protein;Lysosomal protective protein 32 kDa chain;Lysosomal protective protein 20 kDa chain	CTSA	Carboxypeptidase;Carboxypeptidase;Isoform 2 of Lysosomal protective protein;Lysosomal protective protein	6	4	4	4	4	4	4	4	4	4	4	4	4	4	4	4	4	4	4	4	4	4	12.1	12.1	12.1	54.255	481	481;498;463;480;109;231	0	38.672	12.1	12.1	12.1	12.1	12.1	12.1	175960000	29978000	21989000	31992000	31361000	36101000
P10644;K7EM13;P10644-2;K7EPB2	P10644;K7EM13;P10644-2	5;4;4;2	5;4;4;2	5;4;4;2	cAMP-dependent protein kinase type I-alpha regulatory subunit;cAMP-dependent protein kinase type I-alpha regulatory subunit, N-terminally processed	PRKAR1A	cAMP-dependent protein kinase type I-alpha regulatory subunit;cAMP-dependent protein kinase type I-alpha regulatory subunit (Fragment);Isoform 2 of cAMP-dependent protein kinase type I-alpha regulatory subunit	4	5	5	5	4	3	5	4	3	3	4	3	5	4	3	3	4	3	5	4	3	3	15.5	15.5	15.5	42.981	381	381;153;337;297	0	31.722	15.2	12.3	15.5	15.2	12.3	10.8	126420000	29423000	10282000	31632000	19559000	12603000
P10768;X6RA14;H7BZT7;U3KQT1	P10768;X6RA14;H7BZT7	8;7;5;3	8;7;5;3	8;7;5;3	S-formylglutathione hydrolase	ESD	S-formylglutathione hydrolase;S-formylglutathione hydrolase;S-formylglutathione hydrolase (Fragment)	4	8	8	8	7	7	8	7	7	6	7	7	8	7	7	6	7	7	8	7	7	6	44	44	44	31.462	282	282;253;230;120	0	74.571	39.7	39.7	44	36.9	39.7	31.6	481590000	88904000	40738000	126340000	76192000	71987000
P10809;E7ESH4;E7EXB4;P10809-2;C9JL25;C9J0S9;C9JL19;C9JCQ4	P10809	32;11;10;3;2;1;1;1	32;11;10;3;2;1;1;1	32;11;10;3;2;1;1;1	60 kDa heat shock protein, mitochondrial	HSPD1	60 kDa heat shock protein, mitochondrial	8	32	32	32	28	27	28	26	27	23	28	27	28	26	27	23	28	27	28	26	27	23	71	71	71	61.054	573	573;234;221;158;175;58;83;94	0	323.31	63.4	61.4	68.8	60.2	65.4	56.7	2593400000	506370000	252420000	524940000	481630000	476650000
P11021	P11021	27	26	26	78 kDa glucose-regulated protein	HSPA5	78 kDa glucose-regulated protein	1	27	26	26	25	26	24	25	25	24	24	25	23	24	24	23	24	25	23	24	24	23	46	46	46	72.332	654	654	0	323.31	43.9	44.2	44	44	44.6	42.8	4721700000	764060000	482900000	1058200000	811470000	782550000
P11142;E9PKE3;P11142-2;E9PNE6;E9PN89;A8K7Q2;E9PLF4;E9PQQ4;E9PQK7;E9PK54;E9PPY6;E9PN25;E9PI65;E9PS65;E9PM13	P11142;E9PKE3;P11142-2;E9PNE6;E9PN89;A8K7Q2	32;31;25;23;19;17;13;12;12;12;10;9;8;7;5	32;31;25;23;19;17;13;12;12;12;10;9;8;7;5	24;23;17;19;12;14;10;10;10;10;8;7;5;7;5	Heat shock cognate 71 kDa protein	HSPA8	Heat shock cognate 71 kDa protein;Heat shock cognate 71 kDa protein;Isoform 2 of Heat shock cognate 71 kDa protein;Heat shock cognate 71 kDa protein;Heat shock cognate 71 kDa protein (Fragment);Heat shock cognate 71 kDa protein	15	32	32	24	30	29	28	30	28	30	30	29	28	30	28	30	22	22	21	23	22	23	66.4	66.4	54.5	70.897	646	646;627;493;500;312;410;187;171;178;183;137;132;168;223;150	0	323.31	63.5	61.9	58.5	63.6	58.5	63.6	11662000000	2287200000	1128800000	1354400000	2789200000	2351500000
P11166	P11166	4	4	4	Solute carrier family 2, facilitated glucose transporter member 1	SLC2A1	Solute carrier family 2, facilitated glucose transporter member 1	1	4	4	4	3	2	2	2	4	2	3	2	2	2	4	2	3	2	2	2	4	2	9.3	9.3	9.3	54.083	492	492	0	12.335	6.3	3.7	3.7	3.7	9.3	3.7	54299000	13187000	2677300	4091200	5126700	15048000
P11177-2;P11177;P11177-3;C9J634;F8WF02	P11177-2;P11177;P11177-3;C9J634	9;9;8;7;4	9;9;8;7;4	9;9;8;7;4	Pyruvate dehydrogenase E1 component subunit beta, mitochondrial	PDHB	Isoform 2 of Pyruvate dehydrogenase E1 component subunit beta, mitochondrial;Pyruvate dehydrogenase E1 component subunit beta, mitochondrial;Isoform 3 of Pyruvate dehydrogenase E1 component subunit beta, mitochondrial;Pyruvate dehydrogenase E1 component su	5	9	9	9	3	3	4	6	7	6	3	3	4	6	7	6	3	3	4	6	7	6	36.4	36.4	36.4	37.2	341	341;359;341;350;251	0	29.34	11.7	11.4	12.3	21.7	28.4	21.7	93233000	4919000	4849100	14443000	7773900	29148000
P11216;H0Y4Z6;P11217;P11217-2	P11216	24;6;6;5	24;6;6;5	20;5;2;1	Glycogen phosphorylase, brain form	PYGB	Glycogen phosphorylase, brain form	4	24	24	20	5	5	5	20	21	15	5	5	5	20	21	15	1	1	2	16	17	13	37.7	37.7	32.4	96.695	843	843;245;842;754	0	96.025	7.5	6.9	7.1	31.8	32.6	25.3	333950000	27293000	13983000	30051000	96929000	90635000
P11233;H7C3P7;P11234;P11234-2;C9JPE8;C9JYR1;C9J6B1;C9JQB3;P11234-3	P11233;H7C3P7;P11234;P11234-2	4;3;2;2;1;1;1;1;1	4;3;2;2;1;1;1;1;1	4;3;2;2;1;1;1;1;1	Ras-related protein Ral-A;Ras-related protein Ral-B	RALA;RALB	Ras-related protein Ral-A;Ras-related protein Ral-A (Fragment);Ras-related protein Ral-B;Isoform 2 of Ras-related protein Ral-B	9	4	4	4	1	0	2	1	1	2	1	0	2	1	1	2	1	0	2	1	1	2	27.2	27.2	27.2	23.567	206	206;164;206;228;101;112;167;171;227	0	17.015	6.8	0	13.1	7.3	7.3	17	9464100	1432300	0	1285300	2179500	2428300
P11245;E7EWF9	P11245;E7EWF9	2;1	2;1	2;1	Arylamine N-acetyltransferase 2	NAT2	Arylamine N-acetyltransferase 2;Arylamine N-acetyltransferase 2	2	2	2	2	0	0	1	1	0	1	0	0	1	1	0	1	0	0	1	1	0	1	7.6	7.6	7.6	33.542	290	290;160	0.0053035	2.8801	0	0	4.1	3.4	0	3.4	25211000	0	0	1662900	13941000	0
P11279;P11279-2	P11279;P11279-2	2;1	2;1	2;1	Lysosome-associated membrane glycoprotein 1	LAMP1	Lysosome-associated membrane glycoprotein 1;Isoform 2 of Lysosome-associated membrane glycoprotein 1	2	2	2	2	2	0	2	0	0	0	2	0	2	0	0	0	2	0	2	0	0	0	4.8	4.8	4.8	44.882	417	417;364	0.00065574	4.545	4.8	0	4.8	0	0	0	24545000	12247000	0	12298000	0	0
P11387;E5RJ95;E5RFS0;E5RIC7;Q969P6-2;Q969P6	P11387	6;1;1;1;1;1	6;1;1;1;1;1	6;1;1;1;1;1	DNA topoisomerase 1	TOP1	DNA topoisomerase 1	6	6	6	6	3	2	3	5	4	4	3	2	3	5	4	4	3	2	3	5	4	4	10.5	10.5	10.5	90.725	765	765;201;221;376;503;601	0	16.088	5.8	3.1	5.8	8.9	7.5	7.3	74103000	14003000	4407600	7579300	21049000	9990700
P11413;P11413-3;P11413-2;E7EUI8;E7EM57;E9PD92	P11413;P11413-3;P11413-2;E7EUI8;E7EM57	33;33;33;20;18;15	33;33;33;20;18;15	33;33;33;20;18;15	Glucose-6-phosphate 1-dehydrogenase	G6PD	Glucose-6-phosphate 1-dehydrogenase;Isoform 3 of Glucose-6-phosphate 1-dehydrogenase;Isoform Long of Glucose-6-phosphate 1-dehydrogenase;Glucose-6-phosphate 1-dehydrogenase (Fragment);Glucose-6-phosphate 1-dehydrogenase (Fragment)	6	33	33	33	19	15	14	30	28	26	19	15	14	30	28	26	19	15	14	30	28	26	72.2	72.2	72.2	59.256	515	515;545;561;338;320;256	0	323.31	44.5	37.1	33.4	67.6	66	63.7	2463600000	150750000	56564000	92729000	783130000	642330000
[truncated: 1,021 more rows]
[truncated: 26 more columns]

## Sheet: U87MG specific
Table SI. Proteins identified by LC-MS/MS with ≥2 unique peptides and ≥2 intensity values, and lists of specific proteins for each cell line.
[truncated: 83 more rows]

## Sheet: T98G specific
Protein IDs	Majority protein IDs	Protein names	Gene names	Number of proteins	Razor + unique peptides	Q-value	Score	LFQ intensity U87MG1	LFQ intensity U87MG2	LFQ intensity U87MG3	LFQ intensity T98G1	LFQ intensity T98G2	LFQ intensity T98G3
[truncated: 161 more rows]
